# Supplementary material for: Performance evaluation of humpback whale-inspired shortboard surfing fins based on ocean wave fieldwork
Source: PLoS One. 2020 Apr 21;15(4):e0232035. doi: 10.1371/journal.pone.0232035 (PMC7173857; doi:10.1371/journal.pone.0232035)
Supplement: S3 File — Includes TraceUpTM measured turn angles and durations, with means found in Table 3, measured turn speeds and Trace CB power, with means found in Table 4, and calculated rotation rates, powers and power coefficients, calculated per Eqs 4–6, with means found in Table 4. (CSV) [file pone.0232035.s006.csv]

visit_id	run_id	Participant	Skill	Whale?	Ave Session speed	Wave power	cutback_angle	cutback_power	cutback_speed	cutback_offset	cutback_relaxed	cutback_duration	CB yaw rate	cutback_roll_angle	CB roll rate	cutback_pitch_angle	CB Pitch rate	bottom_turn.angle	bottom_turn.offset	bottom_turn.duration	BT yaw rate	bottom_turn.vertical	bottom_turn.roll_angle	BT roll rate	bottom_turn.speed_gain	bottom_turn.initial_speed	Cutback power (watts)	CB Roll power (watts)	Pitch power (watts)	Total CB power(roll/pitch/yaw)	Cp Cutback using wave speed	Cp yaw only	Cp cutbacks using mean session speed	BT Yaw power	BT Roll Power	BT Cp using mean session speed	Total P/Inertia	Total CB Power/Inertia	Total Cp	Total P
122199	4938010	3	8	NO	5.77	14.4	4.5972405082316	9.490575909969	4.1637917403298	1517435971.7913	FALSE	0.46213126182556	9.9479106651887	1.8235763694806	3.94601387120385	1.5428270151243	3.3385038896301	3.351474807355	1517435970.866	0.92525839805603	3.62220414794014	1.4766916876432	1.1437315527695	1.23612123399526	0.078485378988244	4.5745139783891	3308.46762015186	520.571455365178	372.620641017387	4201.65971653443			1.19025	219	26	0.13873	143.89186	135.97604	3.78134	4446.25857
130395	5276851	3	8	NO	6.089	5	3.13193269300516	8.82563168132657	1.14562946310274	1523906768.61756	FALSE	0.504072427749634	6.21325928693872	1.84007115539867	3.65041024682391	1.03363163581186	2.05056174253842	1.93138910541245	1523906767.70486	0.912699222564697	2.11612879430884	1.01970897532116	0.874178015646661	0.957794193349052	0.134603772827218	7.33678488569257	1183.24450535554	408.431181620918	128.878728293948	1720.55441527041			0.47739	76	16	0.04588	58.63709	55.68137	1.41300	1811.88623
146087	5934777	3	8	NO	4.91	5.7	2.97202090946478	8.48029072622944	4.26228429284998	1537653752.11848	FALSE	0.530004978179932	5.6075339512298	1.19276941928731	2.25048719991905	1.03875398222258	1.95989476512036	1.63729021309932	1537653751.50347	0.615005731582642	2.66223569800879	1.02701912181492	0.4581047738268	0.744878869092689	0	6.14723792472792	916.626393845645	147.639181636285	111.97318736448	1176.23876284641	0.70032	0.54575	0.52774	178	14	0.09995	44.27921	38.06598	1.32620	1368.22755
130395	5276833	3	8	NO	6.089	5	3.36267059956047	8.78075066544315	5.72613866255296	1523908197.49587	FALSE	0.608007431030273	5.53064062697786	1.79826101963971	2.95763000230531	1.08025250465524	1.77670937808234	2.06270109744972	1523908196.64169	0.854176044464111	2.41484306521826	1.06670392934114	0.863169835571379	1.010529200819380	0	5.68252258800033	777.267440557467	222.283528809469	80.2144086071746	1079.76537797411	0.40862	0.29414	0.36137	105	18	0.05828	38.95512	34.94386	0.96881	1203.71317
119056	4806894	3	8	NO	5.14	11.5	2.5418812973172	7.7733140040669	5.3300134259821	1514767400.428	FALSE	0.46400594711304	5.4781222377263	1.3913792082491	2.99862365322256	1.2073209441731	2.60195144412443	1.1408481227712	1514767400.029	0.39900541305542	2.85922968822666	1.1985652189151	0.57132701323901	1.43187785063872	0.5963010955553	4.926045381182	999.236695391491	299.397977085179	225.425640570826	1524.0603130475	0.50801	0.33307	0.54627	317	79	0.12204	62.13604	49.32234	1.27996	1920.00354
126590	5116768	3	8	NO	5.64	10.4	3.4752460534643	8.9217217935686	7.1160097222402	1521320606.9057	FALSE	0.63700795173645	5.45557719333167	1.4880393587875	2.33598239194846	0.84617146921962	1.32835307143812	2.0267237169795	1521320605.4487	1.4570183753967	1.3910076572835	0.83826625139377	0.86368645017069	0.592776635322486	1.2071784888586	8.5557783729899	721.880051203571	132.349638624686	42.79673904972700	897.026428877984	0.23029	0.18533	0.36660	21	4	0.02266	29.81456	29.02998	1.23770	921.26986
126341	5106520	3	8	NO	5.12	8.2	2.9940016309866	8.3966286315332	5.0206453250961	1521153808.094	FALSE	0.55100584030151	5.43370217155645	1.5573899935737	2.82644915836372	1.3027813033419	2.36436931889691	1.8969105691622	1521153807.317	0.7770082950592	2.4413002811221	1.2840203646196	0.50854867560486	0.65449581277136	0.48623955852448	6.3538662493156	827.873426474349	224.003413983511	156.748326150441	1208.6251666083	0.53918	0.36932	0.51846	119	9	0.07684	43.22492	39.11408	1.38089	1335.65009
122199	4938014	3	8	NO	5.77	14.4	3.9843793409343	9.1416358433563	8.6432377852141	1517436669.4252	FALSE	0.74199938774109	5.36978790921131	1.4711579544153	1.98269429695087	0.96294989440737	1.29777720887201	2.2798190422558	1517436668.49	0.935218334198	2.43773989333824	0.95477816503421	1.0493022927046	1.1219864435233	0.59959291532177	7.6800024297908	600.397952066221	81.853348715212	35.06914863497760	717.320449416411	0.14540	0.12170	0.32626	98	21	0.06820	27.06439	23.21425	0.85980	836.28955
146087	5934788	3	8	NO	4.91	5.7	4.04700215109027	9.21896585403882	6.28061157002458	1537655714.08687	FALSE	0.756007194519043	5.35312650518477	1.18067849722147	1.56172918165494	0.866436078848716	1.146068562746850	1.79200360879501	1537655713.37387	0.713006734848022	2.51330530444004	0.8610349364597	0.643148044836406	0.902022398110298	0	7.70586304386705	585.622249945075	49.8441283922393	26.842549016206100	662.30892735352	0.25905	0.22906	0.42386	137	18	0.09326	26.43414	21.43395	1.01576	816.81501
126341	5106513	3	8	NO	5.12	8.2	3.6490064823981	8.9909826108618	4.9279443863456	1521152545.0025	FALSE	0.69100737571716	5.28070554762312	1.1622084278957	1.68190451902124	0.48761865812763	0.70566346360856	2.2032993400318	1521152543.8355	1.1670124530792	1.8879827153672	0.47054471416164	0.95693072695976	0.81998330389266	3.0161109926183	3.9813081908801	623.490304643472	63.2482444723528	11.13373973155940	697.872288847384	0.40526	0.36206	0.37542	47	9	0.05096	24.40012	22.58486	1.09060	753.96368
146087	5934785	3	8	NO	4.91	5.7	3.1348697419033	8.44730958829442	3.59600037735387	1537655176.24983	FALSE	0.594005584716797	5.27750886954692	0.863723121597044	1.454065658336930	0.577972934377376	0.973009259926294	3.12394246300292	1537655174.58682	1.66301560401917	1.87848054789924	0.57241268842487	0.555069330162069	0.333772773280407	4.51869835844172	1.4066808942726	724.429119918161	54.992820007468400	24.624754099685000	804.046694025314	0.75377	0.67913	0.40431	33	1	0.04761	27.11535	26.02093	1.60085	837.86444
126590	5116771	3	8	NO	5.64	10.4	3.6444039834006	8.952601717395	7.069683684691	1521321293.0724	FALSE	0.69100880622864	5.27403406519648	1.386738258176	2.00683152758137	0.68656066986146	0.99356283693191	1.8076503346279	1521321292.3924	0.68000841140747	2.65827643350243	0.68449935016907	0.841599239438	1.23763063120951	0	8.0729088491005	621.914615028774	90.0464782671278	22.07168957388910	734.032782869791	0.20711	0.17548	0.32542	161	35	0.08523	30.07721	23.75511	0.81749	929.38569
122199	4938014	3	8	NO	5.77	14.4	3.1420045885829	8.5272405458563	5.5702903870661	1517436672.2866	FALSE	0.60156726837158	5.22303116173223	1.4475857806977	2.4063572883815	1.0050514472436	1.67072163012498	3.9200646322703	1517436670.1672	2.1194298267365	1.8495845358119	0.99682706024801	0.93136248953369	0.439440116291938	0.096477189319883	8.9439225219391	700.631275068709	148.71833230236	71.6889923909381	921.038599762007	0.36443	0.27722	0.33964	25	1	0.03423	30.65968	29.80707	1.58018	947.38408
126590	5116756	3	8	NO	5.64	10.4	3.2655492013235	8.7012713532109	6.7255824084778	1521318362.1433	FALSE	0.62700796127319	5.20814631235709	1.3148945736197	2.09709390443736	0.70247081414469	1.12035389904502	1.874157934594	1521318361.4742	0.66900849342346	2.80139632458705	0.69757222510305	0.56364378054891	0.84250616560131	0	7.8939648578251	668.377438011669	108.365536224242	30.92900070008640	807.671974935997	0.22848	0.18908	0.32490	181	16	0.08483	32.53401	26.13825	0.83590	1005.30102
126590	5116764	3	8	NO	5.64	10.4	3.4754641813318	8.8824164329192	7.4924031406901	1521319617.8262	FALSE	0.66900849342346	5.19494777046417	1.694327788404	2.53259533333241	0.83044496570137	1.24130705942432	2.1117614875616	1521319616.5081	1.3180165290833	1.6022268620792	0.82454499279002	0.68343166287766	0.518530418850663	0	9.1699023349102	623.245603334774	148.125031917374	35.58404402600140	806.954679278149	0.19626	0.15158	0.34636	30	3	0.02811	27.19090	26.11504	1.07110	840.19878
126590	5116759	3	8	NO	5.64	10.4	3.2989474388101	8.7055148173369	7.0416809444848	1521319025.2557	FALSE	0.63700795173645	5.17881673190632	1.454241748983	2.2829255820415	0.82326361822086	1.29239143087098	1.7799307357764	1521319024.3376	0.91801166534424	1.93889773188117	0.82023773740419	0.58127634372954	0.63319058534139	0	8.4875477917157	650.496126845421	126.405840183797	40.51088862117140	817.412855650389	0.21431	0.17055	0.33407	63	7	0.04124	28.71940	26.45349	0.88535	887.42932
146087	5934785	3	8	NO	4.91	5.7	3.24593239358448	8.67877218952243	4.36351207775588	1537655173.95981	FALSE	0.627006053924561	5.17687568288618	0.981219538898552	1.564928333238400	0.535828810097415	0.854583152337288	1.78128747913255	1537655173.2148	0.745006799697876	2.39096808224424	0.475633485020221	0.565792157703446	0.759445629131026	0.113449539189888	5.89768694356566	660.377429811736	60.345606546272200	17.995561537520700	738.718597895529	0.49646	0.44381	0.39210	119	12	0.08231	28.13053	23.90675	1.00957	869.23333
126341	5106524	3	8	NO	5.12	8.2	3.1748067175965	8.6059959331115	5.9351580288203	1521154234.3845	FALSE	0.61500644683838	5.16223323172874	1.3838696853573	2.25017102255023	0.71967194401138	1.17018601627847	1.6076653503044	1521154233.5635	0.82100892066956	1.95815820002698	0.71681415965666	0.46204335003396	0.56277506663040	0.022946178376542	6.5948531295206	669.459116356402	127.19787930167	34.40001432485310	831.057009982925	0.29611	0.23853	0.39790	72	6	0.04993	29.42310	26.89505	1.01641	909.17368
126590	5116752	3	8	NO	5.64	10.4	2.5530654167127	6.9807359891963	6.0870345441984	1521317618.6358	FALSE	0.4970064163208	5.1368862309914	0.74166707114291	1.49226860416263	0.69077338551464	1.3898681442148	1.543064411995	1521317617.5888	1.0470132827759	1.47377730290483	0.83019438397821	1.1203544597877	1.0700479910029	0.16485765318571	6.8842073781521	820.2880464558340	69.2246059384297	60.0500938231727	949.562746217436	0.25994	0.22455	0.30278	32	17	0.03288	32.31423	30.73019	0.98912	998.50959
126341	5106507	3	8	NO	5.12	8.2	2.9145240654308	7.9872349456464	4.4852386927276	1521151392.3612	FALSE	0.57300615310669	5.08637481400332	0.68854667934356	1.20163924176109	0.93000967319048	1.62303610205267	2.0232936005089	1521151391.6492	0.71200752258301	2.84167447159663	0.92401363326165	0.50482131402223	0.70901120846427	0	5.8168194052632	697.566985969736	38.93295818806300	71.02734131682530	807.527285474624	0.46941	0.40549	0.36023	175	11	0.10317	32.15725	26.13357	0.99405	993.65899
119055	4806870	3	8	NO	5.37	10.6	2.8493800116265	7.8588860729166	6.1151058735182	1514746599.9708	FALSE	0.56200647354126	5.07001279482115	0.96813223400617	1.72263537803376	0.8713286439137	1.55038898115064	2.0646031372045	1514746599.2798	0.69100832939148	2.9878122294454	0.87014242650102	0.44704976220539	0.64695278362140	0	5.937050105051	706.651485658445	81.57815707434350	66.0797683626085	854.309411095397	0.26203	0.21674	0.33979	200	9	0.10219	34.40982	27.64755	0.94287	1063.26355
126341	5106507	3	8	NO	5.12	8.2	3.2310278309324	8.5677953837703	6.2192652769417	1521151389.1982	FALSE	0.64800691604614	4.98610084387177	1.1015779502409	1.69994782920259	0.55377820751338	0.85458687831960	2.877919237489	1521151387.6751	1.5230162143707	1.88961825247418	0.54669893036646	0.60427304184102	0.396760741047463	2.7879289587057	5.1224441678234	592.749175354324	68.9001280765415	17.41250616190230	679.061809592768	0.23217	0.20266	0.34257	36	2	0.04484	23.20002	21.97611	1.21164	716.88070
126590	5116754	3	8	NO	5.64	10.4	3.5351875344111	8.8606939387323	7.0724186643913	1521318157.6277	FALSE	0.71200919151306	4.9650869350417	1.0630251950079	1.49299364064235	0.5261065417939	0.738904143464628	1.6317883164172	1521318156.6126	1.0150127410889	1.6076530376029	0.52494257265964	0.75816306314487	0.746949306598375	0	9.0837121284677	534.929560391041	48.3680745704181	11.8472918593444	595.144926820804	0.17289	0.15540	0.27187	39	8	0.03115	20.80835	19.26035	0.71243	642.97816
126590	5116771	3	8	NO	5.64	10.4	3.4172036122879	8.7388567556002	8.5070659105268	1521321287.6203	FALSE	0.69100880622864	4.94523887609794	1.2792643469636	1.85129962951633	0.80570934572814	1.16598998227752	1.7970872697563	1521321286.8753	0.74500942230225	2.41216716991698	0.79973672620409	0.88971156281244	1.19422860460345	0.32330627333767	8.9424783624848	546.788599672043	76.6299125852242	30.39726712552200	653.815779382789	0.12740	0.10655	0.28986	121	30	0.07181	26.02126	21.15909	0.74079	804.05699
126590	5116751	3	8	NO	5.64	10.4	3.1463026254125	8.4558434619017	5.2326695295563	1521317463.1729	FALSE	0.63700795173645	4.93918893294165	1.2328428409332	1.93536491588925	0.74311669904981	1.16657366210910	1.5796250130701	1521317462.6439	0.52900671958923	2.9860206961013	0.67446182702674	0.31038527268312	0.58673219297504	0	6.623696994128	591.690924726825	90.8467422078782	33.00714524629000	715.544812180993	0.33973	0.28093	0.29243	260	10	0.09179	31.90958	23.15679	0.73761	986.00616
126341	5106508	3	8	NO	5.12	8.2	2.8243101061157	7.8018384604997	6.5121971649729	1521151456.2279	FALSE	0.57200622558594	4.93755134084877	0.9120586579796	1.59449078905623	0.95000753609219	1.66083425948562	2.2577902153297	1521151455.2449	0.9830105304718	2.2968118299262	0.94537423141041	0.64115510372958	0.652236251652213	0	11.199682926038	658.492718722612	68.6707447981248	74.50412487281740	801.667588393554	0.22067	0.18126	0.35699	83	7	0.06857	28.84358	25.94393	1.07896	891.26652
126341	5106513	3	8	NO	5.12	8.2	2.5871280513127	6.9031651410158	4.5697866645346	1521152548.9755	FALSE	0.52900552749634	4.8905501300846	0.87126018781863	1.64697747477631	0.85159783189604	1.60980894836100	3.8038438584931	1521152545.6935	3.282035112381	1.15898938562347	0.84552499651843	0.73347776211296	0.223482606674749	3.1582912307868	4.5043663009668	698.527814313445	79.22159697601170	75.68624306335770	853.435654352814	0.44121	0.36112	0.35148	6	0	0.01676	27.83152	27.61928	2.55154	859.99407
126591	5116775	3	8	NO	5.47	9.7	2.1582531306234	4.9439419640822	4.7864976530317	1521393637.4228	FALSE	0.44201040267944	4.88281071563068	0.37556276486942	0.84966951590456	1.0439811019069	2.36189260609784	0.55334967865464	1521393637.1848	0.23800539970398	2.32494590182773	1.0380396907875	0.55129572263205	2.31631603029900	0	4.5977959279692	833.365986988808	25.23457922045200	194.991772197801	1053.59233840706	0.41483	0.32812	0.31764	351	348	0.11350	56.72383	34.09684	0.81297	1752.76645
126590	5116756	3	8	NO	5.64	10.4	3.604643675261	8.9279556135855	6.0258407610996	1521318364.6813	FALSE	0.74500942230225	4.83838669331433	1.098332560581	1.47425324794806	0.57211430715028	0.76792895502223	1.56707481421	1521318364.0003	0.68100881576538	2.3011079708987	0.56754200396616	0.45299632473163	0.66518422999049	0	7.2413583574556	485.476115725153	45.0724229367482	12.22950290648710	542.778041568388	0.22728	0.20328	0.25944	120	10	0.05687	21.77818	17.56563	0.61567	672.94585
130360	5275439	3	8	NO	5.93	8.9	3.0276341985953	8.3205018757158	9.8228226571645	1523351186.9124	FALSE	0.62601137161255	4.83638850009447	1.5686228199399	2.50574173421046	0.89722761061996	1.43324490785013	2.1496771396607	1523351185.7464	1.1660208702087	1.8436009119425	0.8896097658562	0.80246419218145	0.688207400642684	0.18642700631443	9.8389393811978	577.282804148627	154.959738296661	50.69756215620750	782.940104601496	0.10367	0.07644	0.28445	45	6	0.03472	26.99843	25.33787	0.86764	834.25139
146097	5934993	3	8	NO	7.44	37.6	3.9621900970015	9.10140900228191	5.9640075509143	1538257921.83887	FALSE	0.821003675460815	4.82603210610183	1.22348780438531	1.49023425954651	0.573450897824665	0.698475433137126	2.13524299237726	1538257920.99687	0.842003583908081	2.53590724930971	0.569938766432993	0.913751825935802	1.085211326173590	2.41954575466209	7.13683373852044	438.292254641881	41.7919339671414	9.180908386340630	489.265096995363	0.23047	0.20646	0.14810	118	22	0.04334	20.35192	15.83382	0.38558	628.87432
126591	5116773	3	8	NO	5.47	9.7	3.0002031854458	8.212055418363	4.9005497899675	1521393275.8963	FALSE	0.62601470947266	4.79254423266364	1.2699319736395	2.0285976582072	0.70286024634869	1.12275356427449	1.7005460082403	1521393274.9133	0.98302292823792	1.72991489759913	0.69772633522812	0.56751725245049	0.57731842884659	0.21054922171253	6.4461853684736	566.860513117029	101.563061902031	31.11091832412880	699.534493343189	0.37214	0.30156	0.29869	47	5	0.03505	24.33033	22.63866	0.82509	751.80712
126590	5116753	3	8	NO	5.64	10.4	2.9335083935215	7.8097724094278	4.6035733411355	1521317700.3299	FALSE	0.61600780487061	4.76212861318806	0.68427150604154	1.11081629263653	0.33794773267021	0.54860949812348	1.2788722885797	1521317699.2829	1.0470132827759	1.2214480079843	0.34072727380392	0.60967794370886	0.582302014442881	2.6473681975128	5.276475921824	568.780252743074	30.94758404887390	7.54864346903883	607.276480260987	0.36024	0.33740	0.24000	22	5	0.01815	20.52736	19.65296	0.67676	634.29535
126590	5116771	3	8	NO	5.64	10.4	3.3335217815295	8.5919994786639	7.0653667078189	1521321290.2333	FALSE	0.70100903511047	4.75531928201778	1.485967144419	2.11975462510955	1.0052877624618	1.43405821053844	1.9271536028205	1521321289.3473	0.88601112365723	2.17508962513439	0.99434801328369	0.80428776057518	0.90776259924964	0.72217826051391	7.898037210156	498.38416093619	99.0321143306845	45.3250643070947	642.741339573969	0.18420	0.14283	0.28907	82	14	0.05506	23.93555	20.80069	0.75306	739.60862
126341	5106504	3	8	NO	5.12	8.2	2.4889573511847	6.5501567577067	6.3512932277364	1521151018.0182	FALSE	0.52900552749634	4.70497418611929	1.2329935228616	2.33077625615194	1.2668764656947	2.3948265185253	3.6187238788059	1521151016.1502	1.8680200576782	1.9371975498506	1.2542095835396	0.62657579793661	0.335422414422784	3.1993480180183	5.4125884188044	646.521190318794	158.6607285961	167.500609211154	972.682528126048	0.26032	0.17303	0.40059	31	1	0.04649	32.51298	31.47840	1.87479	1004.65113
119735	4837557	3	8	NO	6.97	21.2	3.1202488533614	8.2691821292733	7.8183075492185	1515262491.8787	FALSE	0.66901803016663	4.66392341112877	1.0306323976815	1.54051512995069	0.44714184852932	0.66835545286867	1.3151240200074	1515262491.3497	0.52901434898376	2.48598931679975	0.44261872056233	0.6468318336269	1.22271132128924	0	7.3370299137807	502.335049778277	54.8053048204034	10.31586506583520	567.456219664516	0.12675	0.11220	0.15948	180	44	0.04981	25.61849	18.36428	0.39840	791.61141
126590	5116766	3	8	NO	5.64	10.4	3.5554333667377	8.7618028747586	6.5736093880825	1521320316.149	FALSE	0.76700973510742	4.63544750998468	1.5294496302158	1.99404200521862	0.87401376396448	1.13950804528195	1.8421652316118	1521320315.512	0.63700819015503	2.8919019568076	0.87081641964089	0.45561069902115	0.71523522940932	0.35268206942972	7.8606290821223	432.823609923118	80.0933046220074	26.15546221130120	539.072376756427	0.19527	0.15679	0.26527	203	12	0.08797	24.41160	17.44571	0.67947	754.31839
126341	5106502	3	8	NO	5.12	8.2	2.8905927481075	7.5497366447465	5.7699418169053	1521150606.7968	FALSE	0.6270067691803	4.6101459987209	0.83998694446141	1.33967763308129	0.72406226777542	1.15479178753046	3.2311305929127	1521150605.1988	1.5980169773102	2.0219626191653	0.71735799552778	0.48706170613808	0.304791321402547	2.4714833857523	3.8713656779356	523.7036645240750	44.2238824904313	32.8597025320774	600.787249546584	0.23092	0.20129	0.29326	40	1	0.05029	20.75121	19.44295	1.11071	641.21236
126590	5116761	3	8	NO	5.64	10.4	2.5726720345278	6.9518665033265	4.8115281608389	1521319296.5881	FALSE	0.562007188797	4.57764969169649	1.0964618652674	1.95097480445832	1.1739505839783	2.08885332319537	4.1427361903836	1521319294.6771	1.9110243320465	2.1678092324168	1.212537611522	0.58951438260942	0.308480835499417	1.0509002953003	6.6364662004318	576.065309246829	104.638121533252	119.950621849316	800.654052629397	0.39667	0.28540	0.28869	38	1	0.04753	27.16558	25.91113	1.33184	839.41646
126341	5106504	3	8	NO	5.12	8.2	3.1065226963214	8.3087119602647	5.283316253872	1521151015.4702	FALSE	0.68000721931458	4.56836722917832	1.0216464367556	1.50240528002832	0.46190300049022	0.67926190688946	1.4588681732754	1521151014.9192	0.55100584030151	2.64764557209976	0.46131727472378	0.52002678659561	0.94377726797061	0.11324700933178	5.2602213709466	474.173168408046	51.2848586349744	10.48309400541350	535.941121048434	0.26645	0.23574	0.28372	197	25	0.09503	24.51375	17.34437	0.72593	757.47502
146087	5934787	3	8	NO	4.91	5.7	2.8519833390494	7.79900783865269	5.47780836878231	1537655580.64762	FALSE	0.626005887985229	4.55584107719558	1.06110513656231	1.6950401856082	0.507272823371161	0.810332351671316	2.39235464362679	1537655579.46961	1.17801094055176	2.03084246612027	0.503448756611189	0.507708761304583	0.430988154547004	1.59189333544868	4.9795774160935	512.25616967648	70.9104209213439	16.206021910118500	599.372612507942	0.25519	0.21810	0.31763	54	2	0.05637	21.22656	19.39717	1.00166	655.90062
146087	5934773	3	8	NO	4.91	5.7	2.84776328919497	7.75457651763528	7.64809663934466	1537652088.42487	FALSE	0.627005815505981	4.54184509739656	1.21704201001818	1.94103783397296	0.49772928672534	0.793819250820955	1.68178448371298	1537652087.82087	0.604005813598633	2.78438459671936	0.495453051924344	0.873979165057877	1.446971445275930	0	7.90676626637181	508.301687240208	92.8378161685054	15.5274510302442	616.666954438958	0.13490	0.11120	0.32731	198	54	0.12878	28.10788	19.95686	0.90509	868.53340
126591	5116775	3	8	NO	5.47	9.7	3.2272600749419	8.3716089534643	5.0251764008834	1521393634.9287	FALSE	0.71201658248901	4.5325630811298	1.2365185543359	1.73664291639582	0.70440192778057	0.98930550931578	2.1331511914297	1521393633.9027	1.0260241031647	2.0790458867878	0.6968675102187	0.95589144243912	0.931646185982122	1.0044200808356	6.5838834960068	445.785655433385	65.442432536768	21.23729651691760	532.465384487071	0.30640	0.25652	0.25859	65	13	0.05470	19.76126	17.23189	0.72387	610.62303
126902	5130386	3	8	NO	7.7	32.7	3.1243277075331	8.3525768548087	10.156942500284	1521750627.0112	FALSE	0.69100332260132	4.5214365913197	1.5150096553467	2.19247810508836	1.0315045260181	1.49276348214209	2.1007745756155	1521750625.8992	1.1120054721832	1.8891764727480	1.0252070512516	0.72715979281666	0.653917459047236	0.33680507775522	10.961169826779	457.089492034612	107.477827238768	49.8230548889064	614.390374162286	0.08399	0.06248	0.14613	50	6	0.02125	21.68021	19.88318	0.41576	669.91834
146087	5934787	3	8	NO	4.91	5.7	2.47138019129171	6.30160613989648	5.01431369160419	1537655578.91961	FALSE	0.550005197525024	4.49337606701302	1.14291759358221	2.07801235102003	0.523994949722598	0.952709087260502	1.24770472416481	1537655578.4226	0.497004747390747	2.51044830198344	0.521918229756225	0.458964589182845	0.923461177367799	0	6.10768220077121	567.162131219152	121.299200742167	25.496602049510600	713.95793401083	0.31873	0.25319	0.33241	196	27	0.09358	30.30369	23.10543	0.82994	936.38393
146097	5934993	3	8	NO	7.44	37.6	3.58977400859894	8.76319136753552	5.16461254246321	1538257918.68586	FALSE	0.799003601074219	4.49281330368558	1.48054667811278	1.85299124574941	0.651774109019238	0.815733631416631	2.2088212252076	1538257917.22785	1.45800638198853	1.51495991546694	0.647687207033977	0.783922783361335	0.53766759394576	0	11.4593829931182	390.316123017625	66.3936404436835	12.866975766293700	469.576739227602	0.28707	0.23861	0.13833	24	3	0.01472	16.08286	15.19666	0.41354	496.96053
126590	5116766	3	8	NO	5.64	10.4	3.0515060404041	8.138479871541	5.7109318112638	1521320310.5019	FALSE	0.68000864982605	4.48745180106855	1.7865381624943	2.62722858444713	0.96272808590132	1.41575858799383	1.5912652715454	1521320309.7569	0.74500942230225	2.13589952544228	0.96118278823643	0.32886073370667	0.44141822084668	0.65273587089363	7.4372682020151	457.5237472838	156.823003747146	45.53994022114450	659.886691252091	0.28078	0.19468	0.28789	95	4	0.04715	24.54808	21.35556	0.69349	758.53560
126590	5116766	3	8	NO	5.64	10.4	3.9092301021713	9.0204669764722	6.4119957602753	1521320313.212	FALSE	0.87501120567322	4.46763433065248	1.5747399558724	1.79967975914185	0.98121748671176	1.12137705248795	1.8504116731875	1521320312.403	0.80901026725769	2.28725363333133	0.97638333326441	0.40214005630985	0.49707657935293	0	7.8521590940074	352.427758773328	57.1880559511601	22.20333431613780	431.819149040626	0.18756	0.15307	0.24242	100	5	0.05431	17.36073	13.97473	0.57959	536.44649
126590	5116758	3	8	NO	5.64	10.4	2.6970776480035	6.9693743756926	8.8831593277992	1521318755.4772	FALSE	0.60500764846802	4.45792322598392	1.7208556911113	2.84435361349364	1.3554800266918	2.24043453024784	2.1884490818287	1521318754.6132	0.86401081085205	2.53289548503513	1.3343456709964	0.81606284294119	0.94450536114985	0	9.6957326668477	507.496192616609	206.602129511573	128.183502405672	842.281824533854	0.13179	0.07941	0.32694	115	16	0.07244	31.48722	27.25831	0.91699	972.95518
130363	5275461	3	8	NO	5.9	5	2.5540128313903	6.7244332891329	4.8838733074692	1523537995.9964	FALSE	0.57302737236023	4.4570520617028	1.3722538573221	2.39474399219352	0.95024924060939	1.65829642080697	1.5016820804466	1523537995.3054	0.69103288650513	2.17309785072791	0.94448644419135	0.51148031545667	0.74016783491081	0	6.5461223799933	535.609818834838	154.62200507443	74.14424423145440	764.376068140722	0.37476	0.26260	0.25679	106	12	0.04774	28.55037	24.73709	0.65379	882.20640
130395	5276853	3	8	NO	6.089	5	3.5207041338792	8.62121811717449	6.45604493982014	1523907229.44219	FALSE	0.794386386871338	4.4319794398106	1.7619832827932	2.21804314866561	0.922743375167854	1.161580045199470	2.22909534532649	1523907228.23918	1.2030131816864	1.85292678356335	0.917469162622087	0.833748484988095	0.693050165767374	0	6.81894720349114	382.025334432647	95.6834159428411	26.241881855275300	503.950632230763	0.19602	0.14859	0.22036	44	6	0.03328	17.93569	16.30908	0.60933	554.21275
146087	5934787	3	8	NO	4.91	5.7	2.87190324921335	7.63491168187605	4.23160838552243	1537655583.21765	FALSE	0.648005962371826	4.43190867982392	0.881097582942559	1.359705981280750	0.489886840426999	0.755991254515497	2.85597441768042	1537655581.27363	1.94401836395264	1.46910876493654	0.493361857791318	0.39994658863524	0.20573189844877	0.0308121911200105	5.45583548042528	468.307473020109	44.079788075404300	13.626459347450900	526.013720442964	0.38848	0.34586	0.28855	17	0	0.02878	17.58909	17.02310	1.19256	543.50294
126341	5106502	3	8	NO	5.12	8.2	2.7672631420845	7.1959835802144	5.1445753694583	1521150604.5728	FALSE	0.62600684165955	4.42049983790666	0.8916189717035	1.42429589002543	0.54648082149269	0.87296301753502	1.301301379439	1521150604.0008	0.57200598716736	2.27497859923319	0.54408244691291	0.39234514342395	0.68591090342758	0	6.0798608268432	482.272126485482	50.0668013533464	18.80793413062040	551.146861969449	0.26604	0.23280	0.26860	140	13	0.06791	22.77173	17.83647	0.65627	703.64653
130363	5275462	3	8	NO	5.9	5	3.5298022030687	8.6604959319678	6.0169315933359	1523538081.7035	FALSE	0.79903817176819	4.41756392596064	0.96291444069548	1.20509191515175	0.63628400031274	0.79631239506957	1.8993938736797	1523538080.9255	0.77803707122803	2.44126397561205	0.63434095709824	0.96181616558119	1.23620866042165	0	8.976165216778	377.334610810907	28.08027149140360	12.26105691569820	417.675939218009	0.18813	0.16996	0.19566	118	30	0.06783	18.32912	13.51702	0.52366	566.36978
126341	5106507	3	8	NO	5.12	8.2	2.7119563865858	6.9792929503709	5.4366172885581	1521151387.0601	FALSE	0.61500668525696	4.40963724719952	1.029779215122	1.67441954666191	0.53290493465605	0.86650266969601	1.6686788771574	1521151386.4341	0.62600660324097	2.66559309201899	0.52898810485741	0.52599403946051	0.84023720634467	1.8508442108099	4.9123305508905	488.488535610257	70.4331671187659	18.86203113137470	577.783733860398	0.24535	0.20743	0.27664	175	17	0.09396	24.93756	18.69850	0.74448	770.57068
126590	5116754	3	8	NO	5.64	10.4	2.5128118025876	6.0254706192172	5.3897310648471	1521318160.7047	FALSE	0.57200717926025	4.39297249002591	0.70610317500167	1.23443061661366	0.78085819242199	1.36511956621215	1.819174791792	1521318159.8837	0.82101035118103	2.21577570754754	0.77727733237587	0.82889136013962	1.00959915906937	0	6.0180494435325	521.247483539657	41.15857910245060	50.33480459386700	612.740867235975	0.24623	0.20947	0.22487	92	19	0.05877	23.44057	19.82980	0.64733	724.31354
119055	4806874	3	8	NO	5.37	10.6	3.0852929691111	8.1538807601186	6.4529083939548	1514747551.448	FALSE	0.71200847625732	4.33322505559059	1.200729805432	1.68639818972893	0.49369576362913	0.69338467180089	1.619515867437	1514747550.584	0.86401009559631	1.87441775934258	0.4901973475433	0.49794265113541	0.57631577880088	0.6712183904652	6.66496591675	407.442015273435	61.7111407580773	10.43258167622090	479.585737707733	0.16736	0.14218	0.24166	63	6	0.04205	17.74600	15.52057	0.61161	548.35141
122199	4938014	3	8	NO	5.77	14.4	3.0615411574514	7.9564578683031	5.2167861724769	1517436676.147	FALSE	0.71012854576111	4.31124924596583	1.2226020208266	1.72166296950677	0.88007245651144	1.23931429283438	1.0911115773982	1517436675.4797	0.66730165481567	1.63510995293365	0.87635347281651	0.44044525704675	0.66003920995583	1.7413905297975	4.6861285643608	404.387549485437	64.4893188749883	33.41599749846870	502.292865858894	0.26748	0.21534	0.21865	62	10	0.02945	18.58514	16.25543	0.48489	574.28085
122199	4938013	3	8	NO	5.77	14.4	2.66810771412	6.8909183995931	6.3501751077756	1517436455.7831	FALSE	0.62347865104675	4.27938905308233	1.1931145940145	1.91364145670649	1.1441650986628	1.8351311576457	1.7608848070965	1517436455.1915	0.59160780906677	2.97643942508839	1.129808868225	0.52790078794678	0.89231544928306	0	7.4867560256657	453.806215080548	90.7461144155765	83.452838783925	628.00516828005	0.19816	0.14319	0.24001	231	21	0.09144	28.48411	20.32379	0.65557	880.15907
126341	5106513	3	8	NO	5.12	8.2	2.6242126594562	6.7897533495718	6.1214347133912	1521152542.0325	FALSE	0.61600637435913	4.2600414032831	1.29078079663	2.0954016879661	0.77315719426699	1.25511232748420	1.3861318805163	1521152541.1475	0.88500952720642	1.56623385161931	0.76608239507824	0.61084901454115	0.69021744485546	0	7.7508942649823	455.167156992418	110.122954952879	39.51013083904230	604.800242784339	0.20291	0.15271	0.29004	43	8	0.03524	21.22788	19.57282	0.76650	655.94161
119055	4806871	3	8	NO	5.37	10.6	2.3441768520736	4.7496112022272	9.8926687859877	1514746861.4599	FALSE	0.55100655555725	4.25435383378127	0.7564731387441	1.37289317361942	0.7497139345236	1.36062616127206	3.3952231565651	1514746859.8409	1.6190190315247	2.0970866249594	0.74723378687989	0.62028367870389	0.383123154593027	0	11.041298761471	507.503372272384	52.850026462731	51.9097995666755	612.263198301791	0.07035	0.05831	0.23875	42	1	0.04969	21.21783	19.81434	1.00688	655.63105
122199	4938013	3	8	NO	5.77	14.4	3.2889774463696	8.4916353766734	6.581000153039	1517436458.2133	FALSE	0.77486658096313	4.24457258471713	0.96723397436774	1.24825873012294	1.3709667001314	1.76929388079602	2.6913319266171	1517436456.4066	1.8066942691803	1.4896443590526	1.3642042314974	0.73615655585356	0.407460503091957	0.73460106423909	5.9662432525175	359.22742267465	31.06781978621060	62.4168006648295	452.71204312569	0.16530	0.13116	0.21503	19	1	0.02259	15.31094	14.65088	0.74868	473.10799
119055	4806871	3	8	NO	5.37	10.6	2.4719647524586	5.8707033250718	5.1187521091231	1514746863.4359	FALSE	0.58300685882568	4.24002687967985	0.39213190344445	0.67260255605620	0.61346020137104	1.05223496445085	2.6265957161783	1514746862.0109	1.4250168800354	1.8432032300649	0.61249394911818	0.76750605877704	0.538594363007106	0	9.4857671449365	476.42225382866	11.98869320262310	29.34136251816160	517.752309549445	0.23511	0.21634	0.21362	37	3	0.04032	18.04958	16.75574	0.79259	557.73190
126341	5106517	3	8	NO	5.12	8.2	2.8737705256021	7.622137523471	3.9228725942756	1521153449.3951	FALSE	0.68000721931458	4.22608825903164	0.97365586163666	1.43183165410812	0.52924452011658	0.77829250202672	1.7984905145228	1521153448.4771	0.91800975799561	1.95911916933175	0.27253992892839	0.73814674941044	0.80407287937997	0	7.7012771178064	405.78135297286	46.57993508669580	13.76260525368890	466.123893313245	0.42035	0.36593	0.24676	65	11	0.05394	17.52753	15.08492	0.67379	541.60057
126341	5106524	3	8	NO	5.12	8.2	2.5579792471081	6.2558912900287	6.9473913222306	1521154237.0405	FALSE	0.61500644683838	4.15927224870266	1.0654227951555	1.73237662894855	0.55518776290884	0.90273486686675	1.3612197225669	1521154236.2735	0.76700830459595	1.77471314770702	0.55311246651879	0.53091434218263	0.69218851869187	0	8.707293153203	434.593785957715	75.3934206044663	20.47242312745770	530.459629689639	0.13794	0.11301	0.25398	63	10	0.04365	19.53249	17.16698	0.64937	603.55389
126591	5116775	3	8	NO	5.47	9.7	3.1196388321723	7.8621104848356	4.532821438442	1521393639.9708	FALSE	0.75601768493652	4.12640986359234	0.94420416374507	1.24891809088348	0.78365394612789	1.03655504592289	1.4761845553075	1521393639.2908	0.680016040802	2.17080843205774	0.78042527614847	0.82833909016743	1.21811698616771	0	6.5837348875796	347.969560686176	31.87604579256010	21.95741798456680	401.803024463303	0.30173	0.26130	0.20719	107	34	0.06530	17.55927	13.00333	0.53145	542.58143
119055	4806871	3	8	NO	5.37	10.6	3.1496606892646	8.2949548072335	9.4748549385929	1514746859.0738	FALSE	0.76700901985168	4.10641936110955	1.138052275608	1.48375344507431	0.61546462891808	0.80242163128290	1.4157074049436	1514746858.4148	0.65900778770447	2.14824078160738	0.61015301528389	0.7134345418042	1.08258893918282	2.2317523041236	5.8008405072473	339.66798144824	44.3456978142474	12.96979966499230	396.98347892748	0.06922	0.05923	0.21549	108	27	0.06328	17.23801	12.84736	0.53756	532.65438
130363	5275462	3	8	NO	5.9	5	3.0835645331494	8.1307911096607	8.6638630585984	1523538078.5924	FALSE	0.75603604316711	4.07859461333621	1.0938198921842	1.44678273221218	0.63143419148497	0.83519059334768	2.0055995713241	1523538077.7183	0.87404155731201	2.29462724574794	0.49523429215625	0.81945033485318	0.93754161686921	0.50646859526611	8.8641837677298	339.943753913317	42.7752559274006	14.25467013496870	396.973679975686	0.08160	0.06988	0.17596	93	16	0.05565	16.36192	12.84704	0.48317	505.58340
130360	5275436	3	8	NO	5.93	8.9	2.456624858257	6.0594030878551	6.9096363636903	1523350695.6256	FALSE	0.60501074790955	4.06046482107169	1.2819477778591	2.11888430459876	0.45800768786324	0.75702405196232	1.5929391616971	1523350694.9236	0.70201253890991	2.26910357494558	0.4557913638353	0.67549108616688	0.96222082758776	0.09284905558545	8.0817582636897	421.033738459992	114.651537178673	14.63473119477150	550.320006833437	0.14232	0.10889	0.19323	113	20	0.05447	22.13634	17.80971	0.51885	684.01294
126590	5116758	3	8	NO	5.64	10.4	2.841095509868	7.1544091956515	5.9712769413835	1521318762.4843	FALSE	0.70200872421265	4.04709430506648	0.93699584211049	1.33473532421038	0.63025067401804	0.89778182561037	1.6216833733012	1521318761.1563	1.3280169963837	1.2211314898207	0.62512949392041	0.70988789327728	0.534547295110201	0	7.6502398285621	360.472902294323	39.20814387293850	17.73893708057460	417.419983247836	0.16772	0.14484	0.18800	17	3	0.01761	14.17774	13.50874	0.57058	438.09227
126902	5130382	3	8	NO	7.7	32.7	3.3131358352448	8.4942612152996	6.6282345842386	1521748524.7961	FALSE	0.82100391387939	4.03546899014116	1.4871528217633	1.81138335228664	0.49324659473279	0.60078470564423	2.1518557460576	1521748523.4681	1.3280065059662	1.6203653644694	0.42967339522877	0.90666710950995	0.682727912428635	0	10.344180418527	306.458227286236	61.745313535239	6.79236464273518	374.99590546421	0.14301	0.11688	0.10597	31	5	0.01644	13.29983	12.13579	0.30399	410.96469
146097	5934989	3	8	NO	7.44	37.6	2.51058922436804	6.08316722235021	8.65500766570239	1538254430.47447	FALSE	0.627002716064453	4.00411219926831	1.34777305811999	2.1495489949065	0.367102805944983	0.585488382329825	1.67204275986543	1538254429.58946	0.885004043579102	1.88930522068963	0.303165495669232	1.01067027478089	1.14199509269311	0.577234531894392	10.4409872622396	395.067713018367	113.855432823821	8.446866405173490	517.370012247361	0.08838	0.06749	0.11960	62	23	0.02776	19.49682	16.74337	0.33584	602.45159
130395	5276853	3	8	NO	6.089	5	3.09145788236966	7.93188942210845	6.85873746345445	1523907224.27818	FALSE	0.772513389587402	4.00181786366292	1.21094416846146	1.56753809679367	0.819951516413501	1.061407514051550	2.20558673336293	1523907223.55836	0.719819307327271	3.06408387620554	0.813060867236656	1.01016895382455	1.40336462712478	1.94026226900932	5.34897427487192	320.285372836571	49.142661918098	22.531327686722700	391.959362441392	0.13136	0.10734	0.16667	202	42	0.09659	20.57428	12.68477	0.52223	635.74520
126341	5106518	3	8	NO	5.12	8.2	4.0521771514533	9.0163403058627	8.0854901494235	1521153569.3864	FALSE	1.0150108337402	3.9922501482290	1.4943686857078	1.4722687049568	0.452637215577	0.445943235806738	1.1487940383242	1521153568.8574	0.52900576591492	2.1716096729822	0.39597917059577	0.39992199045115	0.75598796122663	0	7.8869934608784	242.6013970154870	32.9937718825539	3.02703169030015	278.622200588341	0.08828	0.07687	0.22017	138	17	0.06360	14.01439	9.01690	0.52053	433.04477
125540	5073564	3	8	NO	7.57	34.1	3.1760304758998	8.2748843843801	8.6321191264614	1520381542.2965	FALSE	0.79900598526001	3.97497707713199	1.3098688694705	1.63937303804332	0.62402175417456	0.78099759662187	2.0517151580323	1520381540.5695	1.7270126342773	1.1880139828224	0.61495377552321	0.8050510881963	0.4661524022569	0	12.672151800544	305.52567215139	51.9677635900026	11.79445413858640	369.287889879979	0.08081	0.06686	0.10508	13	2	0.00896	12.42259	11.95106	0.34532	383.85816
126341	5106523	3	8	NO	5.12	8.2	2.4140613295774	5.0406300381048	4.5491331446767	1521154070.4368	FALSE	0.61600637435913	3.91889017721432	1.0115342638092	1.64208408534987	0.53414046324642	0.86710216887304	1.4172139690054	1521154069.8108	0.62600684165955	2.26389533578955	0.53106559101704	0.71176081525942	1.13698568113495	0	2.490209470915	385.185086213332	67.6291706530521	18.85748724291870	471.671744109303	0.28653	0.23399	0.22620	126	32	0.07720	20.39057	15.26446	0.60923	630.06851
146097	5934994	3	8	NO	7.44	37.6	2.71703448194373	6.88109243489825	8.93256036684586	1538253740.11171	FALSE	0.702007532119751	3.87037796266871	1.64886011907921	2.34877838717825	0.743311786617916	1.058837338074490	0.961741610817427	1538253739.75571	0.356003761291504	2.701492836279140	0.721713157700787	0.341979185094503	0.960605539261375	0.25282773224288	8.60923862025561	329.680658009599	121.414567140327	24.674320806832100	475.769545956758	0.08543	0.05920	0.12314	317	40	0.04683	26.94306	15.39707	0.32475	832.54041
126341	5106514	3	8	NO	5.12	8.2	1.919544912984	2.7775526769625	7.8060713425661	1521152697.2791	FALSE	0.49600529670715	3.87000890056489	1.1400468678644	2.29845704356964	0.97629798931326	1.96832170098716	1.6883667553607	1521152696.5881	0.69100737571716	2.44334114901224	0.96434783306466	0.62875829243096	0.90991545752808	1.2142215004237	6.8080882075814	466.515520889879	164.556466252263	120.67973027585600	751.751717417998	0.12488	0.07750	0.29029	133	19	0.08176	29.24734	24.32853	0.83515	903.74282
119735	4837557	3	8	NO	6.97	21.2	3.4129948894731	8.4519179851485	7.8266934103626	1515262488.9736	FALSE	0.8860239982605	3.8520343649537	1.2143629452483	1.3705756815080	0.39161721532867	0.441993914496129	1.6090118080771	1515262488.2506	0.72301959991455	2.22540551911354	0.32387494903214	0.79360846315363	1.09763063580492	0.67023787577676	8.5027563176628	258.7398395740870	32.7558627108609	3.40655635953778	294.902258644486	0.08705	0.07638	0.10976	106	26	0.03996	13.80175	9.54376	0.28827	426.47420
119056	4806883	3	8	NO	5.14	11.5	2.3555131797562	4.4849152486998	5.7483679605881	1514764025.365	FALSE	0.61500811576843	3.83005218851961	1.1316463573632	1.84005109582863	0.43629297777301	0.70941011441431	1.9440245835616	1514764023.615	1.750022649765	1.11085681309476	0.43268988869829	0.67231300924471	0.384173890169359	0.65783324957818	6.0987523678609	368.516570084008	85.0564794245182	12.64277442335820	466.215823931884	0.17709	0.13998	0.22149	11	1	0.01649	15.48263	15.08789	0.87401	478.41315
126590	5116758	3	8	NO	5.64	10.4	3.1167273787415	7.6545520935373	6.4225602608303	1521318758.6733	FALSE	0.8200101852417	3.8008398369135	0.89913352455342	1.09649067869614	0.54338269254505	0.662653589339121	0.6095779661779	1521318758.3923	0.28100371360779	2.1692879369869	0.54251349822079	0.41196197951998	1.46603749192786	0	7.2822414279814	272.1876246962550	22.6526557537185	8.27336808105553	303.113648531029	0.12297	0.11043	0.15947	259	118	0.06795	22.00699	9.80950	0.48035	680.01588
126340	5106498	3	8	NO	6.62	38.6	2.5687816060331	6.3152266813702	5.1607193068745	1520998833.3624	FALSE	0.6810131072998	3.7720002427240	1.5706142271995	2.3062907458961	0.80213805487578	1.17785993584799	2.0384037097973	1520998832.4454	0.91701793670654	2.22286132931947	0.79532741702771	0.88105187139008	0.96077932189022	0	7.1433163856009	322.7872984152140	120.6705037543240	31.4746067442654	474.932408913803	0.24784	0.16844	0.15062	83	16	0.04219	18.56742	15.36998	0.42696	573.73313
126341	5106517	3	8	NO	5.12	8.2	2.397791514531	4.0488798777269	7.2149098064613	1521153461.4343	FALSE	0.63700675964355	3.76415395634535	0.96173379814998	1.50977016113320	0.56923032507145	0.89360170273542	0.35265168830355	1521153461.1313	0.30300331115723	1.16385423960122	0.56822904545128	0.21865718656178	0.72163299380025	0.083672184366812	5.5697554640374	343.652255718184	55.28484781571310	19.36744887179450	418.304552405692	0.10447	0.08582	0.20744	69	27	0.02256	16.63190	13.53736	0.37609	513.92579
122199	4938016	3	8	NO	5.77	14.4	3.1880596288172	7.7655809033549	9.3395386941174	1517437605.6574	FALSE	0.84956479072571	3.75257974861919	0.86241110362485	1.01512105143643	0.4551999009777	0.535803632573876	2.8570375975592	1517437603.8935	1.7638673782349	1.6197576035553	0.45238159417477	0.55886155480326	0.316838761065195	4.6563048109579	5.2548608576868	256.0895396886	18.73991630411440	5.22087488596047	280.050330878675	0.05567	0.05090	0.14584	23	1	0.02580	9.83528	9.06312	0.48687	303.91030
130363	5275463	3	8	NO	5.9	5	2.5483394382718	5.5797063830278	7.8780358964565	1523538193.7159	FALSE	0.69103288650513	3.68772527044251	1.4533206157186	2.10311353352329	0.98705387891882	1.42837468113971	2.3187643662819	1523538192.8628	0.85304069519043	2.71823417025171	0.98374896918342	0.82686191543435	0.96931121820603	0	8.9664171320844	304.051315224868	98.8906436995238	45.61566962262810	448.55762854702	0.10193	0.06909	0.18173	134	17	0.07544	19.39800	14.51643	0.54260	599.39824
146087	5934783	3	8	NO	4.91	5.7	1.97165252428178	2.66014582823161	4.34230926352099	1537654853.5348	FALSE	0.540004968643188	3.65117478314271	0.945178412117351	1.750314287833680	0.847566996708044	1.569554070655380	2.26347271268634	1537654852.7038	0.831007719039917	2.72376857738624	0.843703658451739	0.869762486001488	1.046635868805580	0	8.56560956466158	381.413424319114	87.652196533739300	70.482823144414200	539.548443997268	0.31535	0.22292	0.24664	138	20	0.11136	22.58403	17.46111	0.80992	697.84648
126590	5116764	3	8	NO	5.64	10.4	3.1828403170596	7.8537734516279	5.6547232285566	1521319624.0132	FALSE	0.87401103973389	3.64164772796083	1.3808359267319	1.57988385038285	0.46221409497055	0.52884239896018	1.4800959408417	1521319623.3862	0.62700796127319	2.36056961356	0.460127914957	0.54133287505669	0.86335885425995	1.0895606562955	6.5068998379843	234.426892204211	44.1226801477986	4.94383649056313	283.493408842573	0.15814	0.13077	0.15897	137	18	0.06262	14.21250	9.17454	0.42292	439.16626
120454	4866364	3	8	NO	6.2	20.4	1.5355309607573	1.5064766774043	6.6266143380731	1515551094.6916	TRUE	0.42200493812561	3.63865638060436	0.93818647745988	2.22316469003173	0.73276685138071	1.73639402096902	1.7050214474708	1515551094.0446	0.64700746536255	2.63524230978601	0.7339295265219	0.43918075094158	0.67878776436604	1.1522728744326	5.5486546435013	484.722344400759	180.94818151128100	110.38435245801500	776.054878370055	0.15221	0.09507	0.17387	166	11	0.06074	30.83774	25.11504	0.54081	952.88620
146087	5934777	3	8	NO	4.91	5.7	2.53827479686796	5.00310680434041	5.02584376477685	1537653748.18844	FALSE	0.702006578445435	3.6157421807768	0.813804933845976	1.159255424141630	0.39782571335677	0.566697984850425	1.73638093224713	1537653747.47543	0.713006734848022	2.43529387224826	0.394346355390437	0.814004789820505	1.141650913008570	0	7.99194643308231	287.72805719008	29.576417979281800	7.06790394216191	324.372379111524	0.18398	0.16320	0.19276	129	28	0.09461	15.57039	10.49749	0.57631	481.12497
126341	5106515	3	8	NO	5.12	8.2	2.0755210116275	3.3647868334987	7.8061569217816	1521152807.2823	FALSE	0.58300638198853	3.56003137486809	1.5143073995751	2.5974113600782	0.99057875975838	1.69908733482418	1.5776477340084	1521152806.2133	1.0690114498138	1.4758005952913	0.97885112702868	0.5719095415832	0.5349891637576	0.50431272302867	7.4239483212725	335.863512691445	178.787291906623	76.50442936041230	591.15523395848	0.11543	0.06558	0.26831	31	4	0.02964	20.28380	19.13124	0.80610	626.76935
119055	4806879	3	8	NO	5.37	10.6	2.7877436973643	6.877181913113	6.9739955854563	1514748962.7667	FALSE	0.78800940513611	3.53770358474691	1.6458558085986	2.08862457461953	1.3031085052626	1.65367125921234	1.2872520497797	1514748961.9676	0.79900932312012	1.61106011223123	1.2833672993555	0.49280208110173	0.61676637160796	0	8.592150813602	245.380454264575	85.5298774893363	53.616127057483	384.526458811394	0.12714	0.08114	0.21444	50	7	0.03254	14.30648	12.44422	0.49651	442.07008
130363	5275464	3	8	NO	5.9	5	2.4833979233018	5.5025169046121	6.7153899779131	1523538309.6474	FALSE	0.70203351974487	3.53743497063261	1.1664482057077	1.66152779447284	0.97837892537849	1.39363562830169	1.7638054006693	1523538308.4813	1.1660556793213	1.5126253676805	0.97007998636922	0.97091320454065	0.832647378473186	0	10.344833269184	275.389618745317	60.7555359577415	42.74340503996910	378.888559743028	0.12037	0.08749	0.15594	30	9	0.02700	13.54015	12.26177	0.45823	418.39067
119056	4806885	3	8	NO	5.14	11.5	3.2796598350352	7.947239029201	6.2259119471295	1514764403.938	FALSE	0.93901228904724	3.49266976938382	0.88302917221611	0.94038084753083	0.32836082516951	0.34968746309239	1.1800238542139	1514764403.355	0.58300757408142	2.0240283431534	0.32714023027108	0.58130098431518	0.99707278285547	0	7.3996779784584	200.711500712978	14.55005913946670	2.01195068959812	217.273510542043	0.10742	0.09923	0.15760	109	26	0.06076	11.39752	7.03151	0.41406	352.18351
126902	5130378	3	8	NO	7.7	32.7	2.6670665457897	5.6342498125737	7.6227947760153	1521747260.04	FALSE	0.76700377464294	3.4772534816159	1.0524517328677	1.3721597828611	0.65197640346456	0.85003024107420	1.5542934727767	1521747259.328	0.71200323104858	2.18298654415889	0.6465713993731	0.97152225423189	1.36449135603094	0	8.5085780473039	243.558720447038	37.9262894376614	14.55458195253360	296.039591837233	0.07975	0.06561	0.07816	103	40	0.03524	14.23453	9.58057	0.22392	439.84691
119055	4806882	3	8	NO	5.37	10.6	2.4372533364352	4.5328149798129	8.6042137888165	1514749629.3655	FALSE	0.70200824737549	3.47183006118098	1.530407837741	2.18004253292257	0.74541639042329	1.06183423515334	1.2527811028193	1514749628.8805	0.48500561714172	2.58302390434632	0.73882741387882	0.56528872297821	1.16553025985477	0.18573101102531	8.1746539799854	265.279193072447	104.596271347515	24.81416790131010	394.689632321272	0.07638	0.05134	0.19609	213	43	0.08781	21.05187	12.77313	0.54646	650.50278
130363	5275465	3	8	NO	5.9	5	3.821879247857	8.7825907962113	6.8314531350347	1523538463.5818	FALSE	1.1010525226593	3.47111438301441	1.544843291077	1.40306048919977	0.63163286119429	0.57366278919079	1.430398248701	1523538463.1277	0.454021692276	3.150506403186	0.63009908324296	0.56138414091711	1.23646986579629	0.23857787607274	8.3932468725793	169.066786411723	27.6231522572632	4.61778605376449	201.307724722751	0.09693	0.08140	0.12995	338	52	0.10375	19.12935	6.51481	0.53890	591.09697
122199	4938016	3	8	NO	5.77	14.4	3.1255972602331	7.6593388554316	6.4121757009594	1517437602.9901	FALSE	0.90334701538086	3.46001836173147	0.9825947017063	1.08772673731814	0.49286444514578	0.54559813311387	1.6916748797257	1517437602.3019	0.68821716308594	2.45805389702909	0.49030954289183	0.77902993339449	1.13195365529879	1.1440812136001	7.0504249976724	204.753190061059	20.2354784702855	5.09119370500915	230.079862236354	0.10316	0.09181	0.12740	136	29	0.06936	12.76647	7.44595	0.38486	394.48397
121170	4896277	3	8	NO	6.34	34.9	2.6911605847964	6.2653912183242	8.2115189081269	1516646634.9021	FALSE	0.77800512313843	3.45905252389651	1.2538842768806	1.61166583559566	0.64796521098588	0.83285468400520	1.5149285875706	1516646633.898	1.0040068626404	1.5088827018438	0.10372027356824	0.88619470352168	0.88265801410073	0	12.265513883088	237.607606828848	51.581744561064	13.77477431371010	302.964125703622	0.07134	0.05595	0.11967	35	12	0.02397	11.32647	9.80466	0.31666	349.98801
119056	4806893	3	8	NO	5.14	11.5	2.5697158190671	4.3687551933883	7.2024058749078	1514766870.5101	FALSE	0.74500966072083	3.44923825092521	0.88253233682348	1.18459180243326	0.94732004101881	1.27155403609429	1.2486015872819	1514766869.9921	0.51800680160522	2.41039612494022	0.94469361136696	0.67433626770152	1.30179037343112	0.17241641972866	8.714446653597	246.724891496142	29.10073949535220	33.53020593916070	309.355836930655	0.09067	0.07231	0.17803	173	51	0.08956	17.25531	10.01152	0.52020	533.18903
126590	5116761	3	8	NO	5.64	10.4	3.0131333144393	7.2773666684592	7.1028795209968	1521319290.714	FALSE	0.87501120567322	3.44353683118954	1.550977802425	1.7725233601228	0.51906734297689	0.59321222358236	1.7249609720636	1521319290.002	0.71200895309448	2.42266753046672	0.51459265809817	0.5807890699204	0.815704728706315	0.027681358445234	8.7970450190235	209.374763531079	55.4751907129575	6.21348210383570	271.063436347872	0.09594	0.07411	0.15217	127	14	0.06477	13.36119	8.77228	0.42037	412.86080
126590	5116761	3	8	NO	5.64	10.4	2.8800271662666	7.0818737376977	5.3639935222393	1521319298.1541	FALSE	0.84201073646545	3.42041620319027	1.1618842146234	1.3798923984042	0.58346454006052	0.69294192436282	1.2848106871237	1521319297.1501	1.0040125846863	1.2796758792871	0.58215889540429	0.5031070092719	0.5010963178605	1.749651558282	4.587962818288	214.668719018746	34.9382621356167	8.81058063342386	258.417561787787	0.15434	0.12821	0.13960	25	4	0.01872	9.30359	8.36303	0.34048	287.48086
126903	5130393	3	8	NO	7.68	32.7	2.8209367028801	6.3075705742374	7.9978167601493	1521757195.5115	FALSE	0.83099865913391	3.39463448210634	1.1169884742511	1.34415195737531	0.49375797857455	0.59417421814995	1.493811301918	1521757194.9395	0.57199907302856	2.61156245238078	0.49039038899426	0.61163791616057	1.06929878910841	0.46871022611404	7.5808367084247	214.246727741216	33.5911520180589	6.56380646760346	254.401686226878	0.06745	0.05680	0.07315	184	31	0.04257	15.19432	8.23306	0.22792	469.50434
126590	5116753	3	8	NO	5.64	10.4	3.4385404957859	8.2742380833022	6.9799133681148	1521317693.0738	FALSE	1.02601313591	3.35136108441356	1.0547018017797	1.02796130465158	0.41884563665018	0.408226388133612	1.6576685701246	1521317692.2108	0.8630108833313	1.9207968313515	0.37876266463314	0.76856109420554	0.890557823835112	2.8549864253911	7.5448076597685	169.128971356757	15.9121585155653	2.50944517394653	187.550575046269	0.08061	0.07269	0.12346	66	14	0.04443	8.66664	6.06960	0.32456	267.79922
126341	5106504	3	8	NO	5.12	8.2	3.0023452577829	7.2403076143032	7.9226255153356	1521151010.0391	FALSE	0.89600944519043	3.35079643847371	1.1684946248047	1.30410971790187	0.42501247128206	0.47433927573356	1.703957732847	1521151009.3261	0.71300768852234	2.38981677235253	0.42302629687068	0.6637306373827	0.930888471565064	0.87263770397306	6.8850940738072	193.602957044603	29.3254144320473	3.87966358283127	226.808035059482	0.06607	0.05640	0.15821	124	19	0.07912	11.95276	7.34007	0.46265	369.34039
126591	5116776	3	8	NO	5.47	9.7	3.7620449722634	8.772342753508	10.393506838832	1521393911.8602	FALSE	1.1230261325836	3.3499175692453	1.5172531394967	1.3510399228254	0.5791994067388	0.5157488235882	1.7371097730936	1521393911.1362	0.72401714324951	2.39926607993999	0.57551865012609	0.71909706099312	0.99320446718387	0.1841481534385	10.41287970069	154.3856258149010	25.1116347791701	3.6594440666304	183.1567046607010	0.03886	0.03275	0.14029	123	21	0.07106	10.58401	5.92740	0.41202	327.04599
121170	4896306	3	8	NO	6.34	34.9	2.6123293936715	6.0109189728821	7.391902815346	1516649096.2139	FALSE	0.78800463676453	3.31511931756832	1.463601596221	1.85735150268964	0.57804057208032	0.73354970911554	1.9071426397776	1516649095.3069	0.90700554847717	2.10268023495515	0.5132567887532	0.89031304908871	0.98159603387599	0.13633389781057	11.521412685444	215.475570401788	67.6375571329578	10.55015424702540	293.663281781771	0.08643	0.06342	0.11749	75	16	0.04224	12.47211	9.50367	0.33166	385.38828
130363	5275463	3	8	NO	5.9	5	2.3239911987305	4.0308067838766	7.2309620174728	1523538191.0377	FALSE	0.70203351974487	3.31037070648005	1.90282271593	2.71044424861866	1.0392208779455	1.48030093822752	1.8630468233408	1523538190.2057	0.83203959465027	2.23913241066838	1.0294280782472	0.83310589869186	1.00128155444578	0	9.6981014828068	241.17033994729	161.678247251627	48.2248253880179	451.073412586935	0.12360	0.06608	0.18565	93	19	0.05449	18.21323	14.59785	0.50616	562.78866
119055	4806869	3	8	NO	5.37	10.6	2.1777471003969	3.2218907980983	6.668255059621	1514746463.9312	FALSE	0.65900778770447	3.304584772788	1.277631476032	1.93871984499969	0.47802799777044	0.72537533954729	1.3455206935622	1514746463.3162	0.6150074005127	2.1878121993988	0.47528931631008	0.58936569121297	0.95830666545093	0.64126171849025	6.8392213640456	256.018725711994	88.1186933314422	12.33569181195520	356.473110855391	0.10782	0.07744	0.16625	120	23	0.06238	16.17440	11.53635	0.45063	499.78895
126590	5116761	3	8	NO	5.64	10.4	3.3659376744062	8.1399087984644	7.0511897164244	1521319293.651	FALSE	1.0260128974915	3.2805997689070	1.2701936854693	1.2379899790488	0.54899188676554	0.535073085443439	1.7929005067838	1521319292.895	0.75600957870483	2.37153146902627	0.54730521278135	0.6921524130124	0.915533919819074	0.29508606169239	7.5348075592451	162.0623617329860	23.0786245630760	4.31123678401008	189.452223080072	0.07979	0.06825	0.12471	115	17	0.06406	10.40514	6.13114	0.36759	321.51870
126341	5106530	3	8	NO	5.12	8.2	1.9091702784577	2.1094259767502	5.2191791677581	1521154885.5745	FALSE	0.58300614356995	3.27470010310215	0.88457430861989	1.51726412899070	0.77276591942226	1.32548503638460	1.7451799023546	1521154884.7315	0.84300899505615	2.07017945548536	0.77074462717664	0.52304558220322	0.62045077249547	0.74704581302823	6.0301372532087	284.183212562229	61.00672805219940	46.55914656530750	391.749087179736	0.17111	0.12413	0.17781	79	7	0.05618	15.44816	12.67796	0.52994	477.34818
126341	5106517	3	8	NO	5.12	8.2	2.3964176561837	3.4478107300314	5.2237384352477	1521153457.1692	FALSE	0.73400783538818	3.264839339101	0.65841230328889	0.89700991126435	0.55316326824622	0.75362038601901	1.1229826355953	1521153456.6292	0.54000568389893	2.0795755842553	0.40047820263396	0.5229917411731	0.968493030290003	0	5.5035153955422	224.363092424745	16.93644558771050	11.95454534557080	253.254083358026	0.13903	0.12317	0.14472	124	27	0.06330	13.06866	8.19593	0.40052	403.82171
122199	4938016	3	8	NO	5.77	14.4	1.9907572099098	2.3209409189343	6.6579637756363	1517437608.7977	FALSE	0.61252331733704	3.25009212476133	0.46159311309229	0.75359272051728	0.80118394654378	1.30800562830317	1.5520622998584	1517437608.217	0.5806519985199	2.6729647083187	0.79727060572293	0.47346421099371	0.815400984067195	0	4.993115714251	266.438635299299	14.32449259104550	43.15440005723040	323.917527947575	0.09134	0.07513	0.12162	190	18	0.07396	17.20764	10.48277	0.38890	531.71603
126341	5106515	3	8	NO	5.12	8.2	3.7489044042158	8.6564932966675	7.196817112169	1521152802.7372	FALSE	1.1550123691559	3.2457699192915	0.95096946458944	0.823341368443026	0.38510608300944	0.333421609407422	1.389187176451	1521152802.1322	0.60500645637512	2.2961526473193	0.37433440925224	0.60705714126505	1.00338952562956	1.4646173156853	6.7660473556571	140.9215173337510	9.06779560858208	1.48706288910282	151.476375831436	0.06894	0.06413	0.13621	135	26	0.07552	10.09144	4.90215	0.42726	311.82543
126590	5116763	3	8	NO	5.64	10.4	2.5514984022891	4.3938859693711	6.1060100582846	1521319433.5868	FALSE	0.7890100479126	3.2337970968042	0.68428205542129	0.867266592144957	0.88526481371997	1.1219943472989	2.129848499123	1521319432.6908	0.89601135253906	2.37703293946842	0.88165283178177	0.73815633278815	0.82382475478286	1.0815149440059	6.7423041036611	204.7724297370040	14.7282512590777	24.6505882579476	244.151269254029	0.10545	0.08844	0.12359	97	12	0.06273	11.43308	7.90134	0.38192	353.28229
126902	5130382	3	8	NO	7.7	32.7	2.8573270201444	6.8926660100965	8.4369855524702	1521748520.9101	FALSE	0.88500428199768	3.22860248053793	1.3337864613058	1.5070960541514	0.42810391803939	0.48373090023141	1.4444664936154	1521748520.1861	0.7240035533905	1.9951096743255	0.42681285200215	0.84891924552775	1.17253463957776	0	10.509306522673	181.975224556324	39.6519890274047	4.08498788519674	225.712201468925	0.05727	0.04617	0.06876	85	29	0.02848	11.00300	7.30460	0.18830	339.99256
126341	5106508	3	8	NO	5.12	8.2	3.5539139451226	8.3208560819933	7.7672149074577	1521151452.6108	FALSE	1.1010117530823	3.2278619507679	0.96886954514125	0.879981110491222	0.45303910902772	0.411475270594914	1.7542334806695	1521151451.6388	0.97201037406921	1.80474769351031	0.44844037321527	0.69983114645417	0.71998320709727	0.48911931174649	7.7661351228937	146.2064168665960	10.8663384641415	2.37587729793458	159.448632628672	0.05939	0.05445	0.13667	52	8	0.04541	7.10225	5.16015	0.35418	219.45964
121170	4896277	3	8	NO	6.34	34.9	2.1557150658691	3.2999227679374	6.0933921802347	1516646639.0381	FALSE	0.66900444030762	3.22227318084446	1.7102260178976	2.55637468880058	0.90335115902897	1.35029172394371	1.4261174993732	1516646638.0231	1.0150067806244	1.4050324850992	0.74327757925708	0.63858047387721	0.629139121104566	0	10.562055843862	239.786206365797	150.920592386458	42.10703828243340	432.813837034688	0.15915	0.08817	0.14701	30	6	0.01859	15.17437	14.00692	0.40090	468.88794
125540	5073563	3	8	NO	7.57	34.1	2.4230233346887	4.5788271030025	9.1477908628599	1520380908.2379	FALSE	0.75600552558899	3.20503389548769	1.5951434379224	2.10996267081468	0.87752336023065	1.16073670168877	1.6566133057287	1520380907.4929	0.7450053691864	2.2236259955252	0.87316559484313	0.75852971806863	1.01815335760197	0	10.927913474825	209.927226347693	90.9814926847105	27.53410393962910	328.442822972033	0.06056	0.03870	0.08843	103	21	0.03291	14.64338	10.62922	0.24188	452.48052
126590	5116772	3	8	NO	5.64	10.4	1.962987656376	2.2293523730303	10.024542964442	1521321503.519	FALSE	0.61600780487061	3.18662789798307	0.48168536992213	0.78194686189618	0.68858170508309	1.11781328034914	2.0154781210949	1521321501.932	1.5870199203491	1.2699765738615	0.68385810010913	1.0856747864208	0.6840965084937	2.6509209712418	10.676293696186	254.685943870639	15.33545800949190	31.33868715884970	301.360089038981	0.03770	0.03186	0.11910	16	5	0.02063	10.40833	9.75275	0.45457	321.61743
119056	4806892	3	8	NO	5.14	11.5	2.9575406315374	6.4852129744038	6.3785800590927	1514766415.8902	FALSE	0.92901206016541	3.18353308676188	0.88229120155615	0.94970909354940	0.33810786723736	0.36394346396016	1.2901122992209	1514766415.2642	0.62600803375244	2.06085581919398	0.34186749740203	0.4152251844009	0.663290504295835	0.85276516683017	6.1495423449823	168.548878688683	14.99989865162980	2.20279955704459	185.751576897357	0.08656	0.07854	0.13330	105	11	0.05594	9.75500	6.01138	0.36208	301.42965
126341	5106504	3	8	NO	5.12	8.2	2.8022829506943	5.3976240097824	5.8068022201132	1521151019.7452	FALSE	0.88600945472717	3.16281382297124	1.0179112270429	1.14887174353726	0.48572247032361	0.54821364233994	1.6594172898671	1521151018.5472	1.1980128288269	1.3851415026098	0.48428795452463	0.58003941753071	0.484167951772843	0.093846763355828	6.2759084767092	174.436507909174	23.0161788512166	5.24070609955927	202.69339285995	0.10869	0.09354	0.13981	25	3	0.02590	7.45824	6.55966	0.37391	230.45971
119055	4806878	3	8	NO	5.37	10.6	2.0077018876006	2.2620950289498	5.9337478370438	1514748207.9898	FALSE	0.63700747489929	3.1517713162126	0.50372785874457	0.79077228854215	0.50951827607237	0.79986231896717	2.7261618123501	1514748206.8557	1.1340134143829	2.4039943247352	0.50380925032626	0.84515069391262	0.745273982823676	2.4433469040367	5.994600063191	240.931371430354	15.16655130611640	15.51723834842360	271.615161084894	0.10029	0.08896	0.12245	79	8	0.06926	11.58314	8.79013	0.44860	357.91918
126341	5106504	3	8	NO	5.12	8.2	2.9428088494672	6.712626414643	7.116226498371	1521151012.5001	FALSE	0.94001007080078	3.13061417199527	1.0918670216888	1.16154821698735	0.39082770386891	0.41576969865437	1.1742247336348	1521151011.9391	0.56100583076477	2.09307046244793	0.38669446527506	0.51087342585399	0.91063835318353	0	6.9296181992021	161.084988772221	22.175348935585	2.84119895817242	186.101536665978	0.07050	0.06102	0.13619	121	23	0.06267	10.66633	6.02270	0.38514	329.58968
126902	5130381	3	8	NO	7.7	32.7	3.3094439062593	8.0514171908766	8.7156194046916	1521747925.1062	FALSE	1.0580050945282	3.1280037528884	1.4062707552754	1.3291720073451	0.51576568809111	0.48748885119604	1.3980040270658	1521747924.3072	0.7990038394928	1.7496837411360	0.44173795826148	0.86299679645516	1.08009092547413	0	11.190883520538	142.8812548429280	25.7990133687578	3.47032461432713	172.150592826013	0.04893	0.04061	0.06269	59	23	0.02248	8.21700	5.57122	0.16230	253.90544
126590	5116752	3	8	NO	5.64	10.4	2.5025871156398	3.7201316227842	5.2064835770025	1521317614.9428	FALSE	0.81001019477844	3.08957483717143	0.83935816778571	1.03623160942474	0.45910916073799	0.56679429925394	1.5178205850224	1521317614.0368	0.9060115814209	1.6752772438538	0.43772403148373	0.69313051478195	0.765034938841413	0.39240141274306	8.2486685445255	182.068761321084	20.48102420102200	6.12757937733002	208.677364899436	0.12726	0.11103	0.10845	48	10	0.03362	8.62516	6.75331	0.29342	266.51747
119735	4837559	3	8	NO	6.97	21.2	2.33218503659	3.4339137034606	7.5376959682801	1515263543.7461	FALSE	0.75602054595947	3.08481700537677	1.3530942646034	1.78975858769312	0.80285932548802	1.06195437383134	2.1068346867665	1515263542.4931	1.2530338764191	1.6813868534723	0.79732125080525	0.88263977512455	0.704402164805746	2.8939342590851	9.7235138938525	194.470485380572	65.4611748434834	23.04658605650080	282.978246280556	0.07684	0.05281	0.08987	35	6	0.02157	10.48395	9.15787	0.27341	323.95409
126591	5116775	3	8	NO	5.47	9.7	3.1591461246715	7.610936466174	6.8928015402023	1521393627.6935	FALSE	1.0260238647461	3.0790181722072	1.126916002543	1.09833312972878	0.46358874615212	0.451830373620832	1.462446023887	1521393626.9275	0.76601791381836	1.90915381677847	0.45960824384748	0.72403693903725	0.94519583155458	0.073122901165013	8.0832108983042	142.7563796628940	18.1651583818144	3.07412743037169	163.99566547508	0.07228	0.06292	0.11477	74	18	0.04782	8.26955	5.30730	0.31233	255.52900
126341	5106517	3	8	NO	5.12	8.2	3.1552133767437	7.1633692572004	6.7814208016054	1521153454.1132	FALSE	1.0260107517242	3.0752244763921	1.0224631791806	0.9965423631890	0.48719189492561	0.47484092550384	1.6116527821909	1521153453.2922	0.82100892066956	1.96301494614278	0.48538723595748	0.87572865860578	1.06664938292217	2.6431671892006	1.612854649592	142.4066326484070	14.9543693430165	3.39525859664341	160.756260588067	0.07320	0.06484	0.12841	73	21	0.06003	8.24212	5.20247	0.36621	254.68162
126902	5130385	3	8	NO	7.7	32.7	3.6140363227532	8.5494316063151	8.6244368726911	1521750117.7458	FALSE	1.1770057678223	3.0705340802534	1.1714934098402	0.9953166261944	0.40630755447912	0.345204386917212	1.9941784621277	1521750116.6448	1.1010053157806	1.8112341816568	0.40502568082621	0.84290276869719	0.765575566816934	0.93357634585887	10.599400001754	123.7592693632880	13.0038637430580	1.56423682234444	138.32736992869	0.04467	0.03997	0.05604	46	8	0.02056	6.23259	4.47661	0.15101	192.58699
120454	4866362	3	8	NO	6.2	20.4	4.1747050977507	8.987595423095	8.732825554237	1515550107.1941	FALSE	1.360015630722	3.06960082181883	1.3810247489602	1.01544770351429	0.55210803395354	0.405957123934259	1.7203471695428	1515550106.5131	0.68100786209106	2.52617813289322	0.40790295935916	0.80812882808283	1.18666593011341	0.87257529469081	10.31077978519	107.040564044671	11.7138513235226	1.87216843210527	120.626583800299	0.04390	0.03896	0.08710	145	32	0.06390	9.62305	3.90377	0.32221	297.35240
120454	4866362	3	8	NO	6.2	20.4	2.376001516385	3.3997215080084	4.8633579797037	1515550115.9622	FALSE	0.77700877189636	3.05788248771781	1.1224904924982	1.44463039942092	0.93472019186219	1.20297250902447	1.8998388366336	1515550115.1732	0.78900933265686	2.40787878926122	0.93311769159361	0.71851568210881	0.91065549210847	0.12687575507108	8.1229398047577	185.92772082443	41.4969388713483	28.77490957189960	256.199569267678	0.17177	0.12465	0.10569	114	16	0.05436	12.49093	8.29125	0.32090	385.96969
126341	5106503	3	8	NO	5.12	8.2	2.0767060136368	2.7912006039778	8.7747238106154	1521150720.107	FALSE	0.68000721931458	3.05394700916563	1.0103176521441	1.48574547952956	0.83541651696306	1.22854065844349	1.5270406123996	1521150719.502	0.60500645637512	2.52400713464915	0.82835664130746	0.44666780366765	0.73828601159705	0.97880985420842	6.2178717567254	211.903414375181	50.1537944214598	34.29209579934730	296.349304595988	0.05341	0.03819	0.15689	163	14	0.08318	15.30597	9.59059	0.47314	472.95441
126903	5130390	3	8	NO	7.68	32.7	2.5336107614045	5.0427470901025	10.045237068365	1521754798.3705	FALSE	0.83099842071533	3.04887554325741	1.0222459849596	1.2301419105943	1.0558899234991	1.27062807482857	2.2650433564785	1521754796.5785	1.7919971942902	1.2639770663121	1.0519107758334	0.87520548256731	0.488396681287201	0.070099339788037	12.523157784474	172.825442899992	28.1344685191745	30.016854440843	230.97676586001	0.03882	0.02905	0.06641	14	2	0.00982	7.98730	7.47498	0.22399	246.80760
130362	5275454	3	8	NO	6.418	11.3	1.8718850337603	2.0661359467573	7.9332533572031	1523458171.2021	FALSE	0.61500787734985	3.04367651651309	1.4417254549032	2.34423900571125	0.99055134763066	1.61063196767345	2.0001901861981	1523458170.0791	1.1230144500732	1.7810903377670	0.98499289491271	0.86621469632079	0.771329964867619	0	10.012805973045	232.725939553954	138.054822218686	65.16890662110430	435.949668393744	0.08694	0.04641	0.13284	44	8	0.02884	15.78569	14.10840	0.42003	487.77780
126902	5130386	3	8	NO	7.7	32.7	2.895204585707	7.3125831408285	8.8331814932848	1521750640.2593	FALSE	0.96100473403931	3.01268504010155	1.8727282247625	1.94871904209152	0.84211530698002	0.87628632529252	1.8699249657412	1521750639.4923	0.76700377464294	2.43796057797981	0.83993523491798	0.77631844833042	1.01214423448153	0	10.984480560661	145.918520808163	61.0522135367607	12.34511175018550	219.315846095109	0.05513	0.03668	0.07255	120	21	0.03706	11.64001	7.09760	0.21393	359.67624
126341	5106514	3	8	NO	5.12	8.2	2.8579699556458	5.4532956215641	4.225006734605	1521152698.9951	FALSE	0.95100998878479	3.00519446625134	0.86832931163603	0.91306013803871	0.43657595848708	0.45906558672947	1.2333356261697	1521152698.2941	0.701007604599	1.75937553041983	0.43474432174932	0.90159355425071	1.28613947742614	0	7.055219952349	146.719745897837	13.54385112047190	3.42367775102268	163.687274769332	0.17797	0.15952	0.12119	68	36	0.05713	8.68499	5.29732	0.34515	268.36610
130363	5275461	3	8	NO	5.9	5	3.065122969884	7.0184025056162	7.6588406883887	1523537992.9623	FALSE	1.0250489711761	2.99022100999448	1.1873217770794	1.1583073691759	0.36765375248258	0.358669451724583	1.8200257393688	1523537992.1082	0.85404062271118	2.13107631062217	0.36514217225812	0.76712598245538	0.89823125745484	0.41854181829239	8.1075821007095	134.769136864319	20.2223446760713	1.93897695516533	156.930458495556	0.05597	0.04806	0.09431	82	15	0.04844	8.20983	5.07866	0.27947	253.68384
119055	4806874	3	8	NO	5.37	10.6	3.8003529349104	8.7090083845904	7.2334591353792	1514747555.9181	FALSE	1.2740149497986	2.9829735793220	1.236116999728	0.970253135509445	0.64306239118025	0.50475262576935	1.4423254015473	1514747555.2591	0.65900778770447	2.18863180141068	0.64047633311852	0.58676242999704	0.89037252813190	0.9961496789135	7.2590137180664	107.9077837857750	11.4162657376372	3.0896631510388	122.413712674451	0.06083	0.05362	0.11037	112	19	0.06104	8.19743	3.96161	0.34652	253.30045
130360	5275435	3	8	NO	5.93	8.9	3.927623398366	8.8645361829198	6.6200480975273	1523350635.5405	FALSE	1.3170237541199	2.98219632415866	1.1636564939679	0.8835501184605	0.4400402040529	0.3341171354551	1.4849112185931	1523350634.9135	0.6270112991333	2.3682367776237	0.38908252334035	0.81418238819192	1.29851310385848	0	9.898332712335	104.329550639976	9.1579286289008	1.3095810267415	114.797060295618	0.07041	0.06399	0.08774	138	42	0.06541	9.53214	3.71512	0.33231	294.54316
119735	4837559	3	8	NO	6.97	21.2	2.425758716171	4.5495101787312	6.2213623346962	1515263548.6483	FALSE	0.82102227210999	2.95455896700209	1.9696736600117	2.39905021693227	1.1217193770185	1.36624719587172	0.70746844214759	1515263548.3033	0.34500932693481	2.05057772910953	1.1089958822827	0.40054148897948	1.16095843708933	0	7.5682161325762	164.27023155663	108.305926703341	35.1262762450965	307.702434505068	0.13320	0.07111	0.10613	188	60	0.03604	18.00517	9.95801	0.27252	556.35981
126591	5116776	3	8	NO	5.47	9.7	1.8345642785773	2.08183320416	8.0576715943109	1521393915.4883	FALSE	0.62601470947266	2.93054500288451	1.9412956114961	3.1010383336382	0.73070549051427	1.16723373981068	0.91016357353942	1521393914.8613	0.62701463699341	1.45158265826733	0.72266241344121	0.68502745567537	1.09252227182468	0.094174784592987	7.9068854302461	211.953569952072	237.333047272278	33.62479236235000	482.9114095867	0.09502	0.04171	0.20620	52	29	0.03478	18.26027	15.62820	0.48223	564.24248
120454	4866362	3	8	NO	6.2	20.4	3.8977297344994	8.7027341775228	7.3972782510386	1515550111.9342	FALSE	1.3390154838562	2.9108922051255	1.1259368730022	0.8408691957464	0.81579332081551	0.609248608885482	1.3594696554795	1515550111.1672	0.76700901985168	1.7724298154178	0.3462397542998	0.67103388778098	0.87487092121908	0.46769950733015	9.4960166586007	97.7676397843692	8.1583018635669	4.28284125233633	110.208782900272	0.05504	0.04882	0.07835	63	15	0.03205	6.11347	3.56663	0.21122	188.90630
126590	5116753	3	8	NO	5.64	10.4	3.2996718191682	7.812643390942	6.2260701468733	1521317696.2268	FALSE	1.1340143680573	2.9097266420186	0.984462002978	0.868121278449495	0.36724108577624	0.323841651499855	1.2480457524742	1521317695.5578	0.66900849342346	1.86551555734021	0.312078950187	0.58531914080682	0.87490539591152	0.85603181428458	6.7755359328036	115.3491258688840	10.2676422704787	1.42881281859667	127.045580957959	0.07585	0.06887	0.09243	80	18	0.04208	7.28457	4.11151	0.26038	225.09312
122199	4938010	3	8	NO	5.77	14.4	2.407683680529	4.0470427775923	6.8528170268534	1517435969.4467	FALSE	0.82765316963196	2.90904906653067	0.70895106391358	0.85657989351848	1.0238624514071	1.23706703360103	2.5420263858718	1517435968.0703	1.3764340877533	1.8468202789289	1.021175550689	0.65647474947279	0.476938747240944	0.40122061955081	7.0036079870222	157.972755716688	13.69669715157870	28.5671271885309	200.236580056798	0.07202	0.05682	0.10159	38	3	0.03446	7.80176	6.48015	0.32571	241.07430
146087	5934776	3	8	NO	4.91	5.7	3.79921190654305	8.65567225060625	6.26545055577638	1537653570.27177	FALSE	1.30601215362549	2.90901726756251	1.33514234694015	1.02230468777323	0.587226340118528	0.449633135869668	1.3639973426148	1537653569.72077	0.551005125045776	2.47547124448522	0.586184385027545	0.483171904585592	0.876891852041215	0	7.73997031843709	100.10917068424500	12.36351527695390	2.39165142912442	114.864337390323	0.07799	0.06797	0.12699	172	22	0.09020	9.97576	3.71729	0.48458	308.25104
130362	5275458	3	8	NO	6.418	11.3	3.2252296267372	7.5030097343636	6.9530227787652	1523459332.2781	FALSE	1.1230144500732	2.8719395609976	1.0755654709534	0.9577485586969	0.44168201133574	0.393300381225683	1.2504566258079	1523459331.5001	0.77801012992859	1.60724980010565	0.28400461883979	0.61316233591709	0.78811613413487	0.66526762234155	7.5444187862303	113.4733121207400	12.6196163906215	2.12809922737036	128.221027738732	0.06079	0.05379	0.07134	51	12	0.02453	6.20889	4.14955	0.18070	191.85472
146087	5934774	3	8	NO	4.91	5.7	3.67007684905702	8.46002886427027	5.57389821347645	1537652475.80551	FALSE	1.28501200675964	2.85606424667712	1.03057645641086	0.80199753075430	0.565002410282575	0.439686483325022	1.31649667053259	1537652475.2335	0.572005271911621	2.30154639332764	0.345336266282205	0.462113871086436	0.807883937051958	0	7.10338709403489	98.07475758652560	7.73334455667847	2.32438213043715	108.132484273641	0.09127	0.08278	0.11763	143	18	0.07782	8.70025	3.49943	0.42262	268.83780
126341	5106523	3	8	NO	5.12	8.2	2.429044819036	3.0994406383363	3.7719034823564	1521154074.3568	FALSE	0.85300898551941	2.84761926342068	0.78939685777074	0.92542619265618	0.28337908796427	0.33221114053296	1.5567762231879	1521154072.8778	1.479015827179	1.05257577003568	0.14764739813641	0.6662779249627	0.450487352953839	0.58841868164813	5.4486626801027	146.871903026922	15.51166626911810	1.99895612615067	164.382525422191	0.20114	0.17971	0.10916	12	2	0.01577	5.76297	5.31982	0.32330	178.07589
126341	5106516	3	8	NO	5.12	8.2	3.2175149072576	7.3119077646625	6.1573657897261	1521153299.9265	FALSE	1.1330120563507	2.8397887641380	0.80899847733768	0.714024597358099	0.32662953175864	0.288284250752526	1.4960118286739	1521153299.1165	0.81000876426697	1.8469081998486	0.31423462207175	0.78559183010842	0.96985596300227	1.5562873494583	4.4562454614926	109.9679237980820	6.95216864363391	1.13327624841806	118.053368690134	0.07200	0.06707	0.10413	65	18	0.05234	6.50670	3.82050	0.30413	201.05694
146087	5934783	3	8	NO	4.91	5.7	2.11529934188107	2.14129769629672	5.2455332706547	1537654859.09586	FALSE	0.746006965637207	2.83549543009196	0.637123912098369	0.854045526979986	0.439359081561612	0.588947693251537	1.13728590177279	1537654858.48085	0.615005731582642	1.8492281345836	0.378735324919637	0.450947885684439	0.733241761054779	0.0768959636100464	5.528411166659	166.511220649684	15.105936196804500	7.183548882336560	188.800705728825	0.10447	0.09213	0.11923	86	14	0.05176	9.32733	6.11006	0.33206	288.21458
119055	4806870	3	8	NO	5.37	10.6	2.0785309630488	2.0758699763466	5.8816621581294	1514746601.7418	FALSE	0.73400855064392	2.83175306503634	0.76697467901403	1.04491245822844	0.61519821144192	0.83813493848570	2.1860912817557	1514746600.5328	1.209014415741	1.80815981455097	0.54037594826743	0.62428948261828	0.516362315031335	0.82210593510571	5.9160113676615	168.786661478343	22.98196606296880	14.78615500587160	206.554782547183	0.08944	0.07309	0.10730	42	3	0.03866	8.14700	6.68462	0.34617	251.74226
119056	4806885	3	8	NO	5.14	11.5	3.3529434573133	7.629608044129	6.6903240563869	1514764407.329	FALSE	1.1870152950287	2.8246842912266	0.88357270916633	0.744365058198316	0.43569884749229	0.367054114059883	1.3592139228938	1514764406.735	0.59400773048401	2.28820914802958	0.31613519025795	0.60245876847163	1.01422715152332	0	6.6208359402261	103.8513145518080	7.21180749463866	1.75360736599917	112.816729412446	0.06106	0.05621	0.10344	136	27	0.07476	8.92416	3.65103	0.37938	275.75639
119055	4806869	3	8	NO	5.37	10.6	3.1356285347878	6.6809187508371	4.7259372734937	1514746467.4512	FALSE	1.1120131015778	2.8197766108500	0.84841044438989	0.762950043651561	0.50813725693763	0.456952581059207	1.3659791967144	1514746466.8032	0.64800763130188	2.10796776261736	0.50576488907237	0.64030097287551	0.98810714865983	0.55040273012544	5.4580683220239	110.4709242300650	8.08743464439132	2.90108764282924	121.459446517286	0.12342	0.11225	0.09559	106	23	0.05926	8.11269	3.93073	0.31225	250.68201
126902	5130382	3	8	NO	7.7	32.7	2.7639461166318	5.4132407024917	6.3165738953417	1521748528.4241	FALSE	0.9830048084259	2.8117320413292	1.1499917529126	1.1698739854122	0.51828793265673	0.527248624029288	1.7261510876153	1521748527.3661	1.0580050945282	1.6315149109798	0.51716848209608	0.85896764343753	0.811874770622511	0	10.121638442582	124.2569534951320	21.5105249320290	4.36921837664518	150.136696803806	0.07549	0.06248	0.05080	39	10	0.01766	6.42825	4.85879	0.13955	198.63284
119735	4837560	3	8	NO	6.97	21.2	2.2111296449834	2.8362009669305	7.2624219050334	1515263587.3483	FALSE	0.78802132606506	2.80592614926369	1.6499320208101	2.0937656967343	0.99982574153222	1.26878005513479	0.6127884765988	1515263587.0243	0.32400870323181	1.89127165562705	0.98771124976451	0.50828720031236	1.56874551591507	0	7.7031688427084	154.362920143342	85.950156815295	31.56190432250160	271.874981281139	0.08290	0.04707	0.09000	171	117	0.03919	18.11599	8.79854	0.26150	559.78424
146097	5934989	3	8	NO	7.44	37.6	3.84376076809288	8.60198553913191	6.67280078272514	1538254426.13345	FALSE	1.37200593948364	2.80156277569724	0.977902653094766	0.712753950221822	0.353087136738902	0.257351026389716	1.7876677764638	1538254424.97844	1.15500521659851	1.54775731812578	0.213296223206402	0.921453194869736	0.797791370660139	0.362914225497327	11.3932695406408	88.38390971689370	5.72073404682686	0.745803301693752	94.8504470654143	0.05965	0.05558	0.04798	32	9	0.01727	4.38215	3.06959	0.12616	135.40850
146087	5934782	3	8	NO	4.91	5.7	2.02438261837683	2.33206958538357	7.77689475695735	1537654707.08543	FALSE	0.724006652832031	2.79608289572787	0.538519898133	0.743805179174142	0.854612721750461	1.180393465180950	0.276076171837112	1537654706.80443	0.281002759933472	0.982467830218015	-0.0371603068333343	0.326745328140188	1.162783341407560	0	8.0991991358225	166.834557011528	11.806041975048	29.733054019755500	208.373653006332	0.05091	0.04076	0.12771	53	74	0.03031	10.86677	6.74348	0.28567	335.78312
126341	5106503	3	8	NO	5.12	8.2	2.7393674348973	5.0570442435592	7.9886501081025	1521150721.705	FALSE	0.98201036453247	2.7895504302559	1.0240072652574	1.04276624997224	0.49978795089775	0.50894366184790	1.8845246311648	1521150720.787	0.91800975799561	2.05283725445303	0.49730481602594	0.73134230688755	0.79666071141157	0.20041333606339	8.1072860686689	122.428025820965	17.1074919791222	4.07522725979925	143.610745059886	0.04510	0.03845	0.10979	71	11	0.05832	7.28853	4.64760	0.33314	225.21565
126902	5130381	3	8	NO	7.7	32.7	3.3342954121274	7.8824476740997	3.0804548659002	1521747935.4713	FALSE	1.1980059146881	2.7832044660610	1.0094400041459	0.8426001839972	0.36231147638368	0.302428787655867	1.5389857973459	1521747934.5863	0.88500428199768	1.73895858884662	0.3587734363752	1.0486794672315	1.18494281729842	0.1253657358515	6.5062931863013	99.8986793188261	9.1561441376267	1.17954843456195	110.234371891015	0.28402	0.25739	0.04546	53	25	0.02355	6.06918	3.56746	0.13446	187.53753
130363	5275466	3	8	NO	5.9	5	2.6363674857437	4.3767629953637	7.6880809903477	1523538560.1384	FALSE	0.9510452747345	2.7720735865910	1.9217848094047	2.0207080151270	1.3555053261402	1.4252794921026	2.4668266887054	1523538558.8753	1.2630603313446	1.9530553113637	1.3400184186485	0.9636138754679	0.7629199109136	1.1369914872444	9.8084913365991	124.8351251853290	66.3337301693349	33.0010200635934	224.1698754182570	0.07361	0.04099	0.12499	47	7	0.03982	8.99509	7.25469	0.36080	277.94838
119054	4806861	3	8	NO	6.85	31.2	3.2602110128072	6.6292777850687	10.495083448824	1515010860.1454	FALSE	1.1770076751709	2.7699148285790	0.71304205384284	0.605809179400047	0.65749028722981	0.558611724544909	2.3931513844383	1515010858.9474	1.1980078220367	1.9976091478015	0.21313698816863	1.0146661833042	0.8469612340086	1.299031154312	10.151073719787	100.7121852603290	4.81749073529829	4.09608803761207	109.625764033239	0.02391	0.02196	0.05612	51	9	0.03164	5.51260	3.54776	0.17596	170.33930
120454	4866360	3	8	NO	6.2	20.4	3.1383024572391	7.0700054263111	6.6938254300175	1515549495.5411	FALSE	1.1340131759644	2.7674303295199	0.93461048533103	0.824161927868438	0.50213127237084	0.442791391681858	1.0664355981524	1515549494.8611	0.68000769615173	1.56826989486667	0.32901507784559	0.58966966012506	0.86715145058224	0.44215588469247	3.9758203222176	104.3431096940380	9.25412752704495	2.67121424147795	116.268451462561	0.06005	0.05389	0.07000	56	17	0.02634	6.12405	3.76273	0.18225	189.23302
120454	4866360	3	8	NO	6.2	20.4	3.1243890435133	7.1375175974361	8.3323624994666	1515549482.4649	FALSE	1.1340131759644	2.7551611478026	1.3325123068005	1.1750412914447	0.49105647278626	0.43302536795364	1.4193702358671	1515549481.6009	0.86400985717773	1.64277088285016	0.34151868925135	0.66868960619389	0.77393747379012	0.99750143983105	9.6190623076607	103.4199668653190	18.8112060050171	2.55468325849756	124.785856128834	0.04160	0.03447	0.07513	48	11	0.02705	5.94673	4.03838	0.19492	183.75403
126902	5130378	3	8	NO	7.7	32.7	3.0624008508861	7.2096731386264	8.4717783838097	1521747263.42	FALSE	1.1120054721832	2.7539440474818	1.2402356047052	1.1153142999110	0.59273280361675	0.533030473719736	1.6435681360496	1521747262.448	0.97200465202332	1.69090562748682	0.59110171387602	1.1883384569166	1.22256457769308	0	11.331281129194	105.3735918559390	17.2828794362593	3.94753179474135	126.60400308694	0.04003	0.03332	0.04846	45	24	0.02315	6.33683	4.09722	0.14046	195.80800
119054	4806859	3	8	NO	6.85	31.2	3.0009364372306	6.7690720666153	6.9391740770199	1515009451.5671	FALSE	1.091007232666	2.75061094681973	1.1392044578766	1.04417681548529	0.47581278318293	0.436122482909877	1.5146221081691	1515009450.5741	0.99300646781921	1.52528926774811	0.47294156960142	0.78411628206626	0.78963864534367	0	10.767707289756	107.141861642083	15.4400586682551	2.69350512311089	125.275425433449	0.05793	0.04954	0.05945	36	10	0.01982	5.53963	4.05422	0.15515	171.17449
126902	5130381	3	8	NO	7.7	32.7	3.5321106706862	8.2379368055983	7.3639687933055	1521747930.9152	FALSE	1.2850062847137	2.7487108138721	1.2108130689453	0.9422623712810	0.44511281969138	0.346389605238819	1.1711247508779	1521747930.1482	0.76700377464294	1.52688264333913	0.40616746296927	0.69177978430887	0.90192487596415	0	9.2410956821592	90.8408802939866	10.6749765176336	1.44262327172468	102.958480083345	0.04979	0.04393	0.04554	47	16	0.01672	5.38207	3.33199	0.11747	166.30597
126341	5106530	3	8	NO	5.12	8.2	2.6399507510318	4.1351631304378	5.4029766311736	1521154882.1404	FALSE	0.96101021766663	2.74705794225758	0.77855285077049	0.81014003437013	0.26025198344061	0.27081083911107	1.0656166214361	1521154881.6004	0.5400059223175	1.9733424716212	0.27163561886081	0.44326884809309	0.820859234637185	0	6.312522353259	121.321038247697	10.55165703424010	1.17905092748419	133.051746209421	0.08939	0.08151	0.09954	111	19	0.05494	8.53536	4.30588	0.30820	263.74273
146087	5934781	3	8	NO	4.91	5.7	3.43964637818272	8.20249109669887	6.50427188454391	1537654614.66056	FALSE	1.25301194190979	2.74510263081783	1.0636339135641	0.84886175301965	0.376381431243649	0.300381360029166	1.50797941446861	1537654613.96956	0.691006422042847	2.18229435554378	0.397451571393159	0.684572420984794	0.990688941733664	0.359766011897786	7.82923284346028	92.91598724316220	8.88479078915132	1.11254921666882	102.913327248982	0.06221	0.05616	0.10916	106	22	0.07512	7.48669	3.33053	0.38071	231.33882
126590	5116763	3	8	NO	5.64	10.4	2.9634213044817	6.6615660141074	5.7420496905681	1521319430.0458	FALSE	1.0800135135651	2.7438742823685	1.2669574800397	1.1730940994039	0.40559281124214	0.375544200278835	1.406301896566	1521319428.7608	1.2850162982941	1.09438448246369	0.43407101876533	0.5287637924337	0.4114841135756	0.91698662757127	7.2793154392268	107.7029781900830	19.6863406045593	2.01753655759057	129.406855352233	0.08651	0.07200	0.08967	14	2	0.01355	4.71982	4.18792	0.22129	145.84252
126590	5116765	3	8	NO	5.64	10.4	1.5045157044569	1.4237966593233	6.6979429236869	1521319962.0755	TRUE	0.55100703239441	2.73048367081451	0.54525148769542	0.98955449865317	1.0160878428131	1.84405603390881	0.52712009061076	1521319961.7735	0.30200362205505	1.74540982993467	-0.076415128301199	0.22228487766357	0.73603381360456	0	7.0206240649686	209.050162450162	27.45685416924710	95.3497522706998	331.856768890109	0.08318	0.05240	0.11731	156	28	0.03557	16.68036	10.73970	0.28207	515.42314
121170	4896305	3	8	NO	6.34	34.9	2.2955769984517	2.7119322528169	8.7461788420664	1516648691.0444	FALSE	0.84200501441956	2.72632224171986	1.6872279715754	2.00382176196243	1.027819115663	1.22068051622178	1.1100146396328	1516648690.6344	0.41000247001648	2.70733646943196	1.0172996264396	0.63949759662586	1.55974083912264	0	8.9356301288893	136.385493379957	73.6770084352167	27.3412163362587	237.403718151432	0.05333	0.03064	0.10149	276	92	0.07658	19.58834	7.68297	0.38476	605.27965
126903	5130391	3	8	NO	7.68	32.7	3.4308885694024	8.1433672826847	9.0517284653975	1521756178.9062	FALSE	1.2629978656769	2.7164642654116	1.3381820703488	1.0595283703283	0.59314487445558	0.469632523201206	1.700288882841	1521756177.9562	0.94999837875366	1.78978082580696	0.59169354819026	0.70540516159161	0.74253301623215	1.4306127699613	9.7859094058421	90.2680082243335	13.7325455170523	2.69800156707346	106.698555308459	0.03357	0.02840	0.04663	52	9	0.02007	5.42917	3.45303	0.12846	167.76146
119735	4837557	3	8	NO	6.97	21.2	2.9830585797257	5.9350509961208	6.276532513085	1515262493.8437	FALSE	1.1010298728943	2.7093348265693	0.81996204249666	0.744722793343662	0.46247627898774	0.42003971951462	2.6265842728484	1515262492.5477	1.2960350513458	2.0266305838881	0.46105229873523	0.70893051863085	0.546999495032714	3.3124161839431	5.6539058258414	103.0041542650450	7.7824918400038	2.47576888814984	113.262414993199	0.06460	0.05875	0.05239	49	4	0.02860	5.36542	3.66545	0.16695	165.79147
126341	5106511	3	8	NO	5.12	8.2	1.457805540845	1.3911131140072	8.5827936701705	1521152155.2583	TRUE	0.54000568389893	2.69961147504857	1.0862918212245	2.0116303468906	0.85319562129017	1.57997526087125	0.96868425042538	1521152154.8583	0.40000438690186	2.42168406683761	0.85068246053777	0.52009631630431	1.30022653084531	0.74449555331207	6.0480903621769	208.512782462822	115.778124463795	71.42178933607400	395.712696262691	0.05920	0.03119	0.16636	227	65	0.09087	22.25006	12.80624	0.50314	687.52688
119056	4806893	3	8	NO	5.14	11.5	3.283296063151	7.5379394682301	6.2351229777135	1514766865.23	FALSE	1.2200157642365	2.69119150702592	0.91431731242693	0.749430736248822	0.50591528780177	0.414679303851764	1.2760193484701	1514766864.615	0.61500811576843	2.07480082905209	0.22805099985477	0.63822454251099	1.03774978922604	0.46533933948181	4.4840191204508	91.7175084698375	7.11256163541683	2.1776484122537	101.007718517508	0.06469	0.05874	0.09519	108	27	0.06423	7.64419	3.26886	0.33482	236.20532
126591	5116774	3	8	NO	5.47	9.7	4.031520765935	8.8992360780319	7.6180663966373	1521393357.5332	FALSE	1.5010352134705	2.68582690782706	1.0849205321301	0.7227815326342	0.59762852902232	0.398144243159066	1.4288351283986	1521393356.8862	0.64701509475708	2.20834898594607	0.4471860738603	0.77431723500136	1.19675296801549	0.67367188694588	8.0696730301068	74.2495189069539	5.3771443874769	1.63161798650305	81.2582812809339	0.04289	0.03919	0.08319	116	34	0.06648	7.50520	2.62972	0.33978	231.91072
121170	4896272	3	8	NO	6.34	34.9	3.1523580402348	7.1014921304832	8.6374268717742	1516649798.7233	FALSE	1.1763198375702	2.6798477247024	1.2926460469063	1.0988899495025	0.51167049251184	0.434975655574035	1.5545535458433	1516649797.6989	1.0244076251984	1.5175146178185	0.5112881463486	0.53436984057863	0.521637898268413	2.0578582807494	7.8795165000471	94.3242361409930	15.8603024665503	2.48503760643278	112.669576213976	0.03625	0.03035	0.06729	35	4	0.02020	4.90307	3.64626	0.16928	151.50478
126591	5116775	3	8	NO	5.47	9.7	2.3986585538791	3.0308046013085	6.3524242534658	1521393631.0626	FALSE	0.89602088928223	2.6770118672128	1.0171399549326	1.13517437718153	0.46096096749325	0.51445337157542	1.6152942699962	1521393630.4686	0.59401392936707	2.71928685530543	0.45818127928868	0.84287906765293	1.41895505472579	0	7.7826051037743	123.569401142429	22.21956276607	4.56354549762979	150.352509406129	0.06813	0.05600	0.09189	192	52	0.09914	12.78474	4.86578	0.40149	395.04862
130361	5275446	3	8	NO	5.79	5	3.3089224469219	7.7031794910147	9.6614404176458	1523370347.9503	FALSE	1.2420017719269	2.6641849647189	1.2128397876996	0.9765201750219	0.37860632427232	0.304835574980648	1.4566268243933	1523370347.3993	0.55100083351135	2.64360185285145	0.17726046478148	0.68487720322166	1.24296945044014	2.0874351512134	9.625804247365	88.2947770760307	11.8622946922343	1.15594605141146	101.313017819676	0.02751	0.02398	0.07660	196	43	0.08026	11.02247	3.27874	0.37176	340.59429
119056	4806891	3	8	NO	5.14	11.5	2.9935877533385	6.5658982071543	6.8839256039218	1514766255.1721	FALSE	1.1340148448944	2.6398135498987	1.2619894532816	1.1128509110470	0.40229116794631	0.354749472423151	1.4976095696606	1514766254.6001	0.57200741767883	2.6181645960778	0.37983086979671	0.73576974350384	1.28629405976857	0	7.1122575212226	94.9415355260712	16.8726662239182	1.71456226186496	113.528764011854	0.05544	0.04637	0.09945	185	45	0.10156	11.11221	3.67407	0.45250	343.36718
126902	5130384	3	8	NO	7.7	32.7	3.711005801683	8.5746892517778	8.187177757273	1521749883.3357	FALSE	1.4140067100525	2.62446123862115	1.127921280353	0.797677459614829	0.56628364230808	0.400481580661703	1.4718806472387	1521749882.5147	0.82100391387939	1.79278152315231	0.49495984473007	0.76008265229758	0.92579662465439	0.28852731608081	9.557293854405	75.2588086716244	6.95235041820163	1.75243575757121	83.9635948473972	0.03615	0.03240	0.04087	60	16	0.02165	5.19665	2.71727	0.12353	160.57650
130360	5275441	3	8	NO	5.93	8.9	3.7337697961448	8.471817719063	5.8597608460461	1523351820.9998	FALSE	1.4360258579254	2.6000714231838	1.1473654772643	0.7989866414536	0.81680438764016	0.568795041629809	1.1611621154123	1523351820.4158	0.5840106010437	1.9882552017672	0.45683338151853	0.42991688305537	0.736145683463716	0	6.795905325049	72.7338840320697	6.8682367993828	3.48079003791985	83.0829108693723	0.07091	0.06208	0.06924	105	14	0.04031	6.53722	2.68877	0.23681	201.99996
121170	4896277	3	8	NO	6.34	34.9	3.2534424635789	7.5769250033251	7.5411213032143	1516646646.5961	FALSE	1.2530083656311	2.5965049817846	1.1467347107574	0.9151851992463	0.30125760884176	0.240427452126408	1.4125076978609	1516646645.7541	0.84200549125671	1.67755164607383	0.30156306884466	0.77026053297397	0.91479276676016	0.11939893433451	10.313280686143	83.1290530995089	10.3274354471600	0.712758854942935	94.1692474016118	0.04234	0.03738	0.05991	52	15	0.02864	5.21560	3.04755	0.17143	161.16209
119055	4806873	3	8	NO	5.37	10.6	2.4056655391988	2.9151395379827	7.6072494026122	1514747431.6756	FALSE	0.92901086807251	2.58949127709347	1.659902084566	1.78674129831218	1.1905353407986	1.28150851805286	1.7462846904089	1514747431.0496	0.6260073184967	2.7895595447709	1.1775544097097	0.60501173914412	0.966461127957739	0.094731292702305	8.5762213748397	111.515848690186	53.0922389734165	27.3118226454149	191.919910309017	0.06288	0.03653	0.12618	192	23	0.09530	13.17233	6.21100	0.44793	407.02507
146097	5934973	3	8	NO	7.44	37.6	3.68186851261841	8.39705157801665	10.4965722417111	1538258495.34738	FALSE	1.42301726341248	2.58736742503676	1.17060818418441	0.82262402170528	0.477212908896561	0.335352859846673	1.96754279303853	1538258494.38771	0.959663152694702	2.05024313741101	0.473780402342391	0.760532455305103	0.792499381860764	1.58802838491864	7.53333237613483	72.68328159319280	7.34718693272579	1.22101877964343	81.251487305562	0.02142	0.01916	0.04263	68	10	0.02752	5.14681	2.62950	0.13971	159.03657
120454	4866360	3	8	NO	6.2	20.4	3.266179419272	7.6200573281054	7.6715382260242	1515549491.589	FALSE	1.2640147209167	2.58397261141332	1.0916173533502	0.8636112659816	0.69701691441004	0.551431010158286	1.128381316434	1515549491.017	0.57200646400452	1.97267231655809	0.35879448202192	0.48579643832397	0.84928487507465	0	13.791648858243	81.6116510721011	9.1161812269290	3.7167103976365	94.4445426966666	0.04140	0.03577	0.06338	105	19	0.03784	7.08851	3.05646	0.21351	219.03498
119056	4806890	3	8	NO	5.14	11.5	1.5774603503656	1.2930260949104	5.0598618361408	1514766070.2997	TRUE	0.61500811576843	2.56494233152455	0.91941479630829	1.49496368053536	0.56995119478234	0.92673768064053	1.2135016012599	1514766069.8567	0.44300580024719	2.73924540171435	0.56745940041486	0.37634051861203	0.84951600724424	0	6.2548085927783	165.273356527204	56.14472002765050	21.57552041753010	242.993596972385	0.11912	0.08102	0.11544	262	25	0.09816	17.14721	7.86387	0.43303	529.84866
119056	4806890	3	8	NO	5.14	11.5	1.6597278674084	1.3994797011698	6.4807461121603	1514766067.9997	TRUE	0.64800834655762	2.56127544687547	0.93524964158169	1.44326789392446	0.68418765139691	1.05583154141684	0.97494450775016	1514766067.4376	0.56200742721558	1.73475377822041	0.68329079734176	0.68341922838472	1.21603237838095	0	7.5394142503985	156.408537978824	49.66401030417970	26.57890883502880	232.651457118033	0.07326	0.04925	0.11646	83	41	0.05356	11.52210	7.52917	0.33278	356.03280
120454	4866361	3	8	NO	6.2	20.4	2.0997869964084	2.1326886787011	8.9028091455214	1515549981.0847	FALSE	0.82000946998596	2.56068627651867	0.8375580670665	1.02140048099791	0.38978702212834	0.47534453734420	0.39598309694794	1515549980.7607	0.32400369644165	1.22215610900986	0.24704505375878	0.19226169807844	0.59339353282059	0.5513321075473	7.3401445874097	123.544200649339	19.6562981927265	4.25722526221155	147.457724104277	0.03113	0.02609	0.06420	71	17	0.01514	7.62049	4.77209	0.14302	235.47315
126590	5116764	3	8	NO	5.64	10.4	3.3949141233053	7.9403536054498	8.292227285129	1521319620.2772	FALSE	1.3280167579651	2.5563789786111	1.0570441239761	0.7959569166851	0.4949562323163	0.3727033031381	1.632750895137	1521319619.5752	0.70200896263123	2.32582628150105	0.49111816443959	0.64463924763484	0.91827780263466	3.2090520098555	4.5319939663038	76.0283217028167	7.3706204952043	1.6160374168135	85.0149796148344	0.03351	0.02997	0.07243	119	19	0.06198	7.20473	2.75129	0.28995	222.62611
126591	5116774	3	8	NO	5.47	9.7	3.1004807371718	6.8928096355492	6.7364076910246	1521393361.9173	FALSE	1.2200284004211	2.5413184939807	0.9094793103048	0.7454574909821	0.50165255114177	0.411181043792605	1.2650520567174	1521393361.3123	0.60501408576965	2.09094645310299	0.48985684206361	0.83032975971257	1.37241393091913	0	8.0931149731659	81.7855798625790	7.0372715519112	2.14103966232468	90.9638910768149	0.04991	0.04487	0.07570	112	48	0.06592	8.11359	2.94382	0.31209	250.71003
130360	5275433	3	8	NO	5.93	8.9	1.9398962139916	1.8496753225614	7.8862064539284	1523350014.4503	FALSE	0.76601386070251	2.53245576028158	0.67643078039299	0.88305292514242	0.64700950043869	0.84464463847341	0.26429327310824	1523350014.2233	0.2270040512085	1.16426676837362	-0.13355156471635	0.27715288495669	1.22091602982948	0	7.4400853064084	129.352727450495	15.72770384188750	14.38930820886880	159.469739501251	0.04009	0.03251	0.07089	92	101	0.02552	11.42978	5.16083	0.20354	353.18022
130361	5275448	3	8	NO	5.79	5	2.7000271613797	5.6075625688119	8.5781890463798	1523370609.7257	FALSE	1.0690016746521	2.5257464280946	1.8876207308921	1.7657790213532	0.61911928252943	0.579156513230832	1.0460562071309	1523370609.3367	0.38900065422058	2.6890859842558	0.61210137700706	0.62853403360095	1.61576600651305	0.056061044585521	7.9038767592808	92.1997180931744	45.0632804648836	4.84776978859263	142.110768346651	0.04213	0.02734	0.09248	287	104	0.09257	17.24927	4.59905	0.47308	533.00239
146087	5934783	3	8	NO	4.91	5.7	2.93953159211876	5.97329283590484	6.08090980898485	1537654855.17682	FALSE	1.16601085662842	2.52101562812079	0.979220327125355	0.839803781893438	0.404089369780056	0.346557124646764	0.865966179153434	1537654854.64781	0.52900505065918	1.63697147706695	0.40113255076983	0.357601332382898	0.675988503204837	0.340076578761171	5.66473096384974	84.21257856133650	9.34504811488851	1.59138607277339	95.1490127489984	0.06123	0.05419	0.09392	78	13	0.04102	6.04391	3.07926	0.26797	186.75689
126341	5106529	3	8	NO	5.12	8.2	1.7136291010842	1.7304690126932	2.1101534595331	1521154763.3482	TRUE	0.68000721931458	2.52001604161125	1.4554143283803	2.1402924660819	0.95158808876843	1.39937939148292	0.74647571312208	1521154762.7862	0.5620059967041	1.32823442721218	0.94699728099174	0.86527516301021	1.5396190931852	1.5364238934924	4.1086119407503	144.285128665335	104.078543467534	44.49240767868730	292.856079811556	0.91273	0.44969	0.15504	48	65	0.04973	13.15600	9.47754	0.39307	406.52051
126341	5106527	3	8	NO	5.12	8.2	3.7387631350072	8.5006010187796	6.3275894382931	1521154571.8461	FALSE	1.490015745163	2.50921048797253	1.0953239111738	0.735108950848018	0.68785591321389	0.461643385613111	1.5185028734172	1521154571.1661	0.68000721931458	2.23306875322263	0.48775531085837	0.61669209011799	0.90689050439728	0.68361794417259	7.8643354654042	65.2847603677214	5.60326352099546	2.20978927226772	73.0978131609846	0.05552	0.04958	0.08479	113	19	0.06987	6.63694	2.36563	0.34646	205.08136
126902	5130386	3	8	NO	7.7	32.7	3.0454521018799	6.8472413682367	6.8722185308511	1521750634.9143	FALSE	1.2200059890747	2.4962599603217	1.1996164346631	0.9832873325261	0.57352783643151	0.470102476190708	1.8257905600746	1521750633.8353	1.079005241394	1.69210536708404	0.63941729582878	0.63866136381357	0.59189829605319	0.69428097173747	4.7231718278361	78.9125618316658	12.2441152736971	2.79866939551126	93.9553465008742	0.04953	0.04160	0.03946	41	5	0.01709	4.52976	3.04063	0.11076	139.96955
121170	4896304	3	8	NO	6.34	34.9	4.3392973357438	9.0637007790881	8.2296094286345	1516646447.2699	FALSE	1.7490105628967	2.4810012173723	1.0054043493142	0.5748417823441	0.65496845583765	0.374479416952689	1.7262015399116	1516646446.5998	0.67000412940979	2.57640432967513	0.65307253844331	1.1805536997876	1.76200958765367	0	11.065690229892	54.3738401555518	2.9189906641276	1.23877363976841	58.5316044594478	0.03085	0.02866	0.05198	153	72	0.07642	9.16473	1.89423	0.34781	283.19022
146087	5934788	3	8	NO	4.91	5.7	1.9815886845017	1.82956744626376	6.39479713531076	1537655711.71085	FALSE	0.799007654190063	2.48006220479877	0.93675454044935	1.17239745518949	0.588191627952261	0.736152682477740	1.50434287638468	1537655711.09585	0.615005731582642	2.44606318141692	0.58612256698756	0.533400069621614	0.867309103362296	0	7.53296396379215	118.933087110724	26.5783048378545	10.478843202870700	155.990235151449	0.06220	0.04742	0.10551	150	19	0.08809	10.52415	5.04823	0.38926	325.19631
146087	5934774	3	8	NO	4.91	5.7	3.01922868457899	6.04310808029024	5.25000716266281	1537652480.37355	FALSE	1.22001147270203	2.47475433808186	0.664198365261276	0.544419769914325	0.538965838230923	0.441771122887266	0.956405628687059	1537652479.86555	0.508004665374756	1.882670955357300	0.384438930966361	0.425386320588514	0.837366956609947	0.311857524323738	5.72369605193822	77.55838505640810	3.75346477406858	2.47149204657541	83.7833418770521	0.07568	0.07006	0.08653	108	21	0.05553	6.89017	2.71144	0.31144	212.90624
120454	4866364	3	8	NO	6.2	20.4	1.6797667572805	1.4465717847513	5.1718350183476	1515551093.3635	TRUE	0.68100786209106	2.46658937552162	1.1962490343283	1.75658623184639	0.92528097753878	1.35869353210941	1.1140751976175	1515551092.8025	0.56100654602051	1.98585062067488	0.92320077076689	0.38399396969177	0.68447324263081	0.048771476797305	6.7810264378527	138.02891399706	70.0027831364017	41.88122480223820	249.9129219357	0.12985	0.07172	0.09036	109	13	0.03619	12.02011	8.08780	0.24491	371.42138
126340	5106497	3	8	NO	6.62	38.6	3.4563203514633	8.033004921134	7.7630542113052	1520998764.347	FALSE	1.404027223587	2.46171889931957	1.074904778908	0.765586849635	0.67057656372286	0.47760937427529	1.4957490850534	1520998763.451	0.89601755142212	1.66933011823196	0.2631263661498	0.76271697026661	0.85122994416355	1.0231015461757	7.2577734228455	66.6852639954356	6.449735207292	2.51014401872398	75.6451432214514	0.03597	0.03171	0.04946	48	12	0.02526	4.40743	2.44806	0.14587	136.18960
130360	5275443	3	8	NO	5.93	8.9	3.3145005308934	7.6863079936208	7.8934635105567	1523352835.7991	FALSE	1.3610243797302	2.4352984268735	1.1592171740225	0.8517240332258	0.44505949727406	0.327003324776802	1.6586988018251	1523352835.2051	0.59401082992554	2.79237131422843	0.44194301049136	0.8914289895356	1.50069484364004	0.32891208243665	8.7202445779737	67.3235417941003	8.2349389338548	1.21385529114513	76.7723360191003	0.03422	0.03001	0.06064	203	59	0.09011	10.94350	2.48454	0.38368	338.15407
126902	5130378	3	8	NO	7.7	32.7	2.4193914313871	2.9275786262472	9.1653114169138	1521747258.118	FALSE	0.99400472640991	2.43398383036399	1.1499084674783	1.15684406414391	0.46570911580609	0.46851800945466	1.5605387791456	1521747257.341	0.7770037651062	2.0084056850514	0.46479506278401	1.0991225118021	1.4145652327076	0.20136808949373	11.90429084835	92.0821417083162	20.8012617714492	3.41187108468962	116.295274564455	0.02808	0.02224	0.03979	80	40	0.03209	7.64691	3.76360	0.14404	236.28946
146087	5934773	3	8	NO	4.91	5.7	2.62169975261799	3.7543838698973	5.73468438910386	1537652082.97182	FALSE	1.08000993728638	2.42747743525883	0.527059785462745	0.48801382956441	0.425638696935962	0.394106278323158	1.24220664761059	1537652082.48582	0.486004590988159	2.55595661161327	0.423770174479386	0.653577253008538	1.344796458979260	0	6.53151796425454	84.29680908633320	3.40694396846729	2.22191499145977	89.9256680462603	0.06027	0.05650	0.08222	208	57	0.10910	11.49181	2.91022	0.47074	355.09704
121170	4896277	3	8	NO	6.34	34.9	3.3506776799917	7.6292891662618	7.7283359351485	1516646642.3641	FALSE	1.382009267807	2.42449725775618	1.1406341520751	0.825344792285714	0.50021521894431	0.361947803532506	1.8460641008883	1516646641.1981	1.1660079956055	1.5832345128385	0.35715272073106	0.85908536330574	0.736774847636978	0.56135924558142	11.255798980936	65.7144568689547	7.61532353597494	1.46456759009929	74.7943479950289	0.03532	0.03103	0.05248	33	7	0.02392	3.72818	2.42053	0.14903	115.20084
130362	5275460	3	8	NO	6.418	11.3	3.3772629623126	7.7417872463732	5.7358752237704	1523460688.5265	FALSE	1.3930180072784	2.4244216116853	1.1978186484208	0.8598730541618	0.70981853176373	0.509554455186501	1.2901634932678	1523460687.8895	0.63700819015503	2.02534836004826	0.41381470728232	0.53024388352539	0.83239727796332	0	8.3887534738178	65.1910606048598	8.2005018819488	2.87973788228614	76.2713003690947	0.06591	0.05633	0.05264	99	17	0.03670	6.23195	2.46833	0.19368	192.56734
119055	4806871	3	8	NO	5.37	10.6	2.5625265159451	3.3432253941725	6.6370269804326	1514746851.0407	FALSE	1.0580124855042	2.4220191642861	0.75189042360046	0.710663091317059	0.4075294912795	0.3851840095113	1.3854746661501	1514746850.3167	0.72400832176208	1.91361704624907	0.2210352090173	0.52533052213561	0.72558630383843	1.7062070104923	6.2165884169054	85.6629135277349	7.37505413265366	2.1665773076277	95.2045449680163	0.04667	0.04199	0.07129	78	11	0.04580	5.97357	3.08105	0.23279	184.58317
146087	5934773	3	8	NO	4.91	5.7	3.15097211195702	6.56846244497838	5.76835407361571	1537652078.72778	FALSE	1.30701231956482	2.41082051392305	0.658606665033795	0.503902415589383	0.521453715280653	0.398966182242471	1.26155548442341	1537652078.23078	0.497004508972168	2.53831798635464	0.291049766520465	0.710903232031361	1.430375819932800	0	6.65106563903165	68.70345207062760	3.00152305209717	1.88157256694698	73.5865476896718	0.05899	0.05508	0.08142	200	64	0.11103	10.92164	2.38144	0.51538	337.47865
119055	4806878	3	8	NO	5.37	10.6	3.00733536236	6.7915204310354	6.6386389766202	1514748215.3538	FALSE	1.2740149497986	2.36051811074541	1.2335705617618	0.9682543850500	0.71754049273163	0.563211988089356	2.0481778868561	1514748214.6198	0.73400855064392	2.79040058192688	0.5489639831885	0.98602202090154	1.34333860284943	0	7.2664907281323	67.5722893746152	11.3692784878192	3.8467834606459	82.7883513230803	0.04884	0.03986	0.07464	164	38	0.10487	9.21247	2.67923	0.40454	284.66517
126340	5106495	3	8	NO	6.62	38.6	1.5034652728431	1.1968392810266	9.139141271376	1520998138.0898	TRUE	0.63701248168945	2.36018181128208	0.83637061213926	1.31295796578598	0.11130954586501	0.17473683650562	0.78870520735093	1520998137.5818	0.5080099105835	1.55253901729008	0.13809750174735	0.25540857887897	0.50276298465439	0.44103990668826	8.7271380815737	135.105011896135	41.81019437349330	0.74054163294128	177.65574790257	0.02765	0.02103	0.05270	73	8	0.01916	8.37053	5.74938	0.13792	258.64952
126341	5106521	3	8	NO	5.12	8.2	2.3174759272222	2.5161987968991	7.1074520507099	1521153865.3526	FALSE	0.98201060295105	2.3599296384967	0.91414030767003	0.93088639259387	0.28977723248097	0.29508564531804	0.84890756397075	1521153864.7366	0.61600637435913	1.37808243438052	0.28673544713638	0.36350008465785	0.59009143377132	0	7.2880231506375	87.6214460166184	13.63344689219820	1.36996185090201	102.624854759719	0.04071	0.03476	0.07846	48	9	0.02703	5.14530	3.32119	0.19779	158.98966
125540	5073567	3	8	NO	7.57	34.1	2.9632262551432	6.217179955395	7.4905657671693	1520383152.2973	FALSE	1.2630093097687	2.3461634306448	1.4915272335656	1.1809313059131	0.54938156887802	0.434978241750752	1.7964813117936	1520383151.2063	1.0910079479218	1.6466253203889	0.38957683499655	0.73866767414144	0.677050681022523	0.67628287950367	12.038290397766	67.3346263334187	17.0596926798665	2.3144990074083	86.7088180206935	0.03983	0.03093	0.03900	38	6	0.01744	4.25879	2.80611	0.11032	131.59665
126340	5106497	3	8	NO	6.62	38.6	3.5886519934755	8.1106497428464	8.6344451883991	1520998768.6011	FALSE	1.533029794693	2.3408886154063	0.92161046315091	0.60116930952113	0.56693681604163	0.369814610260176	1.5424072722638	1520998767.8991	0.70201373100281	2.19711838123238	0.20877555901482	0.8486883833127	1.20893416443631	0.079315276041873	9.4136990318707	55.2254657532074	3.64226458115865	1.37830717799864	60.2460375123647	0.02528	0.02318	0.04301	106	32	0.04525	6.42886	1.94971	0.20676	198.65180
125540	5073571	3	8	NO	7.57	34.1	3.5792928884244	8.1088287619205	6.4860577476034	1520386444.5634	FALSE	1.5330111980438	2.3348119654910	0.86835316436896	0.566436282707538	0.51327597622475	0.334815542691219	2.4861262649887	1520386442.4684	2.0950152873993	1.1866864551976	0.35351187496546	0.93371795639789	0.445685509797394	2.7960945593648	9.5849472504928	54.9397877405361	3.23359246814632	1.12978128800151	59.3031614966839	0.04410	0.04086	0.03238	10	1	0.00884	2.30269	1.91920	0.09193	71.15319
125540	5073572	3	8	NO	7.57	34.1	2.0657019128427	2.0146655171944	10.992631160341	1520388007.2588	FALSE	0.88600659370422	2.33147464987411	1.4084114875028	1.58961738830239	0.82688700050368	0.93327409342026	1.9098606256628	1520388006.1258	1.1330082416534	1.6856546629138	0.82270909633427	0.68570676203722	0.605208979801036	0.84614315573318	8.9723761718503	94.7879051478853	44.0632715871973	15.18832742037790	154.039504155461	0.02305	0.01418	0.04861	39	5	0.01765	6.40067	4.98510	0.14221	197.78068
120454	4866360	3	8	NO	6.2	20.4	3.4005938440229	7.7727220913288	8.4377654793341	1515549487.573	FALSE	1.4790170192719	2.2992256341289	1.2347153148337	0.8348215732105	0.61667539246661	0.416949490392065	1.3170460728091	1515549486.946	0.62700724601746	2.10052767519759	0.4149480587606	0.59124908714518	0.94297010265925	0.51297934022569	8.8599547630206	55.2228094861456	7.2801887488489	1.81602660616271	64.3190248411572	0.02727	0.02341	0.05050	109	22	0.04349	6.30907	2.08152	0.21798	194.95032
119055	4806881	3	8	NO	5.37	10.6	1.5521819738567	1.3726712860343	7.4273251674353	1514749434.7002	TRUE	0.68100810050964	2.27924157244988	1.3986969064965	2.05386236294366	0.96721320807668	1.42026681819622	0.71448253672619	1514749434.3552	0.34500408172607	2.07093937309844	0.96048574839578	0.59437815297776	1.72281484324493	0.11441537712266	6.4393938998186	117.857417685935	95.7015295598347	45.76316863985430	259.322115885624	0.06533	0.02969	0.12498	192	133	0.07935	18.90940	8.39230	0.42427	584.30033
125540	5073570	3	8	NO	7.57	34.1	2.0413145343172	1.785677377458	9.5886521172792	1520384556.2666	FALSE	0.89600658416748	2.27823608708621	1.3835139380203	1.5440890306691	0.8356017778334	0.932584416898895	3.068514936496	1520384554.3016	1.9650144577026	1.56157371996314	0.83424465920114	0.68328894496807	0.347727184545471	1.4730170607559	10.357447936367	89.4982897395372	41.1113708213432	14.9966270557196	145.6062876166	0.02896	0.01780	0.04646	19	1	0.01408	5.36343	4.71218	0.16886	165.72988
120454	4866365	3	8	NO	6.2	20.4	3.7494854440598	8.511607637952	0.64449709355	1515552642.7434	FALSE	1.651967048645	2.26970958478576	1.4214514239968	0.860459913630071	0.66372713024626	0.401779884647622	1.3651899438652	1515552642.1284	0.61498761177063	2.21986576271779	0.65206786906072	0.46817829630665	0.76128085728215	0	0.64207393784876	48.1800988548652	6.92449950631924	1.50974459310547	56.6143429542899			0.04965	124	15	0.04517	6.30979	1.83218	0.23466	194.97257
126590	5116763	3	8	NO	5.64	10.4	2.2657499904993	2.6621669102297	4.2036210080403	1521319426.7307	FALSE	1.0040125846863	2.2566948114572	1.7101288260653	1.7032942137868	1.2300352654605	1.2251193702366	1.7471436104218	1521319425.8347	0.89601135253906	1.94991235933658	1.2263709157384	0.67139624176302	0.74931666865655	0	8.534268820507	78.3673187402097	44.6445725829450	23.0964982767394	146.1083895998940	0.16942	0.09087	0.09412	66	10	0.04325	7.16346	4.72843	0.26983	221.35090
126903	5130391	3	8	NO	7.68	32.7	2.8671778245068	5.5732315059929	6.6699759497037	1521756169.5992	FALSE	1.2739980220795	2.2505355383730	1.2834545541182	1.0074227211305	0.59781790766396	0.469245553998713	1.8364081711424	1521756168.5732	1.0259981155396	1.7898747993086	0.59592194935176	0.67342988989185	0.656365620649971	0	11.975262540302	61.4230645419159	12.3078788636798	2.67030004421585	76.4012434498116	0.04465	0.03590	0.03368	48	6	0.01943	4.24372	2.47253	0.10436	131.13090
126341	5106526	3	8	NO	5.12	8.2	1.4080011972751	1.2504601003251	5.4141063437797	1521154478.4701	TRUE	0.62600684165955	2.24917860888305	0.36223511651916	0.57864402177917	0.94154859658904	1.50405480248904	0.24102131215045	1521154477.8221	0.64800691604614	0.37194249965889	0.93469263662723	0.21325094411732	0.32908745082303	0	6.779132329313	124.852514389864	8.26365819288977	55.83116954872420	188.947342131478	0.08235	0.05442	0.09208	3	3	0.00297	6.30511	6.11480	0.19324	194.82781
119055	4806878	3	8	NO	5.37	10.6	1.8438428063142	1.5168211064877	5.9915403167099	1514748210.3758	FALSE	0.82100987434387	2.24582293579325	0.55445054912736	0.67532750391152	0.61466524805168	0.74866973864706	1.8416817958052	1514748209.7498	0.6260073184967	2.9419493053657	0.52252350766348	0.71165016437506	1.13680805854478	0.40467948078117	6.2012636562239	94.9141863157517	8.58240447548141	10.54777025710340	114.044361048337	0.05323	0.04430	0.06626	214	32	0.10877	11.63587	3.69076	0.36820	359.54837
125540	5073565	3	8	NO	7.57	34.1	2.6864476210576	4.5908443730166	8.6264687343488	1520382004.6479	FALSE	1.1980087757111	2.2424273306871	1.3707427643873	1.1441842432028	0.58018128597315	0.484288010017934	1.2373701542059	1520382003.9999	0.64800477027893	1.90950778598942	0.56397789291331	0.72520137053525	1.11912967897303	0	11.308177703033	64.8492921974720	16.8834194357002	3.0246555097623	84.7573671429345	0.02785	0.02131	0.03616	87	30	0.02695	6.52277	2.74296	0.13251	201.55353
126340	5106496	3	8	NO	6.62	38.6	3.8796826308274	8.6866933512507	8.881496489549	1520998440.2487	FALSE	1.7380337715149	2.2322251123152	1.0998144835967	0.6327923551440	0.64375598823663	0.370393256326384	1.879308202437	1520998439.1257	1.1230218410492	1.67343869348189	0.6404835561921	0.90423516088357	0.805180387265465	1.894918235813	10.106157830882	44.2941377612465	3.5595305145686	1.2195410259968	49.0732093018119	0.02207	0.01992	0.03972	39	9	0.02481	3.12359	1.58813	0.12860	96.51895
118613	4791197	3	8	NO	6.84	35	3.0097030537663	6.4165764747388	7.4056618162836	1514425676.6876	FALSE	1.3500192165375	2.2293779354382	1.0109710395603	0.7488567771303	0.32883916817725	0.243581101771758	2.3137898759558	1514425674.7765	1.911027431488	1.21075701888496	0.32760352991717	1.0187118579992	0.533070243374786	3.8489292077517	9.8101662622906	56.8795209988088	6.4177982775138	0.679009287267316	63.9763285635899	0.03214	0.02857	0.03767	12	2	0.01179	2.52833	2.07043	0.11113	78.12526
130362	5275449	3	8	NO	6.418	11.3	1.5570236234152	1.3401857766508	8.6664272081633	1523456864.6953	TRUE	0.70200896263123	2.21795405229479	0.79162204056252	1.12765232739395	0.60444793710962	0.86102595448933	0.26821733192814	1523456864.3603	0.3350043296814	0.800638404235621	0.24630131958154	0.36070521197627	1.07671806008989	0	10.177076943668	108.265707130906	27.98570604523720	16.31617342044930	152.567586596593	0.02910	0.02065	0.05307	30	53	0.01378	7.62451	4.93746	0.12105	235.59729
126341	5106519	3	8	NO	5.12	8.2	1.668556160105	1.4035805772296	7.2395499192627	1521153671.2375	TRUE	0.75600790977478	2.20706177611564	1.1021731459679	1.45788573335991	0.73020973773686	0.96587579084245	1.4754713038343	1521153669.2295	2.0080215930939	0.7347885644800	0.72574646547656	0.40909051695237	0.203728146330367	0	6.1032203907308	99.5476754124131	43.4359291928421	19.06534664938580	162.048951254641	0.04770	0.02930	0.09538	4	0	0.00699	5.38908	5.24430	0.35833	166.52247
120454	4866364	3	8	NO	6.2	20.4	1.380255918192	1.167720613095	6.365527845022	1515551092.1765	TRUE	0.62600708007812	2.20485672146033	0.92107578994119	1.47135043556736	0.71416468078964	1.14082524545971	1.4338921049371	1515551091.5065	0.67000770568848	2.14011285655838	0.71460394633251	0.40839954708369	0.60954455242277	1.1924691554579	5.1145338965839	119.980311318739	53.42954588692490	32.12088370625000	205.530740911914	0.06480	0.03783	0.06831	106	9	0.04062	10.34668	6.65148	0.21998	319.71248
126340	5106497	3	8	NO	6.62	38.6	3.4489740456258	7.9388077801715	9.4170581812483	1520998759.9099	FALSE	1.56503033638	2.20377456299247	1.0221420908778	0.653113276540102	0.68806663441203	0.439650669011034	1.4523431704022	1520998758.9919	0.91801786422729	1.58204238391881	0.26347843914451	0.68957810188055	0.75115978539370	4.5027066237175	6.0269422448932	47.9446392630133	4.2109758227018	1.90818817491948	54.0638032606346	0.01947	0.01727	0.03940	42	9	0.02207	3.42014	1.74964	0.12220	105.68228
130362	5275456	3	8	NO	6.418	11.3	1.6133910647839	1.3731578455913	11.320910620895	1523458934.073	TRUE	0.73500943183899	2.19506171607513	0.95243657832943	1.29581545089352	0.4352229123563	0.592132418311115	0.27088302154789	1523458933.685	0.38800477981567	0.69814351688291	0.43402688840445	0.17753806611698	0.45756669853738	0	12.321621493986	101.281247570178	35.29570652441240	7.37009776736843	143.947051861959	0.01685	0.01185	0.05242	19	8	0.00533	5.55637	4.65848	0.09553	171.69187
126903	5130391	3	8	NO	7.68	32.7	3.1426542886739	6.9985510080214	6.6733292569372	1521756174.7602	FALSE	1.4359977245331	2.1884813847429	1.4179693324134	0.9874453894935	0.56493425724869	0.39340888052756	1.2682953592489	1521756174.0792	0.68099880218506	1.86240468438334	0.56140707577601	0.51809179576297	0.76078224234847	0	9.4179835495186	51.5300359836358	10.4906139333422	1.66518714799619	63.6858370649742	0.04191	0.03391	0.03164	79	13	0.02164	5.03265	2.06103	0.11391	155.50893
146087	5934774	3	8	NO	4.91	5.7	2.12088792857195	1.89007148141738	5.16122053654414	1537652483.42958	FALSE	0.972008943557739	2.18196338894691	0.548930057013173	0.564737660750305	0.319029535882329	0.328216667137465	0.516371507606438	1537652482.94357	0.486004590988159	1.062482777285160	0.265187183877143	0.213239968732131	0.438761223013480	0.357105446637018	4.97062913043433	75.6751240324549	5.069343544794840	1.712298535005800	82.4567661122555	0.06140	0.05635	0.06785	36	6	0.01728	4.02794	2.66850	0.15362	124.46324
126902	5130386	3	8	NO	7.7	32.7	2.2118393113499	2.5488856162524	9.4619477297695	1521750630.9193	FALSE	1.0150048732758	2.1791415682680	1.1976125974555	1.1799082240762	1.2677897434339	1.2490479374176	2.6069947257203	1521750629.6673	1.2520060539246	2.0822540893858	1.2647734426337	0.83878411539743	0.669952124247431	3.7296275206918	10.692586329883	72.2821807446801	21.1912616015125	23.7475368065954	117.2209791527880	0.02712	0.01672	0.04095	54	6	0.02544	5.70434	3.79356	0.13754	176.26410
122199	4938015	3	8	NO	5.77	14.4	2.0066470632204	1.7701562385389	8.4445179023912	1517436787.3882	FALSE	0.92525839805603	2.16874233990891	0.85169038163004	0.92048922054579	0.45319070284482	0.48979906996464	0.67343756149319	1517436787.0227	0.3655219078064	1.84239999603493	0.29363503684267	0.22396214599521	0.612718803475474	0	8.5219438295953	78.5382761269617	14.14825446268000	4.00591159170566	96.6924421813474	0.02560	0.02080	0.05484	143	16	0.03570	8.28603	3.12921	0.20259	256.03821
119055	4806881	3	8	NO	5.37	10.6	1.6131401596564	1.2201526430859	4.1937143158008	1514749430.9752	TRUE	0.74500870704651	2.16526349880055	0.67509801449709	0.90616124095170	0.35255916364584	0.47322824594026	0.7518683174062	1514749430.2412	0.7340087890625	1.0243314911345	0.37021735800214	0.17875353951945	0.243530516504795	2.6235000824524	5.2118538818227	97.2273938708545	17.02856689677100	4.64417368058958	118.900134448215	0.10279	0.08405	0.06269	22	1	0.01212	4.60304	3.84790	0.14888	142.23403
118613	4791198	3	8	NO	6.84	35	2.7258701253854	3.874291317604	6.5608278800917	1514425846.661	FALSE	1.2630181312561	2.1582193144563	0.67352777522634	0.533268492793925	0.80163991606899	0.634701827496127	2.0303061519658	1514425845.29	1.3710196018219	1.4808731758961	0.53502193792998	1.317058874389	0.960641899385542	0	12.584608848111	56.9783735740940	3.47865010866	4.92786039867542	65.3848840814294	0.03915	0.03412	0.03602	25	10	0.02100	3.25233	2.11602	0.11547	100.49699
146087	5934776	3	8	NO	4.91	5.7	2.11220422597274	1.81143272684968	5.22219274196421	1537653574.39681	FALSE	0.982009172439575	2.15090070974129	0.678081089285854	0.690503824522655	0.540329493832912	0.550228560992550	1.31140540777867	1537653573.6948	0.702006578445435	1.86808136567997	0.490747451548101	0.526449341564223	0.749920809474498	0.0370394089240298	5.14975951314136	72.7869740853225	7.501448225948890	4.763204186329700	85.0516264976011	0.06250	0.05349	0.07070	77	12	0.05300	5.63857	2.75248	0.24838	174.23183
121170	4896281	3	8	NO	6.34	34.9	2.9705138935486	5.7379997322657	8.0381370926285	1516648048.0715	FALSE	1.3820095062256	2.1494163970416	1.1413530372989	0.8258648237638	0.54376429978519	0.393459160255896	1.537402955412	1516648047.4235	0.64800429344177	2.37251970545802	0.54208680682187	0.78574013589819	1.21255390411822	0	10.831658436002	51.6486017484428	7.6249217372928	1.7306799996091	61.0042034853447	0.02663	0.02255	0.04281	134	35	0.05569	7.45194	1.97425	0.23733	230.26491
146097	5934973	3	8	NO	7.44	37.6	3.49313975411042	7.94154062627628	8.58289122296711	1538258499.15407	FALSE	1.63871693611145	2.13163095903517	1.14366471217069	0.69790254007170	0.558899065071065	0.341058942368222	1.48425176104573	1538258498.51696	0.637112379074097	2.3296545629874	0.357654778927671	0.681077695537243	1.069007160914120	0.264039577328587	6.53679190887961	42.83991297168490	4.59212921139508	1.09668883863536	48.5287310217153	0.02203	0.01945	0.02932	132	28	0.03742	6.72664	1.57051	0.17440	207.85310
126591	5116777	3	8	NO	5.47	9.7	2.4353283794869	2.5495646057354	5.5089158077597	1521394278.3788	FALSE	1.1440267562866	2.1287337609059	0.67639094171918	0.591236995115988	0.37629050814062	0.328917576510206	1.184878581669	1521394277.7737	0.60501408576965	1.95843139777761	0.37384421980942	0.56523618132616	0.93425292835474	0.4683029561469	5.8821493385772	61.1976855687590	4.72079894041479	1.46105466531875	67.3795391744925	0.05184	0.04708	0.05258	98	22	0.04962	6.07162	2.18057	0.22382	187.61303
119736	4837564	3	8	NO	7.0	21.7	2.2503249113254	2.7843509437067	10.89966004912	1515447696.177	FALSE	1.0580234527588	2.1269140163743	0.98276675160651	0.928870479235543	0.45505318221126	0.430097443515744	0.038553157870355	1515447696.037	0.14000296592712	0.275373865225286	0.41502209913193	0.11739243366887	0.83849961957220	0	11.129536814643	66.0591613242303	12.5992156775052	2.70126325767437	81.3596402594099	0.01479	0.01201	0.03585	8	78	0.00501	5.41477	2.63300	0.08349	167.31636
126903	5130393	3	8	NO	7.68	32.7	2.9986686539173	6.1514575253319	7.600159765202	1521757173.5615	FALSE	1.4139976501465	2.1207027137610	1.0057014596789	0.7112469101874	0.39941587804243	0.282472801847335	1.0224603393733	1521757172.9995	0.56199884414673	1.81932818905647	0.48947331024601	0.53446482472216	0.95100698211155	0	9.264522447841	49.1404784125110	5.5273960202264	0.871832534040706	55.5397069667781	0.02775	0.02455	0.02717	91	25	0.02253	5.54685	1.79740	0.11719	171.39761
146087	5934773	3	8	NO	4.91	5.7	3.04405883721272	5.91419053102356	6.87172883595416	1537652074.81875	FALSE	1.4360134601593	2.11979826211033	0.858097802448894	0.597555542657451	0.48447289389152	0.337373504728693	1.03820007434083	1537652074.31074	0.508004665374756	2.043682164956	0.0737484071993141	0.63005744473743	1.24025917020395	0.364560376498011	7.63763412638451	48.3458317830871	3.84172727722894	1.2245934115134	53.4121524718294	0.03315	0.03000	0.06493	127	47	0.07474	7.35338	1.72855	0.37393	227.21939
125540	5073571	3	8	NO	7.57	34.1	2.6971083412509	3.9026706332712	9.9029290879479	1520386438.0313	FALSE	1.2740092277527	2.1170241804359	0.79261504599343	0.62214231163111	0.31923940043099	0.250578562130288	0.928005246998	1520386437.4803	0.55100393295288	1.68420802738147	0.18422216995306	0.58351242841679	1.05899866320317	0.38912669539339	8.920711482382	54.3510010140532	4.69391679724245	0.761454111137115	59.8063719224328	0.01586	0.01441	0.02714	80	31	0.02178	5.52714	1.93548	0.11100	170.78859
119056	4806894	3	8	NO	5.14	11.5	2.3999396869532	2.5786089563061	6.7920467450839	1514767395.115	FALSE	1.1340148448944	2.1163212260918	0.80709809067626	0.71171739445035	0.26554480721851	0.234163431293739	1.2447302244342	1514767394.5649	0.55000710487366	2.26311662777542	0.2030398824915	0.66671575823529	1.21219481044420	0.35081344112405	6.9311819282928	61.0201006459893	6.90120461913365	0.747046939282015	68.668352204405	0.03445	0.03061	0.06015	144	41	0.07866	8.21412	2.22228	0.33018	253.81632
118613	4791199	3	8	NO	6.84	35	1.8901352212549	1.6221328845614	7.3334333372979	1514425977.8149	FALSE	0.89601278305054	2.10949582082947	0.51557238772886	0.57540740208366	0.47578388224649	0.53100122146321	1.3117717342559	1514425976.8639	0.95101380348206	1.37934037282419	0.31326711660822	1.1274054630578	1.18547749667765	0	11.603754206985	76.7311340308419	5.70906735665305	4.86189212260780	87.3020935101028	0.02968	0.02609	0.03412	31	23	0.02229	4.56447	2.82531	0.11364	141.04224
146087	5934789	3	8	NO	4.91	5.7	1.6535596924958	1.42037244003777	7.05879632928497	1537656106.24555	TRUE	0.788007259368896	2.09840667434982	0.942743344537481	1.196363781334340	0.370681998863652	0.470404294448412	0.143707949745164	1537656105.99655	0.249002456665039	0.577134666339785	0.166466138573188	0.634025759372876	2.546263068503680	0	8.02011476129396	86.3331492348858	28.062397941383400	4.338512181190630	118.73405935746	0.03832	0.02786	0.07920	21	402	0.08915	17.53022	3.84253	0.47552	541.68388
122199	4938015	3	8	NO	5.77	14.4	3.6112401350077	8.0328887797919	5.9298976728194	1517436788.915	FALSE	1.721040725708	2.09828860006907	0.82065304536926	0.47683534335404	0.6027817284449	0.350242570928662										39.5246268689224	2.04114666939712	1.10122281557395	42.6669963538935	0.04262	0.03948	0.04501				1.38081	1.38081	0.04501	42.66700
126903	5130391	3	8	NO	7.68	32.7	3.0954839998715	6.9246620758993	7.7787785566824	1521756186.0642	FALSE	1.4789974689484	2.0929609853034	1.0830674133901	0.7322983548851	0.69179453723527	0.467745585614255	3.1098058456254	1521756183.9152	2.1489963531494	1.4470968464269	0.30808983331291	0.90393790445517	0.420632591177007	3.4375953788139	6.7505205174388	45.7597158004978	5.6019234506582	2.28549590765391	53.6471351588099	0.02676	0.02283	0.02745	15	1	0.01214	2.26454	1.73615	0.08784	69.97442
125540	5073565	3	8	NO	7.57	34.1	2.5404271306695	3.4477861026724	8.6865546593487	1520382024.2871	FALSE	1.2200088500977	2.0823022148291	0.95611087334302	0.783691752126596	0.37011307290221	0.303369170537223	0.70712263952786	1520382023.7801	0.50700378417969	1.39470880019555	0.36651884877773	0.32343441558274	0.63793294187349	0.25390538697714	9.5570512039539	54.9101999006911	7.77778716733652	1.16548956879072	63.8534766368183	0.02107	0.01812	0.02774	59	12	0.01294	4.38613	2.06646	0.08336	135.53153
122199	4938009	3	8	NO	5.77	14.4	2.1023539209597	1.8919932901527	6.0552132622498	1517435463.1391	FALSE	1.0109121799469	2.0796602936074	0.87280413522011	0.863382747318324	0.46638773502168	0.461353364093583	0.39982818510783	1517435462.6013	0.53782510757446	0.74341673431911	-0.066839957742691	0.2192051238317	0.407576962742209	0	6.892005546905	66.0997557445428	11.392572124192	3.25298782682778	80.7453156955626	0.04543	0.03719	0.05004	16	5	0.00681	3.28135	2.61312	0.09626	101.39379
120454	4866364	3	8	NO	6.2	20.4	1.7244225788085	1.3689229097551	6.1516227330382	1515551086.6585	TRUE	0.83100962638855	2.07509338526269	1.0587387925296	1.27403914336195	0.75848756440216	0.91273017822722	1.1824973263865	1515551085.6975	0.96101117134094	1.2304719878922	0.75657871149865	0.44916207797992	0.46738486645601	0.32127661035417	9.2765670012894	80.0567068078836	30.1778275105317	15.48842472481000	125.722959043225	0.05634	0.03588	0.05547	24	4	0.01421	4.97010	4.06870	0.14611	153.57620
125540	5073570	3	8	NO	7.57	34.1	2.2408659614697	2.2700383063435	6.1111798504813	1520384539.2185	FALSE	1.0900077819824	2.0558256541933	1.0736788714309	0.9850194550705	0.48642051150555	0.446254164003211	1.8745210340479	1520384537.2854	1.9330141544342	0.9697399420216	0.48447732414282	0.69414196043001	0.359098229486678	0.057414963994798	12.944647095093	59.9061552496682	13.7527168593581	2.82269171350131	76.4815638225276	0.04556	0.03568	0.02969	8	1	0.00588	2.75173	2.47513	0.09154	85.02853
125540	5073565	3	8	NO	7.57	34.1	3.5947849245641	8.2455908740317	7.1741504506215	1520382009.42	FALSE	1.7490127086639	2.0553223580120	1.3243173072976	0.7571799225571	0.63257376712736	0.36167476885322	1.2158640821908	1520382008.88	0.54000401496887	2.25158341139536	0.62929352700955	0.61649122453016	1.14164192754326	0	10.936344381754	37.3160281253329	5.0644664437156	1.15550530516761	43.5359998742161	0.03019	0.02588	0.02712	145	37	0.03507	7.30979	1.40893	0.18413	225.87252
126902	5130384	3	8	NO	7.7	32.7	2.3260362866362	2.4253562661	8.8629755599713	1521749877.7536	FALSE	1.1330053806305	2.0529790294039	1.0152398782802	0.8960591852752	0.29991130268253	0.264704217481857	0.75930662356095	1521749877.3756	0.37800192832947	2.00873743400359	0.29842231619329	0.35243010305529	0.93235001369651	0	9.2807716495274	57.4732210840634	10.9488852333783	0.955472590894948	69.3775789083366	0.02042	0.01692	0.02706	165	36	0.02608	8.73237	2.24523	0.14034	269.83020
126591	5116773	3	8	NO	5.47	9.7	3.0486165873742	5.5459109560508	6.2895000798087	1521393272.1062	FALSE	1.4900348186493	2.0460035894582	0.85760932305746	0.575563276994341	0.37224987149601	0.249826290524842	1.4668241885103	1521393271.4262	0.68001580238342	2.1570442677496	0.36892670633689	0.72904548074835	1.07210079264788	6.3621921605626	6.1795727732951	43.4055085970412	3.43493260152641	0.647155051975217	47.4875962505428	0.03650	0.03337	0.04826	106	26	0.06114	5.80307	1.53682	0.26541	179.31484
126902	5130388	3	8	NO	7.7	32.7	1.6781426771644	1.3258217439163	8.8258941743301	1521751443.2642	TRUE	0.82100391387939	2.04401300504754	1.0249857506652	1.24845415878952	0.39716387086887	0.48375393119894	1.5965022994741	1521751442.3142	0.95000457763672	1.68052063859065	0.39361330010203	0.99954946487672	1.05215226158515	0	12.607652414169	78.6231728070622	29.3311071918834	4.40384749428278	112.358127493228	0.02417	0.01691	0.03175	46	18	0.02091	5.70521	3.63619	0.10747	176.29112
146097	5934991	3	8	NO	7.44	37.6	2.53656055250775	3.77151143321852	8.83785171031692	1538254873.84842	FALSE	1.24200558662415	2.04231009894431	1.0767576456916	0.866950726540849	0.501229635292755	0.403564718782891	1.05284070346181	1538254873.36242	0.486002206802368	2.16632905926278	0.498390531820221	0.951956705297952	1.958749758692070	0	10.4973575514361	51.88577454149770	9.34961578419374	2.02596210339512	63.2613524290866	0.02053	0.01684	0.02897	149	122	0.04859	10.82265	2.04729	0.21306	334.41977
119055	4806871	3	8	NO	5.37	10.6	3.2823456015053	7.1963812795784	5.4851713023268	1514746855.0468	FALSE	1.6080191135406	2.0412354392219	0.97488859218207	0.606266793704661	0.64933455568866	0.403810222292028	1.1781236921809	1514746854.5388	0.50800585746765	2.31911438591222	0.37698405254219	0.59750202138912	1.17617151968995	0.22194429730958	7.4594378042111	40.0334922552889	3.53154578246721	1.56672182950507	45.1317598672612	0.04923	0.04367	0.05136	164	42	0.07393	8.11569	1.46057	0.37554	250.77470
126903	5130389	3	8	NO	7.68	32.7	2.2212568755426	2.0544168507733	4.68934497688	1521754552.1379	FALSE	1.09099817276	2.03598588063927	1.1129185848545	1.02009207040104	0.49853640998343	0.456954395003464	0.5704367433011	1521754551.3829	0.75499892234802	0.75554643379763	0.49623476733208	1.2068860804615	1.59852689154592	0	5.8321844201501	58.7021468222922	14.7361218444549	2.95699219379466	76.3952608605418	0.07735	0.05944	0.02884	12	52	0.01671	4.54263	2.47234	0.08966	140.36733
130362	5275458	3	8	NO	6.418	11.3	2.5830598826275	2.9796487866693	6.9626844503933	1523459328.671	FALSE	1.2740163803101	2.0274934628382	1.0183211285626	0.7992998711011	0.47204186455948	0.370514753071372	1.6375679756401	1523459327.505	1.1660151481628	1.4044139805733	0.47170174556145	0.61967926118982	0.531450437986334	0.92616470938317	8.7184927578116	49.8508304078072	7.7477028862893	1.66480925868978	59.2633425527863	0.03178	0.02674	0.03741	26	4	0.01726	2.88480	1.91791	0.10776	89.14026
130361	5275444	3	8	NO	5.79	5	1.5708905749656	1.398735822574	7.458784543052	1523370027.4277	TRUE	0.77700138092041	2.02173459859849	1.4914973567445	1.919555606166	0.39534846968812	0.50881308501640	0.7074261573781	1523370026.7907	0.63700103759766	1.1105573077966	0.35802909340669	0.3007748174269	0.472173198588845	0.14594252611755	6.964041693706	81.2746260334487	73.2669457888706	5.14781861454134	159.689390436861	0.04552	0.02317	0.07553	30	5	0.01370	6.31102	5.16794	0.16786	195.01053
146087	5934782	3	8	NO	4.91	5.7	3.17988839554345	6.68044503958713	6.39261276092211	1537654709.28845	FALSE	1.57701468467712	2.01639745427894	1.01524280796964	0.64377511372223	0.974573996569394	0.617986633884091	1.39261197034459	1537654708.72645	0.562005281448364	2.47793395598639	0.970723788583594	0.445588148975464	0.792854024124333	0	7.39646325169544	39.83318445086660	4.06032797069590	3.74154446250171	47.6350568840642	0.03752	0.03137	0.06359	169	17	0.08853	7.56357	1.54159	0.42320	233.71438
121170	4896304	3	8	NO	6.34	34.9	2.9364601147627	4.9157784719318	8.6156498760951	1516646437.3468	FALSE	1.4570088386536	2.0154030894392	0.95152594671155	0.653068067583475	0.49850209034803	0.342140745562455	1.3098638065298	1516646436.6338	0.71300435066223	1.8371049283405	0.49700937575365	0.87616371108614	1.22883361128494	0	12.255919910777	43.0715139501986	4.52254810955788	1.24129753301983	48.8353595927763	0.01956	0.01725	0.03613	73	33	0.03832	5.00607	1.58043	0.17043	154.68751
121170	4896272	3	8	NO	6.34	34.9	2.9961901504622	6.3449653174353	7.9564389700731	1516649793.9431	FALSE	1.4891390800476	2.0120284200495	1.105484749957	0.742365011279983	0.52797944825691	0.354553483506748	1.4514656991509	1516649792.9827	0.960444688797	1.51124340222957	0.52548900606798	0.52613006642915	0.547798402725462	0.74439834907953	10.722064605862	42.0011754091469	5.71779015013594	1.30423765901	49.0232032182928	0.02353	0.02016	0.03706	37	5	0.02027	2.93169	1.58651	0.11267	90.58923
126903	5130390	3	8	NO	7.68	32.7	2.7431330484451	4.3569336325033	8.2404417474862	1521754802.9485	FALSE	1.3709979057312	2.0008294957840	1.0408831496109	0.7592157108772	0.35056236017523	0.255698683936547	1.5204389513777	1521754801.9005	1.0479981899261	1.4508030319069	0.35404205647068	0.84781380097678	0.808984031772578	0.11419221669518	12.108753679096	45.1140539394496	6.4956417660841	0.736798406413015	52.3464941119467	0.02157	0.01859	0.02483	31	10	0.01475	3.01052	1.69406	0.07786	93.02495
130360	5275432	3	8	NO	5.93	8.9	2.9514563437662	6.4053640107749	7.0934374620973	1523349839.7462	FALSE	1.479026556015	1.9955397905217	0.658400401602	0.445157931022	0.71864866167913	0.485893007638358	2.8180555705907	1523349839.1192	0.6270112991333	4.4944254983698	0.84983624651718	1.3678549994407	2.1815476074059	0	9.2826361393306	41.5980809527174	2.070049556191	2.46623132961047	46.1343618385185	0.02768	0.02495	0.03960	498	117	0.22380	21.39618	1.49302	0.80808	661.14196
130395	5276852	3	8	NO	6.089	5	2.08664356324459	2.27710934744946	4.2447366651501	1523907127.70307	FALSE	1.05189085006714	1.98370730490849	0.964806220373862	0.917211344040383	0.752109244386359	0.715006927133508	0.438452923343954	1523907127.34913	0.353944301605225	1.238762487079070	0.229269878245529	0.401227463801464	1.133589273741090	0	5.3214266221743	57.79802407400470	12.3565332240054	7.50893431087586	77.663491608886	0.09253	0.06886	0.04497	67	56	0.02398	6.49643	2.51338	0.15534	200.73980
126903	5130389	3	8	NO	7.68	32.7	2.4401170237533	3.4693387676943	12.04962977983	1521754548.4129	FALSE	1.2309980392456	1.9822265722281	1.3112786588822	1.0652158793736	0.65191297067641	0.52958083594993	1.8980891094998	1521754547.1609	1.2519979476929	1.5160480997573	0.64676320966351	0.91880595697709	0.733871775644845	0	12.097584088055	49.3148492539851	14.2411934686270	3.51994310856035	67.0759858311725	0.01161	0.00853	0.02857	28	7	0.01517	3.30372	2.17074	0.08770	102.08497
125540	5073563	3	8	NO	7.57	34.1	1.9859643957581	1.7172767134552	8.6469137073579	1520380911.3039	FALSE	1.0040073394775	1.9780377270864	0.72311814728356	0.720231933423795	0.74187332676392	0.73891225451599	0.092293255315765	1520380911.1209	0.18300127983093	0.504331201404888	0.43855409982731	0.22034805819845	1.20407932885510	0	11.510701674969	60.2089061824124	7.98245248893003	8.4018966399606	76.593255311303	0.02099	0.01650	0.02739	21	122	0.00938	7.13488	2.47875	0.09320	220.46780
125540	5073561	3	8	NO	7.57	34.1	2.8068982657039	4.7394995957727	7.1954578415458	1520380068.4598	FALSE	1.4360103607178	1.9546504276619	1.1467666220815	0.7985782369344	0.52346202191926	0.364525240373338	1.7180786107612	1520380067.1318	1.3280098438263	1.2937243038885	0.5223702805352	0.82569929660175	0.621756909740007	0	12.490561688546	41.1063682147356	6.8612911977043	1.42963812246004	49.3972975349	0.02796	0.02327	0.02526	19	4	0.01134	2.37433	1.59862	0.07222	73.36677
125540	5073572	3	8	NO	7.57	34.1	2.0633359244577	1.7319858352241	8.0836744723361	1520388004.0528	FALSE	1.0580079555511	1.9502083265366	0.88279907524614	0.834397388615385	0.23399933117336	0.221169727453962	1.2175994204464	1520388002.9728	1.0800077915192	1.1273987373125	0.23009440179809	0.74408321214284	0.688960966750222	3.3205208930916	7.2380571870667	55.5394485246408	10.1668267487434	0.714316884782934	66.4205921581671	0.02195	0.01835	0.02503	18	7	0.00961	2.95772	2.14953	0.06959	91.39355
126590	5116770	3	8	NO	5.64	10.4	3.7644536671356	8.5003148884876	5.1820071509471	1521320951.499	FALSE	1.9330244064331	1.9474423885221	0.91164055015574	0.471613574625236	0.51972710448888	0.268867326640693	3.4642024502033	1521320950.57	0.92901182174683	3.72891105270278	0.42501542710302	0.85289405634013	0.91806588072951	0	6.7257557403255	30.3124042250387	1.77772156358838	0.577786252469162	32.6679120410962	0.04799	0.04453	0.04051	231	14	0.14618	8.99448	1.05721	0.51033	277.92934
126902	5130379	3	8	NO	7.7	32.7	2.0994232861188	1.8585508149174	7.6496716903694	1521747452.0409	FALSE	1.0800051689148	1.9439011465365	1.0679562467146	0.9888436439501	0.59699456177331	0.5527700968072	2.2406556573943	1521747449.6659	2.3750114440918	0.9434294150322	0.5417888652095	0.83746400955716	0.352614725979733	0.37080915361513	13.473090936965	54.0568831921682	13.9880733963220	4.37110995919867	72.4160665476889	0.02728	0.02036	0.02692	6	1	0.00539	2.55712	2.34356	0.09397	79.01495
126903	5130393	3	8	NO	7.68	32.7	3.3105120264587	7.1766322590167	8.0896721459082	1521757178.4635	FALSE	1.7159969806671	1.9292062070947	1.032134662653	0.60147813444972	0.58014263308709	0.33807905236614	1.6774757812984	1521757177.5665	0.89699864387512	1.87009845862369	0.29717018185618	0.73807328475392	0.82282541873795	1.1416942570484	8.7621153915518	33.5096016808299	3.25725419804837	1.02907846293952	37.7959343418178	0.02023	0.01793	0.02244	60	12	0.02231	3.54999	1.22317	0.09918	109.69469
121170	4896281	3	8	NO	6.34	34.9	3.2690413273488	7.0547889721645	6.6768178892123	1516648052.0886	FALSE	1.6950113773346	1.9286250057444	1.0235397420319	0.6038542016405	0.54755041883827	0.323036426870061	1.5975286162657	1516648051.2356	0.85300588607788	1.87282250021877	0.54707279986355	0.72560520575386	0.85064501616770	0.29616705273591	9.3767711482263	33.9040400825273	3.3236864846413	0.951171571897138	38.1788981390657	0.02963	0.02631	0.03286	64	13	0.03319	3.71565	1.23556	0.14853	114.81365
119055	4806872	3	8	NO	5.37	10.6	2.2077879482481	2.211107207173	7.1841088792178	1514747172.2325	FALSE	1.1450133323669	1.9281766297728	0.56616727379695	0.49446347723009	0.45956287861008	0.401360286050207	0.68284516793574	1514747171.7465	0.48600578308105	1.40501449099396	0.23285928087205	0.46599398100748	0.95882394249158	0	7.0276488493854	50.1662420972082	3.29903085543127	2.17363558446784	55.6389085371073	0.02519	0.02271	0.04509	63	29	0.03164	4.77733	1.80061	0.17040	147.61965
121170	4896306	3	8	NO	6.34	34.9	3.1230451071203	6.0496469856655	8.6171676226813	1516649089.3788	FALSE	1.6300096511841	1.9159672489372	0.9667376807319	0.5930870900241	0.49990009757458	0.306685360550739	1.0608464018258	1516649088.8718	0.50700306892395	2.09238654921224	0.16286504413459	0.65757107692237	1.29697652189361	1.0991741502176	10.358500640229	34.7948100603882	3.3340741109778	0.891506264552287	39.0203904359183	0.01748	0.01559	0.03229	133	51	0.04754	7.23932	1.26280	0.24271	223.69491
119056	4806893	3	8	NO	5.14	11.5	2.317598987426	2.2158092993409	5.3878831526963	1514766861.796	FALSE	1.2100157737732	1.91534609519925	0.60687221941685	0.501540750600661	0.44698249620222	0.369402206062481	1.5482411639831	1514766860.9	0.89601159095764	1.72792537463535	0.10378462130975	0.57990570186365	0.64720781261753	0.52089412903204	6.2045855238859	46.8416271865284	3.21181042260978	1.74235409883368	51.7957917079719	0.04406	0.03985	0.04841	51	7	0.04063	3.57611	1.67624	0.17977	110.50165
122199	4938016	3	8	NO	5.77	14.4	2.009213431924	1.8011686693331	4.9116264448614	1517437609.9699	FALSE	1.0537390708923	1.90674663911115	1.3080499361406	1.2413414025096	0.67811560954029	0.643532757085742	1.3264448755314	1517437609.4102	0.55973649024963	2.36976666456002	0.67731434137419	0.39556312223877	0.70669525594509	3.1435784838729	6.462637231491	53.3066486511241	22.5932070246956	6.07206926518024	81.9719249409999	0.07307	0.04752	0.05295	155	14	0.05792	8.11539	2.65281	0.24802	250.76569
120454	4866361	3	8	NO	6.2	20.4	2.2021996334124	2.2750748839275	8.9652545650753	1515549977.9637	FALSE	1.1550133228302	1.9066443562887	0.73658367811493	0.63772743011313	0.49018951351118	0.42440160976675	0.55377495705557	1515549977.6397	0.32400369644165	1.70916246677852	0.027718543335575	0.2878851461875	0.888524264843828	0	6.7701898174135	48.6273804171371	5.44016014913761	2.40932582114112	56.4768663874158	0.01656	0.01426	0.03463	139	38	0.03044	7.55407	1.82773	0.18329	233.42082
121170	4896281	3	8	NO	6.34	34.9	3.4989805534738	7.7343324632707	7.5419310191353	1516648056.2886	FALSE	1.8360123634338	1.9057499955664	0.97683579051168	0.532042054817514	0.50955886358087	0.27753563850075	1.4885493723176	1516648055.5116	0.77700519561768	1.91575214775016	0.50775474022852	0.84275099423046	1.08461436163308	1.3844672996594	7.4017504133342	30.5622087149759	2.38201672557355	0.648172200285022	33.5923976408345	0.02213	0.02013	0.03131	73	23	0.03802	4.20583	1.08713	0.17242	129.96028
125540	5073565	3	8	NO	7.57	34.1	2.7770103809516	5.276830170542	9.9138111396792	1520382019.547	FALSE	1.469010591507	1.89039507067323	1.1885405371759	0.809075539718623	0.3263109070525	0.222129717061979	0.8919483455865	1520382018.781	0.76600575447083	1.16441468015168	0.27981753354703	0.51930946255648	0.67794459705492	0.62873766671308	10.889067108135	37.5844941166805	6.88464735793804	0.518939684627729	44.9880811592463	0.01372	0.01146	0.02354	27	9	0.00999	2.64095	1.45592	0.06495	81.60532
119055	4806872	3	8	NO	5.37	10.6	2.9001585329375	5.5726681070916	7.6518366940599	1514747173.9606	FALSE	1.5550181865692	1.8650319063702	0.74344319249153	0.478092924515418	1.2054090921323	0.7751736298286	2.5685229766725	1514747173.3776	0.58300709724426	4.40564615561854	0.47947244647259	0.98628318805986	1.69171729250260	1.6751245967532	7.1890230711777	34.5593482096503	2.27100266581396	5.9702290277251	42.8005799031894	0.02320	0.01873	0.04710	514	76	0.24352	20.48578	1.38513	0.95781	633.01057
119056	4806884	3	8	NO	5.14	11.5	1.3527233317414	1.059379544303	7.4321946586714	1514764232.0217	TRUE	0.73400950431824	1.84292345505503	0.77682850911015	1.05833576341996	0.32210248426589	0.43882604022282	1.1483470383317	1514764230.8877	1.1340148448944	1.0126384531048	0.22803858726718	0.44773178577155	0.394820039426594	4.5598585796034	2.6808840364875	71.4893576945635	23.57619660897870	4.05332644641702	99.1188807499592	0.02688	0.01939	0.05620	14	2	0.01410	3.72859	3.20773	0.16625	115.21337
146087	5934788	3	8	NO	4.91	5.7	2.09447340665804	1.60450358136936	5.59359467595738	1537655705.59879	FALSE	1.15601086616516	1.81181117579461	0.617482698081047	0.53414956221772	0.324608200628509	0.280800302254367	1.14597683604692	1537655704.97279	0.626005887985229	1.83061670511629	0.322871250771364	0.462088526723109	0.738153642947864	0.527530333645174	5.67670457258482	43.87250536907850	3.8132240283793	1.05380852916989	48.7395379266277	0.03675	0.03308	0.04770	83	13	0.05096	4.68915	1.57733	0.21858	144.89460
130362	5275452	3	8	NO	6.418	11.3	1.5357478371006	1.2810675966905	8.975323609355	1523457252.2523	TRUE	0.85301113128662	1.8003842866437	0.36051958022213	0.42264346501358	0.63310119328975	0.74219569952719	0.23923978353284	1523457251.9393	0.31300401687622	0.76433454727020	-0.11122266022985	0.47249082486178	1.50953597841088	0	10.022992614953	58.7089364580556	3.23535619980832	9.97724535961368	71.9215380174776	0.01554	0.01269	0.03040	29	112	0.02191	6.90083	2.32756	0.12319	213.23570
146097	5934994	3	8	NO	7.44	37.6	2.98845162891844	6.02391047672313	8.2286082905369	1538253743.37275	FALSE	1.66301774978638	1.79700525102773	2.07319793281926	1.24664810888854	1.354965678848	0.814763209245391	2.10031288343488	1538253742.53074	0.842008829116821	2.49440719717617	1.33880290190935	0.658545601448185	0.782112465660165	0	10.4063843327212	30.00062424602910	14.43840980791870	6.16729069646318	50.606324750411	0.02537	0.01504	0.03103	114	11	0.03893	5.69576	1.63775	0.16255	175.99896
126340	5106496	3	8	NO	6.62	38.6	2.2631936461644	1.9600232638773	8.02092746327	1520998434.7096	FALSE	1.2740249633789	1.7764123241056	0.89460477326039	0.702187789859131	0.49347328847697	0.387334081090693	1.5816815833541	1520998433.9326	0.77701497077942	2.03558701290855	0.49118598824087	0.82328438559225	1.05954764908380	0.23784446646794	12.175270276914	38.2682058164403	5.97939291919937	1.81937393921745	46.0669726748571	0.01862	0.01547	0.02733	82	22	0.03789	4.87961	1.49084	0.14401	150.78008
119055	4806876	3	8	NO	5.37	10.6	1.3587317610188	1.0083719310299	6.354048909848	1514748045.5878	TRUE	0.76600909233093	1.77378020002901	0.52751679963052	0.68865605501537	0.24544559817281	0.32042125952569	0.26392888176891	1514748045.0908	0.49700593948364	0.53103768144726	0.24386499728574	0.35926279496007	0.72285412792717	0	6.4633492769112	63.4591374253956	9.56531551380551	2.07079546681857	75.0952484060197	0.02908	0.02457	0.04071	9	16	0.00880	3.23963	2.43027	0.08948	100.10465
118613	4791196	3	8	NO	6.84	35	2.6922281263307	4.1071951749294	9.6882446888662	1514424778.4577	FALSE	1.5330219268799	1.7561576120507	0.98410673395155	0.641939111695854	0.45216833502415	0.29495229461227	1.1430288822136	1514424777.8527	0.60500860214233	1.88927707501372	0.45065604542655	0.84917817494999	1.40358033248297	0.18536566985121	11.815679640252	31.0818670243642	4.15305603634585	0.876765950396363	36.1116890111064	0.01204	0.01036	0.02415	91	50	0.03733	5.74662	1.16866	0.16561	177.57053
126590	5116772	3	8	NO	5.64	10.4	2.1922841450054	2.44473911852	9.547719161155	1521321500.669	FALSE	1.2630159854889	1.7357532843551	1.3448828602532	1.0648185578844	0.7187495393349	0.5690739844885	1.8913282837717	1521321499.611	1.0580134391785	1.7876221735333	0.70813511972145	1.0232268308745	0.9671208256759	0.014002664881975	8.9204055615351	36.8549331567595	13.8698211044336	3.9614766517053	54.6862309128984	0.01546	0.01042	0.04431	47	14	0.04095	3.72198	1.76978	0.17126	115.00933
120454	4866364	3	8	NO	6.2	20.4	1.7037595318635	1.2942812139743	7.8739345781323	1515551079.6394	TRUE	0.98301124572754	1.73320451751549	1.3971754878248	1.42132197764506	0.98312192054918	1.00011258754375	1.614287653586	1515551078.7974	0.84200978279114	1.91718396457921	0.979960499503	0.65914103562878	0.78281873809568	1.2200667620819	8.3739411433233	47.2138724247074	31.7508196081873	15.72055174150950	94.6852437744042	0.03064	0.01528	0.04942	67	11	0.03518	5.61077	3.06425	0.16798	173.37290
130360	5275432	3	8	NO	5.93	8.9	2.2165878935098	2.5669628271591	7.7321954040777	1523349837.8231	FALSE	1.2960233688354	1.7102993254679	0.73094376819121	0.56398965155083	0.58947359515359	0.454832535684359	0.6896429770948	1523349837.3811	0.44200801849365	1.56024992362148	-0.075032365735056	0.36998314891886	0.83705076251728	2.2572045898965	5.1389740668172	34.8706385466350	3.79190913620474	2.46614551527007	41.1286931981098	0.01820	0.01543	0.03094	85	24	0.02811	4.87738	1.33103	0.15202	150.71103
146097	5934978	3	8	NO	7.44	37.6	2.06363814904502	1.89418187845963	9.90393159500039	1538255541.38755	FALSE	1.22000312805176	1.69150234257225	1.21448338053778	0.99547562839220	0.758906119195935	0.622052601133771	0.343608077118246	1538255541.07355	0.314000844955444	1.094290294559570	0.242852849623716	0.180760076922517	0.575667485697901	0	9.4689078110829	36.23370521452710	12.54956878866180	4.90028975217964	53.6835637553685	0.01363	0.00920	0.02415	59	16	0.00871	4.17182	1.73733	0.07291	128.90933
146087	5934779	3	8	NO	4.91	5.7	3.24414995287769	6.82213082689132	5.45807910500765	1537654295.30357	FALSE	1.9650182723999	1.65095154505386	1.03712733527777	0.527795262692959	0.47531619643886	0.241888944807801	1.12866148570027	1537654294.82857	0.475004434585571	2.37610726031431	0.371832181841861	0.450828436843	0.94910363781411	0	7.61226045203717	21.4304131951695	2.1902458506175	0.460038237165362	24.0806972829524	0.03242	0.02885	0.04006	184	29	0.08562	7.67049	0.77931	0.48957	237.01820
146097	5934977	3	8	NO	7.44	37.6	2.13816122730489	1.91794099175954	8.83124572362375	1538255231.66572	FALSE	1.30700349807739	1.63592617039674	0.931231404065635	0.712493429004193	0.435146780590389	0.332934671736145	0.132308613424727	1538255231.46072	0.205000400543213	0.645406609324342	0.1416503043775	0.548024912525742	2.673287032969580	0	11.1785252491522	31.63582276665860	6.00085952793392	1.31029711107876	38.9469794056713	0.01332	0.01082	0.01877	31	539	0.04308	19.70676	1.26042	0.33946	608.93882
121170	4896305	3	8	NO	6.34	34.9	3.1746164522641	5.9786266618479	8.6378412818454	1516648693.2154	FALSE	1.9430117607117	1.6338637348758	0.89346192369847	0.459833512984608	0.38502739672045	0.19816009583978	1.1418305177131	1516648692.6644	0.55100345611572	2.07227469272588	0.20594463203091	0.88789894146184	1.61142172813407	0.2460016025904	9.7871936069797	21.2268094372694	1.68133515599956	0.312237788071183	23.2203823813401	0.01234	0.01128	0.02291	120	73	0.05406	7.00461	0.75147	0.27407	216.44238
125540	5073571	3	8	NO	7.57	34.1	2.4919356668783	3.1394150161469	7.1788786792669	1520386428.9723	FALSE	1.5330111980438	1.6255169369005	0.96228937676848	0.627711903211412	0.36910173856967	0.240769107910407										26.6296926759670	3.97103655492701	0.584231116183795	31.1849603470778	0.01893	0.01617	0.01703				1.00922	1.00922	0.01703	31.18496
130362	5275451	3	8	NO	6.418	11.3	1.4549259644819	1.1758512246189	9.7488510639249	1523457107.0055	TRUE	0.90701150894165	1.60408765505036	0.70146386391757	0.77337923168811	0.51776103326806	0.57084284836938	0.0067355551043571	1523457106.7245	0.28100371360779	0.0239696302154862	0.51552099891481	0.73555611501326	2.61760282655876	0.24409884456206	9.2223956584088	43.8300412140858	10.18827588757190	5.55071354031890	59.5690306419766	0.01160	0.00854	0.02677	0	377	0.05245	14.12056	1.92780	0.25682	436.32517
125540	5073561	3	8	NO	7.57	34.1	2.9375438316007	6.1145795370977	9.0946748993356	1520380072.3468	FALSE	1.8360133171082	1.5999578021730	0.94887799986974	0.516814334094408	0.3102109436617	0.1689589834513	1.1088192552916	1520380071.5268	0.82000613212585	1.35220849192555	0.1567153904864	0.56654144145438	0.69089903021290	0.80414082063954	8.9123392779326	21.5411911223142	2.24761415159439	0.2402233575126	24.0290286314212	0.01089	0.00976	0.01571	34	9	0.01269	2.18361	0.77764	0.06382	67.47352
125540	5073571	3	8	NO	7.57	34.1	2.9608775413794	4.8839377996036	9.7306545527795	1520386433.9063	FALSE	1.8680136203766	1.5850406598119	0.87773839384431	0.469877941075908	0.25695678329395	0.137556161524211	1.5982700730833	1520386432.6863	1.2200090885162	1.3100476776178	0.23514558257811	0.6085096243449	0.4987746649371	1.2710864554349	11.036440745717	20.7792208940081	1.82607478404665	0.156497910035666	22.7617935880904	0.00916	0.00837	0.01514	22	3	0.01081	1.54195	0.73663	0.05240	47.64625
126902	5130384	3	8	NO	7.7	32.7	2.2003586904881	1.7839421900146	8.8673154947369	1521749872.6356	FALSE	1.3930065631866	1.5795752501371	0.96196067065984	0.690564349143688	0.21580881707396	0.154923043995056	0.69540635494202	1521749872.1176	0.5180025100708	1.34247680546369	0.2717879794976	0.19847814137607	0.383160578409055	0.306926670569	8.1374369573188	27.6729820722331	5.28912253787812	0.266199579034613	33.2283041891458	0.01201	0.01001	0.01593	54	4	0.01037	2.95667	1.07535	0.06010	91.36106
119055	4806876	3	8	NO	5.37	10.6	1.3886545529378	0.99971795554592	6.9662948462801	1514748046.9049	TRUE	0.88501024246216	1.56908303012908	0.593379308295	0.670477334413868	0.36123786664994	0.40817365643696	1.0634687419355	1514748046.3538	0.55100655555725	1.93004734918259	0.044382831291754	0.43253340552525	0.78498776677496	0.71296537855208	6.1805422416595	42.9805568415891	7.847808354513	2.90850711534100	53.7368723114431	0.02000	0.01600	0.03366	104	17	0.04747	5.67847	1.73906	0.17832	175.46484
126340	5106496	3	8	NO	6.62	38.6	2.5576884750699	3.2770527797418	7.7929006170184	1520998445.0428	FALSE	1.6520321369171	1.5482074579027	0.75826096114439	0.458986810365203	0.62672726357749	0.37936747692272	1.8231263757761	1520998444.2758	0.76701498031616	2.37691104158698	0.43533574482965	1.1731158809477	1.52945628319299	0.34606118059929	8.5159785222823	22.4165256914470	1.97020040351783	1.34595389863064	25.7326799935955	0.01429	0.01244	0.01980	114	47	0.05748	6.04059	0.83277	0.21027	186.65413
130362	5275459	3	8	NO	6.418	11.3	1.4672647027838	1.0567128477095	8.9199107362817	1523460300.8715	TRUE	0.95001220703125	1.54446931515643	0.73610514338425	0.77483756307148	0.25351813991383	0.26685777091861	0.10138133689943	1523460300.5795	0.29200387001038	0.34719175775248	-0.040426865725268	0.3865954153909	1.32393935524607	0.41781033150007	10.006128645932	38.7934019885085	9.76383948612676	1.15813451848983	49.7153759931251	0.01211	0.00945	0.02340	6	93	0.01434	4.81667	1.60891	0.09159	148.83521
119056	4806890	3	8	NO	5.14	11.5	1.5170437377893	1.0548815925216	5.0979967636934	1514766074.1537	TRUE	0.99401307106018	1.52618087423264	0.63847343068725	0.64231894858915	0.17673147860628	0.17779593020621	0.4894942551396	1514766073.6147	0.53900694847107	0.908140899719538	0.31999752617016	0.33418876290041	0.62000826491822	0	4.9020653995381	36.2033202461952	6.41265471813571	0.49133762215676	43.1073125864877	0.03365	0.02826	0.03310	24	11	0.01443	2.51669	1.39506	0.09209	77.76561
125540	5073570	3	8	NO	7.57	34.1	1.918414603958	1.4826124455375	7.1131892489201	1520384549.5935	FALSE	1.275009393692	1.504627819567	0.98450820705764	0.772157610703427	0.45007870606913	0.353000305955278	0.888999977032	1520384549.0755	0.51800394058228	1.71620311620157	0.44588020174403	0.52106068146322	1.00590099928102	0	9.7646500985355	27.432998139621	7.224819676763	1.50995937504042	36.1677771914245	0.01860	0.01411	0.01642	88	30	0.02177	4.99013	1.17048	0.09846	154.19504
125540	5073570	3	8	NO	7.57	34.1	2.7763552679295	5.1305139317909	8.580455875338	1520384560.9096	FALSE	1.8680136203766	1.4862607197531	1.0335268082652	0.5532758417772	0.29914401673753	0.160140168933683	0.85733788433552	1520384560.3366	0.57300424575806	1.49621558772448	0.072788791780036	0.47283125319258	0.82517931881472	0.82473043600485	9.7795565386154	18.2699957061986	2.5318143698297	0.212104073780522	21.0139141498088	0.01088	0.00946	0.01398	60	18	0.01606	3.22767	0.68006	0.08670	99.73504
125540	5073567	3	8	NO	7.57	34.1	2.2746545857276	2.0165973509983	5.5565380737658	1520383146.1533	FALSE	1.566011428833	1.45251467763724	0.8190360030616	0.523007679242769	0.1912911401746	0.122151816169791	1.4268461558639	1520383145.3223	0.83100605010986	1.71701055085612	0.18872147675944	0.76413722366594	0.91953268398578	0	11.764681564291	20.8149137554529	2.69866941903423	0.147208678331663	23.6607918528188	0.02449	0.02155	0.01320	55	16	0.02087	3.04830	0.76572	0.08041	94.19233
126590	5116770	3	8	NO	5.64	10.4	2.5258247352324	2.8597289087734	4.8381177814122	1521320954.1011	FALSE	1.7490222454071	1.4441352829360	1.0374149166646	0.5931399211124	0.62222818071285	0.35575772826607	3.03700272424	1521320953.4321	0.66900849342346	4.53955779948175	0.76533498544383	0.78265859639234	1.16987841572430	0	4.5716711964342	18.4225145436903	3.1077599151410	1.11800008604799	22.6482745448793	0.03454	0.02809	0.02541	476	32	0.21783	17.15741	0.73295	0.82247	530.16395
119055	4806877	3	8	NO	5.37	10.6	2.7048287228368	4.5996712373208	5.4174005422355	1514748103.6705	FALSE	1.9110226631165	1.4153828602042	0.45796297244603	0.239642878802485	1.0608408121667	0.5551168139663										16.1961022756017	0.46429253652937	2.4913308742108	19.1517256863419	0.02545	0.02152	0.02590				0.61980	0.61980	0.02590	19.15173
130361	5275447	3	8	NO	5.79	5	1.36789684361	1.0303687064437	5.067242916947	1523370497.5575	TRUE	0.9830014705658	1.39155116708285	0.18344427393992	0.186616479662368	0.52211798943993	0.531146702292731	0.8457236317201	1523370496.6505	0.90700149536133	0.932439070988722	0.51999815782146	0.44496786183549	0.49059220311233	0	6.6419090169267	30.4349558446732	0.547361568676633	4.43407765865116	35.416395072001	0.02767	0.02378	0.02119	15	4	0.01044	1.75814	1.14616	0.06251	54.32640
126591	5116776	3	8	NO	5.47	9.7	1.8919915410054	1.2163293942611	3.0996333486632	1521393919.2884	FALSE	1.3930325508118	1.3581818600741	1.1599532396518	0.8326820783734	0.61865780126228	0.444108646924117	1.5620468014437	1521393918.8024	0.48601126670837	3.21401355985643	-0.3613437494341	1.1802155557699	2.42837077371312	0.051492110734971	5.1595597432312	20.4589372611384	7.6899878599832	2.1874879900965	30.3364131112181	0.08977	0.06054	0.02882	328	187	0.17100	17.67568	0.98176	0.70000	546.17858
126902	5130380	3	8	NO	7.7	32.7	2.0010119700194	1.0916541517585	3.7656755125757	1521747640.7058	FALSE	1.4790070056915	1.3529428612029	3.1041558891389	2.0988108083285	0.29165156251627	0.197194172437277	0.90861416111499	1521747639.9178	0.78800392150879	1.15305791800537	0.042020402096242	2.8304416227836	3.59191311810245	0	6.652521963555	19.1212889120375	46.0155732458139	0.406206066689248	65.5430682245406	0.13951	0.04070	0.03337	26	253	0.07568	11.15115	2.12113	0.26888	344.57069
126340	5106499	3	8	NO	6.62	38.6	1.8237630698244	1.5699539888216	9.6904422911759	1520999621.2937	TRUE	1.4580283164978	1.2508420098487	0.77788926158389	0.533521367714167	0.64928093855875	0.445314354469006	0.39164605283501	1520999620.8187	0.47500920295715	0.82450203153293	0.16491845037684	0.21616956306927	0.45508499987688	0	13.571799445015	16.5793478155620	3.01624184507667	2.10133800092085	21.6969276615595	0.00688	0.00525	0.01473	22	7	0.00638	1.63573	0.70217	0.04550	50.54415
126340	5106498	3	8	NO	6.62	38.6	2.1467739187084	2.0510488978618	7.6566175810292	1520998836.4504	FALSE	1.7820348739624	1.2046755930960	0.57755394968289	0.324098006229633	0.63263593656624	0.355007607207797	2.1356955009217	1520998835.1444	1.3060252666473	1.6352635400418	0.63067444620604	0.89658727898294	0.686500714710192	2.0446199318932	6.0173794245945	12.5820819079892	0.910678332551813	1.09266643802006	14.5854266785611	0.00905	0.00781	0.01210	32	6	0.02263	1.67620	0.47202	0.07448	51.79448
125540	5073572	3	8	NO	7.57	34.1	2.1411775075754	1.7111449382114	8.4765634125932	1520388018.9959	FALSE	1.792013168335	1.19484473965379	0.7258521911479	0.405048469494399	0.26802236588652	0.149564953328745	0.84869466507224	1520388018.5859	0.41000294685364	2.06997211016437	0.072363769292231	0.45910044432872	1.11974913315100	0.58940160184547	9.7048797264109	12.3086447947334	1.41449454868646	0.192862133459355	13.9160014768792	0.00708	0.00626	0.00888	161	47	0.03047	7.20473	0.45036	0.17459	222.62601
120454	4866359	3	8	NO	6.2	20.4	1.4389835423602	1.0842219861509	9.1806558405339	1515547623.6404	TRUE	1.2090139389038	1.1902125327562	0.61120093599172	0.505536715768463	0.33302515895558	0.275451877136777	0.87319937578029	1515547622.9924	0.6480073928833	1.34751452741149	0.17818145451702	0.39367438869793	0.607515273778407	0.56639043615296	8.3839349352722	18.1028191947072	3.26589773263906	0.969591162707068	22.3383080900533	0.00654	0.00530	0.01434	43	9	0.01792	2.40876	0.72292	0.07338	74.43068
126902	5130387	3	8	NO	7.7	32.7	1.5489356221013	1.1170433734221	11.182846020493	1521750891.3065	TRUE	1.3070063591003	1.1851018254934	0.68883714426035	0.527034271458727	0.52677283745615	0.403037700458292	1.1685087794113	1521750889.8385	1.4680068492889	0.7959831931147	-0.14556247690496	1.0402608166429	0.7086212282639	1.3838866868919	9.1685856511704	16.6020652862850	3.28343555865787	1.92018082160214	21.805681666545	0.00465	0.00354	0.00981	7	5	0.00604	1.09251	0.70569	0.03225	33.75868
146087	5934775	3	8	NO	4.91	5.7	1.3366959656764	0.92071222232293	5.9275844170016	1537653371.0379	TRUE	1.13401055335999	1.17873326814805	0.447815222403234	0.394895110170175	0.18945391809809	0.16706539241346	0.816357900151402	1537653370.4549	0.583005428314209	1.400257802936660	0.189108123228782	0.337970588020705	0.579704015789295	0	6.65341354741417	18.9296450115291	2.12458885856262	0.38026326938518	21.4344971394769	0.01412	0.01247	0.02058	52	9	0.03004	2.66345	0.69367	0.11962	82.30053
126902	5130388	3	8	NO	7.7	32.7	2.7468924693957	4.8854770968805	10.378208759811	1521751447.4212	TRUE	2.3430111408234	1.1723770414640	1.8434171030177	0.7867726580121	0.80399972676896	0.343148059674361	1.9682360142342	1521751446.4712	0.95000457763672	2.07181740021768	0.79672031118393	0.86371220713339	0.90916636347375	0	11.941597596817	9.0633497671392	4.0818087081308	0.776456670249152	13.9216151455191	0.00618	0.00402	0.01123	70	13	0.02722	3.14474	0.45054	0.11014	97.17250
119736	4837563	3	8	NO	7.0	21.7	1.5484700684806	1.1022397484223	11.047051472406	1515447403.8406	TRUE	1.4140312671661	1.0950748434184	0.72594880277563	0.513389498260901	0.59919490024969	0.423749399439062	0.20997891372073	1515447403.4735	0.36700820922852	0.57213683084126	0.19387153632618	0.25270455847574	0.68855287735101	0	12.007921696379	13.1025877087976	2.8798073267827	1.9619487675974	17.9443438031777	0.00424	0.00310	0.01057	14	20	0.00516	1.67259	0.58072	0.03834	51.68292
121170	4896272	3	8	NO	6.34	34.9	1.8357795728999	1.3008267119877	7.2949455053665	1516649790.608	FALSE	1.7699766159058	1.0371773030235	1.3118244447772	0.7411535457523	0.80099552470262	0.45254582320722	0.68112658409739	1516649790.2632	0.3448007106781	1.97542105629033	0.79788025215643	0.51031097195107	1.48001716976589	0	8.6123349979586	9.3900296536744	4.7948755140168	1.78766475107428	15.9725699187655	0.01084	0.00637	0.01435	175	98	0.04779	9.35207	0.51691	0.31028	288.97903
119736	4837567	3	8	NO	7.0	21.7	1.5776223598812	1.1228692893576	9.189399723549	1515448943.8827	TRUE	1.5760350227356	1.0010071712384	0.99027294053952	0.628331811320192	0.25029286398641	0.158811739825404	0.82191632592752	1515448942.7697	1.1130247116089	0.738452899881642	0.19747090683905	0.26105967384344	0.234549755383304	2.9599240676205	6.1110016072628	9.8228383508767	3.87026511344197	0.247245175958767	13.9403486402774	0.00531	0.00374	0.00915	8	1	0.00386	0.72083	0.45114	0.02495	22.27353
126902	5130383	3	8	NO	7.7	32.7	1.5097465560004	1.0286836372289	9.2889014087301	1521748672.1948	TRUE	1.7500085830688	0.8627080864672	0.68440328111859	0.391085671087639	0.40350439462635	0.23057280891661	0.45537261889688	1521748671.1908	1.0040047168732	0.453556254511492	0.34681866575751	0.24844908506136	0.247458085490984	0.76826426240093	7.360002639579	6.5707666277718	1.35030573893858	0.469358282135011	8.39043064884539	0.00347	0.00272	0.00505	3	1	0.00142	0.40448	0.27153	0.01185	12.49834
119056	4806889	3	8	NO	5.14	11.5	2.1152649009476	1.7202512610297	6.2022006714164	1514765972.5664	TRUE	2.8940377235413	0.7309043982880	0.76185050628314	0.263248298419172	1.0120999163917	0.3497189784911	0.088828779041158	1514765971.6374	0.92901206016541	0.0956163895497138	-0.036570487273432	0.16740561795093	0.18019746473595	1.4794651824472	0.95940660057544	2.8519732421445	0.369960571204292	0.6529240987929	3.87485791214176	0.00595	0.00438	0.00866	0	1	0.00050	0.14780	0.12540	0.01349	4.56692
119056	4806886	3	8	NO	5.14	11.5	1.329151920496	0.93036282388692	4.4920406591073	1514764480.097	TRUE	2.3970313072205	0.554499190933485	0.63815597930231	0.26622763640175	0.27479963522263	0.114641654614548	0	0	0		0	0		0	0	1.98178533822838	0.456836768020165	0.084710972700901	2.52333307894945	0.00612	0.00480	0.00467				0.08166	0.08166	0.00467	2.52333
119735	4837558	3	8	NO	6.97	21.2										0.50735204239846		0	0	0		0	0		0	0				0										0.00000
122756	4958955	3	8	NO	5.55	20.4	3.1304363770214	8.6467531591811	6.6817486350076	1517883957.5833	FALSE	0.5940113067627	5.2699945967055	1.4492473796232	2.4397639626112	0.67609065083078	1.13817808370585	1.7248039927618	1517883956.7843	0.79901552200317	2.1586614343081	0.66731983043444	0.76267914536231	0.95452356601313	1.3373248598063	7.9838524789947	722.3607029473280	154.8208317565680	33.694127086748	910.875661790644	0.24733	0.19614	0.35849	90	18	0.05703	32.96430	29.47818	0.94011	1018.59689
123427	4988057	3	8	NO	5.56	16.1	3.9664097686046	9.1663199880412	10.626473102829	1517964054.8801	FALSE	0.75601553916931	5.24646592973841	1.4510093867459	1.91928513577939	0.55198061780825	0.73011808515834	1.7331182304042	1517964053.9411	0.93901920318604	1.84566857048698	0.53865032433475	0.92860314979952	0.98890751823692	0.99896149406802	9.6905765137653	562.511590547754	75.2795061507337	10.89391478831590	648.685011486804	0.08863	0.07686	0.32376	56	16	0.04472	23.32762	20.99304	0.80661	720.82353
122756	4958964	3	8	NO	5.55	20.4	3.0049464847482	8.3994439775819	7.7212323560726	1517886297.5892	FALSE	0.61501169204712	4.88599895515153	1.342971290385	2.18365164069451	0.48378822373402	0.78663256323419	0.32091418792166	1517886297.2972	0.29200553894043	1.09900034460349	0.4505790474128	0.77275750875811	2.64637962540757	0	6.8394689350031	599.724582834845	119.787589066732	15.54493649799830	735.057108399575	0.15475	0.12626	0.29952	64	371	0.08405	37.84814	23.78826	0.70281	1169.50746
122756	4958957	3	8	NO	5.55	20.4	3.1127489817543	8.3464313302974	7.0219312776985	1517884292.0537	FALSE	0.65901279449463	4.72335136397669	1.0654081312097	1.61667290849295	0.717703267367	1.08905816907148	1.9697266186187	1517884291.2867	0.76701474189758	2.56804271290228	0.71289387245905	0.80307856817375	1.04701842651283	0	8.4399156049108	523.040290175924	61.2743846781713	27.8058894310264	612.120564285122	0.16696	0.14267	0.26727	133	22	0.07873	24.82338	19.80973	0.72471	767.04243
123394	4986653	3	8	NO	6.86	28.7	3.698103204525	8.8547166534331	7.1486983430609	1518461989.6704	FALSE	0.82100892066956	4.50433985724427	1.3918155275822	1.69525018856936	0.70836669442558	0.86280024076704	3.0921437325019	1518461987.9104	1.7600190639496	1.7568808178492	0.70708150284992	0.55113405382387	0.313140956886619	1.3514222035069	7.2401322004537	381.806141503371	54.0814354761042	14.00880606461070	449.896383044086	0.14751	0.12518	0.16018	27	1	0.02134	15.46448	14.55975	0.53486	477.85257
122756	4958962	3	8	NO	5.55	20.4	4.0255527202867	9.0804634768078	6.7300314969049	1517885074.7607	FALSE	0.91701769828796	4.38983100086538	1.1890580282999	1.29665766595326	0.66329514259816	0.72331771113743	2.027563193785	1517885074.0157	0.74501419067383	2.72150949494152	0.66095487246261	0.83928226542564	1.12653191836057	0.53579958016382	8.8325330546635	324.673145453469	28.3270552845723	8.81472900013574	361.814929738177	0.14950	0.13415	0.21983	154	26	0.08881	17.53172	11.70922	0.59654	541.73014
122623	4953956	3	8	NO	6.79	32.5	3.1597202221761	8.213669139396	6.5822191340332	1517793963.7411	FALSE	0.72300410270691	4.37026596439243	1.0379072211516	1.43554817637369	0.62829627878183	0.86900790248562	1.3857774061609	1517793963.1581	0.583003282547	2.3769632996006	0.62313592086052	0.87647892890548	1.50338592447774	0	8.6474494488945	408.13464122528	44.0375618010356	16.13745980917170	468.309662835487	0.15949	0.13900	0.14988	150	60	0.05410	21.93960	15.15565	0.39192	677.93355
123394	4986657	3	8	NO	6.86	28.7	3.4806195615271	8.6573997032526	5.1509547716276	1518463225.9848	FALSE	0.81000900268555	4.29701342823013	1.4966243114376	1.84766379938446	0.61747183738551	0.76230243779799	1.8252233445841	1518463224.0418	1.9430210590363	0.9393739383810	0.61418458583009	0.67498488513865	0.347389382116851	0	12.433660112037	352.185977033728	65.1155237046334	11.08391675071220	428.385417489074	0.26690	0.21943	0.15048	7	1	0.00672	14.12174	13.86361	0.52097	436.36162
122623	4953966	3	8	NO	6.79	32.5	2.0477502617798	3.9323373806362	5.8026602991274	1517798730.3379	FALSE	0.48600268363953	4.21345463865509	1.9719373440707	4.05746184219282	1.3118842045103	2.69933530960362	2.5812452543801	1517798728.6429	1.6950097084045	1.5228498347716	1.2962539061252	0.65719334020471	0.38772246373935	1.9213107515344	5.3730402865919	564.373303090447	523.357804484469	231.63462979917	1319.36573737409	0.38865	0.16625	0.28384	21	1	0.01689	43.42635	42.69792	1.29549	1341.87430
122756	4958965	3	8	NO	5.55	20.4	2.2417543342076	4.6560392971587	5.4955041288522	1517886561.2063	FALSE	0.53901052474976	4.15901773949285	1.2471633423138	2.31380146592278	1.2072015142572	2.23966223074708	2.3931428936295	1517886559.9963	1.2100231647491	1.9777661811340	1.1965839179395	0.81309768235014	0.671968691209922	3.6714306052567	4.8917987766068	495.807148359768	153.455840485981	143.779275482663	793.042264328412	0.28886	0.18059	0.28321	50	6	0.04466	27.46770	25.66480	0.98355	848.75187
122623	4953959	3	8	NO	6.79	32.5	2.6938976113701	7.1782836230501	6.8813020227108	1517796015.4066	FALSE	0.66900396347046	4.02672892608214	1.4384532373994	2.15014157754376	0.88942124206806	1.32947081128516	1.685436907072	1517796014.5536	0.85300469398499	1.97588233565061	0.88487023700276	0.74901131976803	0.87808581248113	0	9.5761464749352	374.459266268797	106.766229968616	40.81853434224200	522.044030579655	0.15052	0.10797	0.15460	71	14	0.03197	19.63503	16.89463	0.40876	606.72235
122623	4953953	3	8	NO	6.79	32.5	2.5658206827004	6.4756663106468	11.412303763314	1517792534.091	FALSE	0.64800381660461	3.95957649778161	1.7374090250748	2.68117097547113	0.82160140531743	1.26789593558635	1.8180094879062	1517792533.281	0.81000447273254	2.24444376433277	0.73541277320776	0.7651015504376	0.944564599571333	1.0078869633499	9.6983875143367	373.807831279133	171.395706567681	38.32817486916880	583.531712715983	0.05925	0.03796	0.16738	96	17	0.04055	22.54483	18.88452	0.44960	696.63520
123394	4986661	3	8	NO	6.86	28.7	2.8257842515881	6.9114075150061	5.9825303326419	1518464332.2779	FALSE	0.75600838661194	3.73776839203052	1.2675043191269	1.67657441580408	0.65766856658586	0.86992231598542	2.9771968099767	1518464330.7659	1.5120162963867	1.9690242870341	0.65463392479897	0.79141145150827	0.523414630781113	0.83142333014047	8.1238231266028	285.513497942637	57.4443791130874	15.46545900935270	358.423336065077	0.15451	0.12308	0.11751	40	3	0.02781	12.97214	11.59946	0.39425	400.83905
122756	4958965	3	8	NO	5.55	20.4	3.0163572537828	7.473525849242	6.1861421712522	1517886558.2582	FALSE	0.82001566886902	3.67841416730855	1.4354168901373	1.75047495387137	0.67141933200105	0.81878841769827	1.7768698378285	1517886557.3512	0.90701746940613	1.95902493365636	0.66548136426041	0.50734567361822	0.55935601102634	0.72588733271411	8.1834345259401	254.933897709521	57.7322036798608	12.63134840029190	325.297449789674	0.14225	0.11148	0.17673	65	5	0.04249	12.81551	10.52743	0.45312	395.99913
122623	4953952	3	8	NO	6.79	32.5	3.5471849138343	8.651644364552	9.1765094947779	1517792426.0724	FALSE	0.9710054397583	3.6531050894187	1.5258145896462	1.5713759441204	0.82161069073423	0.846144271795988	2.1747362934797	1517792424.6034	1.4690082073212	1.4804112615854	0.81750083388677	0.74210886169131	0.505176797510599	0	12.234530289269	212.3396770298500	39.2886423343729	11.3918867344994	263.020206098722	0.06190	0.04997	0.11305	23	3	0.01673	9.34479	8.51198	0.31188	288.75416
123394	4986653	3	8	NO	6.86	28.7	3.0292500433224	7.5349549745681	7.7991399228745	1518461987.0684	FALSE	0.8420090675354	3.5976453937594	1.412584563694	1.67763580958659	0.68328706466305	0.811496088353375	1.5813844595007	1518461986.2583	0.81000900268555	1.95230479446239	0.68021286909936	0.48164165485249	0.59461271819897	0.73964824508375	7.9154566129938	237.4916933431070	51.6424800871921	12.083272697536	301.217446127835	0.08510	0.06709	0.10999	73	7	0.02791	12.31913	9.74814	0.27272	380.66119
122756	4958956	3	8	NO	5.55	20.4	1.8580815542569	2.3871590276319	2.6138366209226	1517884035.6828	FALSE	0.5190098285675	3.5800508044045	1.3080790583543	2.5203358132247	1.1616577686026	2.2382192102389	2.1786614834185	1517884034.6038	1.0790207386017	2.0191099257664	1.1563810211782	0.65179481638298	0.604061435582451	1.8617171322316	6.0316393422315	381.5322740057790	189.0905055061480	149.1276380348180	719.7504175467450	1.11585	0.59150	0.24750	58	5	0.04547	25.35110	23.29289	0.82939	783.34900
122623	4953962	3	8	NO	6.79	32.5	3.3462026349601	8.1801324802692	6.1963529455454	1517796913.5017	FALSE	0.98300552368164	3.40405272844002	1.0517231251398	1.06990561070379	0.21809546959235	0.22186596548870	1.5599805600102	1517796912.7567	0.74500417709351	2.09392189731897	0.20128816017628	0.91195436624507	1.22409295717359	0	8.8227493901197	182.123120467917	17.991337706945	0.77366668782707	200.888124862689	0.10496	0.09516	0.08741	91	31	0.04023	10.44948	6.50123	0.24698	322.88878
123394	4986663	3	8	NO	6.86	28.7	2.5332532626139	5.0017001392961	6.3704440261629	1518464833.3923	FALSE	0.74500823020935	3.40030238578981	1.1940283674295	1.60270493534544	0.8367089302076	1.12308682814481	1.964599170926	1518464832.3663	1.0260109901428	1.91479349617158	0.83263710444918	0.80222268191243	0.781885076884778	0.20021459872225	8.8300273428393	239.774223720434	53.2690021893569	26.1573703130879	319.200596222879	0.11959	0.08983	0.10313	55	9	0.02866	12.41478	10.33012	0.29463	383.61674
123394	4986655	3	8	NO	6.86	28.7	1.7086505883047	1.996765612107	5.2544138996873	1518462506.157	TRUE	0.50700545310974	3.37008325615556	1.2853924018668	2.53526346508265	0.57261184158482	1.12939976892296	0.92940594333243	1518462505.487	0.67000722885132	1.38715808324312	0.57071799477577	0.49617817206088	0.74055644580364	0	8.3804698975221	346.096425085904	195.86735079173	38.86970480671010	580.833480684344	0.21768	0.12971	0.12771	44	13	0.01657	20.64243	18.79720	0.32558	637.85101
122623	4953959	3	8	NO	6.79	32.5	2.0645672526766	2.4550792649499	8.2915484762277	1517796022.0466	FALSE	0.63800358772278	3.23598063146579	0.5228233749821	0.819467766393303	0.93141912902199	1.45989638137694	0.52510287042433	1517796021.6476	0.39900231361389	1.31603966319971	0.92907678513104	0.53937436379804	1.35180760961699	0	6.8533090854859	253.581280125769	16.2618186497463	51.61185007259060	321.454948848106	0.06088	0.04803	0.09078	67	71	0.02434	14.86338	10.40307	0.21082	459.27838
123394	4986653	3	8	NO	6.86	28.7	2.8665930823587	6.6244460763578	7.8535173942997	1518461978.4633	FALSE	0.9070098400116	3.1604873022348	1.6505753021089	1.8197986717408	0.51941303309712	0.572665267987034	1.5378713946741	1518461977.5893	0.87400960922241	1.75955890924622	0.54465002946009	0.45632449568496	0.52210466666487	0.018930498145734	8.7333685017351	170.1471130745990	56.4109186808137	5.58622177289336	232.144253528306	0.06967	0.05106	0.09131	55	5	0.02257	9.43988	7.51276	0.22529	291.69223
123427	4988056	3	8	NO	5.56	16.1	3.4078147581821	8.1463365718682	7.1867480651461	1517963706.216	FALSE	1.0910224914551	3.1235055050397	0.9751534383207	0.8937977410714	0.2295689395683	0.2104163217223	1.4036267408796	1517963705.449	0.7670156955719	1.8299843783940	0.29933767913674	0.60962388382884	0.79479975096767	0.76908142971568	7.084283106441	138.1590478370130	11.3128827377148	0.6269799155067	150.0989104902350	0.06471	0.05956	0.10811	67	13	0.04060	7.45240	4.85757	0.28246	230.27913
122623	4953962	3	8	NO	6.79	32.5	3.6662486406819	8.4796180323875	6.8781983304947	1517796909.7656	FALSE	1.1880066394806	3.0860506320779	1.1157551836572	0.9391826161384	0.55458560864407	0.466820293939213	1.5162522041387	1517796909.0426	0.72300410270691	2.09715574014295	0.12944013549193	0.85416909283779	1.18141666090110	0.1948739480102	8.3829091192648	123.8556178837920	11.4712225823188	2.83406020192739	138.160900668038	0.07080	0.06347	0.07266	94	30	0.03962	8.47799	4.47123	0.22160	261.96978
123394	4986670	3	8	NO	6.86	28.7	2.3478827372434	3.4911779918363	10.810308754642	1518467255.9237	FALSE	0.7660083770752	3.0650875467030	1.4450988564679	1.8865314005907	0.87182696592205	1.13814286111451	2.3682126836146	1518467254.7677	1.1560125350952	2.0486046748789	0.86603984405962	0.77380292835801	0.669372437466074	0	12.094681127013	189.4875723677510	71.7832374335252	26.1269384396846	287.397748240961	0.03845	0.02535	0.09547	56	6	0.03112	11.30989	9.30090	0.29129	349.47561
122756	4958956	3	8	NO	5.55	20.4	2.6759347505931	5.439622926695	6.8650753002933	1517884030.1327	FALSE	0.87501668930054	3.05815281389908	1.0121850518179	1.156760852901	0.41250931995309	0.47143023098547	0.74553152800794	1517884029.7767	0.35600686073303	2.09414932755191	0.40671530125835	0.29843909629474	0.83829591283787	0	7.8909917245427	165.131723370679	23.6264957762708	3.92416269369568	192.682381840645	0.07301	0.06257	0.11171	190	30	0.05208	13.38189	6.23568	0.33726	413.50035
122623	4953966	3	8	NO	6.79	32.5	2.004183618819	2.3146824044418	5.6288570232954	1517798727.9849	FALSE	0.65800356864929	3.04585524199066	1.2919255779017	1.96340208390311	0.57909529724574	0.88007926527583	1.463692224667	1517798727.2609	0.72400403022766	2.0216630896471	0.57658099714478	0.57233903391097	0.79051912698746	0	8.0551431565632	217.830532426258	90.5146194765614	18.18627747417360	326.531429376993	0.13839	0.09232	0.09511	87	13	0.03223	13.82151	10.56736	0.26127	427.08481
122756	4958959	3	8	NO	5.55	20.4	2.7552484368717	6.2892623070542	6.3467065081631	1517884476.1872	FALSE	0.90701746940613	3.03770162075897	1.0950814060952	1.20734323541994	0.27524288622869	0.30345929986211	1.3305743294478	1517884475.5612	0.62601184844971	2.12547786873828	0.24942899282071	0.66168167980563	1.05697948280732	0.54944556759097	7.7331970725812	157.182089509603	24.8298638571002	1.56860550549966	183.580558872203	0.08436	0.07223	0.11032	111	28	0.05768	10.44172	5.94112	0.32772	322.64920
123427	4988054	3	8	NO	5.56	16.1	2.5493193178245	3.72608612206	8.4915783904905	1517962667.5697	FALSE	0.86401772499084	2.95054053185255	0.63059851037874	0.72984441422822	0.76520054168052	0.88563060634969	2.4530563296345	1517962666.5867	0.98302006721497	2.49542853848787	0.76276760062707	0.92996258421272	0.94602604283291	0.0005468534074673	9.9021076920632	155.671461134138	9.52503124380965	14.02526466755630	179.221757045504	0.04383	0.03807	0.10223	98	14	0.07264	9.42263	5.80006	0.35503	291.15934
122623	4953966	3	8	NO	6.79	32.5	3.359857456637	7.9927379219328	6.8575151226466	1517798724.8749	FALSE	1.1980066299438	2.80453995216589	1.6967264637534	1.4162913804851	0.62341886916762	0.520380149479528	1.6262062776479	1517798723.9998	0.87500500679016	1.85851082568478	0.61822808964315	0.6032977330464	0.689479178250097	0	9.9001280860175	101.436095649657	25.8686929733399	3.49229325614738	130.797081879144	0.06800	0.05274	0.06936	61	8	0.02687	6.47830	4.23292	0.18369	200.17944
123394	4986653	3	8	NO	6.86	28.7	3.2959067478518	7.9283362022873	6.7064716044975	1518461983.7973	FALSE	1.1870129108429	2.7766393421209	1.3400774290813	1.1289493288912	0.46404441840416	0.39093460076575	1.5088041084186	1518461982.9333	0.86400938034058	1.74628209224285	0.5718660625869	0.51607603712892	0.59730374330599	0	9.013103912442	100.3487545682320	16.5890662118560	1.98921287839707	118.927033658485	0.06405	0.05405	0.06122	55	6	0.02282	5.81997	3.84877	0.15996	179.83716
123394	4986662	3	8	NO	6.86	28.7	3.0018392077597	6.0460013744983	6.123227963616	1518464545.0772	FALSE	1.1020119190216	2.7239625597016	1.1753083094851	1.0665114316809	0.5265647519817	0.4778212856801	1.6151240409027	1518464544.3752	0.70200777053833	2.30072103000249	0.52431519552289	0.6648219751099	0.947029367780482	0.21542515317181	9.4275954248157	104.0266133542480	15.9467880433175	3.2009078906684	123.1743092882340	0.07388	0.06240	0.05887	116	20	0.04148	8.39514	3.98622	0.20295	259.40971
122623	4953961	3	8	NO	6.79	32.5	3.5735945326917	8.2339161367854	8.0400104807198	1517796490.0003	FALSE	1.3170075416565	2.7134199460976	1.0048058797012	0.7629461851353	0.33813704176403	0.256746473401913	1.8513269654837	1517796489.1253	0.87500476837158	2.11579071612272	0.33679834627454	0.92884073440199	1.06152648302775	0	11.47562476262	86.3722529841205	6.8285427633246	0.773302111091756	93.9740978585369	0.03907	0.03591	0.05478	79	20	0.03832	6.24316	3.04123	0.18718	192.91375
122623	4953954	3	8	NO	6.79	32.5	2.8914069677635	6.4958421908952	7.7219602782515	1517793291.5613	FALSE	1.0690059661865	2.7047622363401	1.4807789379496	1.3851923981604	0.7162034944867	0.6699714661478	1.7613874491158	1517793290.8383	0.72300410270691	2.43620671379486	0.71108041569932	0.73697086647625	1.01931768259274	0	10.357274416183	105.7320233393920	27.7311930218086	6.4872549785441	139.9504713397450	0.05120	0.03868	0.06622	127	22	0.04770	9.35215	4.52914	0.22923	288.98147
122756	4958961	3	8	NO	5.55	20.4	2.4697413011719	4.2767974724688	5.618350438666	1517884904.7605	FALSE	0.9290177822113	2.6584435179414	0.55260193998293	0.594823856511762	0.49344234926961	0.531144138161802	1.1630906688025	1517884904.3725	0.38800740242004	2.99759917349048	0.87319200506842	1.1345773456545	2.92411262923859	0	5.9724649735349	117.5328675448010	5.88411583494701	4.69168928624441	128.108672665992	0.07695	0.07059	0.07885	358	340	0.17951	26.74346	4.14591	0.72109	826.37305
123394	4986661	3	8	NO	6.86	28.7	2.6711660313547	4.289614817685	7.6368940242085	1518464329.6969	FALSE	1.0690116882324	2.4987248135439	1.468746814448	1.37392961238484	0.46547937647489	0.435429641788628	1.8339156196529	1518464328.3258	1.3710148334503	1.3376336819330	0.46426955209766	0.59302891783187	0.432547411860929	0.98550513006742	10.590159883599	90.2366344834053	27.2819242097787	2.74019841344564	120.25875710663	0.04499	0.03375	0.05575	20	2	0.01324	4.61263	3.89187	0.15082	142.53042
122623	4953954	3	8	NO	6.79	32.5	2.9920434579705	7.0742248874775	5.4870655914306	1517793287.5453	FALSE	1.1980068683624	2.4975177830662	1.2866305753634	1.0739759590211	0.6521535414013	0.5443654444926	0.65122996528177	1517793287.1883	0.3570020198822	1.82416325122378	0.64658429565954	0.45047412111384	1.26182513270508	0	9.3494704627479	80.4426472673214	14.8750452448902	3.8216443995383	99.1393369117499	0.08051	0.06532	0.05257	144	69	0.03365	10.09879	3.20839	0.21480	312.05273
123394	4986670	3	8	NO	6.86	28.7	3.0974793016005	6.8007046269298	8.1443457961168	1518467265.0688	FALSE	1.2410135269165	2.4959271066905	1.5309947980263	1.2336648753784	0.53419456177854	0.43045023296872	1.7045207882576	1518467263.6758	1.3930151462555	1.2236197092612	0.53258558929255	0.57553200732722	0.413155599114827	0.55641006005484	11.550747471794	77.5560646165497	18.9472579647802	2.30673583746784	98.8100584187977	0.03773	0.02961	0.05318	17	2	0.01118	3.79642	3.19774	0.13400	117.30929
122623	4953962	3	8	NO	6.79	32.5	2.6640391227185	4.1871736574331	7.3447882270095	1517796906.6556	FALSE	1.0690059661865	2.4920713326063	0.77841425537081	0.72816642749682	0.471896662345	0.441435012779594	0.76699818453501	1517796906.1806	0.47500252723694	1.61472442893428	-0.051531861214036	0.40752276737882	0.85793810350727	0	6.5931873523871	89.7571994208057	7.66319113913449	2.81631940753737	100.236709967478	0.04054	0.03630	0.04743	85	24	0.02287	6.76325	3.24391	0.14283	208.98438
123427	4988054	3	8	NO	5.56	16.1	3.035171902036	6.2176287865146	5.8117240093804	1517962670.0748	FALSE	1.2310252189636	2.46556435666794	0.92700964268241	0.753038709851013	0.47809396908422	0.388370572527123	1.3252376578278	1517962669.2648	0.81001663208008	1.63606227988759	0.47710200413389	0.77745308120533	0.95979891080615	0.018159496025453	8.2509878825688	76.2946736791752	7.11698641700253	1.89301547514995	85.3046755713277	0.06345	0.05675	0.06933	51	18	0.03670	4.98156	2.76067	0.20741	153.93014
122756	4958954	3	8	NO	5.55	20.4	2.137449033083	2.086291835261	4.4153105133902	1517883822.6217	FALSE	0.87501668930054	2.44275230314933	0.6667218151443	0.761953255631336	0.46396430659078	0.53023480839166	0.3845418616181	1517883822.2767	0.34500670433044	1.1145924319482	0.46082489331835	0.41906925645645	1.21466989248729	0	5.7601640440638	105.358847221941	10.2510607053373	4.96419252567398	120.574100452952	0.11045	0.09651	0.06990	56	66	0.02782	7.84075	3.90207	0.19584	242.27919
122623	4953959	3	8	NO	6.79	32.5	3.0800857509439	6.5391358875936	7.6036685632779	1517796011.2276	FALSE	1.2740073204041	2.4176358342799	1.1078230095665	0.8695578053783	0.23610729191771	0.185326479790414	1.7032708740474	1517796010.1266	1.1010060310364	1.5470132097679	0.30550548926315	0.84576947243626	0.768178782490519	0	11.810891364256	70.8823860929701	9.1696651313686	0.41651583160014	80.4685670559388	0.03619	0.03188	0.04538	34	8	0.02040	3.95899	2.60416	0.12861	122.33277
123394	4986666	3	8	NO	6.86	28.7	2.8240173496181	5.4096692437771	7.2472987689932	1518466103.0671	FALSE	1.1880128383636	2.3770932926179	1.1117409277169	0.9357987488151	0.59828377122527	0.503600425774322	1.7868142842617	1518466102.2791	0.78800868988037	2.2675058120653	0.59478203416133	0.7811655423843	0.99131589843621	0.085936836744043	9.8966783936283	73.4851868959620	11.3886506286598	3.29821928774475	88.1720568123666	0.04070	0.03392	0.04543	101	19	0.04103	6.73939	2.85346	0.17845	208.24723
122623	4953961	3	8	NO	6.79	32.5	3.9454832483332	8.6119035430644	7.9204583844412	1517796485.1093	FALSE	1.6620094776154	2.3739234351383	1.0688350781541	0.6430980644513	0.69626271344911	0.418928244890689	1.7549498324173	1517796484.0402	1.0690059661865	1.6416651430654	0.25606675626828	0.71720698421761	0.67091017908546	0	11.051640121922	52.3875879923150	3.8445843407027	1.63145189332102	57.8636242263387	0.03129	0.02832	0.04257	39	7	0.02151	3.34369	1.87261	0.12490	103.31997
123394	4986665	3	8	NO	6.86	28.7	2.2791372384458	2.3177997220904	7.6909153870182	1518465664.4024	FALSE	0.96101045608521	2.37160503719193	0.9135751777428	0.950640205793761	0.57357411083264	0.59684481807738	2.7916738615923	1518465662.2544	2.1480233669281	1.2996478085733	0.57186171570138	0.77739425552614	0.361911451940067	2.2034753365625	7.1989049583812	90.4242882477049	14.5288997482336	5.72694781802561	110.680135813964	0.03670	0.02998	0.04613	12	1	0.01219	4.00554	3.58188	0.16688	123.77124
122756	4958964	3	8	NO	5.55	20.4	2.5530980917738	3.1381932111844	5.9661918369146	1517886299.9643	FALSE	1.0800206661224	2.3639344800134	0.77302644617797	0.715751531823338	0.21993042221456	0.20363538320445	2.4735261515608	1517886298.2042	1.7600338459015	1.4053855596702	0.10214212551746	0.50942541626179	0.289440693113978	0	8.8286761691602	79.9405788210801	7.32859952848639	0.593202404056136	87.8623807536226	0.05441	0.04950	0.06287	17	1	0.02108	3.42834	2.84344	0.19934	105.93576
123394	4986664	3	8	NO	6.86	28.7	1.8479185281224	1.6279722519178	5.5467256609892	1518465420.1817	FALSE	0.78900861740112	2.34207648353598	0.99944279711622	1.26670707400920	0.30276348135157	0.38372645706815	0.40996629155592	1518465419.7497	0.43200469017029	0.94898574224812	0.29971874960136	0.35221413465317	0.81530164525374	0	6.803610699577	107.411030711885	31.41948983641640	2.88330260896110	141.713823157263	0.07417	0.05622	0.04849	32	24	0.01049	6.39787	4.58621	0.10468	197.69410
123394	4986663	3	8	NO	6.86	28.7	2.6660901600387	3.7118856823457	6.08359300465	1518464830.1313	FALSE	1.1770129203796	2.2651324500150	0.91407191164259	0.776603124584046	0.23046162039815	0.195802116024201	1.696013051599	1518464828.8573	1.2740137577057	1.33123605717826	0.2277361494893	0.82338517853312	0.646292219022743	1.2359138363477	9.6071232308125	67.3495125893307	7.91672429526222	0.503247950999626	75.7694848355925	0.04918	0.04371	0.03868	21	5	0.01467	3.31153	2.45209	0.10877	102.32626
122756	4958958	3	8	NO	5.55	20.4	2.6902517340148	4.1805852174613	5.7993266440599	1517884376.0713	FALSE	1.1980230808258	2.2455758800243	1.0143962672347	0.8467251453415	0.41011965773697	0.342330347637604	2.0110749405613	1517884374.0523	2.0190386772156	0.9960556790000	0.45442377889919	0.55354842803394	0.274164350728201	2.2788331698446	6.6953642678976	65.0307508310491	9.2458791619922	1.51131189606828	75.7879418891096	0.05510	0.04728	0.06016	8	1	0.01093	2.71699	2.45268	0.17895	83.95504
123394	4986659	3	8	NO	6.86	28.7	1.968595095269	1.556656226837	6.6225179649586	1518463975.001	FALSE	0.88500952720642	2.22437729171456	0.82036685062904	0.92695821390598	0.37462547998076	0.42330107017411	0.96534264748137	1518463974.385	0.61600685119629	1.56709725810138	0.42631491281447	0.41738076103839	0.67755863466102	0.30837060184798	7.9170194667883	86.3768661687571	15.00033133594460	3.12809022192282	104.505287726625	0.04304	0.03557	0.04011	62	12	0.01953	5.74800	3.38205	0.11562	177.61306
123427	4988056	3	8	NO	5.56	16.1	2.3236207996691	2.5155303116176	7.7113534565587	1517963711.8201	FALSE	1.0800220966339	2.1514567219607	0.9368157356133	0.8674042304626	0.43394379487467	0.401791589475012	1.4729299505994	1517963710.8481	0.97201991081238	1.51532899091375	0.43713102766602	0.58523052354032	0.60207668282351	0.61495688513617	8.4382443515739	66.2157147819929	10.7631381488918	2.30939130318193	79.2882442340666	0.02939	0.02454	0.05653	36	6	0.02712	3.93359	2.56596	0.16466	121.54787
123394	4986656	3	8	NO	6.86	28.7	3.2573390023716	7.0766232673947	7.8331359640274	1518462776.806	FALSE	1.5220165252686	2.1401469355247	0.94270230028448	0.619377177996221	0.30849591571242	0.202688939699901	1.4332471134123	1518462776.1149	0.69100761413574	2.07414084026396	0.30671419835937	0.80244080763781	1.16126188948213	0.59732206338833	11.395566394084	46.4939344726148	3.89421131164959	0.417031843240032	50.8051776275044	0.02572	0.02354	0.03353	96	30	0.03786	5.73284	1.64418	0.17001	177.14475
122756	4958960	3	8	NO	5.55	20.4	1.340587562672	1.2715261965637	7.6731456110051	1517884696.2995	TRUE	0.63701224327087	2.1044926166387	1.3515932974947	2.12176973327022	0.60300810840561	0.94661933860069	0.5339487058115	1517884695.9645	0.33500647544861	1.59384592520633	0.59791251503222	0.47234999679178	1.40997273607697	0.11241090046522	7.9059882495828	107.417617876576	109.188576531342	21.73358896463280	238.339783372551	0.05263	0.02372	0.10059	117	92	0.04635	14.47189	7.71326	0.28799	447.18137
122756	4958965	3	8	NO	5.55	20.4	2.2759559483916	2.0952391145686	4.9247741955706	1517886563.5593	FALSE	1.1020212173462	2.0652560155533	0.94351592873002	0.856168569060875	0.26858263477534	0.243718206644078	0.96989301494027	1517886562.9553	0.60401153564453	1.60575246945460	0.086515985826013	0.51568481136524	0.85376649440141	1.020100287156	5.990723089362	59.7979532461073	10.2767806824811	0.832749681416706	70.9074836100051	0.06575	0.05545	0.05177	66	19	0.03386	5.03257	2.29474	0.17577	155.50634
123394	4986666	3	8	NO	6.86	28.7	2.6019053241435	3.0385209066953	7.7582185318923	1518466098.8881	FALSE	1.275013923645	2.04068777280894	0.88887777844198	0.697151428669001	0.24182945708627	0.189668091149099	1.6150053577536	1518466097.8521	1.0360112190247	1.5588685991972	0.2392579556343	0.69417648730076	0.670047268362844	0.11383430258177	10.560726513261	50.4622581463151	5.88935589619648	0.435915290692117	56.7875293332037	0.02455	0.02182	0.03140	36	7	0.01929	3.22726	1.83778	0.09994	99.72247
122623	4953962	3	8	NO	6.79	32.5	2.1349184673616	1.8252752024307	8.0849903312343	1517796897.5866	FALSE	1.0580060482025	2.0178698136828	0.4920281109423	0.4650522667410	0.5738248316647	0.5423644152504	2.0453741096339	1517796895.8266	1.760009765625	1.16213793217651	0.57273585544764	0.9293175659293	0.528018414488336	0.019474690292098	10.88462488158	59.4602348868403	3.1582307989184	4.2955888703924	66.9140545561511	0.02210	0.01964	0.03134	12	2	0.01114	2.62839	2.16550	0.10131	81.21723
122623	4953962	3	8	NO	6.79	32.5	1.8747840398856	1.4717516159789	6.9320541782244	1517796917.0327	FALSE	0.96100521087646	1.95085730927073	1.2821124970599	1.33413688349367	0.70766224354557	0.73637711381415	1.2033529788364	1517796916.2657	0.76700448989868	1.56889952364602	0.60996465626548	0.71204357286698	0.92834342203269	0	8.0999483295809	61.1862379725381	28.6156439090968	8.71772782874442	98.5196097103793	0.04021	0.02497	0.04191	50	17	0.02273	5.35473	3.18834	0.12656	165.46117
122623	4953962	3	8	NO	6.79	32.5	2.693945495439	3.4200026551524	7.8547385485298	1517796902.7366	FALSE	1.414008140564	1.905183865748	0.68967011762294	0.487741263885407	0.48665089041194	0.344164136295447	1.7947602493933	1517796901.7216	1.0150055885315	1.7682269631539	0.055992216011192	0.6459342319588	0.6363849019721	1.448870644991	7.2286409429924	39.659785774128	2.59929500773981	1.29421908325812	43.5532998651258	0.02037	0.01855	0.02726	48	6	0.02415	3.14919	1.40949	0.10463	97.31006
122756	4958956	3	8	NO	5.55	20.4	1.9617995617608	1.6327024998351	6.7117289173672	1517884033.5667	FALSE	1.0370199680328	1.8917664290325	0.89380476167716	0.86189734935643	0.50216192203822	0.484235537904644	1.3685092904533	1517884032.8107	0.756014585495	1.81016255070961	0.49904712506195	0.69541682819975	0.919845782795879	0.43099017594399	6.5481907968306	53.3183122163109	11.067574525647	3.49345121550141	67.8793379574593	0.03189	0.02505	0.04664	67	17	0.04220	4.92341	2.19674	0.18073	152.13344
123394	4986665	3	8	NO	6.86	28.7	2.5722832431403	2.9433524492356	8.4177233211159	1518465667.1554	FALSE	1.3720149993896	1.8748215174650	0.83487045909058	0.608499513097166	0.33354121653293	0.243103185228529	0.70926266395727	1518465666.6704	0.48500537872314	1.46238102724660	0.24973055865331	0.47341655971696	0.97610579281267	0	7.6336022019548	39.5812479706577	4.16955872201484	0.665504387219372	44.4163110798919	0.01755	0.01564	0.02643	68	30	0.02071	4.62433	1.43742	0.11507	142.89195
122623	4953962	3	8	NO	6.79	32.5	2.1583873645421	1.7876988265676	7.4230262556387	1517796900.5446	FALSE	1.1770067214966	1.8337935757900	0.89348068782939	0.759112646946741	0.22884816273175	0.194432332927345	1.6688122779034	1517796899.6266	0.91800498962402	1.81786841767263	0.22252714717541	0.802758986099	0.874460373497294	0	9.4304232875981	44.1418402508703	7.56418243290597	0.496233997721179	52.2022566814974	0.02276	0.01924	0.02720	56	13	0.02783	3.90579	1.68939	0.11192	120.68892
123394	4986669	3	8	NO	6.86	28.7	2.4674736902471	2.6500400372995	9.8024428904552	1518466931.0702	FALSE	1.3710148334503	1.7997425192238	1.591211598459	1.16060859418607	0.55242850413417	0.402934009651761	1.7677802200449	1518466930.2061	0.86400938034058	2.04601970796667	0.35462528009943	1.0372160583091	1.20046851563144	0	11.349454818938	36.5011951165900	15.1795149583531	1.82959169957217	53.5103017745153	0.01558	0.01063	0.03182	75	26	0.03770	4.98824	1.73172	0.14940	154.13666
123427	4988054	3	8	NO	5.56	16.1	1.9225751033176	1.6962188832615	6.7233961835487	1517962664.8157	FALSE	1.0690219402313	1.7984430730221	1.5414453434542	1.4419211481485	0.89095936605501	0.83343412564782	1.9271104258061	1517962663.7037	1.1120226383209	1.7329776925369	0.88265602627571	0.76119814741494	0.684516772576062	0.79911718782298	7.5886997729855	46.7450098936317	30.0486446742907	10.0388605900836	86.832515158006	0.04191	0.02256	0.06128	42	7	0.03541	4.37113	2.81011	0.19448	135.06797
122623	4953960	3	8	NO	6.79	32.5	1.6367765728224	1.3367172243112	10.118718320777	1517796202.2577	TRUE	0.93900537490845	1.74309606372805	0.60475813651079	0.64404118727196	0.67039130885333	0.71393766933303	0.87575787857235	1517796201.7827	0.47500276565552	1.84369006223316	0.27593448285309	0.94352806368791	1.98636330545530	0.15502386840411	13.043452218205	49.9922921790123	6.82476480719948	8.38650479952764	65.2035617857394	0.01220	0.00936	0.02710	111	128	0.05023	9.84150	2.11015	0.19034	304.10250
123427	4988055	3	8	NO	5.56	16.1	1.8725276985995	1.5904376616605	8.550227791613	1517963254.8768	FALSE	1.1230227947235	1.6673995464718	0.55180157171758	0.491353848123305	0.61838352068966	0.550642002633537	1.6071905528075	1517963253.9267	0.9500195980072	1.6917446294569	0.015647117049355	1.4284342613684	1.5035839938089	1.7453034072068	7.0311159338663	38.2489282291032	3.32145700901075	4.17136876005833	45.7417539981723	0.01434	0.01199	0.03391	47	37	0.05225	4.17645	1.48032	0.17662	129.05237
123394	4986655	3	8	NO	6.86	28.7	1.7297468916416	1.589363760033	7.0995995711363	1518462509.083	TRUE	1.0680117607117	1.6195953595950	1.6925619736424	1.5847784040454	0.56428709691063	0.528352886802109	0.18667094642292	1518462508.91	0.17300176620483	1.07901179576344	0.5620495457016	0.4248144858182	2.45554999314417	0	8.4616437021425	37.9459557760773	36.3320194044869	4.03831895994686	78.3162941405111	0.03387	0.01641	0.03627	104	538	0.04820	23.32618	2.53451	0.38791	720.77898
123394	4986668	3	8	NO	6.86	28.7	2.5536455938844	3.6443375998491	6.541294039933	1518466783.2896	FALSE	1.6730182170868	1.5263704649499	0.56994334744748	0.340667747443846	0.61882918157899	0.369887891989931	2.3929570753549	1518466782.6625	0.6270067691803	3.8164772582651	0.38654789699017	1.0251116777889	1.6349292036018	0	5.033696729587	21.5153156342016	1.07174101589639	1.26347904745499	23.850535697553	0.01903	0.01717	0.01730	359	66	0.11550	14.51852	0.77186	0.44748	448.62219
122623	4953953	3	8	NO	6.79	32.5	2.2232520520674	2.1148706059681	7.7687048401716	1517792535.721	FALSE	1.4580082893372	1.5248555638035	0.65808684115932	0.451360150674096	0.45673211900832	0.313257559883934	0.50216127456993	1517792535.073	0.64800357818604	0.77493595942114	-0.091667778035426	0.56208917750437	0.86741678044098	0	9.6246314666376	24.6391605866483	2.15881247095409	1.03985219283407	27.8378252504365	0.01372	0.01215	0.01797	14	18	0.00925	1.94483	0.90090	0.05602	60.09519
123394	4986662	3	8	NO	6.86	28.7	2.3444318924395	2.1404466308506	9.333445836443	1518464548.7052	FALSE	1.6520180702209	1.4191321116276	0.94839719880276	0.574084034489977	0.39393686962109	0.238457966484843	2.2045466060175	1518464546.1792	2.5260274410248	0.8727326434439	0.39834586067446	0.53421443485674	0.211484018811772	4.7607255517688	5.3130814161678	18.8347276535791	3.08222705733407	0.531786566586928	22.4487412775001	0.00869	0.00729	0.01608	5	0	0.00540	0.88611	0.72650	0.04961	27.38087
122623	4953958	3	8	NO	6.79	32.5	1.5609614967589	1.1011307142164	10.506223145222	1517795059.2492	TRUE	1.1880066394806	1.3139333105422	0.82433170775259	0.693878030945172	0.23871161243954	0.20093457772585	0.21052473090043	1517795058.3422	0.90700507164001	0.23210976154716	0.0064654711830751	0.22293712972375	0.24579479949395	2.976281489017	8.6573290242608	22.4520634960400	6.26146403988129	0.525072136968312	29.2385996728896	0.00642	0.00493	0.01538	1	1	0.00078	1.00924	0.94623	0.02892	31.18543
123394	4986656	3	8	NO	6.86	28.7	1.9832669728271	1.5583142719745	6.767272411474	1518462774.1499	FALSE	1.5220167636871	1.3030519900600	1.7949635583564	1.1793323182644	1.0171394838283	0.6682840216321	0.66026400451722	1518462773.7939	0.3560037612915	1.85465457477734	1.0062958610967	0.35268808931085	0.990686413063105	0	9.5217580883286	17.2358432428810	14.1182688580213	4.5334747673359	35.8875868682382	0.02434	0.01169	0.02369	149	43	0.02962	7.37090	1.16141	0.18550	227.76081
122756	4958958	3	8	NO	5.55	20.4												3.5053715818096	1517884372.2593	1.0580203533173	3.3131419171842	1.4853107309715	0.63383957080909	0.599080697097896	0	8.5771727904595				0				160	5	0.11604	5.35708	0.00000	0.11604	165.53388
135335	5485521	1	6	NO	4.24	5	2.1391795010296	4.03924098709383	5.57954725532778	1528744277.44271	FALSE	0.410995960235596	5.20486746342556	1.3608674845232	3.311	1.22381098856112	2.978	1.74711926124673	1528744276.63072	0.811992406845093	2.15	1.21436256741171	0.806099369917175	0.9927	0	7.00942844706844	678.920655453297	274.76173	222.20471	1175.88710	0.42532	0.24556	0.73651	58.73	12.5014	0.08814	61.13304	57.64152	2.32436	1247.11395
148052	6018063	1	6	NO	4.51	5	3.06265260173647	8.18115117871232	4.94332486577957	1540523008.27291	FALSE	0.633816242218018	4.83208286209079	1.44746362519117	2.284	1.06486103155733	1.680	2.55214811369959	1540523007.2942	0.978716373443604	2.61	1.05215547734756	0.744976709094365	0.7612	1.35065374794716	7.0163014338642	379.439558783386	84.75444	45.87045	510.06445	0.36246	0.26963	0.43545	71.56	6.0975	0.10238	28.80996	25.00316	1.27654	587.72328
149002	6057060	1	6	NO	4.81	10.4	2.96794727642947	8.15141027610552	4.70508462640037	1541734799.17921	FALSE	0.622985363006592	4.76407224417898	1.25572403247319	2.016	0.809119083838887	1.299	1.91079950545327	1541734798.45623	0.722982883453369	2.64	0.803510493063361	0.704170807252229	0.9740	0	6.56767085305439	375.245989173294	67.17259	27.88872	470.30730	0.36260	0.28931	0.34696	99.51	13.5148	0.09677	28.59490	23.05428	0.92976	583.33591
135335	5485521	1	6	NO	4.24	5	2.05163792893562	3.45869381389142	5.03999024159701	1528744273.93874	FALSE	0.433995962142944	4.72732031608137	1.02887002166385	2.371	1.0106113282186	2.329	1.78193549787403	1528744273.27175	0.666993856430054	2.67	1.00578808407236	0.787711756331672	1.1810	0.287869248736263	5.3269895730898	530.373231545859	133.38322	128.69109	792.44754	0.37094	0.24826	0.52412	110.22	21.5380	0.13393	45.30414	38.84547	1.55070	924.20439
148052	6018091	1	6	NO	4.51	5	2.72351882448241	7.31065430573089	5.09272716305461	1540524010.63897	FALSE	0.5890052318573	4.62392976696384	1.30573236312637	2.217	1.04444128623233	1.773	1.83145015560948	1540524009.77096	0.868007659912109	2.11	1.03288106926542	0.564568663111712	0.6504	0	7.02157216917096	373.887142140769	85.93857	54.98546	514.81116	0.32031	0.23263	0.40843	52.83	5.0200	0.06763	28.07148	25.23584	1.12386	572.65822
148519	6037906	1	6	NO	5.34	24.95	4.36242763266806	9.18751446265608	6.90255479862198	1541094077.48776	FALSE	0.94499683380127	4.61634100414930	1.59665273619848	1.690	1.5248141844574	1.614	3.25998905559752	1541094076.45276	1.034996509552	3.15	1.46248236666673	1.05611643543944	1.0204	0.18542033643659	7.03786443778778	232.27508928568400	31.11481	28.37788	291.76778	0.15855	0.12622	0.26491	98.73	10.3620	0.10848	19.65003	14.30234	0.76257	400.86064
148519	6037906	1	6	NO	5.34	24.95	2.71444705589006	7.24939383262837	6.26534981937479	1541094073.50577	FALSE	0.611997842788696	4.4353866404514	1.36321427496835	2.227	0.956869718576952	1.564	2.09530107457953	1541094072.51577	0.989996671676636	2.12	0.949626558187859	0.750994382479976	0.7586	0.0884972417103924	7.57238614769819	331.093230614535	83.50564	41.14274	455.74161	0.19466	0.14142	0.26797	46.60	5.9870	0.05002	24.91830	22.34027	0.78241	508.33322
145293	5902855	1	6	NO	4.13	1.5	2.73530377696112	7.16476358568166	5.92408269818586	1537674951.50504	FALSE	0.634012699127197	4.31427285404004	1.42481354747154	2.247	1.14980598966264	1.814	1.81768493562618	1537674950.53802	0.967019319534302	1.88	1.14053854913834	0.965810333321071	0.9987	0.776824971468443	6.68740838354272	302.380990053857	82.04638	53.43090	437.85827	0.21672	0.14966	0.44590	37.63	10.6247	0.07496	23.82921	21.46364	1.25011	486.11595
149002	6057060	1	6	NO	4.81	10.4	2.39062007855583	5.30924060452342	4.23067836138593	1541734796.34328	FALSE	0.577986240386963	4.1361193597884	1.17363498888568	2.031	0.514373503816236	0.890	1.54286674467755	1541734795.6203	0.722982883453369	2.13	0.509301924102976	0.546680322081177	0.7561	0	6.74100569613739	304.863794808883	73.47690	14.11373	392.45443	0.34721	0.26972	0.26861	64.88	8.1455	0.06252	22.81764	19.23796	0.71711	465.47985
148519	6037901	1	6	NO	5.34	24.95	2.67940882389537	6.87527372616004	6.45636210536391	1541098430.03316	FALSE	0.667995691299438	4.0111169260436	1.32492744299663	1.983	1.113605725274	1.667	2.19180862440523	1541098428.87717	1.15599226951599	1.90	1.10070950655183	0.737979002062259	0.6384	0.798404334250074	8.28951660149942	248.081402022049	60.65972	42.85279	351.59392	0.15436	0.10892	0.22565	32.03	3.6313	0.03961	18.98317	17.23500	0.67865	387.25674
149002	6057065	1	6	NO	4.81	10.4	2.12011892768624	3.74952802843209	4.2643015072689	1541734397.19309	FALSE	0.532991886138916	3.97776961117503	1.06213282866931	1.993	0.548205072600033	1.029	1.64659651693268	1541734396.05811	1.13498282432556	1.45	0.544124157844599	0.528691197532561	0.4658	0	6.85403516729816	305.770707506184	76.74200	20.44380	402.95650	0.32359	0.24554	0.25433	19.10	1.9691	0.02832	20.78559	19.75277	0.83753	424.02608
148052	6018059	1	6	NO	4.51	5	2.40899987354636	4.56462102075663	5.06614464360698	1540522041.52407	FALSE	0.622819662094116	3.86789309998105	0.89425386075611	1.436	0.505769005007397	0.812	1.70403900635122	1540522040.7233	0.80076789855957	2.13	0.502208857136997	0.741433891998576	0.9259	0	7.00185423586667	247.413752033071	34.09353	10.90573	292.41301	0.19441	0.16449	0.24531	58.25	11.0271	0.07472	17.72978	14.33397	0.69354	361.68750
133839	5422022	1	6	NO	4.01	3	2.32008606666048	4.25402694852129	4.86962544365203	1527470527.27206	FALSE	0.612006187438965	3.79095197773938	0.936787160032266	1.531	0.506916144165699	0.828	1.53198635539773	1527470526.63806	0.634006500244141	2.42	0.50276242892116	0.56054907865739	0.8841	0.704276464479234	6.50353319457127	241.86775735708	39.43226	11.54628	292.84629	0.20707	0.17102	0.30536	94.86	12.6994	0.11618	19.62755	14.35521	0.85004	400.40193
145485	5910627	1	6	NO	4.44	3.31	1.95018153359219	2.45517961151118	6.1249809759573	1537902949.03255	TRUE	0.522004127502441	3.73595040890375	1.10026653080352	2.108	1.14761145522924	2.198	1.9771451928158	1537902948.49855	0.53400444984436	3.70	1.13632605200468	0.925433373324998	1.7330	0	6.33993289741985	275.400987542086	87.66197	95.36855	458.43150	0.17476	0.10499	0.33257	264.41	57.9286	0.23922	38.27310	22.47213	1.14586	780.77121
149002	6057066	1	6	NO	4.81	10.4	2.36274679592685	3.78329348133437	5.60369448683548	1541734505.87244	FALSE	0.633990526199341	3.72678565102714	0.858129060432229	1.354	0.604361713896592	0.953	1.73356794543366	1541734505.20445	0.667989730834961	2.60	0.601880749861935	0.745367743693706	1.1158	0	7.240341795766	225.643738134737	29.76419	14.76328	270.17121	0.14944	0.12481	0.20283	103.85	19.1986	0.09733	19.27552	13.24369	0.60626	393.22053
131567	5328507	1	6	NO	3.8	1.5	1.98855297775355	2.93728573743479	5.16504495382761	1525650837.59511	FALSE	0.534000635147095	3.72387755157966	1.32131223773419	2.474	1.06080235878615	1.987	1.97098672920119	1525650836.87311	0.722000598907471	2.73	1.0512302867758	0.654904219231748	0.9071	0.505612750638404	6.02819629205377	267.476871741908	118.09264	76.11686	461.68637	0.25319	0.14669	0.46777	106.31	11.7376	0.16172	28.41855	22.63168	1.38154	579.73835
131629	5330573	1	6	NO	4.94	7.4	1.85280582642498	2.24321886745257	3.81555314682763	1525751977.21125	FALSE	0.499982833862305	3.70573887929769	0.931324225568081	1.863	0.644570766976002	1.289	1.5056465816269	1525751976.03229	1.178959608078	1.28	0.64006075092465	0.772486555425997	0.6552	0.395603557225483	5.789630903974	282.899225789821	71.47822	34.23838	388.61582	0.36565	0.26618	0.21814	14.25	3.7508	0.02382	19.93214	19.04980	0.76643	406.61568
134536	5451066	1	6	NO	4.98	34	2.42044551251155	5.13085734498689	4.16414440075619	1528152475.37823	FALSE	0.655965566635132	3.68989720745186	0.909905838262078	1.387	0.573572339020942	0.874	1.21274439171946	1528152472.84336	2.53486585617065	0.48	0.569495497361664	0.293160083888532	0.1157	1.80192473608585	4.15403469055446	213.788685823022	30.21252	12.00523	256.00644	0.26533	0.22158	0.18552	0.93	0.0543	0.00276	12.59759	12.54934	0.90588	256.99085
134536	5451126	1	6	NO	4.98	34	2.40878190398658	5.33747861117926	4.26140480815886	1528149066.78976	FALSE	0.656994104385376	3.66636760955415	1.2983996893407	1.976	0.979176814869456	1.490	1.81691935209671	1528149065.93377	0.855992555618286	2.12	0.971295185590586	0.602044864422766	0.7033	0.711613184144783	5.84353478281953	210.740384113371	61.23075	34.82371	306.79485	0.30410	0.20889	0.22267	54.21	5.9523	0.05689	17.98821	15.03896	0.61334	366.95954
146255	5940319	1	6	NO	5.34	24.95	2.81862799166552	6.88636538400571	8.17646366735774	1538679747.67872	FALSE	0.778993368148804	3.61829523448151	1.62100538818804	2.081	0.995788821679171	1.278	2.48317487710913	1538679745.79874	1.87998342514038	1.32	0.985577958936825	0.617347648475823	0.3284	3.27022244075976	5.89647119232148	173.105738345796	57.25387	21.60580	251.96541	0.08044	0.05526	0.18858	9.56	0.5908	0.01833	12.84876	12.35125	0.66962	262.11471
135335	5485518	1	6	NO	4.24	5	2.19999901168647	3.10155366681137	5.23535386715531	1528746890.22219	FALSE	0.609977245330811	3.60669029628038	0.759345290612189	1.245	0.432652377310442	0.709	1.50070258199116	1528746889.6222	0.599993705749512	2.50	0.432088074258661	0.61608247209631	1.0268	0.077132297456286	5.56186088446948	219.655100950776	26.16827	8.49522	254.31858	0.15506	0.13393	0.23641	107.40	18.0998	0.11475	18.61833	12.46660	0.70036	379.81401
148052	6018074	1	6	NO	4.51	5	2.19299320026302	3.07502499857164	4.01825771726577	1540521165.34657	FALSE	0.611994028091431	3.58335718912504	0.663124821855499	1.084	0.633308338694532	1.035	1.46211065701839	1540521164.61258	0.7339928150177	1.99	0.631190901285654	0.670191399783654	0.9131	0	5.92176579750029	216.10770040429	19.75997	18.02296	253.89063	0.26365	0.22441	0.20929	55.68	11.6993	0.06662	15.74867	12.44562	0.58246	321.27287
149002	6057074	1	6	NO	4.81	10.4	1.90834874882746	2.20287152061595	3.47522547276471	1541735900.07416	FALSE	0.534003019332886	3.57366658939776	0.536029894049244	1.004	0.381262425835091	0.714	1.20634465397341	1541735899.37415	0.700003623962402	1.72	0.379249569463535	0.445764738622103	0.6368	0.515123529738879	4.86903025267012	246.332421404215	19.43498	9.83228	275.59968	0.33386	0.29841	0.17428	43.70	5.9669	0.04117	15.94443	13.50979	0.47531	325.26634
148052	6018064	1	6	NO	4.51	5	2.4987858099764	4.96489182294308	4.97740283414785	1540523280.89691	FALSE	0.6997971534729	3.5707287427158	0.838428695349475	1.198	0.494558359884313	0.707	1.5615566627574	1540523279.96318	0.933729410171509	1.67	0.490890970743431	0.695222326130207	0.7446	0	6.23920923536921	187.6630506641120	21.12774	7.35116	216.14195	0.16727	0.14523	0.20373	30.85	6.1154	0.04649	12.40734	10.59519	0.55692	253.10975
133415	5404236	1	6	NO	4.91	1.9	1.41733169833858	1.45580747554282	5.41583838575309	1527223403.41264	TRUE	0.400998592376709	3.53450542042577	1.09207886907613	2.723	0.64933460842269	1.619	1.17616878321303	1527223402.87965	0.532997846603394	2.21	0.646710047778014	0.552415858119004	1.0364	0.548084943312423	6.14815469577027	320.886673136788	190.50952	67.35127	578.74746	0.21677	0.12019	0.26374	94.10	20.7584	0.06957	34.00040	28.36997	0.73621	693.60811
131567	5328482	1	6	NO	3.8	1.5	1.9253833694327	2.22704873784501	5.06762578469425	1525652139.71795	FALSE	0.54499626159668	3.5328377552387	1.20733028692741	2.215	0.935027269673838	1.716	1.64309162818322	1525652139.15096	0.566996335983276	2.90	0.927961747632569	0.521356355337068	0.9195	0.0161786551809406	5.37055266147363	235.879982833694	92.74892	55.62951	384.25841	0.22342	0.13715	0.39734	152.55	15.3591	0.18063	27.06717	18.83620	1.16497	552.17026
149002	6057066	1	6	NO	4.81	10.4	2.9232466680215	6.92196456553721	6.30586125500011	1541734509.34239	FALSE	0.833987474441528	3.50514457064121	1.13602290913706	1.362	0.944228299184929	1.132	2.54201519617571	1541734508.04041	1.3019802570343	1.95	0.939039880649689	0.949728222034347	0.7294	1.1873404637124	5.25201680654765	151.736327016212	22.91568	15.83116	190.48317	0.10945	0.08719	0.18812	30.16	4.2094	0.05298	11.02201	9.33741	0.56873	224.84905
146057	5933536	1	6	NO	5.1	8.17	2.01099757312587	2.52262484012462	4.75765157732593	1538448154.72823	FALSE	0.577632427215576	3.48144854474272	0.655470127809993	1.135	0.938609991588433	1.625	2.09462696684645	1538448154.03867	0.689561367034912	3.04	0.927321391822072	1.11667863502135	1.6194	0	5.0223041828406	216.125305654331	22.96087	47.08178	286.16796	0.20008	0.15111	0.17412	137.83	39.1719	0.12856	22.70422	14.02784	0.61823	463.16609
149002	6057065	1	6	NO	4.81	10.4	2.2789512138057	3.30503873705769	5.28074731339001	1541734400.27305	FALSE	0.655990123748779	3.47406329958476	0.880120958536748	1.342	0.437597405881684	0.667	1.31508181768708	1541734399.43906	0.833987236022949	1.58	0.435685643363005	0.52839017656832	0.6336	0.129971598233652	6.66412663311307	189.50268965586	28.26377	6.98707	224.75352	0.14485	0.12213	0.17459	30.71	4.9576	0.03522	12.76569	11.01733	0.45948	260.42001
145293	5902856	1	6	NO	4.13	1.5	2.57086114695909	4.34984653604874	5.36687722842669	1537675196.90095	FALSE	0.745014905929565	3.45075128899789	0.842624743215053	1.131	0.541131296415527	0.726	1.18399481004238	1537675196.29994	0.601011991500854	1.97	0.538339192383108	0.665590088755271	1.1074	0.741202462423536	6.63211552378047	164.626437600911	17.68523	7.29370	189.60537	0.13436	0.11666	0.22689	66.51	21.0185	0.08450	13.58500	9.29438	0.59917	277.13393
148052	6018091	1	6	NO	4.51	5	1.95026729547032	2.09093596380299	5.42392912856704	1540524013.55299	FALSE	0.567004919052124	3.43959501926479	0.840383125136773	1.482	0.480713696931965	0.848	1.44613246715563	1540524011.22797	2.32502055168152	0.62	0.515066693557127	0.415467858525543	0.1787	1.87562806757356	4.82542382020908	214.914155133237	39.90537	13.05719	267.87672	0.14145	0.11348	0.20459	1.71	0.1415	0.00581	13.22216	13.13121	1.05072	269.73203
149002	6057067	1	6	NO	4.81	10.4	2.43914794025853	4.58548950947176	4.79121557246075	1541734632.42452	FALSE	0.710989236831665	3.43063975360295	1.3133981780646	1.847	0.642506795835428	0.904	1.72014695599455	1541734631.50054	0.923985958099365	1.86	0.640073397759262	0.528120256111053	0.5716	0.227335361154311	7.08217263182551	170.500018348956	49.43573	11.83051	231.76626	0.19667	0.14468	0.19513	38.63	3.6417	0.04626	13.43344	11.36109	0.53057	274.04221
149002	6057060	1	6	NO	4.81	10.4	2.49096993114612	4.3572052860219	3.46268423196201	1541734802.37114	FALSE	0.733982801437378	3.39377152471146	0.951574636895028	1.296	0.596317011945696	0.812	1.56397121541268	1541734801.49216	0.878979206085205	1.78	0.591596281195166	0.740659343954332	0.8426	0	6.63893145370216	161.62797947811	23.58660	9.26262	194.47720	0.32616	0.27107	0.16903	37.10	8.3203	0.04728	11.75962	9.53320	0.45821	239.89621
145485	5910607	1	6	NO	4.44	3.31	1.90479064659973	1.99866953901651	4.0225008122286	1537901751.72255	FALSE	0.566999673843384	3.35942106225244	0.757290020465092	1.336	0.767012709842782	1.353	1.84633295121897	1537901750.95555	0.7669997215271	2.41	0.764866184407352	0.777790587028426	1.0141	0.328638482268738	5.42452561632379	205.01389517415	32.40509	33.24252	270.66151	0.25985	0.19683	0.21328	77.82	13.8095	0.09767	17.75919	13.26772	0.67166	362.28747
145293	5902859	1	6	NO	4.13	1.5	2.26729451623528	3.95943319401008	5.37427437037239	1537675636.77275	FALSE	0.679013729095459	3.33909966629928	1.30433071392937	1.921	0.671757023579167	0.989	1.81364367840432	1537675636.01674	0.756015062332153	2.40	0.669573902930914	0.597402319523305	0.7902	0	5.89040972197976	169.128747871162	55.97280	14.84657	239.94811	0.15455	0.10893	0.26170	78.41	8.5071	0.10554	16.02261	11.76216	0.75341	326.86127
146057	5933536	1	6	NO	5.1	8.17	3.15008038321005	7.52087060527614	4.29264485485527	1538448149.94827	FALSE	0.944399118423462	3.3355393093427	0.746198554606885	0.790	0.429332396285394	0.455	1.28126514784153	1538448149.4366	0.511674404144287	2.50	0.334346251088061	0.813219599314087	1.5893	0	5.18252452458856	121.342734603836	6.80894	2.25402	130.40569	0.18311	0.17038	0.12972	126.22	50.8478	0.09543	15.07231	6.39244	0.47159	307.47519
131629	5330580	1	6	NO	4.94	7.4	2.27048636842102	3.09774206612741	5.40245423271539	1525751394.17926	FALSE	0.701008796691895	3.2388842752553	1.21536150034172	1.734	1.13623089425233	1.621	1.88326698004537	1525751393.64525	0.534006595611572	3.53	1.12995479002552	0.64668396110463	1.2110	0	5.89614122823765	154.136189730297	44.16495	38.60113	236.90227	0.15589	0.10143	0.18644	239.89	28.2867	0.16078	24.75901	11.61286	0.70031	505.08389
134536	5451087	1	6	NO	4.98	34	2.01279211187104	2.42584925392948	5.39981632050724	1528151772.549	FALSE	0.621989488601685	3.2360548670944	0.927535966659029	1.491	0.517843668372604	0.833	1.59577750680997	1528151771.88101	0.667988777160645	2.39	0.513045985706858	0.681524878726475	1.0203	0.43634874150081	6.92492789048883	173.414709309309	36.82558	11.47851	221.71880	0.12958	0.10135	0.15235	88.00	16.0507	0.07678	15.96901	10.86857	0.46424	325.76779
134536	5451189	1	6	NO	4.98	34	1.9602538967243	2.03402507514621	6.54416077829882	1528148293.90844	FALSE	0.611002922058105	3.20825617350793	0.881932155561647	1.443	0.50380115213152	0.825	1.86958818917983	1528148292.85144	1.05700516700745	1.77	0.501239669684619	0.874998874365618	0.8278	0.683157863208208	8.0400043490846	173.512998422111	35.12188	11.46108	220.09596	0.08603	0.06782	0.14856	30.49	6.6776	0.04340	12.61075	10.78902	0.47404	257.25938
148519	6037901	1	6	NO	5.34	24.95	2.34827673025039	3.65880450089414	6.05365164253006	1541098426.25219	FALSE	0.733994960784912	3.19930906302029	1.01484763789064	1.383	0.63302643952099	0.862	1.61648153971153	1541098425.2842	0.96799373626709	1.67	0.629719178148179	0.809948569883595	0.8367	0.599809277749623	8.62930583207279	143.633763151064	26.82623	10.43762	180.89762	0.09927	0.07882	0.12757	29.67	7.4496	0.03453	10.68727	8.86753	0.35652	218.02022
146255	5940319	1	6	NO	5.34	24.95	2.33788765965402	3.72022776387735	5.95985867934913	1538679745.06475	FALSE	0.733993768692017	3.18516009178137	1.35265275525449	1.843	0.678614300137086	0.925	1.21656296834415	1538679744.50875	0.555994987487793	2.19	0.676410080195617	0.35219381250282	0.6334	0	7.24849281071736	142.366360591947	47.65766	11.99516	202.01919	0.11437	0.08060	0.14247	88.69	7.4334	0.05135	14.61502	9.90290	0.36952	298.14650
134536	5451134	1	6	NO	4.98	34	3.00628698716863	7.20296548896503	6.54995705755933	1528151662.2712	FALSE	0.944991588592529	3.18128438756391	1.32378064035882	1.401	0.665512973908254	0.704	1.57135866780538	1528151661.4032	0.867992639541626	1.81	0.660984621120948	0.640829496769136	0.7383	0	7.98709006565119	110.309843929092	21.38875	5.40588	137.10448	0.08274	0.06657	0.14313	38.89	6.4681	0.04349	8.94425	6.72081	0.36544	182.46270
146255	5940320	1	6	NO	5.34	24.95	1.9774435994452	2.23326154800206	3.7929907199421	1538680059.971	FALSE	0.622994661331177	3.17409397252284	0.723449696629956	1.161	0.589308916156008	0.946	1.31401216390564	1538680059.437	0.533995389938354	2.46	0.586188309394954	0.566584075572074	1.0610	0	5.77873007841162	166.568341061299	22.29466	14.79348	203.65648	0.24162	0.19762	0.12190	116.79	21.7147	0.07106	16.77284	9.98316	0.38036	342.16595
135867	5510557	1	6	NO	5.22	16	2.1759639348046	2.96977750014491	5.1414913912661	1529172814.54019	FALSE	0.689992904663086	3.15360334881573	1.00822341216482	1.461	0.555583146811963	0.805	1.264138655742	1529172813.7612	0.77899169921875	1.62	0.59051647097317	0.409671451712205	0.5259	0.412047597213728	6.56343659442782	148.459070156865	31.87256	9.67835	190.00998	0.13588	0.10616	0.13182	34.82	3.6569	0.03014	11.20033	9.31421	0.33748	228.48681
146057	5933538	1	6	NO	5.1	8.17	1.96335324520428	2.27547900100988	5.87991932939153	1538448764.69618	FALSE	0.622603893280029	3.15345481516483	0.65678002837708	1.055	0.555246911528462	0.892	0.830742031045895	1538448763.80675	0.889434099197388	0.93	0.523551180718122	0.423884231348586	0.4766	4.58494197987471	5.67491436738946	164.512392228457	18.40948	13.15752	196.07940	0.09674	0.08117	0.12859	10.10	2.6302	0.01193	10.23589	9.61174	0.33257	208.81209
135335	5485492	1	6	NO	4.24	5	2.172988488432	2.52934503999106	4.73256813859732	1528745481.88632	FALSE	0.689986705780029	3.14931935677723	0.81994365124573	1.188	0.684793026516988	0.992	1.48296515889778	1528745481.27533	0.610988140106201	2.43	0.682869268204809	0.432961870896992	0.7086	0	6.24072212010778	148.057327738684	21.08060	14.70394	183.84187	0.15517	0.12496	0.19331	99.31	8.4652	0.10035	14.29504	9.01186	0.57818	291.61887
131567	5328471	1	6	NO	3.8	1.5	2.02376614934078	2.50773874939137	3.12725973746702	1525652962.93837	FALSE	0.644955396652222	3.13783892629718	0.887800108294148	1.377	0.562075624099101	0.871	1.44220986767281	1525652962.16042	0.77794623374939	1.85	0.55924731207169	0.462992709309787	0.5951	0.816721559614841	5.36837515130173	157.242100366143	30.26067	12.12935	199.63213	0.36069	0.28410	0.24429	45.50	4.6896	0.07409	12.24634	9.78589	0.67445	249.82530
148052	6018062	1	6	NO	4.51	5	2.47407741425745	4.094828351552	4.70872282712581	1540522864.96744	FALSE	0.788771390914917	3.13662164063494	1.23863053443474	1.570	0.828942132758725	1.051	2.14402261525434	1540522864.11069	0.856751680374146	2.50	0.824001392981341	0.825302769404565	0.9633	2.13860177896636	6.35080568126648	128.47254974905	32.20085	14.42222	175.09562	0.17066	0.12522	0.18603	75.29	11.1558	0.09976	12.82060	8.58312	0.57969	261.54029
146057	5933584	1	6	NO	5.1	8.17	2.09390787615515	2.43998039849915	5.07020107723525	1538450381.46807	FALSE	0.668008089065552	3.13455467146248	0.542225128155308	0.812	0.224450563221413	0.336	2.42210594887206	1538450380.10005	1.36801648139954	1.77	0.220624239714294	0.912707150790909	0.6672	0.767784281731228	5.87282936204252	151.498105242941	10.15901	1.74074	163.39785	0.11633	0.10786	0.11497	23.60	3.3514	0.03884	9.33095	8.00970	0.40823	190.35129
135335	5485525	1	6	NO	4.24	5	2.19116949772131	2.54210135546259	4.34601899098655	1528745218.19086	FALSE	0.700993299484253	3.12580662230785	0.852236040832882	1.216	0.29980169833223	0.428	1.1582650473456	1528745217.64587	0.544994831085205	2.13	0.23006663454321	0.361922600233577	0.6641	0	6.37380119909928	143.564668288125	21.71778	2.68759	167.97004	0.17079	0.14598	0.17944	85.36	8.3347	0.07782	12.82691	8.23383	0.49687	261.66901
148052	6018092	1	6	NO	4.51	5	2.23132709228852	3.02707874167789	6.79594434273601	1540524322.11472	FALSE	0.723006248474121	3.08617954132161	1.00224308831088	1.386	0.750666787024409	1.038	1.49772835257486	1540524321.08071	1.03400921821594	1.45	0.749107548275785	0.604550282609523	0.5847	1.95873647428025	7.08044906262206	135.68678426797	27.37519	15.35697	178.41895	0.07652	0.05820	0.17375	20.90	3.4051	0.03385	9.93741	8.74603	0.47977	202.72326
145293	5902839	1	6	NO	4.13	1.5	2.14395509387932	2.30200492057891	4.82468309356447	1537674983.36014	FALSE	0.700996160507202	3.05844056596269	0.840019928753494	1.198	0.369977532067575	0.528	1.1695610237435	1537674982.70415	0.655996561050415	1.78	0.375101268508171	0.404724907876919	0.6170	0.627010545253626	5.3722910607293	137.442699392545	21.09937	4.09299	162.63506	0.13418	0.11340	0.18312	49.91	5.9766	0.05889	10.71179	7.97231	0.47630	218.52057
146255	5940316	1	6	NO	5.34	24.95	1.44460221718721	1.25202513821381	5.05675406646429	1538678643.16036	TRUE	0.477995872497559	3.02220646726314	0.842607706471715	1.763	0.253882425277242	0.531	0.350486260516052	1538678642.87136	0.288997411727905	1.21	0.249272442797467	0.342420193185318	1.1849	0	4.4717051026249	196.816425203299	66.96003	6.07897	269.85543	0.13820	0.10080	0.12393	52.42	50.0350	0.02845	18.25051	13.22821	0.27436	372.31049
145485	5910585	1	6	NO	4.44	3.31	3.09140203765344	6.99235418622106	4.79143920494132	1537903782.23073	FALSE	1.02299880981445	3.02190189078925	0.838952960577601	0.820	0.259825015373213	0.254	1.18448256249873	1537903781.64073	0.589999437332153	2.01	0.257713321002836	0.652372278000669	1.1057	0	6.85658575165317	91.94387792482700	6.77153	0.64949	99.36490	0.12131	0.11225	0.14127	70.36	21.3439	0.07520	9.36623	4.87083	0.42832	191.07105
133415	5404254	1	6	NO	4.91	1.9	2.00377876003551	2.15855432969978	5.7163074190406	1527221795.89837	FALSE	0.66700553894043	3.00414110986036	0.847912782502717	1.271	0.287457967495828	0.431	1.18449794629198	1527221795.27536	0.623005151748657	1.90	0.261343083636131	0.515918630394183	0.8281	0.632635431700515	6.79957499513861	139.36330629215100	24.95464	2.86812	167.18607	0.09350	0.07794	0.12673	59.76	11.3377	0.05034	11.68071	8.19540	0.34933	238.28656
146255	5940316	1	6	NO	5.34	24.95	1.71855105281755	1.51893233312691	5.13343097090947	1538678653.37027	TRUE	0.57799506187439	2.97329711995191	0.876098735381409	1.516	0.460298959823454	0.796	0.983400320656184	1538678652.71427	0.655994176864624	1.50	0.486403110938792	0.300805895851586	0.4585	0	6.37972223372325	157.53959223960600	40.94218	11.30173	209.78350	0.12606	0.09467	0.11650	35.29	3.3015	0.02432	12.17503	10.28350	0.29447	248.37063
131567	5328500	1	6	NO	3.8	1.5	2.4096122227632	3.20188683357406	5.25727036718613	1525650408.41766	FALSE	0.81200098991394	2.9674991196976	1.05527123408683	1.300	0.659959301200361	0.813	1.67895982130435	1525650407.71765	0.700000762939453	2.40	0.657558401749438	0.752010727862038	1.0743	0.580895461565762	6.34250031100941	111.702235204535	21.42376	8.37919	141.50518	0.11390	0.08991	0.21801	84.65	16.9820	0.13498	11.91845	6.93653	0.69750	243.13631
131061	5307665	1	6	NO	4.39	22.7	2.31801794702216	3.14751004683304	4.69049919465924	1525195666.73511	FALSE	0.788987874984741	2.93796396689492	0.832228996386604	1.055	0.429338246700552	0.544	1.52946249714161	1525195665.58912	1.14598226547241	1.33	0.382841161731895	0.686204057535828	0.5988	0.22156172449826	7.54545462245642	112.683369678755	14.52486	3.86568	131.07390	0.12878	0.11071	0.14702	16.01	3.2226	0.03133	7.36795	6.42519	0.41346	150.30616
145293	5902853	1	6	NO	4.13	1.5	3.65899832453973	8.61355742896675	5.68594384354863	1537674706.79415	FALSE	1.24602484703064	2.93653720731121	1.44919675427698	1.163	1.26981620766728	1.019	2.37394988812168	1537674705.75913	1.03502082824707	2.29	1.25125832224723	1.03804198676801	1.0029	0.307879957213717	7.44343398421171	71.28227269453800	11.18180	8.58497	91.04905	0.09614	0.07527	0.18223	52.35	10.0097	0.10367	7.52013	4.46319	0.56208	153.41069
134536	5451130	1	6	NO	4.98	34	2.16542060125367	3.05937970948292	5.63211287552252	1528150182.99006	FALSE	0.744993448257446	2.90663039563453	1.0819430903145	1.452	0.435093721499373	0.584	1.6680855318634	1528150180.53208	2.45797872543335	0.68	0.315404412734854	0.544126299442185	0.2214	1.57722074293369	5.62670624327337	116.805795874922	29.16008	4.71569	150.68157	0.09696	0.07516	0.12401	1.93	0.2054	0.00580	7.49102	7.38635	0.54072	152.81684
134536	5451132	1	6	NO	4.98	34	2.09356089567494	2.51549448298155	5.36602251958681	1528150759.36805	FALSE	0.722993612289429	2.89568380700554	1.15699991286775	1.600	0.66643692383678	0.922	2.44231615630502	1528150757.56706	1.80098438262939	1.36	0.663160028976909	0.541521596458075	0.3007	2.57745556948223	4.29355891055585	119.455194411888	36.48384	12.10464	168.04367	0.11560	0.08218	0.13422	10.52	0.5171	0.02195	8.77834	8.23743	0.49932	179.07820
131567	5328488	1	6	NO	3.8	1.5	1.7644834680654	1.85113984745056	5.68003392461046	1525651635.51356	TRUE	0.611000299453735	2.88786023450878	0.937251294193496	1.534	0.740603096482321	1.212	1.62478222240375	1525651634.52356	0.990000247955322	1.64	0.734971247675536	0.386318906737595	0.3902	0.338956964385229	6.96805269294851	140.587964420945	39.66661	24.76760	205.02218	0.10638	0.07294	0.23767	28.02	1.5842	0.05561	11.50146	10.05011	0.71271	234.62988
131567	5328475	1	6	NO	3.8	1.5	1.95625685813744	2.01468952670332	5.23846267739121	1525652367.12793	FALSE	0.67795729637146	2.88551634241220	0.652324539664629	0.962	0.352903482019587	0.521	1.23096905398124	1525652366.67196	0.455971240997314	2.70	0.352040776194698	0.552909056019163	1.2126	0.0333704977686962	4.76983579718746	126.49750574406200	14.06558	4.11663	144.67972	0.09793	0.08562	0.18610	164.63	33.2148	0.17116	16.79061	7.09214	0.73692	342.52842
135868	5510675	1	6	NO	4.93	10	3.36392037408555	8.14275887340055	8.12756877441408	1529121700.65977	FALSE	1.16801953315735	2.88002064913445	1.48353117656035	1.270	1.03355787213768	0.885	2.20322835235206	1529121699.88176	0.778012990951538	2.83	1.02800137649	0.86620968311245	1.1134	1.14494124557965	8.38370087151125	73.14393522623670	14.22592	6.90489	94.27474	0.04567	0.03543	0.12412	106.17	16.4105	0.10750	10.63009	4.62131	0.47570	216.85378
135867	5510557	1	6	NO	5.22	16	2.14780646478051	2.68918036150362	6.04650359603328	1529172805.97628	FALSE	0.745992183685303	2.87912730421659	1.02536377989555	1.374	0.47348969668939	0.635	1.46151990518567	1529172804.89829	1.07798862457275	1.36	0.469113799802674	0.419390108332419	0.3890	1.08667404958015	8.21954972566812	114.452342016814	26.08497	5.56231	146.09963	0.08167	0.06398	0.10958	17.56	1.4462	0.02060	8.09358	7.16175	0.30280	165.10906
148519	6037908	1	6	NO	5.34	24.95	2.54296286483027	4.42107063553848	6.62185419846071	1541095512.23787	FALSE	0.889997005462646	2.85727125959077	1.35424482885207	1.522	0.644847042521327	0.725	1.67053277882668	1541095511.40387	0.833997249603271	2.00	0.643347252643337	0.403098417058592	0.4833	0.121126522855935	8.9155792946227	94.4825541074571	26.79575	6.07554	127.35385	0.07082	0.05254	0.10890	49.55	2.8851	0.04202	8.81324	6.24284	0.29780	179.79009
134536	5451125	1	6	NO	4.98	34	1.63306755633862	1.56662008799928	6.22183592933634	1528148812.80997	TRUE	0.57799506187439	2.82540053377397	1.16845858017525	2.022	0.490630007337094	0.849	1.57379397217643	1528148811.87598	0.9339919090271	1.69	0.521026468784659	0.460798010023312	0.4934	0.135651809665926	7.72753471409029	142.25683511677900	72.82684	12.84024	227.92392	0.09324	0.05819	0.14553	31.31	2.6843	0.03508	12.83920	11.17274	0.43749	261.91969
145873	5926003	1	6	NO	4.82	12.7	3.06823930199319	6.49804395545132	5.53924231601751	1538280176.74891	FALSE	1.09000658988953	2.81488142406933	0.838769847946188	0.770	0.349058402990128	0.320	1.19806267689304	1538280176.21491	0.534003019332886	2.24	0.295567233083753	0.794288692485056	1.4874	0.454352890640943	6.88836853900584	74.87353040081000	5.59546	0.96905	81.43804	0.07926	0.07287	0.10468	97.09	42.6740	0.08801	10.84313	3.99206	0.42363	221.19990
148052	6018058	1	6	NO	4.51	5	2.30929038375683	2.96755713716544	4.22384393238212	1540521711.31676	FALSE	0.822761535644531	2.8067554008195	0.939537409099468	1.142	0.544348805567233	0.662	1.11485816020922	1540521710.72693	0.589828968048096	1.89	0.539930045536384	0.392236271855548	0.6650	0.414840885204799	4.9444555863528	98.6216759643952	16.32463	5.47986	120.42617	0.15216	0.12461	0.13346	62.39	7.7224	0.05570	9.34001	5.90324	0.36253	190.53620
135868	5510642	1	6	NO	4.93	10	1.95770202606451	2.08822007007214	6.84907375392032	1529122083.67934	FALSE	0.700006246566772	2.79669222334257	1.03576859686979	1.480	0.622003656814292	0.889	1.14237122307311	1529122083.16733	0.512004613876343	2.23	0.622727297249955	0.484161344420948	0.9456	0	8.25567005472869	115.086573203879	32.21491	11.61763	158.91911	0.06497	0.04705	0.12540	100.15	17.9885	0.06818	13.58102	7.79015	0.37851	277.05284
133415	5404235	1	6	NO	4.91	1.9	2.01438642434608	2.28159185718919	5.44607549898799	1527223323.10995	FALSE	0.722997188568115	2.78616079868242	1.0877370687997	1.504	0.355581946762962	0.492	0.615230532500093	1527223322.59796	0.511997938156128	1.20	0.387093051485789	0.410661705249493	0.8021	0	6.37646966293497	110.589264832872	32.24596	3.44593	146.28115	0.09769	0.07386	0.12019	29.05	12.9420	0.02443	9.22895	7.17064	0.26424	188.27061
145485	5910607	1	6	NO	4.44	3.31	3.06628940197822	6.56057413278672	5.23259350144729	1537901748.48655	FALSE	1.10099959373474	2.78500502582108	0.888939132093033	0.807	0.463444746211771	0.421	1.32326918873084	1537901747.93055	0.555999755859375	2.38	0.461593876131452	0.48486977987064	0.8721	0.416548075435429	6.09972079382842	72.56079501868450	6.09845	1.65757	80.31682	0.08848	0.07994	0.12290	104.93	14.0885	0.09197	9.77146	3.93710	0.45904	199.33774
145873	5926001	1	6	NO	4.82	12.7	2.84748320858448	6.25204570271775	6.49367340921214	1538279529.63608	FALSE	1.02400588989258	2.78072932655025	1.25554151369074	1.226	0.692726923060349	0.676	1.71300037338797	1538279529.00207	0.634003877639771	2.70	0.689425885923746	0.560355115113643	0.8838	0	6.0889940750588	77.77718208240180	15.12140	4.60314	97.50172	0.06487	0.05175	0.11774	118.60	12.6908	0.09816	11.21521	4.77950	0.44734	228.79023
145873	5926003	1	6	NO	4.82	12.7	3.13523833077115	6.8215104645135	6.53249728307142	1538280173.61189	FALSE	1.13500666618347	2.76230829666718	0.79602306856109	0.701	0.261603313340262	0.230	1.09630593476856	1538280173.12289	0.48900294303894	2.24	0.260702352968869	0.714774285062394	1.4617	0.514123641780443	7.10670869267047	69.24415312941440	4.46368	0.48209	74.18993	0.05406	0.05046	0.09930	105.87	45.0029	0.08700	11.03241	3.63676	0.43102	225.06124
131629	5330571	1	6	NO	4.94	7.4	1.80201248708167	1.59303312206133	5.15775994336377	1525751767.46145	TRUE	0.655977487564087	2.7470645277375	1.08434448753132	1.653	0.84260675949115	1.285	1.87098368335198	1525751766.36049	1.10096216201782	1.70	0.840667748210475	0.975089852191492	0.8857	1.26714020421842	8.4227715932581	118.491176488444	42.90471	25.90719	187.30308	0.12654	0.08005	0.13794	27.02	7.3385	0.04247	10.86569	9.18152	0.43722	221.66004
145293	5902853	1	6	NO	4.13	1.5	1.97425299049621	1.83660684040167	6.6944794940205	1537674704.08009	FALSE	0.723014354705811	2.73058616007634	0.847081320063786	1.172	0.636515269306451	0.880	1.12286161074854	1537674703.50208	0.578011512756348	1.94	0.632785797344158	0.779742326918778	1.3490	0.617152718539809	6.7065716927779	106.218967174633	19.55450	11.04115	136.81461	0.06047	0.04695	0.15889	67.25	32.4287	0.09254	11.59272	6.70660	0.49421	236.49148
134536	5451132	1	6	NO	4.98	34	1.88362016972368	1.99201717494935	4.8458254860183	1528150756.87707	FALSE	0.689994096755981	2.72990765947064	1.1774996826934	1.707	0.500101073546739	0.725	1.10282911007339	1528150755.56508	1.31198859214783	0.84	0.495070710144163	0.415276046026157	0.3165	0.341809614775071	7.02783758184418	111.246860519565	43.47331	7.84182	162.56199	0.13087	0.08956	0.12391	5.55	0.7865	0.00918	8.27920	7.96872	0.37353	168.89559
146057	5933580	1	6	NO	5.1	8.17	1.94024109262996	1.952886540295	6.73999288486751	1538447843.36062	FALSE	0.711008310317993	2.72885853016571	0.943247643202463	1.327	0.407599188653474	0.573	0.507295494192679	1538447841.6916	1.66902017593384	0.30	0.326569176720127	0.270506361786267	0.1621	1.52964625992451	5.29498914231114	107.875939460645	25.49557	4.76080	138.13230	0.05923	0.04626	0.10345	0.57	0.1621	0.00129	6.80709	6.77119	0.34813	138.86454
135335	5485492	1	6	NO	4.24	5	2.03146008211103	2.18130243955982	5.90962509573528	1528745475.70344	FALSE	0.744985818862915	2.72684396222694	1.01086601442925	1.357	0.381423584729218	0.512	0.728588615423325	1528745475.26945	0.433991670608521	1.68	0.434305556892861	0.390993372443005	0.9009	0.56020265574439	5.96769035024428	102.803947944314	25.45543	3.62417	131.88354	0.07708	0.06008	0.14973	66.89	19.2634	0.05698	10.68806	6.46488	0.39175	218.03637
145735	5920275	1	6	NO	5.22	6.7	1.99988193197828	2.03278726158555	7.88619201910694	1538190846.84643	FALSE	0.734009265899658	2.72460038978809	1.04325670987917	1.421	0.171308081920903	0.233	1.03741057187888	1538190846.06842	0.77800989151001	1.33	0.16916675586904	0.40224890466519	0.5170	0.139828880700469	8.87893657218093	104.169675476545	28.34751	0.76434	133.28153	0.04310	0.03368	0.09836	23.54	3.5389	0.02118	7.86075	6.53341	0.24379	160.35920
146057	5933538	1	6	NO	5.1	8.17	2.96780904086427	6.61496056594525	4.38150364710932	1538448767.40845	FALSE	1.08930706977844	2.72449259093481	0.979114467306836	0.899	0.352794578931534	0.324	1.08473910215008	1538448766.8638	0.544653654098511	1.99	0.414591217646661	0.399580883710018	0.7336	2.65875241524369	5.07523727129599	70.18724000345930	7.63929	0.99181	78.81835	0.12253	0.10911	0.09044	75.01	10.1785	0.04887	8.03962	3.86364	0.28228	164.00816
146255	5940316	1	6	NO	5.34	24.95	1.62905462945431	1.41322717712281	5.62979255605381	1538678647.10832	TRUE	0.60099458694458	2.71059784038376	0.929908001329184	1.547	0.489631094976104	0.815	1.09295139874921	1538678646.01833	1.08999061584473	1.00	0.486045111226316	0.480371273000343	0.4407	0.469719945629648	5.4438288017387	125.92061619616100	41.03038	11.37532	178.32631	0.09264	0.06542	0.10297	9.50	1.8354	0.01187	9.29719	8.74149	0.30814	189.66271
148052	6018063	1	6	NO	4.51	5	2.22630732890861	2.55340581714651	6.46078217517238	1540523005.47072	FALSE	0.82276177406311	2.70589543546033	1.14401459265628	1.390	0.690263183527437	0.839	1.91626250846023	1540523004.78192	0.68880033493042	2.78	0.685359905650149	0.718403550572212	1.0430	0	6.65521449139816	91.66111563048780	24.20349	8.81139	124.67600	0.06733	0.04950	0.13817	115.74	16.2665	0.12247	12.58226	6.11157	0.52260	256.67815
135868	5510708	1	6	NO	4.93	10	2.46591259923968	3.12074758706785	5.33172956167282	1529121283.66319	FALSE	0.911999225616455	2.7038538301092	0.787862303089851	0.864	0.511763194893859	0.561	0.920812131230086	1529121283.15219	0.51099967956543	1.80	0.510177896464778	0.439262266179826	0.8596	0	5.98419813532938	82.5675076154167	8.42858	3.55625	94.55234	0.08311	0.07257	0.09720	65.45	14.8944	0.04628	8.57343	4.63492	0.28054	174.89791
146255	5940336	1	6	NO	5.34	24.95	1.92357787206639	1.85672480997631	7.17763389328403	1538678114.08368	FALSE	0.711995124816895	2.70167281350568	1.11733712571584	1.569	0.729027939397105	1.024	1.55450381410225	1538678113.26069	0.822994470596313	1.89	0.724695969147626	0.718305503240243	0.8728	0.910539260673859	9.07698445347348	105.590709949119	35.62662	15.16682	156.38415	0.05921	0.03998	0.10698	44.65	9.5338	0.04284	10.32200	7.66589	0.31054	210.56881
145485	5910627	1	6	NO	4.44	3.31	1.74051658927402	1.72178600509551	4.40946425099855	1537902944.66151	TRUE	0.645005226135254	2.69845346789336	1.05442993955699	1.635	0.553365865404131	0.858	0.230894384137255	1537902944.38351	0.278002262115479	0.83	0.549985110948338	0.511615682684108	1.8403	0	4.92399614953531	116.279688102318	42.67593	11.75364	170.70925	0.15515	0.10568	0.15302	25.56	125.4816	0.05836	15.77198	8.36810	0.41273	321.74836
131567	5328504	1	6	NO	3.8	1.5	1.65658968988318	1.55860003167055	5.39904267061549	1525650646.97991	TRUE	0.623000621795654	2.6590498178131	0.328466695434363	0.527	0.618888345483705	0.993	0.474239597943663	1525650645.93391	1.04600119590759	0.45	0.61305952367406	0.430209024708403	0.4113	0.954427649228228	4.51214509366037	116.89654964757	4.59573	16.31535	137.80763	0.08069	0.06845	0.16289	2.02	1.6657	0.00732	6.93615	6.75528	0.44807	141.49746
148519	6037906	1	6	NO	5.34	24.95	2.00790433925334	2.2112770267328	6.38429316433861	1541094070.04678	FALSE	0.7559974193573	2.6559671869784	1.20464724601357	1.593	0.601955624922695	0.796	0.883861579377814	1541094069.50178	0.544998168945313	1.62	0.654930069032075	0.301277809050083	0.5528	0.0326600941662951	6.81903164342655	96.1086157599854	34.59362	8.63784	139.34008	0.07081	0.04884	0.10121	49.71	5.7755	0.02905	9.55014	6.83040	0.24352	194.82289
134536	5451134	1	6	NO	4.98	34	1.89037115534857	1.85123893032737	4.84898389523787	1528151665.15117	FALSE	0.711993932723999	2.65503829241388	0.920708928082762	1.293	0.643622018739675	0.904	0.552174647178343	1528151664.72817	0.422996282577515	1.31	0.641178515242138	0.277964236274489	0.6571	0	6.09830170108911	101.977065400417	24.19096	11.82143	137.98946	0.11448	0.08460	0.10854	41.49	10.5149	0.02430	9.31362	6.76419	0.23823	189.99790
146057	5933582	1	6	NO	5.1	8.17	3.30781780985567	8.07031540583859	6.33057827398529	1538449265.66769	FALSE	1.24601483345032	2.65471784207901	1.19333053424551	0.958	0.685435794965114	0.550	1.1627174854063	1538449265.22268	0.445005416870117	2.61	0.682706084931453	0.638321135527141	1.4344	0.563785065620316	6.78745904109413	58.25735320970110	7.58209	2.50150	68.34095	0.05821	0.04962	0.08970	158.01	47.6233	0.09639	13.43020	3.35005	0.48801	273.97616
145873	5925993	1	6	NO	4.82	12.7	3.21227557542179	7.22262751606754	5.83514138557155	1538280831.04094	FALSE	1.21199464797974	2.65040409277079	0.890141350790534	0.734	0.407007801186259	0.336	1.31370176884887	1538280830.45095	0.589997291564941	2.23	0.450940959398332	0.544567510445675	0.9230	0.486555315123443	5.96197765175624	59.69812756752690	4.58409	0.95839	65.24060	0.06362	0.05822	0.09325	86.55	14.8727	0.07057	8.16990	3.19807	0.35417	166.66605
134536	5451126	1	6	NO	4.98	34	2.34943838789724	3.76019819773551	5.92009081122217	1528149059.33882	FALSE	0.889992237091064	2.63984143904038	1.01722580015986	1.143	0.484685826488714	0.545	0.760662276202112	1528149058.94983	0.388996601104736	1.96	0.478059559830482	0.444592556328692	1.1429	0.649893226527914	6.28146943781729	80.6504305187394	15.11866	3.43241	99.20150	0.06902	0.05611	0.09753	101.25	34.5879	0.05837	11.52141	4.86282	0.33209	235.03673
145485	5910628	1	6	NO	4.44	3.31	2.81636479509179	5.23757166274028	5.90192371422067	1537903472.17676	FALSE	1.06800866127014	2.63702430253927	0.781642022788106	0.732	0.330720579294166	0.310	1.21377033813057	1537903471.58775	0.589004516601563	2.06	0.314055911563622	0.625636221321476	1.0622	0.0809485144987132	7.52425768952035	67.06419476814090	5.16569	0.92477	73.15466	0.06145	0.05634	0.10858	74.26	19.7299	0.07694	8.19336	3.58601	0.38491	167.14448
145485	5910624	1	6	NO	4.44	3.31	2.69918473507968	4.82509753646776	6.00372678442505	1537902234.2538	FALSE	1.03400826454163	2.61040924685086	0.689768207579825	0.667	0.493596743384533	0.477	1.15640798554134	1537902233.64179	0.612004995346069	1.89	0.222996357084198	0.85263752157973	1.3932	0.00450590235645709	6.29768655870272	67.87821499895980	4.43273	2.26992	74.58086	0.05862	0.05335	0.10717	60.09	32.6664	0.07889	8.20275	3.65592	0.38279	167.33619
145485	5910622	1	6	NO	4.44	3.31	1.38572572416802	1.18102819873164	5.61526889326847	1537901060.55935	TRUE	0.534004211425781	2.59497152741204	0.471862825740293	0.884	0.355694523521714	0.666	0.514392519483412	1537901060.25835	0.301002502441406	1.71	0.354486995686462	0.256267914874369	0.8514	0	5.28192607609205	129.884622565108	15.06034	8.55771	153.50267	0.07122	0.06027	0.11392	99.93	24.8036	0.05218	13.63926	7.52464	0.32289	278.24098
148052	6018093	1	6	NO	4.51	5	2.16109820634653	2.29978946914498	6.41052187378521	1540524613.5713	FALSE	0.834007263183594	2.59122228515988	1.10608518666082	1.326	0.798469871956043	0.957	0.4112284414523	1540524612.43729	1.13401007652283	0.36	0.796388615166068	0.567274943142647	0.5002	1.05904657005959	5.56066371963648	82.9233296199729	21.72225	11.31996	115.96554	0.06448	0.04611	0.13027	1.19	2.2729	0.00530	5.85455	5.68459	0.31660	119.43281
145485	5910627	1	6	NO	4.44	3.31	1.8407034645049	1.72985533964659	4.37514706081128	1537902941.63649	TRUE	0.711005687713623	2.5888730516686	1.18947199328016	1.673	0.891594404983362	1.254	1.67229426354661	1537902940.90248	0.734005928039551	2.28	0.885672863865524	0.712568662534923	0.9708	2.38308040339001	5.12220442359817	97.0924945788348	40.54399	22.77994	160.41643	0.16325	0.09881	0.15851	72.84	13.2249	0.08779	12.08237	7.86355	0.49499	246.48030
145873	5926017	1	6	NO	4.82	12.7	2.81750339292798	5.16404720259459	5.23655019915312	1538279003.49506	FALSE	1.09000253677368	2.58485948231604	0.606226179468763	0.556	0.366086134482802	0.336	0.968406044544139	1538279003.02806	0.46700119972229	2.07	0.340333871854156	0.524473449969995	1.1231	0	5.83223941676883	63.13694938718880	2.92297	1.06591	67.12583	0.07310	0.06876	0.08628	94.84	27.8183	0.06755	9.30321	3.29048	0.34847	189.78557
131061	5307665	1	6	NO	4.39	22.7	2.27004600695673	2.46243611998124	6.10689613726529	1525195669.04807	FALSE	0.878986358642578	2.58257251052493	0.678828707434387	0.772	0.482989239591903	0.549	0.963015136897515	1525195668.53608	0.511992216110229	1.88	0.482372311568008	0.534693584714397	1.0443	0.293277240034453	6.2714192492688	78.1556064862215	6.98894	3.53806	88.68261	0.05726	0.05047	0.11082	71.17	21.9410	0.06777	8.91158	4.34719	0.35949	181.79633
135868	5510706	1	6	NO	4.93	10	1.83851842071649	1.65451695898726	4.53292276285981	1529120808.21652	FALSE	0.711999654769897	2.58219004517728	0.509995998109425	0.716	0.217304177782414	0.305	1.29319335946168	1529120807.44852	0.767999410629272	1.68	0.230870533412316	0.575641940100948	0.7495	0	5.14634920488553	96.4570213803619	7.42218	1.34752	105.22672	0.09990	0.09157	0.08445	38.03	7.5346	0.03944	7.39154	5.15817	0.25156	150.78738
145293	5902840	1	6	NO	4.13	1.5	2.0917828503321	2.31840339847773	5.12992514386887	1537675037.33385	FALSE	0.811995506286621	2.57610151058365	0.995672745085488	1.226	0.598719453171501	0.737	1.3750634799579	1537675036.43286	0.900995254516602	1.53	0.596036454112919	0.585563699324849	0.6499	0.628037150029858	5.09743667366313	84.1801205757354	19.07259	6.89641	110.14912	0.09312	0.07116	0.14366	26.63	4.8286	0.04552	6.94138	5.39947	0.38962	141.60425
145485	5910585	1	6	NO	4.44	3.31	3.30795484838592	7.62276463263047	5.41497741433983	1537903787.36873	FALSE	1.28999876976013	2.56430852953528	0.739995129864066	0.574	0.380545822952622	0.295	0.804110084288696	1537903787.02373	0.344999551773071	2.33	0.378737170673306	0.386905120765635	1.1215	0	5.53954518325994	52.50352744868290	2.62741	0.69484	55.82577	0.06729	0.06328	0.10008	162.19	37.5483	0.09577	12.52744	2.73656	0.58070	255.55983
146057	5933582	1	6	NO	5.1	8.17	2.3367388279495	2.31235278601119	5.96616942293588	1538449270.22774	FALSE	0.91201114654541	2.56218231191668	0.876855898523217	0.961	0.792574062448768	0.869	1.33120854350275	1538449269.66073	0.567006587982178	2.35	0.791512493365982	1.02496549252322	1.8077	0	7.57158748201837	74.1407774575592	10.43983	8.52936	93.10996	0.06536	0.05204	0.08945	100.13	59.3597	0.09526	12.38234	4.56421	0.39353	252.59983
133839	5422022	1	6	NO	4.01	3	2.10395610807094	2.4231560667037	5.06452714329032	1527470524.14703	FALSE	0.823008298873901	2.5564214977537	1.02216191778908	1.242	0.37882670128142	0.460	1.52344388530543	1527470523.13502	1.01201033592224	1.51	0.376189456928165	0.582472940868395	0.5756	0	8.6589036282715	81.7895713762899	19.30474	2.65159	103.74590	0.09120	0.07190	0.14548	23.06	3.3716	0.04558	6.38145	5.08558	0.40701	130.18152
148052	6018094	1	6	NO	4.51	5	2.13202690021916	2.15892229693465	5.58995752161155	1540525073.92537	FALSE	0.834007501602173	2.55636417672913	0.883678267723264	1.060	0.644012979025175	0.772	0.124501826414497	1540525073.46936	0.456003904342651	0.27	0.322255181642786	0.187957200479875	0.4122	0.645131800498719	6.18380508861867	80.7072805131275	13.86487	7.36405	101.93620	0.07454	0.05902	0.11451	1.68	3.8375	0.00339	5.26752	4.99687	0.18672	107.45748
145485	5910561	1	6	NO	4.44	3.31	1.36269614963461	1.14884817803104	6.34566389749174	1537905474.57225	TRUE	0.533985137939453	2.5519364731629	0.900668418924631	1.687	0.455473298912999	0.853	0.953702086750712	1537905474.11626	0.455987215042114	2.09	0.462856372564235	0.252521769486686	0.5538	0	6.70530421694794	125.616813640822	54.87564	14.03381	194.52626	0.07067	0.04564	0.14436	98.81	6.9275	0.06701	14.71885	9.53560	0.41311	300.26463
148052	6018071	1	6	NO	4.51	5	2.23973471360666	2.41801956921317	4.98631648165443	1540525619.17629	FALSE	0.877745628356934	2.55168996717108	0.515714703077278	0.588	0.2575408396574	0.293	2.15343962170789	1540525618.4535	0.722790718078613	2.98	0.165187034496293	0.748344416787337	1.0354	0.597262066566366	4.5846552451382	76.4054541834895	4.05089	1.01024	81.46658	0.07879	0.07390	0.09632	126.49	15.2758	0.13802	10.94289	3.99346	0.48126	223.23487
145485	5910561	1	6	NO	4.44	3.31	1.61439622954839	1.44630279254172	6.4076258153614	1537905475.95121	TRUE	0.633982419967651	2.5464369021948	0.559907266073682	0.883	0.550772466934768	0.869	0.521908911491198	1537905475.57322	0.377989292144775	1.38	0.0276774764698668	0.384046719938387	1.0160	0.161677364236821	6.68613567112557	105.347891572546	12.67178	12.26168	130.28136	0.05512	0.04457	0.11479	51.95	28.1298	0.04207	10.31184	6.38634	0.29585	210.36148
148052	6018082	1	6	NO	4.51	5	1.35281489397411	0.979676456302372	0.830402310712296	1540525215.44451	TRUE	0.532994747161865	2.538139261555	1.42098789851526	2.666	1.07152909058579	2.010	0.1670099809657	1540525215.15451	0.289997100830078	0.58	1.06966994131986	1.60182558762183	5.5236	0	2.02330048776256	124.493073781893	137.35649	78.10456	339.95412			0.24406	11.78	1083.6442	0.42789	70.36168	16.66442	1.59117	1435.37821
135868	5510677	1	6	NO	4.93	10	2.03291466455663	2.24180611341227	4.20116433455192	1529121924.48951	FALSE	0.801013231277466	2.53792894446264	1.23865995698095	1.546	0.671309499527578	0.838	1.4715608933498	1529121923.8225	0.667011260986328	2.21	0.666814073309031	0.645483733796928	0.9677	0	6.3830948956956	82.824047942067	30.74839	9.03158	122.60402	0.15244	0.10298	0.11070	75.16	14.4613	0.06739	10.40327	6.01000	0.35119	212.22664
133413	5404159	1	6	NO	4.19	0.5	2.08423131221515	1.98130070490619	4.79545570567765	1527284534.27567	FALSE	0.822997331619263	2.53248854174823	0.635439162864953	0.772	0.505922763699459	0.615	1.39585265381424	1527284532.98568	1.28999590873718	1.08	0.505085111898238	0.713950603034671	0.5535	0.703729806665465	4.76654632171287	80.2663982823786	7.46088	4.72945	92.45672	0.09065	0.07870	0.11875	9.35	2.4457	0.02374	5.11035	4.53219	0.34376	104.25116
145485	5910624	1	6	NO	4.44	3.31	2.95410751749942	5.81597301991828	6.15263678446974	1537902237.47882	FALSE	1.16800951957703	2.52918102805291	0.814134804069063	0.697	0.450469826705331	0.386	0.869952146860887	1537902237.02282	0.456003665924072	1.91	0.223633827019489	0.634210690543347	1.3908	0	5.863119295569	56.40929515051040	4.28441	1.31168	62.00539	0.05242	0.04768	0.10065	82.21	43.6917	0.07979	9.21112	3.03948	0.42410	187.90681
146057	5933580	1	6	NO	5.1	8.17	1.39531940364506	1.20401509272925	6.63620574662683	1538447839.31157	TRUE	0.556006669998169	2.50953716733228	0.429947011994802	0.773	0.597549181861394	1.075	0.575321583079325	1538447838.78857	0.523006200790405	1.10	0.238460333191354	0.361997931318441	0.6921	0	7.1787640440922	116.6660482341	11.07713	21.39659	149.13976	0.05159	0.04035	0.08735	23.83	9.4347	0.01833	8.94143	7.31077	0.20732	182.40525
148519	6037906	1	6	NO	5.34	24.95	2.34295479956205	3.06524771948312	7.75134830744847	1541094066.4658	FALSE	0.933996677398682	2.50852583982153	1.32488607547644	1.419	0.646745777079262	0.692	1.89541277957531	1541094065.3088	1.15699625015259	1.64	0.641864887869397	0.506360132550079	0.4377	0.862395701332616	9.27180690265939	69.3951392180084	22.19005	5.28772	96.87291	0.04126	0.02955	0.08693	23.89	1.7051	0.02845	6.00342	4.74867	0.24604	122.46986
134536	5451126	1	6	NO	4.98	34	1.95052396789076	1.74112218131961	5.61671242942677	1528149062.5088	FALSE	0.777993440628052	2.50712135351187	0.917552355711896	1.179	0.61460950794545	0.790	2.6851945634135	1528149060.22882	2.27998018264771	1.18	0.609986556122056	0.761318142842686	0.3339	2.65472126944325	4.84244736011385	83.2169895988556	18.41497	8.26243	109.89440	0.07425	0.05623	0.09445	6.27	0.5037	0.01705	5.71883	5.38698	0.39411	116.66418
131062	5307692	1	6	NO	4.41	5	2.48059348889794	3.26287966424724	5.19299525332003	1525056109.76997	FALSE	0.989989519119263	2.50567651575219	0.690970906296259	0.698	0.463951427592623	0.469	1.08896988187134	1525056109.22497	0.544994354248047	2.00	0.46243943418374	0.561423890373159	1.0301	0.442859891028144	5.83216118239342	65.3215728121335	5.06833	2.28502	72.67493	0.07309	0.06570	0.10135	75.46	20.0559	0.07333	8.24445	3.56250	0.36369	168.18672
149002	6057074	1	6	NO	4.81	10.4	2.17216537862064	2.18956795511755	5.39829930367189	1541735895.24813	FALSE	0.867004632949829	2.50536767171616	0.709305611304337	0.818	0.292851905394195	0.338	1.05533627137284	1541735894.56913	0.679003477096558	1.55	0.248850872656308	0.732563259964107	1.0789	0.344776516107949	7.53019442157153	74.5690731040071	7.95133	1.35540	83.87581	0.06837	0.06078	0.08611	36.64	17.6568	0.04366	6.77336	4.11156	0.25297	138.17659
148052	6018094	1	6	NO	4.51	5	2.30520763302013	2.89731770636896	6.50846278220806	1540525070.82234	FALSE	0.92300820350647	2.49749419806102	0.660072138149589	0.715	0.594789048876836	0.644	0.452990771531604	1540525070.41133	0.411003589630127	1.10	0.465040665149845	0.306027616233431	0.7446	0	6.4180505125047	69.60503236073220	5.70694	4.63390	79.94587	0.04773	0.04155	0.09939	30.44	13.8938	0.02454	6.09226	3.91892	0.22332	124.28210
146057	5933572	1	6	NO	5.1	8.17	2.80426768807886	6.59299681474812	6.41188394538298	1538447157.33691	FALSE	1.12300992012024	2.49709965854853	1.26411984425054	1.126	0.771539452549572	0.687	1.21254662214039	1538447156.6469	0.690006017684937	1.76	0.767739942013994	0.383487248740504	0.5558	0	7.66382324526249	57.19069609979240	11.62152	4.32915	73.14137	0.05474	0.04280	0.08652	46.10	4.6108	0.03686	6.07105	3.58536	0.23652	123.84951
133413	5404163	1	6	NO	4.19	0.5	1.88740546626779	1.65790235558703	5.19690389844869	1527285669.23513	FALSE	0.755997657775879	2.49657581191518	0.903163439645896	1.195	0.390195575609404	0.516	1.20053450668744	1527285668.76713	0.467998504638672	2.57	0.379781377241388	0.601435632167202	1.2851	0	6.53140765933795	84.9192777536668	19.44503	3.62945	107.99375	0.08282	0.06512	0.12741	144.83	36.3481	0.13232	14.17500	5.29381	0.55235	289.17009
145485	5910611	1	6	NO	4.44	3.31	2.27167047919776	2.58967001895336	5.21419559452546	1537903115.35995	FALSE	0.911999702453613	2.4908675661693	0.617867832134565	0.677	0.224459481198134	0.246	0.68518864187409	1537903115.00395	0.355999708175659	1.92	0.303837856408519	0.344999351649503	0.9691	0	5.16981340265883	70.0718854618819	5.18375	0.68411	75.93975	0.06979	0.06440	0.09625	107.18	27.1722	0.06647	10.30837	3.72254	0.37058	210.29069
148519	6037899	1	6	NO	5.34	24.95	3.08888128417383	6.69936111878281	7.13359777155913	1541096377.81573	FALSE	1.24599170684814	2.47905444891561	0.845747949999289	0.679	0.305774933044393	0.245	1.10819369829428	1541096377.25973	0.555996417999268	1.99	0.303983175558935	0.568530373041274	1.0225	0.597501312452447	8.05797619485363	50.80356678714580	3.80867	0.49785	55.11009	0.03697	0.03408	0.06597	73.60	19.3700	0.04966	7.25862	2.70147	0.25637	148.07577
135867	5510552	1	6	NO	5.22	16	2.24499564709099	2.7872466117167	6.30138781740132	1529170752.52088	FALSE	0.911990404129028	2.46164393498747	0.990063983016162	1.086	0.460240198565547	0.505	0.9175522780063	1529170751.98688	0.533994197845459	1.72	0.458743459182888	0.670917826883769	1.2564	0	7.57086499585805	68.4380182103031	13.31046	2.87631	84.62478	0.05325	0.04306	0.07760	56.95	30.4485	0.04692	8.43249	4.14827	0.25010	172.02272
149002	6057073	1	6	NO	4.81	10.4	2.40249407951986	3.77884502579114	7.64838189925898	1541733858.71244	FALSE	0.978005170822144	2.45652492563024	1.08568029247237	1.110	0.435386868753233	0.445	0.948066707209996	1541733858.17844	0.534002780914307	1.78	0.432509413020717	0.320155778634059	0.5995	0.00287963507987943	7.45392926117217	63.5533465157954	12.97830	2.08720	78.61884	0.03601	0.02911	0.09105	60.80	6.9331	0.04283	7.17399	3.85386	0.26204	146.34930
135868	5510721	1	6	NO	4.93	10	2.67692666666939	4.25277418362868	6.0756135470601	1529120323.74681	FALSE	1.09000086784363	2.45589406911685	0.566746441175115	0.520	0.313765328604518	0.288	1.61401345190082	1529120322.93481	0.812000513076782	1.99	0.312814245202878	0.88195901022738	1.0862	0.541198498547664	5.86334267205049	56.99406608157150	2.55467	0.78301	60.33174	0.04881	0.04611	0.07413	50.12	14.9646	0.05957	6.14770	2.95744	0.26889	125.41306
148519	6037894	1	6	NO	5.34	24.95	3.26812259035017	7.09991631265109	4.75868517415389	1541097056.81347	FALSE	1.33290648460388	2.45187687816029	1.00493767002691	0.754	0.631336624499004	0.474	2.55832582659534	1541097055.54746	1.2660117149353	2.02	0.629612666068281	0.981446825498869	0.7752	0	6.83902200440245	46.45525626853670	4.39255	1.73364	52.58145	0.08479	0.07491	0.06734	33.22	4.8894	0.04636	4.44577	2.57752	0.22646	90.69364
134536	5451087	1	6	NO	4.98	34	1.33276078286247	1.09035621220988	4.92900510543419	1528151774.47197	TRUE	0.54499077796936	2.44547400935544	0.591555237931776	1.085	0.285461037730217	0.524	0.322073432624828	1528151774.20597	0.265995502471924	1.21	0.282671086337423	0.233068509495713	0.8762	0	4.8599251271237	113.02491112413400	22.26693	5.18518	140.47702	0.08633	0.06946	0.08458	56.77	29.7291	0.02542	11.12631	6.88613	0.20335	226.97679
135868	5510736	1	6	NO	4.93	10	2.27800452525179	2.1867014626743	5.19212470101297	1529120164.52172	FALSE	0.934003591537476	2.43896762913078	0.673282863022734	0.721	0.692055172644205	0.741	1.7854230481259	1529120163.98772	0.534002065658569	3.34	0.689694054904842	0.824425355120706	1.5439	0	5.82649308805366	65.5995334958025	5.73042	6.05443	77.38438	0.07345	0.06227	0.08147	215.62	45.9739	0.15747	16.61662	3.79335	0.56094	338.97907
133415	5404237	1	6	NO	4.91	1.9	1.84303770638359	1.6400954920977	4.05262565549536	1527224382.24885	FALSE	0.755996942520142	2.43789042352441	0.465261449731025	0.615	0.303562551911016	0.402	0.878737389981117	1527224381.80385	0.444998264312744	1.97	0.327028658563957	0.511734719434809	1.1500	0.60438959199908	5.55087991481444	80.9739916171988	5.16026	2.19671	88.33096	0.11140	0.10212	0.07589	90.26	30.6092	0.06112	10.25476	4.32995	0.28552	209.19708
145485	5910618	1	6	NO	4.44	3.31	2.22270456844961	2.15254701216573	4.93760181505564	1537901221.18491	FALSE	0.911999940872192	2.43717621990625	0.628891628051352	0.690	0.415779815848947	0.456	1.11737444301853	1537901220.61791	0.566999673843384	1.97	0.419117223390205	0.418980315734939	0.7389	0	5.29422455931876	67.0835872953219	5.37037	2.34736	74.80132	0.07666	0.06875	0.09481	70.55	9.9192	0.06341	7.61121	3.66673	0.31915	155.26876
131567	5328485	1	6	NO	3.8	1.5	1.37742000894721	1.19625034500146	5.52544950804647	1525651413.06148	TRUE	0.567000150680542	2.42931153950129	0.416765833138339	0.735	0.620423112466003	1.094	0.915089450414008	1525651412.21648	0.845000267028809	1.08	0.618015371460592	0.407289059387175	0.4820	0.447011874486005	5.06496122139878	107.206341750296	9.81458	21.75022	138.77115	0.07061	0.05455	0.14929	14.30	2.8319	0.02746	7.64207	6.80251	0.41765	155.89832
145873	5926001	1	6	NO	4.82	12.7	1.89101875095445	1.71873471263095	5.70987155246182	1538279527.26706	FALSE	0.779004573822021	2.42748093464531	0.605762606481574	0.778	0.292365295805909	0.375	0.914609042601598	1538279526.88906	0.378002405166626	2.42	0.290400603962756	0.555101131094696	1.4685	0.842617530557387	6.32765355943718	77.9128108186839	7.99507	1.86238	87.77026	0.05746	0.05100	0.08063	159.52	58.7622	0.09730	15.00274	4.30246	0.41759	306.05587
145485	5910630	1	6	NO	4.44	3.31	1.51106649094261	1.22496795120645	4.46509702760685	1537906023.62029	TRUE	0.623004913330078	2.42544875427334	0.752112367746138	1.207	0.648645937033692	1.041	1.33157298141967	1537906023.00829	0.612004995346069	2.18	0.644344979052887	0.521882291630503	0.8527	0	5.38294191092081	97.2590356792896	24.09507	17.92166	139.27577	0.11924	0.08327	0.12059	79.67	12.2382	0.07817	11.33261	6.82724	0.39680	231.18533
131061	5307685	1	6	NO	4.39	22.7	2.47802622584164	3.75838444321991	7.19789841676181	1525194351.97266	FALSE	1.02300572395325	2.42229947283744	0.942742973250361	0.922	0.457495429006708	0.447	0.780005759211043	1525194351.59366	0.379002332687378	2.06	0.456030177765575	0.576985846406523	1.5224	0	7.56148886195577	59.07650990296880	8.55046	2.01362	69.64059	0.03767	0.03196	0.10128	115.11	62.9857	0.09596	12.14386	3.41375	0.49376	247.73473
135867	5510555	1	6	NO	5.22	16	1.7989056872257	1.55256934809769	8.82434220451198	1529172492.54458	TRUE	0.744992017745972	2.4146643781076	0.852291062456448	1.144	0.479834982163806	0.644	0.398908103065363	1529172492.21058	0.333996534347534	1.19	0.269958510150489	0.200993260002536	0.6018	0	9.12649900707858	80.6118996930862	18.09499	5.73543	104.44232	0.02738	0.02113	0.07823	43.99	11.1680	0.01852	7.82356	5.11972	0.17315	159.60060
135868	5510736	1	6	NO	4.93	10	2.65834431231636	4.37220602682354	6.42810633068413	1529120150.59667	FALSE	1.10100412368774	2.41447262105832	0.800922418578426	0.727	0.245229335902838	0.223	0.811753085278277	1529120150.02966	0.567002296447754	1.43	0.30541861717102	0.375883172747543	0.6629	0	5.85421052128841	54.53720153984110	4.95053	0.46410	59.95183	0.04377	0.03981	0.07441	37.23	7.9834	0.02890	5.15532	2.93882	0.19774	105.16847
131062	5307694	1	6	NO	4.41	5	2.65570483797924	3.8740193895883	5.0426696745808	1525054877.2321	FALSE	1.10099339485168	2.41209879223390	0.980851883910064	0.891	0.81857832087267	0.743	0.75803342483839	1525054876.8651	0.366997718811035	2.07	0.678689700712881	0.706706174508452	1.9256	0.373092116891145	5.19923752783792	54.43054635044780	7.42489	5.17135	67.02678	0.07951	0.06457	0.10396	119.74	104.0698	0.11571	14.25649	3.28563	0.60145	290.83238
135868	5510723	1	6	NO	4.93	10	1.96905011597882	1.68381446915923	4.82968346351066	1529120942.27731	FALSE	0.82300066947937	2.39252553369664	0.498910976624455	0.606	0.533751271082631	0.649	1.73834916529537	1529120941.24331	1.03400087356567	1.68	0.536758098449249	0.589277397028062	0.5699	0.930279825083462	5.43607768779974	71.63911283330850	4.59921	5.26398	81.50230	0.07878	0.06925	0.07561	28.15	3.2353	0.03659	5.53393	3.99521	0.23631	112.89214
146255	5940316	1	6	NO	5.34	24.95	1.72909338399191	1.69605258780496	6.98501142561097	1538678635.13043	TRUE	0.722993850708008	2.3915741223783	1.21534431061299	1.681	0.567379013649895	0.785	1.39227220624894	1538678634.17344	0.95699143409729	1.45	0.56399463668762	0.519966597639556	0.5433	0.495457929734387	8.52970524668495	81.483619543172	40.25614	8.77364	130.51340	0.05299	0.03308	0.09066	22.78	3.1773	0.02387	7.67015	6.39772	0.25256	156.47114
145293	5902852	1	6	NO	4.13	1.5	2.39508593495333	2.5692536203253	5.49551524626572	1537674518.61338	FALSE	1.00202012062073	2.39025732683853	0.817303818140957	0.816	0.603548809215323	0.602	1.18911765642683	1537674517.95737	0.656013011932373	1.81	0.599943983062981	0.543212159922523	0.8281	1.08483746396158	5.23961633590666	58.72866093262650	6.83872	3.72935	69.29673	0.06299	0.05338	0.11153	51.59	10.7656	0.06570	6.45345	3.39690	0.35061	131.65044
146255	5940329	1	6	NO	5.34	24.95	2.67412562731463	3.57967664587113	5.09830716534646	1538681910.25686	FALSE	1.12299036979675	2.38125428252659	0.835062918824374	0.744	0.400937836376301	0.357	0.759057492661848	1538681909.77886	0.477995634078979	1.59	0.400282360827082	0.536152959674797	1.1217	0.232966314973337	5.99410642892006	52.00830990073250	5.07163	1.16913	58.24907	0.06895	0.06156	0.06285	54.34	27.1108	0.03741	6.84800	2.85535	0.21489	139.69930
134536	5451189	1	6	NO	4.98	34	2.62135125482139	4.51722286433795	5.23797858155938	1528148295.80945	FALSE	1.10100531578064	2.38087066179402	1.0094635166115	0.917	0.683195554108507	0.621	1.90336304227086	1528148294.51945	1.29000616073608	1.48	0.679074238333384	0.678161766196472	0.5257	0.0217779451799718	6.74683443602494	53.02972999088130	7.86412	3.60213	64.49598	0.07091	0.05830	0.07845	17.38	2.2066	0.02792	4.12180	3.16157	0.22210	84.08482
134536	5451132	1	6	NO	4.98	34	2.32881313830689	3.096013806747	4.32920909123292	1528150761.78102	FALSE	0.978991508483887	2.37878788337337	1.32622994396697	1.355	1.00268565987654	1.024	2.20534881519854	1528150760.09104	1.68998527526855	1.30	0.991462481002279	0.645869560390496	0.3822	1.17470334951002	5.30001501389719	59.534640468257	19.30804	11.03647	89.87914	0.12863	0.08520	0.09720	10.38	0.8902	0.02104	4.95824	4.40584	0.29823	101.14803
146057	5933536	1	6	NO	5.1	8.17	2.61540082028769	3.50431270039612	6.23730699144367	1538448145.93582	FALSE	1.10030007362366	2.37698868061900	0.593474215359647	0.539	0.295861989477843	0.269	0.860850409085468	1538448145.52409	0.411738157272339	2.09	0.27688867519246	0.530896007769095	1.2894	0.313097362734762	6.65354546446308	52.89082117625190	2.72338	0.67683	56.29103	0.04362	0.04098	0.06524	109.35	41.5904	0.06546	10.15853	2.75936	0.33006	207.23404
135868	5510675	1	6	NO	4.93	10	2.26386081581187	2.69955039157417	6.83861933014483	1529121698.02473	FALSE	0.956015825271606	2.36801604740037	0.892909419106055	0.934	0.402066430486744	0.421	0.992237721548159	1529121697.41272	0.61201024055481	1.62	0.355683974024736	0.538453814981847	0.8798	0	7.89469070650017	60.4145334009209	9.39846	1.90563	71.71862	0.04017	0.03384	0.07729	44.24	13.0274	0.03951	6.32273	3.51562	0.22798	128.98374
145485	5910611	1	6	NO	4.44	3.31	2.75447654135925	4.39982138164781	5.01910020784769	1537903119.18495	FALSE	1.1679995059967	2.35828570750015	0.726074244809699	0.622	0.287701022692126	0.246	0.918286815647077	1537903118.70695	0.477999687194824	1.92	0.365667725661245	0.372574414963106	0.7794	0	5.78273810397705	49.0441716210936	3.40778	0.53505	52.98700	0.06731	0.06230	0.08601	79.53	13.0912	0.06153	7.13748	2.59740	0.33308	145.60458
146057	5933536	1	6	NO	5.1	8.17	2.76605996590724	4.07329299230381	5.07083294679413	1538448142.12325	FALSE	1.17825055122375	2.34759912739643	0.840798481501945	0.714	0.461603809639638	0.392	0.946487138656942	1538448141.62357	0.499681949615479	1.89	0.261840095136319	0.493810569420679	0.9882	0	6.31486147607401	48.17785408158980	4.45152	1.34172	53.97110	0.06776	0.06048	0.06698	73.96	20.1315	0.04952	7.25788	2.64564	0.26169	148.06072
146057	5933583	1	6	NO	5.1	8.17	2.78988796654102	4.30000994418366	6.27381984669174	1538449715.02708	FALSE	1.19001412391663	2.34441584387151	0.88780790833628	0.746	0.839764749188484	0.706	0.722963001421081	1538449714.55907	0.468005657196045	1.54	0.0922172705787141	0.982391713145767	2.0991	0	6.13337205959991	47.57232796391790	4.81747	4.31019	56.69998	0.04697	0.03940	0.07107	52.52	96.9736	0.07369	10.10747	2.77941	0.36011	206.19249
145485	5910588	1	6	NO	4.44	3.31	2.96225029057532	5.59843254469735	5.58510321073342	1537905212.20324	FALSE	1.26799869537354	2.33616193879653	0.800796838125634	0.632	0.487357315059587	0.384	1.16772300932203	1537905211.68024	0.522999286651611	2.23	0.484736900265802	0.5727964893018	1.0952	0.557341233282699	5.79115808627357	44.33271266697960	3.23985	1.19998	48.77255	0.05432	0.04937	0.08595	98.18	23.6230	0.08853	8.36144	2.39081	0.42457	170.57340
148052	6018082	1	6	NO	4.51	5	1.99334499166271	1.89326575031457	8.20427789144671	1540525210.71756	FALSE	0.85599160194397	2.32869690209085	0.814196256001499	0.951	0.599744072701891	0.701	0.77190210747128	1540525209.92756	0.789992094039917	0.98	0.309812625965847	0.203256219051364	0.2573	1.13841718895671	6.58664870143179	65.25197358218190	10.88647	5.90691	82.04535	0.02859	0.02273	0.09460	12.45	0.8631	0.01416	4.67433	4.02183	0.21141	95.35627
148519	6037892	1	6	NO	5.34	24.95	1.90499857738538	1.57966296626985	6.15600927542881	1541095628.68738	FALSE	0.821709394454956	2.31833612982966	0.537139464433703	0.654	0.680210093526173	0.828	1.45794866406164	1541095627.95453	0.73284912109375	1.99	0.678010844638705	0.774182651565074	1.0564	0.407282970835701	6.71298118015404	67.3708116343464	5.35620	8.58951	81.31652	0.04831	0.04002	0.06420	55.63	15.6849	0.05021	7.48173	3.98610	0.22796	152.62739
135335	5485525	1	6	NO	4.24	5	2.65167034351791	3.57935976399157	5.41718233778307	1528745204.93399	FALSE	1.14598917961121	2.31387031456747	0.985884877910115	0.860	0.426863045587682	0.372	1.22560283624591	1528745204.45599	0.477995634078979	2.56	0.435176823894866	0.419740067775952	0.8781	0	7.05054821610606	48.12101026544210	6.65194	1.24702	56.01996	0.05994	0.05148	0.09784	141.67	16.6160	0.11530	10.50499	2.74608	0.53038	214.30174
146057	5933498	1	6	NO	5.1	8.17	1.92790746720967	1.77017170624275	6.80135395153342	1538450117.53089	FALSE	0.835040330886841	2.30875970405186	1.23927610642091	1.484	0.494780051865093	0.593	1.69335245549414	1538450116.78586	0.745036125183105	2.27	0.493791711058499	0.697225150835795	0.9358	0.393051051148891	6.38904467759414	65.7487106802899	27.16758	4.33051	97.24681	0.04809	0.03252	0.08554	71.42	12.1074	0.06555	8.86132	4.76700	0.30087	180.77095
145293	5902858	1	6	NO	4.13	1.5	1.45501474895296	1.20638959410436	7.71855539406386	1537675603.29608	TRUE	0.634012699127197	2.29492997688529	0.783990361893394	1.237	0.552111728990604	0.871	0.490377147057847	1537675602.90708	0.389007806777954	1.26	0.305365653340372	0.385551797593932	0.9911	0.709814983916611	7.16102068727273	85.5614519115902	24.84076	12.31962	122.72183	0.03578	0.02495	0.12498	42.07	26.0092	0.04254	9.35323	6.01578	0.31353	190.80594
131061	5307666	1	6	NO	4.39	22.7	2.72621886509382	4.10506575809094	5.38544093597084	1525195726.29719	FALSE	1.18998146057129	2.29097591468779	1.39703600699485	1.174	1.03772510360915	0.872	1.87343534278441	1525195725.6302	0.666989803314209	2.81	1.03366723970742	0.547341429868165	0.8206	0	5.82672104054309	45.42951247605660	11.92976	6.58235	63.94163	0.07188	0.05107	0.10817	121.83	10.3991	0.12538	9.61625	3.13439	0.51787	196.17153
146057	5933547	1	6	NO	5.1	8.17	2.31831192821916	2.58720693375037	5.37755538011696	1538447073.66904	FALSE	1.0119960308075	2.29083104838792	1.14479498057801	1.131	0.71520914399469	0.707	1.71689315309725	1538447072.80104	0.867996215820313	1.98	0.712743154927856	0.693002293812451	0.7984	0.0382591470081994	7.64364836248161	53.4127005884871	13.02436	5.08355	71.52060	0.06857	0.05121	0.07624	46.43	7.5640	0.04936	6.15253	3.50591	0.24855	125.51159
148519	6037910	1	6	NO	5.34	24.95	2.82757173251625	5.78410052701464	6.4350494415118	1541097277.78185	FALSE	1.2349956035614	2.28953991768253	1.91998213199485	1.555	1.35769643164764	1.099	1.96115757132592	1541097276.91486	0.866997003555298	2.26	1.33125701937072	0.407728560143144	0.4703	1.00156907754225	8.14807604485375	43.7188019951777	20.15744	10.07967	73.95591	0.06043	0.03572	0.08775	60.79	2.6274	0.05282	6.73383	3.62529	0.27743	137.37013
145485	5910626	1	6	NO	4.44	3.31	2.10419650704714	2.20407197404169	5.21843767043119	1537902756.01	FALSE	0.923007488250732	2.27971769875343	0.478696550143288	0.519	0.565101788789081	0.612	0.980842305478947	1537902755.25299	0.757006168365479	1.30	0.563333000212258	0.759478547460504	1.0033	0.569014472724119	5.69439081378498	57.9954793187527	3.00153	4.18288	65.17988	0.06053	0.05385	0.08361	22.84	13.6953	0.03844	4.98614	3.19509	0.23749	101.71730
135868	5510736	1	6	NO	4.93	10	2.95762204012217	5.90481763829428	6.95821709540017	1529120154.47868	FALSE	1.3010048866272	2.27333661120188	0.814457458654916	0.626	0.316654749347019	0.243	0.668871565811142	1529120154.06668	0.412001609802246	1.62	0.256450937405641	0.393162911612072	0.9543	0	7.38856602397785	40.9153046462853	3.10268	0.46900	44.48699	0.03275	0.03012	0.06524	65.89	22.7659	0.04117	6.52666	2.18073	0.25709	133.14390
135867	5510571	1	6	NO	5.22	16	1.86770989785557	1.63093393957779	5.58805213085829	1529169053.22804	FALSE	0.823003530502319	2.26938260728434	0.958715133209906	1.165	0.306398198040384	0.372	1.07101685045797	1529169052.31603	0.912003755569458	1.17	0.338104235472248	0.394361614835435	0.4324	2.16380938708388	4.00967091430279	64.4541626395497	16.98288	1.73462	83.17166	0.06006	0.04654	0.06882	15.58	2.1117	0.01622	4.94406	4.07704	0.17595	100.85881
135867	5510551	1	6	NO	5.22	16	1.63785371156288	1.3300269027425	7.27387719448388	1529170375.80884	TRUE	0.722992181777954	2.26538232755869	0.686381758520612	0.949	0.572855684664995	0.792	0.220084759405224	1529170375.56384	0.244997501373291	0.90	0.234336000885858	0.163202713064601	0.6661	0.277368256730976	7.38480278922606	73.1116592397551	12.84008	8.94390	94.89564	0.03553	0.02737	0.06898	33.93	18.6555	0.01295	7.22927	4.65175	0.14354	147.47711
135867	5510563	1	6	NO	5.22	16	2.88504148027377	5.27549818122845	6.51246915900499	1529169771.47464	FALSE	1.27900099754333	2.25569916349970	0.670082054077812	0.524	0.33168602650436	0.259	1.08954066148759	1529169770.97464	0.500000238418579	2.18	0.268557990765622	0.557949042311364	1.1159	0	6.87747615755031	40.97591860964980	2.21045	0.54160	43.72797	0.03613	0.03385	0.05623	97.82	25.6517	0.06207	8.19590	2.14353	0.29907	167.19644
148052	6018083	1	6	NO	4.51	5	1.92756846460425	1.54676910264364	4.95752237232351	1540520548.22936	FALSE	0.857007503509521	2.24918504996828	0.789301092955333	0.921	0.634826059663105	0.741	1.34183246124828	1540520547.47335	0.756006717681885	1.77	0.632959931970245	0.668866448231732	0.8847	0.117884224926496	6.80937946094641	60.7999156288945	10.19457	6.59467	77.58915	0.07412	0.05809	0.08957	42.92	10.6645	0.05457	6.43007	3.80339	0.28500	131.17333
135867	5510603	1	6	NO	5.22	16	1.44174390868555	1.1042453676511	6.27695743157326	1529168869.0119	TRUE	0.645002841949463	2.23525202513528	0.676319044852979	1.049	0.143648012130632	0.223	0.346420224156799	1529168868.03289	0.979004621505737	0.35	0.0403174936602433	0.213356394160215	0.2179	0.840372264199885	4.69684771387659	79.7863486739602	17.55721	0.79205	98.13561	0.04401	0.03578	0.06364	1.32	0.4997	0.00179	4.89964	4.81057	0.16321	99.95261
134536	5451128	1	6	NO	4.98	34	2.11323370432634	2.13423116160931	5.64181414362164	1528149593.28918	FALSE	0.94599175453186	2.23388173755501	0.698075964304774	0.738	0.651631385348098	0.689	0.92279911637765	1528149592.75619	0.532995462417603	1.73	0.499716225891901	0.484182008824475	0.9084	0.150745098508386	6.32705492428133	54.33381867526770	5.92899	5.16629	65.42910	0.05328	0.04424	0.06838	57.93	15.9472	0.04350	6.82859	3.20731	0.22760	139.30328
135335	5485519	1	6	NO	4.24	5	2.87907081730952	4.94500868332035	5.28844260728585	1528742990.78181	FALSE	1.28998780250549	2.23185894604400	0.58040582767848	0.450	0.33895111491118	0.263	1.34914727597012	1528742990.18082	0.600994348526001	2.24	0.368721350237394	0.691749103018458	1.1510	0	5.93279878298344	39.77270308853090	1.61638	0.55126	41.94034	0.05300	0.05026	0.08245	86.37	22.7051	0.09990	7.40254	2.05590	0.43518	151.01183
146057	5933581	1	6	NO	5.1	8.17	2.2808510081413	2.75538623779878	5.31598932944549	1538448296.27906	FALSE	1.02301239967346	2.22954385388617	1.00333176856495	0.981	0.958830925016621	0.937	1.68549846222962	1538448295.51105	0.768009185791016	2.19	0.95084363332175	0.996874414960588	1.2980	0	6.47461464646381	50.0481887798028	9.68464	8.84461	68.57744	0.06801	0.04964	0.07390	64.59	22.5953	0.07053	7.63564	3.36164	0.29386	155.76716
145873	5926001	1	6	NO	4.82	12.7	1.860762724373	1.89658693976188	7.65441037064817	1538279531.91609	FALSE	0.835005044937134	2.22844488863309	1.12568061198671	1.348	0.345984586441707	0.414	0.760763892249684	1538279530.66008	1.25600743293762	0.61	0.306580036718698	0.292163874271206	0.2326	1.61929400045994	6.05849063474393	61.2564636745433	22.41818	2.11779	85.79243	0.03350	0.02392	0.08448	3.01	0.4437	0.00511	4.37474	4.20551	0.22007	89.24473
145485	5910618	1	6	NO	4.44	3.31	2.29447072600122	2.34142066567907	6.23202033255802	1537901217.51491	FALSE	1.03399968147278	2.21902459653864	0.715020392890111	0.692	0.315254377475083	0.305	0.670626823387874	1537901217.15891	0.355999946594238	1.88	0.313742902948622	0.439105651624906	1.2334	0	6.59236880472403	49.05023043740940	4.76335	0.92597	54.73956	0.03993	0.03578	0.07866	102.67	44.0175	0.07258	9.87394	2.68331	0.38911	201.42842
131061	5307685	1	6	NO	4.39	22.7	2.99624998142339	6.45225913877274	6.57945613822551	1525194355.01968	FALSE	1.35600757598877	2.20961153497877	1.22404775120924	0.903	0.561667401159979	0.414	1.37949732512335	1525194354.22968	0.79000449180603	1.75	0.497062602256492	0.896035431682045	1.1342	0.207495157658193	6.43808947987024	37.08574139720160	6.18939	1.30319	44.57832	0.03826	0.03183	0.08593	39.75	16.7725	0.06348	4.95616	2.18521	0.30845	101.10573
135335	5485519	1	6	NO	4.24	5	2.20253274481246	2.0591774697966	5.04741398885189	1528742993.93978	FALSE	1.00099062919617	2.20035301087800	0.634134278696363	0.634	0.453122986963274	0.453	0.95104859135305	1528742993.40679	0.532994985580444	1.78	0.452061888827836	0.432562442391781	0.8116	0	5.59017242511708	49.81864792939020	4.12962	2.10853	56.05679	0.06034	0.05363	0.08551	61.53	12.7282	0.06032	6.38789	2.74788	0.30464	130.31301
146255	5940352	1	6	NO	5.34	24.95	2.36101586969356	2.41709427465072	3.81904654453328	1538679336.42491	FALSE	1.07900023460388	2.18815139605630	1.19059529593822	1.103	0.764774806331065	0.709	0.652591382678892	1538679335.44591	0.979000329971313	0.67	0.760225164806981	1.03877040482021	1.0611	0.0466533209992761	4.78972128521451	45.70570579936460	11.62254	4.79556	62.12381	0.12591	0.09264	0.06440	4.67	11.8448	0.01554	3.85507	3.04528	0.15550	78.64350
135867	5510601	1	6	NO	5.22	16	2.48049772331376	2.98066383364662	6.77107497119708	1529168371.8766	FALSE	1.13400530815125	2.18737752414728	0.654694425484606	0.577	0.323810861651428	0.286	1.01947420492546	1529168371.2316	0.645003080368042	1.58	0.304132645660439	0.692425670502164	1.0735	0.339042714610846	7.1867322756221	43.45798922381870	3.02740	0.74058	47.22597	0.03200	0.02945	0.05385	39.89	18.4034	0.03781	5.17270	2.31500	0.18875	105.52308
135867	5510558	1	6	NO	5.22	16	1.94327754855868	1.5164215779229	6.25724616372522	1529173013.92309	FALSE	0.888990640640259	2.18593701634374	0.790868277749844	0.890	0.173297547636788	0.195	1.54681600398722	1529173013.0891	0.833991289138794	1.85	0.144939630496159	0.804943670990395	0.9652	0.590807621143852	5.58678225160448	55.3624530294244	9.16968	0.44028	64.97241	0.04042	0.03444	0.05808	42.48	11.5049	0.04527	5.83146	3.18492	0.20609	118.96178
135867	5510570	1	6	NO	5.22	16	2.30924653421355	2.51730745955194	6.60839033793793	1529169020.7639	FALSE	1.05700421333313	2.18470892082032	0.943481057029672	0.893	0.246576181784869	0.233	0.848792302973319	1529169020.2749	0.489002227783203	1.74	0.324060956043211	0.541265831197263	1.1069	0.71918993055554	6.4450238498116	46.51014252129430	7.76378	0.53028	54.80421	0.03634	0.03084	0.05824	63.46	25.8063	0.04389	7.06233	2.68648	0.22395	144.07162
149002	6057072	1	6	NO	4.81	10.4	2.03789869392303	1.62218381238587	5.89907216302597	1541733389.11297	FALSE	0.934004783630371	2.18189320830023	0.792416787543165	0.848	0.681779943420676	0.730	1.55932104533821	1541733388.35597	0.757004022598267	2.06	0.680077684291441	0.640907764900862	0.8466	0.443297225816658	7.4593462093481	52.4994924816146	7.93775	5.87595	66.31319	0.04876	0.03861	0.07334	57.73	9.7529	0.06049	6.55871	3.25065	0.26792	133.79771
145873	5926004	1	6	NO	4.82	12.7	2.49430632720453	3.17083934334461	7.08268320369364	1538280480.72371	FALSE	1.14500665664673	2.17842080893168	0.752988958200707	0.658	0.726980657430482	0.635	0.509040402263303	1538280480.18971	0.534003257751465	0.95	0.425921284014897	0.319726819294443	0.5987	0.8358424463603	6.45842301352162	42.68868402673590	3.89037	3.62626	50.20531	0.03140	0.02670	0.06779	17.53	6.9145	0.01539	3.65916	2.46104	0.14780	74.64695
146255	5940306	1	6	NO	5.34	24.95	2.14797422666152	1.88885844822438	7.66560501336286	1538680880.08576	FALSE	0.988501071929932	2.17296094830515	0.816992233168782	0.826	0.165491811603593	0.167	0.897747875080157	1538680879.54158	0.544174909591675	1.65	0.161392166202641	0.520843961784744	0.9571	0	8.44815655058859	49.1998663375221	7.11773	0.29205	56.60965	0.02609	0.02268	0.05376	51.51	17.3395	0.03600	6.15019	2.77498	0.18475	125.46378
145485	5910623	1	6	NO	4.44	3.31	1.61495455652779	1.29126963700638	4.59863147145722	1537901534.53417	TRUE	0.745006084442139	2.16770653321183	0.49322530038466	0.662	0.484143665550425	0.650	0.00122343494403322	1537901534.37817	0.156001329421997	0.01	0.424611403292532	0.160803045119362	1.0308	0	5.09957667971999	64.9648407392171	6.05966	5.83857	76.86307	0.07419	0.06270	0.07958	0.00	70.1521	0.01521	7.20683	3.76780	0.18410	147.01926
148052	6018086	1	6	NO	4.51	5	2.52748604169428	3.26080188642858	6.7200699802534	1540520856.57109	FALSE	1.16801047325134	2.16392412531938	1.21223669571817	1.038	0.885447659029991	0.758	2.04706648088263	1540520855.72608	0.845007419586182	2.42	0.879135000143137	0.688234883254387	0.8145	0.256137393870302	7.31717129781466	41.29282022033350	9.49887	5.06784	55.85953	0.03958	0.02926	0.08788	71.54	8.0859	0.09062	6.64121	2.73821	0.36735	135.48060
145873	5926006	1	6	NO	4.82	12.7	2.69309707961686	3.58700268916597	6.6068955264518	1538281145.39465	FALSE	1.24500751495361	2.16311712762409	0.782749229797383	0.629	0.212097622116047	0.170	0.940148993720572	1538281144.84965	0.545003175735474	1.73	0.234861148152409	0.440881240282732	0.8090	0.514497784029952	6.5433754758167	38.71019187570840	3.27014	0.24010	42.22043	0.03299	0.03025	0.06199	56.24	12.3675	0.04409	5.43267	2.06963	0.23394	110.82645
145485	5910627	1	6	NO	4.44	3.31	1.63409907921666	1.19542992619293	5.56123405495556	1537902943.62651	TRUE	0.757005929946899	2.15863444997226	0.701727020340921	0.927	0.730229854917084	0.965	1.37811396031729	1537902943.0815	0.545004367828369	2.53	0.723941213256236	0.733239777120843	1.3454	0	6.11466857549004	63.4010062457756	11.69165	12.66072	87.75338	0.05885	0.04252	0.09232	120.84	34.2081	0.11744	11.90199	4.30164	0.43934	242.80062
133839	5421993	1	6	NO	4.01	3	1.75410556980956	1.50688967224653	3.63663232098517	1527472284.51579	TRUE	0.823044300079346	2.13124077238668	0.914672816850999	1.111	0.780564322244093	0.948	1.08082738747988	1527472284.02677	0.489026546478271	2.21	0.775921541135168	0.339707317345713	0.6947	0	4.4322182920391	56.8432689021581	15.45607	11.25602	83.55536	0.14246	0.09692	0.11717	102.89	10.1637	0.09419	9.63746	4.09585	0.43951	196.60414
131062	5307691	1	6	NO	4.41	5	2.13320650698935	2.08067559595293	4.5980767984201	1525055657.38272	FALSE	1.00098943710327	2.13109791963696	0.609583180345901	0.609	0.595870964515355	0.595	0.915960932288743	1525055657.03772	0.344996452331543	2.65	0.460131310761505	0.560042777230387	1.6233	0	4.64645873402887	46.73201854067920	3.81606	3.64631	54.19438	0.07030	0.06062	0.07642	210.45	78.6748	0.14052	16.82933	2.65659	0.65098	343.31838
145485	5910621	1	6	NO	4.44	3.31	2.39108884433317	2.5237213223253	5.5902246981055	1537900722.22563	FALSE	1.12300896644592	2.12918054599372	0.585440144457599	0.521	0.457587499033682	0.407	0.883171361060394	1537900721.60263	0.623005151748657	1.42	0.168300939997549	0.587488541874601	0.9430	0.031550927698329	5.70129738426704	41.57947292388000	2.49260	1.52278	45.59485	0.04489	0.04094	0.07116	33.22	14.7015	0.04150	4.58433	2.23504	0.22693	93.52036
148519	6037905	1	6	NO	5.34	24.95	2.11543497272491	2.36638822914107	6.62665909641645	1541093792.94773	FALSE	1.00099658966064	2.11332885104243	1.46029371308512	1.459	0.410418103268143	0.410	0.516739602366057	1541093792.33673	0.610997915267944	0.85	0.297129660222685	0.326764241541782	0.5348	0.534434275590419	7.0180485061892	45.95563706353200	21.89878	1.72979	69.58420	0.04346	0.02870	0.06692	12.06	4.8216	0.00991	4.23840	3.41099	0.13391	86.46337
131062	5307692	1	6	NO	4.41	5	2.4194393955971	2.51480502409952	5.1842706008663	1525056115.63091	FALSE	1.15698790550232	2.09115357566912	0.988834192541291	0.855	0.627412366621426	0.542	0.974196890177907	1525056114.98591	0.64499306678772	1.51	0.616980973878036	0.750825215314623	1.1641	0.169287382546055	5.04558219459814	38.9296288571767	6.50276	2.61792	48.05031	0.05667	0.04591	0.07832	36.43	21.6396	0.05276	5.20198	2.35541	0.26939	106.12048
148052	6018077	1	6	NO	4.51	5	1.71663102648038	1.2499199708559	5.06055817596107	1540523866.45185	TRUE	0.822991847991943	2.08584207810669	0.765889588534913	0.931	0.351671496382971	0.427	1.17701559079755	1540523865.41786	1.03398990631104	1.14	0.351029040890196	0.353846028582588	0.3422	0	6.97897500472278	54.4508344885613	10.83884	2.28520	67.57488	0.05950	0.04794	0.07491	12.91	1.1666	0.01960	4.00242	3.31249	0.20423	81.64928
134536	5451136	1	6	NO	4.98	34	3.61526196733655	7.9275454221657	6.57477518006374	1528152447.69437	FALSE	1.73498487472534	2.08374264237253	0.865539064661091	0.499	0.402021535161495	0.232	0.917217117492547	1528152447.28237	0.411996364593506	2.23	0.399885251410114	0.581199456512103	1.4107	0.517559950768364	6.94776890213811	25.77684086346220	1.47749	0.31875	27.57308	0.03032	0.02834	0.05285	123.91	49.7516	0.07904	9.86438	1.35162	0.47728	201.23330
135867	5510570	1	6	NO	5.22	16	1.8884391096645	1.49454342662978	6.21112577080001	1529169027.43693	FALSE	0.912003993988037	2.0706478503528	0.88934327861567	0.975	0.314643294970149	0.345	0.96094767040583	1529169026.96993	0.467001914978027	2.06	0.261858427091166	0.354002021270005	0.7580	0	6.21822084628461	48.4231431538415	10.73954	1.34426	60.50695	0.03919	0.03136	0.05548	93.39	12.6734	0.04980	8.16501	2.96603	0.23095	166.56611
145485	5910628	1	6	NO	4.44	3.31	2.80897978845353	3.873251582781	6.14486162794117	1537903475.19078	FALSE	1.35701107978821	2.06997557373808	0.848663789095815	0.625	0.3559099617696	0.262	1.2204035409717	1537903474.61278	0.578004598617554	2.11	0.306844158348798	0.715553591078219	1.2380	0	5.96261327608873	32.52252621870450	2.96865	0.52212	36.01329	0.03546	0.03202	0.06792	79.44	27.3104	0.08575	6.99832	1.76536	0.38393	142.76568
135867	5510557	1	6	NO	5.22	16	2.34624396224501	2.47799771322989	6.79260312753158	1529172809.82524	FALSE	1.13398814201355	2.06901983831942	0.904127241930951	0.797	0.394535708624153	0.348	0.892494360036903	1529172809.40224	0.422995567321777	2.11	0.391829041051719	0.416868163163848	0.9855	0	6.73743897529628	38.88284383883280	5.77392	1.09947	45.75624	0.03081	0.02618	0.05217	108.40	23.6498	0.05616	8.71612	2.24295	0.27836	177.80888
148519	6037909	1	6	NO	5.34	24.95	2.06754717167785	2.01532199526642	8.62563262822987	1541095847.52773	FALSE	1.00099658966064	2.06548872696838	0.941011374559973	0.940	0.297986950441388	0.298	1.13741730503309	1541095846.62673	0.900996923446655	1.26	0.186174444625075	0.319242909463633	0.3543	1.41926430257902	7.42382280355018	43.89856106463060	9.09346	0.91187	53.90389	0.01987	0.01618	0.05184	18.22	1.4352	0.01701	3.60575	2.64235	0.13442	73.55735
135335	5485518	1	6	NO	4.24	5	2.38184611400183	2.63909997947431	5.42307067239853	1528746884.4928	FALSE	1.15506291389465	2.06209210368525	0.513076430727428	0.444	0.304485398648039	0.264	0.952368894561687	1528746884.02658	0.466218233108521	2.04	0.302263066776821	0.492157435999363	1.0556	0	4.61231431873581	37.91819914497710	1.75948	0.61966	40.29734	0.04336	0.04080	0.07093	92.19	24.6194	0.08299	7.70127	1.97536	0.38817	157.10591
145873	5926004	1	6	NO	4.82	12.7	2.15362275931223	2.01215809719584	6.69913942326957	1538280476.04069	FALSE	1.04600620269775	2.05890056269058	1.02603084400192	0.981	0.277412769073699	0.265	0.885017330471296	1538280475.52968	0.511003017425537	1.73	0.305422403788893	0.306021546753185	0.5989	0.298494767506542	6.81479540036731	41.74204380048660	9.47448	0.69261	51.90913	0.03315	0.02665	0.06403	60.46	7.2289	0.04079	5.86266	2.54457	0.21960	119.59832
148052	6018093	1	6	NO	4.51	5	2.23804165036906	2.2987630773223	6.84453015208558	1540524609.90126	FALSE	1.09000968933105	2.05323096874723	0.762384968411407	0.699	0.610556123374775	0.560	0.708387924227764	1540524609.02226	0.879007816314697	0.81	0.575043661398917	0.534119600550321	0.6076	0	7.65885606191369	39.83661958104460	4.62269	2.96481	47.42412	0.03023	0.02539	0.06963	7.61	4.3265	0.01413	2.90985	2.32471	0.15744	59.36091
135868	5510642	1	6	NO	4.93	10	2.76023207214466	4.22364950405467	5.39673619681666	1529122091.1084	FALSE	1.34601211547852	2.05067401727166	0.924786862588479	0.687	0.740379383529374	0.550	1.0949374976083	1529122090.7084	0.400003433227539	2.74	0.661557610819874	0.465144855621461	1.1629	0	6.15506276100229	32.17966460373660	3.61222	2.31526	38.10714	0.04825	0.04075	0.05782	192.94	34.8195	0.10270	13.03273	1.86800	0.52327	265.86772
133415	5404239	1	6	NO	4.91	1.9	1.61883200321439	1.31786482643944	5.00612444284729	1527224843.45306	TRUE	0.789997100830078	2.04916195453556	0.729393273732757	0.923	0.308080994976804	0.390	1.48774464017169	1527224842.46406	0.988996028900146	1.50	0.303964040683927	0.782589558982659	0.7913	0	7.88531586571561	54.7475003749888	11.11435	1.98285	67.84471	0.05859	0.04728	0.06091	23.57	6.5211	0.03382	4.80064	3.32572	0.19799	97.93315
146057	5933539	1	6	NO	5.1	8.17	1.42856722116021	1.06316627001142	6.27257762209892	1538449111.99623	TRUE	0.700554370880127	2.03919535804974	0.887883909898749	1.267	0.298419399937414	0.426	0.448090559394208	1538449111.35164	0.644589900970459	0.70	0.296683875219253	0.319150279322213	0.4951	0.763592341903839	6.40868976595544	61.1382558952478	23.61696	2.66788	87.42310	0.04265	0.02982	0.06451	7.72	3.9172	0.00790	4.85599	4.28545	0.14036	99.06211
145873	5926005	1	6	NO	4.82	12.7	2.30428651932376	2.01956359850538	6.59082809820408	1538280896.38518	FALSE	1.13400673866272	2.03198661944557	0.557236840103491	0.491	0.982135571272449	0.866	1.81370382022482	1538280895.55117	0.834004878997803	2.17	0.980301308964749	0.63947849059099	0.7668	0.161796304723184	7.58030323948628	37.50276400710970	2.19316	6.81292	46.50884	0.03326	0.02682	0.06220	58.41	7.2608	0.06459	5.49885	2.27985	0.26034	112.17653
135867	5510570	1	6	NO	5.22	16	2.32560001429781	2.49187205013377	6.60296767164111	1529169023.90091	FALSE	1.14500498771667	2.03108286797549	0.785171384107089	0.686	0.277268696399591	0.242	1.03239209307886	1529169023.38891	0.512001991271973	2.02	0.228393863370569	0.412132454988628	0.8049	0	6.48191431811158	37.10950249705350	4.23004	0.52749	41.86703	0.03012	0.02670	0.04820	81.79	13.0345	0.04882	6.70067	2.05231	0.22774	136.69373
148052	6018061	1	6	NO	4.51	5	1.62564972449974	1.23002446419749	3.49333746310992	1540522675.26441	TRUE	0.800768136978149	2.03011289963964	0.58015248803889	0.724	0.498320358888616	0.622	2.09910990461194	1540522673.40795	1.85646200180054	1.13	0.646018181145583	0.428900957827325	0.2310	0.124905238025811	5.25291344948454	53.0115890082874	6.75151	4.98120	64.74431	0.11640	0.09530	0.06983	7.09	0.2961	0.01848	3.53597	3.17374	0.25818	72.13376
135868	5510723	1	6	NO	4.93	10	2.20710209255378	1.95346196816198	5.62036113115409	1529120939.43031	FALSE	1.09000086784363	2.02486269292623	0.697831768481492	0.640	0.297175706138513	0.273	0.791304325595249	1529120938.87431	0.556000471115112	1.42	0.402392799898637	0.388981652259866	0.6996	0.153268836045137	5.260124437544	38.74373973036540	3.87310	0.70240	43.31923	0.04095	0.03663	0.05323	37.52	9.0671	0.02920	4.40733	2.12349	0.16682	89.90948
148519	6037899	1	6	NO	5.34	24.95	1.93399351944289	1.61272090479571	5.7735726274198	1541096380.87471	FALSE	0.95599365234375	2.02301920593452	0.937101203282915	0.980	0.49456082264699	0.517	1.23381230971945	1541096380.31871	0.555996179580688	2.22	0.441504920323381	0.618997926136473	1.1133	0.419417229327747	7.29799884125469	44.09427717927560	10.35250	2.88344	57.33022	0.04505	0.03465	0.05266	91.23	22.9615	0.06100	8.40775	2.81030	0.24916	171.51800
131062	5307697	1	6	NO	4.41	5	1.54821840997126	1.27811899521143	4.89708589725843	1525055448.91866	TRUE	0.767995357513428	2.01592157403659	0.414253851040641	0.539	0.349243864915376	0.455	1.92107752101006	1525055448.11767	0.800995349884033	2.40	0.345814217729759	0.802570397013011	1.0020	1.04983515246705	6.54862070423077	54.5036886681045	3.90207	2.77344	61.17920	0.05368	0.04782	0.06619	73.97	12.9096	0.09803	7.25763	2.99898	0.32725	148.05565
135335	5485521	1	6	NO	4.24	5	1.94606268957438	1.70279763242836	5.63883161417395	1528744266.83181	FALSE	0.967990875244141	2.01041429144005	1.23490638743202	1.276	0.825609249880551	0.853	1.99979178507363	1528744265.96482	0.866991996765137	2.31	0.822262258874764	0.737828390980881	0.8510	0.689002226388473	8.03542812394015	43.006795811719	17.31775	7.74056	68.06511	0.05677	0.03587	0.10041	63.21	8.6040	0.09488	6.85665	3.33653	0.39116	139.87562
131629	5330578	1	6	NO	4.94	7.4	3.01433083501404	5.71801151244324	6.14192013110073	1525751050.96095	FALSE	1.50101900100708	2.00818965848642	1.17178831901451	0.781	0.572747332356623	0.382	1.87309828656598	1525751050.19394	0.767009496688843	2.44	0.569527542636401	0.68793597321179	0.8969	0.899470261713582	5.73513816836866	27.67327044360160	4.18193	0.99909	32.85429	0.03582	0.03017	0.05536	80.09	10.8027	0.07826	6.06583	1.61050	0.31508	123.74287
135868	5510677	1	6	NO	4.93	10	1.75840598053459	1.60114825321454	5.92314636642475	1529121926.64755	TRUE	0.87801456451416	2.00270707526086	1.22918184124373	1.400	0.479667267717835	0.546	0.11957498590931	1529121926.36954	0.27800464630127	0.43	0.471318608498429	0.298329042143781	1.0731	0.59324495395707	6.70683852260496	47.05116367249370	22.99134	3.50116	73.54367	0.05043	0.03226	0.07279	6.85	42.6650	0.01552	6.03250	3.60508	0.16036	123.06298
146057	5933498	1	6	NO	5.1	8.17	1.9140468923326	1.5272810665308	5.69919145007547	1538450130.45552	FALSE	0.957046270370483	1.99995230281985	0.935812621146825	0.978	0.192653815476093	0.201	0.75924196116321	1538450129.9775	0.478023052215576	1.59	0.305205667541683	0.295280614627351	0.6177	0	5.67796468338942	43.0470669758342	10.29002	0.43611	53.77319	0.04341	0.03475	0.05421	54.36	8.2217	0.03151	5.70350	2.63594	0.17588	116.35133
146255	5940335	1	6	NO	5.34	24.95	2.37251359569701	2.6766281202848	7.45098717020552	1538677753.83416	FALSE	1.18999171257019	1.99372278868461	0.936850475256952	0.787	0.429944468125839	0.361	1.1413745827109	1538677753.18916	0.64499568939209	1.77	0.425889266119642	0.662791976092926	1.0276	0.837965704530779	7.77596785929676	34.40510073823270	5.36471	1.12987	40.89968	0.02402	0.02020	0.04676	50.01	16.8625	0.04144	5.28276	2.00489	0.19000	107.76828
133415	5404256	1	6	NO	4.91	1.9	1.456441943667	1.0903436417832	6.75540539799218	1527222968.73307	TRUE	0.73400616645813	1.98423665933886	0.72390197227963	0.986	0.238620205591644	0.325	0.556130411565127	1527222968.28806	0.445003747940063	1.25	0.204201704072653	0.432330389271775	0.9715	0.558853397688113	6.4022107268972	55.2490041526578	13.64890	1.48304	70.38094	0.03101	0.02435	0.05871	36.15	21.8463	0.02933	6.29297	3.45005	0.17201	128.37650
145873	5926017	1	6	NO	4.82	12.7	2.513451522721	2.69775169061881	5.97406945185907	1538278998.49105	FALSE	1.26700305938721	1.98377699572141	0.547083369479088	0.432	0.302247171123419	0.239	1.14827694760975	1538278997.95705	0.534001350402832	2.15	0.17325852334283	0.529275078277977	0.9911	0.663058579452595	5.74142854491352	31.9922850523859	1.51569	0.46262	33.97060	0.03304	0.03112	0.05076	89.19	18.9484	0.06810	6.96600	1.66523	0.30182	142.10641
131629	5330578	1	6	NO	4.94	7.4	2.27047595409467	2.10122297281906	5.20323090626138	1525751042.38684	FALSE	1.14501428604126	1.98292369079913	0.66657038473429	0.582	0.40822192989574	0.357	1.72341469112425	1525751041.48583	0.901011228561401	1.91	0.406956265567787	0.815108203424302	0.9047	1.7289691240575	7.29480729894978	35.37026571468020	3.04857	1.14340	39.56224	0.04584	0.04098	0.05086	41.82	9.3557	0.05177	4.44814	1.93933	0.20844	90.74201
146255	5940324	1	6	NO	5.34	24.95	2.12947192019332	1.75511180595422	5.57375000983909	1538681153.45446	FALSE	1.07899045944214	1.97357808084262	0.886665170539499	0.822	0.493168507892896	0.457	1.16811263843419	1538681152.85347	0.600994825363159	1.94	0.491316238428665	0.541941291599783	0.9017	0.392604594975596	6.24192468504471	37.18161471503770	6.44620	1.99423	45.62204	0.04341	0.03538	0.04730	64.74	13.9357	0.04543	6.09319	2.23637	0.20063	124.30101
131062	5307692	1	6	NO	4.41	5	2.09816859105701	1.87102745020234	4.48745211981131	1525056113.19493	FALSE	1.06798887252808	1.96459780155794	0.586853690501985	0.549	0.561645915412766	0.526	1.90645690405981	1525056112.33894	0.855990886688232	2.23	0.568010703881518	0.871232675106489	1.0178	0.8421652736484	5.69139865809296	37.22355129162040	2.91204	2.66724	42.80283	0.06219	0.05409	0.06440	59.69	12.4652	0.08701	5.63508	2.09818	0.31157	114.95555
131062	5307691	1	6	NO	4.41	5	2.57518937670889	3.21101603174791	4.69979040439565	1525055652.93477	FALSE	1.31198620796204	1.96281741460456	0.683743377463505	0.521	0.393191903322818	0.300	1.04378988540811	1525055652.42277	0.511994600296021	2.04	0.348420195230288	0.577799693841379	1.1285	0	5.24568742886987	30.24598692490210	2.13224	0.70511	33.08334	0.05384	0.04922	0.06115	83.61	25.6210	0.07879	6.97628	1.62173	0.36568	142.31605
135867	5510552	1	6	NO	5.22	16	2.74715366989496	4.77062895985407	6.17533017798052	1529170755.52385	FALSE	1.40098524093628	1.96087266990695	1.30104145733063	0.929	0.653318273193091	0.466	1.25059788551837	1529170754.96785	0.555994272232056	2.25	0.650906383064354	0.698245832279761	1.2559	0.773786285331556	7.70695214305906	28.26847964343240	6.34043	1.59877	36.20768	0.03644	0.02845	0.05100	93.73	29.2175	0.06873	7.80154	1.77489	0.31316	159.15152
131062	5307694	1	6	NO	4.41	5	2.24458716209948	2.10201504079879	5.08422816723633	1525054872.80512	FALSE	1.14599299430847	1.95863951459314	0.72493110581263	0.633	0.547486427733642	0.478	1.45658174131943	1525054871.91613	0.888994693756104	1.64	0.513978910722743	0.98564610014267	1.1087	0.791675817177433	5.59913646873533	34.47976410147080	3.59654	2.05134	40.12765	0.04874	0.04188	0.06478	31.10	14.2424	0.05679	4.18988	1.96704	0.24503	85.47351
146057	5933498	1	6	NO	5.1	8.17	2.33773135228613	2.70899798921941	6.71877437471319	1538450120.17802	FALSE	1.20205807685852	1.94477404818542	1.21249803515779	1.009	0.390292637360346	0.325	0.172550637639568	1538450119.95601	0.222010850906372	0.78	0.411702840652825	0.28105157458746	1.2659	0	7.55986299451127	32.40783915891340	8.71812	0.90332	42.02928	0.03066	0.02364	0.05322	28.03	74.3510	0.02394	7.07870	2.06026	0.21661	144.40539
148052	6018089	1	6	NO	4.51	5	1.51289489284484	1.1241860675728	6.10568288091491	1540522297.50882	TRUE	0.778007030487061	1.94457740555084	0.527583463834377	0.678	0.272945474753928	0.351	0.626908997274842	1540522296.84082	0.66800594329834	0.94	0.0858500572676573	0.304493431292545	0.4558	0.896653243626081	4.15643908911689	50.0615363633141	6.08792	1.62944	57.77890	0.03304	0.02862	0.06055	13.58	3.2037	0.01510	3.65504	2.83230	0.14523	74.56277
146057	5933583	1	6	NO	5.1	8.17	2.68067574008271	4.27820365683667	7.39609725674018	1538449698.00987	FALSE	1.37901663780212	1.94390384176595	0.829656399684525	0.602	0.43472364282396	0.315	1.05944433684628	1538449697.34186	0.668008089065552	1.59	0.431091161808484	0.572695623633973	0.8573	0.610313228809715	6.38541123413343	28.22391625830320	2.70349	0.74226	31.66967	0.02187	0.01949	0.04600	38.78	11.3329	0.03526	4.00913	1.55243	0.17635	81.78616
133839	5422220	1	6	NO	4.01	3	1.83807491813154	1.51887536314932	5.24308497576487	1527472638.55841	FALSE	0.95601749420166	1.92263732544608	0.594557427758086	0.622	0.60474514941776	0.633	0.224460559722972	1527472637.50139	1.05701947212219	0.21	0.271670281637845	0.304508484013786	0.2881	1.54936029627201	3.93709388078955	39.82594813219260	4.16704	4.31106	48.30405	0.04602	0.03795	0.07868	0.44	0.8087	0.00225	2.42903	2.36785	0.16995	49.55216
135335	5485492	1	6	NO	4.24	5	1.99554068028068	1.5940974579976	5.20378284189604	1528745483.57729	FALSE	1.05597972869873	1.88975282957350	0.992702809906002	0.940	0.561918824101722	0.532	0.501197725668957	1528745483.33229	0.244995355606079	2.05	0.589976386486269	0.209616406968394	0.8556	0	5.5144140523877	34.83306193879500	8.62003	2.76196	46.21506	0.04938	0.03721	0.07437	175.95	30.7761	0.07718	12.39893	2.26544	0.50149	252.93820
133415	5404255	1	6	NO	4.91	1.9	2.68693813590199	4.04501273556594	5.83333958900671	1527222100.03688	FALSE	1.42401194572449	1.88687892961106	0.645075575021417	0.453	0.574543749997134	0.403	0.698315118215569	1527222099.60388	0.433003425598145	1.61	0.40129708904372	0.54942497121412	1.2689	0	6.89081065865808	25.75204139874530	1.48429	1.17745	28.41378	0.03258	0.02953	0.04598	61.87	38.2983	0.04929	6.30295	1.39283	0.27135	128.58013
135335	5485521	1	6	NO	4.24	5	3.11371241464535	6.68886831218282	6.0100216707583	1528744268.62279	FALSE	1.65698456764221	1.87914388308153	1.0233535601417	0.618	0.577978762413994	0.349	0.952828120426718	1528744267.7998	0.822992086410522	1.16	0.618949998215479	0.377276073872693	0.4584	0.609323240368203	6.52539436635523	21.95021762029930	2.37101	0.75632	25.07755	0.03152	0.02759	0.06333	16.78	2.6301	0.02434	2.18055	1.22929	0.16812	44.48328
133415	5404240	1	6	NO	4.91	1.9	1.96283439666645	1.49802283364417	6.05986354733281	1527224887.64789	FALSE	1.0449960231781	1.87831757550327	0.907578768399164	0.868	0.302592603396862	0.290	0.877074753420861	1527224886.98089	0.666997194290161	1.31	0.300557596537967	0.598929409795584	0.8979	0	7.00456607851813	34.7744789575958	7.43467	0.82644	43.03559	0.03355	0.02711	0.05111	26.70	12.4514	0.02968	4.02885	2.10959	0.15990	82.18861
149002	6057065	1	6	NO	4.81	10.4	2.14329973570291	2.18554909597991	5.63646467368391	1541734403.84299	FALSE	1.14598274230957	1.87027226202673	1.27514114813893	1.113	0.699645450790388	0.611	2.28397423310836	1541734400.92904	2.91395568847656	0.78	0.696625993675555	0.691778690068894	0.2374	1.83631443736974	4.30543448464133	31.43900646242470	11.12806	3.35011	45.91718	0.04538	0.03107	0.06231	2.17	0.1992	0.00818	2.36706	2.25084	0.23215	48.28795
135335	5485535	1	6	NO	4.24	5	1.93161936840753	1.52007040886155	5.37962653047835	1528744535.72952	FALSE	1.03400945663452	1.86808675299212	0.970122535992906	0.938	0.646032850090009	0.625	1.72493636421047	1528744535.10651	0.623005867004395	2.77	0.645303728092549	0.773577297309885	1.2417	0	6.48406082840204	34.76216331623230	8.76833	3.88842	47.41891	0.04642	0.03403	0.07472	126.74	25.4899	0.14453	9.78661	2.32446	0.50416	199.64685
131061	5307671	1	6	NO	4.39	22.7	2.04499405702561	1.75154867408137	4.59425343298429	1525196691.38725	FALSE	1.1009829044342	1.85742580451469	1.07556213894461	0.977	0.591493161184671	0.537	1.52906526340296	1525196690.16327	1.22398090362549	1.25	0.588409012984612	0.543866854570004	0.4443	0	8.97617535297492	32.2759919663015	8.92825	2.70019	43.90444	0.06274	0.04613	0.06872	13.13	1.6615	0.02574	2.87740	2.15218	0.19401	58.69897
131629	5330581	1	6	NO	4.94	7.4	2.41049602440313	2.33646716465117	5.33052585649216	1525750728.48191	FALSE	1.30101633071899	1.85277922151139	0.749141510487116	0.576	0.183778259049687	0.141	1.06813136149542	1525750727.9929	0.489006280899048	2.18	0.290077426223666	0.494956255249008	1.0122	0	5.89681180523821	27.17701911566540	2.62492	0.15797	29.95991	0.03758	0.03409	0.04376	100.49	21.5788	0.06702	7.45262	1.46862	0.30553	152.03345
133415	5404237	1	6	NO	4.91	1.9	1.59218673540398	1.13821410004292	6.90190698669734	1527224370.86089	TRUE	0.867996692657471	1.83432350476972	0.871773578500232	1.004	0.106330283257809	0.123	0.109359880149294	1527224370.59389	0.266999006271362	0.41	0.0817536257621453	0.189497683342092	0.7097	0	7.54030441843999	39.9273986994651	11.96990	0.17807	52.07537	0.02600	0.01993	0.05137	6.47	19.4319	0.00786	3.82250	2.55271	0.10058	77.97909
135867	5510601	1	6	NO	5.22	16	2.75078879707871	3.96902242844523	6.33126500391283	1529168367.85058	FALSE	1.50100684165955	1.83262908651194	0.683035842002508	0.455	0.364863707827687	0.243	0.995743982452942	1529168367.40558	0.44500207901001	2.24	0.25374505356025	0.498505613015721	1.1202	0	6.45923317140889	23.04643225987430	1.42094	0.40546	24.87284	0.02552	0.02364	0.03754	115.89	29.0463	0.06485	8.32399	1.21926	0.33226	169.80930
146255	5940326	1	6	NO	5.34	24.95	2.60721143738893	3.06428835897321	0	1538681602.32455	FALSE	1.43398761749268	1.81815477733875	0.796238004964793	0.555	0.362940277642668	0.253	0.879986458374278	1538681601.81255	0.511995553970337	1.72	0.361238564433446	0.682554838831818	1.3331	0	0	23.74398046856140	2.21456	0.46012	26.41866			0.03640	59.43	35.7531	0.04682	5.96077	1.29503	0.22735	121.59970
135868	5510674	1	6	NO	4.93	10	2.20105582386895	2.00829834207568	5.60691769085563	1529121517.64771	FALSE	1.2120201587677	1.81602245469814	0.950098830157674	0.784	0.767978372793325	0.634	1.38185119135639	1529121517.1357	0.512008666992188	2.70	0.766675625126398	0.855989897253706	1.6718	0	5.99994236515533	28.0265609286615	5.22210	3.41197	36.66064	0.03872	0.02960	0.05009	146.53	56.2267	0.11702	11.73617	1.79709	0.46528	239.41777
133415	5404255	1	6	NO	4.91	1.9	3.35205879968214	7.43696959945682	6.30094789958374	1527222104.34092	FALSE	1.84601521492004	1.81583487101829	1.05256097316874	0.570	0.550973019523254	0.298	1.19527363613347	1527222103.81891	0.522004365921021	2.29	0.498838554743579	0.963833275081081	1.8464	0.36683882539911	7.27847928936483	18.39732381250870	1.81395	0.49704	20.70832	0.02638	0.02344	0.04344	103.45	67.2696	0.10128	9.38394	1.01511	0.51516	191.43241
146057	5933583	1	6	NO	5.1	8.17	1.93253198877222	1.50656308907079	6.31094909505944	1538449710.90003	FALSE	1.06801295280457	1.80946493551174	0.608778040971287	0.570	0.677486456144589	0.634	0.990399993506359	1538449710.35502	0.545006513595581	1.82	0.675461648748257	1.01958730832038	1.8708	0.823024024907005	6.98569683460376	31.57628607945350	3.13347	3.88069	38.59045	0.02835	0.02320	0.04341	62.41	66.1426	0.07380	8.19328	1.89169	0.28398	167.14289
131567	5328502	1	6	NO	3.8	1.5	1.42420450701346	1.08046076627173	5.12233141095718	1525650529.52678	TRUE	0.789000749588013	1.80507370589588	0.663932308852797	0.841	0.383389069739555	0.486	0.654792030064854	1525650528.73678	0.790000915527344	0.83	0.284147486056466	0.163273585677117	0.2067	0.322296059010182	4.77029894061777	42.5353184769544	9.24384	3.08237	54.86153	0.04520	0.03504	0.08213	8.96	0.5569	0.01426	3.15566	2.68929	0.19286	64.37541
135335	5485523	1	6	NO	4.24	5	2.20492593485366	1.88298570438611	5.01091595232795	1528744437.41421	FALSE	1.22298860549927	1.80289981847666	0.528338074915686	0.432	0.27938373174568	0.228	0.977904920110338	1528744436.91321	0.50099515914917	1.95	0.29278665579599	0.43713713230215	0.8725	0.157601881940847	5.26606082918554	27.37524432421270	1.57179	0.43951	29.38655	0.03921	0.03653	0.05477	78.33	15.6521	0.07176	6.04750	1.44052	0.32413	123.36894
146255	5940320	1	6	NO	5.34	24.95	2.81153682735986	4.57151178660376	6.10558416602843	1538680063.25197	FALSE	1.56798624992371	1.79308768013537	1.27273318294185	0.812	0.913488882900633	0.583	2.10541967206092	1538680062.15098	1.10099053382874	1.91	0.906106874006312	0.669253729120743	0.6079	0.742126604432977	5.94665088702171	21.12020007620580	4.32798	2.22955	27.67773	0.03190	0.02434	0.04170	34.21	3.4568	0.03985	3.20320	1.35675	0.16757	65.34533
146255	5940323	1	6	NO	5.34	24.95	1.39484897030804	0.988508317280601	5.7644293834308	1538681099.23493	TRUE	0.778993368148804	1.79057874860058	0.702150352487847	0.901	0.538459150223854	0.691	0.120800196456302	1538681098.97894	0.255997657775879	0.47	0.537044551647101	0.159475750676315	0.6230	0	5.32145192678724	42.3926256321787	10.74227	6.31744	59.45234	0.03819	0.02723	0.04450	8.96	15.6142	0.00604	4.11890	2.91433	0.08356	84.02560
135867	5510555	1	6	NO	5.22	16	1.62462016073532	1.17303226281134	7.70659864450641	1529172490.82059	TRUE	0.933990001678467	1.73944063407074	0.872660968746674	0.934	0.370729312614542	0.397	1.21933170231458	1529172490.0306	0.789991855621338	1.54	0.28949380043847	0.583360540301255	0.7384	0.41632078822189	8.34731180345277	33.3667740065697	9.62724	1.73750	44.73151	0.01927	0.01438	0.04201	31.06	7.1096	0.03032	4.06382	2.19272	0.14370	82.90192
133413	5404176	1	6	NO	4.19	0.5	1.79591009510902	1.51919281873039	5.68633010643488	1527285122.17159	TRUE	1.03401708602905	1.73682825881135	0.461268134658249	0.446	0.686867837541437	0.664	0.441728631745587	1527285121.62658	0.545008897781372	0.81	0.680302739362753	0.271598521381385	0.4983	0	5.88557293852474	30.04853222064210	1.98226	4.39542	36.42621	0.03191	0.02633	0.05878	12.41	4.6933	0.01455	2.62423	1.78560	0.13192	53.53428
135868	5510642	1	6	NO	4.93	10	1.95901303384032	1.60810862932438	6.48743493265486	1529122086.12536	FALSE	1.13501000404358	1.72598745990005	1.00253445699168	0.883	0.603451231421045	0.532	0.476835062392173	1529122085.84736	0.278002500534058	1.72	0.600935630045925	0.271723549419836	0.9774	0	6.96502747693911	27.03415548896240	7.08006	2.56521	36.67942	0.02710	0.01997	0.04693	109.00	35.3953	0.04525	8.87622	1.79801	0.28841	181.07497
146255	5940306	1	6	NO	5.34	24.95	2.01050339044216	1.54944509824173	8.2218161200027	1538680874.33348	FALSE	1.16523337364197	1.72540834816486	0.586408101209372	0.503	0.343162616266055	0.295	0.845100415901734	1538680873.62256	0.710922241210938	1.19	0.0296120042347438	0.697232988757776	0.9807	0	9.84977986066599	26.31528633075920	2.23871	0.76665	29.32065	0.01385	0.01243	0.03283	20.47	13.9356	0.02350	3.12400	1.43729	0.11488	63.72957
135867	5510562	1	6	NO	5.22	16	2.79414213372872	4.48323265318653	6.56248339724741	1529169483.92141	FALSE	1.62400150299072	1.72052927819531	1.10810533512233	0.682	0.553261837070948	0.341	1.59094220861028	1529169483.14341	0.778000593185425	2.04	0.550807705615053	0.713211709439378	0.9167	0.17992532982479	9.04655904745809	18.77478328330410	2.95284	0.73610	22.46373	0.02321	0.01940	0.03668	55.36	11.1259	0.05201	4.36034	1.10116	0.21483	88.95090
133415	5404235	1	6	NO	4.91	1.9	2.19873781895177	1.91383530301871	5.21528495090271	1527223325.34495	FALSE	1.27899503707886	1.71911364407914	0.775590301354191	0.606	0.202825703461276	0.159	0.765771857360023	1527223324.98895	0.355998754501343	2.15	0.241790505201484	0.466229708602311	1.3096	0	5.22572199539255	23.80003193639560	2.96139	0.20252	26.96394	0.03474	0.03066	0.03919	133.87	49.6240	0.07424	10.31668	1.32176	0.39105	210.46019
135867	5510613	1	6	NO	5.22	16	2.96225393391565	4.83175208262484	7.05186818928819	1529168164.45338	FALSE	1.73501324653625	1.70733793521718	0.841083925954739	0.485	0.318744318101159	0.184	1.06737205470062	1529168163.44137	1.01200771331787	1.05	0.336771996033706	0.599015658898204	0.5919	0	8.28093444748081	17.30507196862420	1.39511	0.20036	18.90054	0.01807	0.01654	0.03297	11.32	3.5658	0.01515	1.65629	0.92650	0.09332	33.78823
134536	5451133	1	6	NO	4.98	34	1.82485764680066	1.40744041672961	5.86902707002342	1528150889.95091	TRUE	1.07799053192139	1.69283272233205	0.966692374583578	0.897	0.534062430756336	0.495	1.89967987698299	1528150888.64892	1.30198884010315	1.46	0.366167161933894	0.886849619570066	0.6811	0.844131442856345	7.74944414492826	27.38106706105400	7.68367	2.34518	37.40992	0.03208	0.02348	0.04455	16.84	3.6704	0.02950	2.83930	1.83382	0.15229	57.92167
146255	5940306	1	6	NO	5.34	24.95	2.13691852724665	1.81440171141968	6.87213032883279	1538680893.88983	FALSE	1.26508188247681	1.68915432024284	1.10721884122419	0.875	0.379321810425882	0.300	1.26868723226408	1538680892.26829	1.62154150009155	0.78	0.385039229456343	0.464245932327911	0.2863	2.77079927023638	5.69402453594607	23.23042980719290	6.23661	0.73198	30.19901	0.02216	0.01705	0.03671	3.89	0.5207	0.00687	1.69647	1.48034	0.09598	34.60799
131061	5307685	1	6	NO	4.39	22.7	2.61063326181724	2.93276993986239	6.987825114869	1525194348.95865	FALSE	1.54600882530212	1.68862765793531	0.856187526563665	0.554	0.39483168645983	0.255	1.55550982934867	1525194348.14664	0.812004566192627	1.92	0.393780847157055	0.725802815403274	0.8938	0	9.26745325374266	18.99735124464420	2.04333	0.43454	21.47522	0.01863	0.01648	0.04720	46.55	10.1344	0.06543	3.83129	1.05271	0.26200	78.15832
135867	5510613	1	6	NO	5.22	16	2.06102821487448	1.67175472846111	6.20876843823445	1529168168.34641	FALSE	1.22300934791565	1.68521051649119	0.656001703085268	0.536	0.479588978364058	0.392	0.991761136702488	1529168167.8574	0.489003896713257	2.03	0.4779485092292	0.654262314633398	1.3379	0.428974918776676	6.75771827031472	23.91749927688220	2.42302	1.29505	27.63557	0.02402	0.02079	0.03398	86.64	37.7054	0.06114	7.45001	1.35468	0.26161	151.98022
135335	5485531	1	6	NO	4.24	5	1.42065673435186	1.06522874964383	6.41266475395817	1528742891.34932	TRUE	0.845001935958862	1.68124672133417	0.514529740318227	0.609	0.604383917457741	0.715	0.768917068664705	1528742890.79332	0.55600118637085	1.38	0.140624042598984	0.422314611302505	0.7596	0.832151658806469	5.86767542855577	34.4542199283025	4.51944	6.23577	45.20943	0.02545	0.01940	0.05822	35.43	10.6877	0.03908	4.47681	2.21615	0.19499	91.32691
133839	5422220	1	6	NO	4.01	3	1.79336473361601	1.59090120391651	5.9729622229429	1527472641.06046	TRUE	1.06701970100403	1.68072316933653	0.475259015416749	0.445	1.01931418426208	0.955	0.270514887508537	1527472640.54845	0.512009382247925	0.53	0.244309565804682	0.307306181696063	0.6002	0.397706669398318	5.12149475751263	27.26824331701800	1.91505	8.80919	37.99249	0.03113	0.02234	0.06907	5.62	7.2468	0.01122	2.49288	1.86238	0.13682	50.85475
131061	5307681	1	6	NO	4.39	22.7	1.45127816044841	1.11905047404157	8.19756937001215	1525195966.15788	TRUE	0.867992877960205	1.67199316641737	0.648593217694119	0.747	0.442678521252551	0.510	0.421800872844877	1525195965.79088	0.366997241973877	1.15	0.409455910282708	0.232250549131083	0.6328	0	6.40012092895437	33.1734056363397	6.62573	3.08650	42.88563	0.01518	0.01174	0.05292	37.07	11.2399	0.02521	4.47054	2.10224	0.16011	91.19904
146255	5940306	1	6	NO	5.34	24.95	1.92359570248309	1.54937032291858	7.08701822737182	1538680885.61637	FALSE	1.1542501449585	1.66653277964479	0.928305612515253	0.804	0.288813589009939	0.250	0.767445710563744	1538680884.9384	0.677971839904785	1.13	0.340042700953167	0.348097312999527	0.5134	0.791297165903869	7.72269425182664	24.7836351876946	5.77191	0.55869	31.11423	0.01959	0.01560	0.03451	19.47	4.0050	0.01529	2.67579	1.52521	0.09609	54.58618
135335	5485537	1	6	NO	4.24	5	1.5196246730586	1.06880720960661	5.57137383863507	1528746537.32094	TRUE	0.91200852394104	1.66623955058214	0.718708685011545	0.788	0.208602712310742	0.229	0.813495381438884	1528746536.86493	0.45600414276123	1.78	0.18124120030711	0.318010564832439	0.6974	0.57714918704448	5.41721882768076	31.3554620604266	7.01369	0.59085	38.96000	0.03136	0.02524	0.05415	71.89	10.9854	0.05759	5.97210	1.90980	0.25399	121.83081
146057	5933572	1	6	NO	5.1	8.17	1.95462195239215	1.5399096533847	6.41918872844201	1538447154.83389	FALSE	1.17901039123535	1.65784963976791	0.938038310103724	0.796	1.00203732306292	0.850	1.87905055031763	1538447154.11088	0.7230064868927	2.60	0.999223758530979	0.693033086255029	0.9585	0	8.20699304439336	24.01097913950320	5.53000	6.31033	35.85131	0.02810	0.01882	0.04452	96.22	13.0894	0.08325	7.11596	1.75742	0.29083	145.16560
131567	5328485	1	6	NO	3.8	1.5	1.38274969750327	0.997450610177013	4.16615246757775	1525651414.56248	TRUE	0.835000276565552	1.65598711319075	0.398075304988224	0.477	0.420277982025071	0.503	1.80389215560354	1525651413.62848	0.934000492095947	1.93	0.66384991248941	0.845662993087216	0.9054	0	5.27271281204363	33.8270800369454	2.80355	3.12500	39.75563	0.05240	0.04458	0.06298	41.14	9.0405	0.08892	4.40841	1.94881	0.30184	89.93162
146057	5933581	1	6	NO	5.1	8.17	2.42936955720945	2.43887849322631	6.946078033625	1538448285.58993	FALSE	1.468017578125	1.65486407888407	0.907552459422181	0.618	0.434687205889419	0.296	1.51813082842615	1538448283.0429	2.54703044891357	0.60	0.40182611194992	0.702363363285445	0.2758	5.62595940828257	2.44541551806227	19.2145681032715	2.68156	0.61517	22.51130	0.01877	0.01602	0.03481	1.44	0.3075	0.00468	1.18899	1.10349	0.10258	24.25546
148052	6018061	1	6	NO	4.51	5	1.85916387697263	1.27597932620612	5.26640123027472	1540522672.27428	FALSE	1.1336715221405	1.63994935099218	0.826104359668918	0.729	0.464669369140689	0.410	0.943634661728509	1540522671.5175	0.756780624389648	1.25	0.46276356491555	0.450146316814959	0.5948	0	5.06985550294166	24.4349164280317	4.82442	1.52638	30.78572	0.03448	0.02736	0.04701	21.16	4.8154	0.02648	2.78246	1.50910	0.14454	56.76209
131629	5330579	1	6	NO	4.94	7.4	1.43673881163379	1.04339433307761	7.89398137224371	1525751272.82973	TRUE	0.879011154174805	1.63449440295506	1.03383418791985	1.176	0.272565397394552	0.310	1.09499142260645	1525751272.28472	0.54500675201416	2.01	0.272009621208305	0.778042977089799	1.4276	1.1714185988095	8.07538980888506	31.3047121054273	16.20899	1.12667	48.64036	0.01880	0.01210	0.04800	76.29	38.5158	0.07024	8.01194	2.38433	0.26130	163.44358
131567	5328503	1	6	NO	3.8	1.5	1.52821100607571	1.05718045996672	2.35034940784264	1525650585.24484	TRUE	0.935001134872437	1.63444829003786	1.24100710490584	1.327	0.492551328037327	0.527	1.02713659301783	1525650584.35584	0.88900089263916	1.16	0.490483271770871	0.961979508309642	1.0821	0.744899042518317	3.61927405702681	29.4284546463926	19.40660	3.05706	51.89211	0.24063	0.13647	0.09206	15.47	13.5663	0.04897	3.96690	2.54373	0.28006	80.92476
131567	5328515	1	6	NO	3.8	1.5	2.33964431535762	2.38622950285552	4.18515010697829	1525652850.50526	FALSE	1.43500161170959	1.63041232585815	1.25254963632963	0.873	0.675347417232459	0.471	1.68887921178328	1525652849.83826	0.667000532150269	2.53	0.671445040905063	0.494507330320632	0.7414	1.00401340142321	5.99680871114206	19.08005998416670	5.46852	1.58977	26.13835	0.05867	0.04283	0.07117	99.00	8.4880	0.13603	6.55054	1.28129	0.53294	133.63104
131061	5307671	1	6	NO	4.39	22.7	1.88312880232181	1.43950493010737	6.42565772596537	1525196694.4112	FALSE	1.15698218345642	1.62762126266808	0.88586226400029	0.766	0.375307339892527	0.324	0.590983499235282	1525196694.02221	0.388993978500366	1.52	0.410491505606244	0.256777058531488	0.6601	0	6.45432315378568	23.58398895805200	5.21903	0.93677	29.73978	0.02283	0.01811	0.04892	61.12	11.5377	0.04018	5.01932	1.45783	0.22504	102.39415
135335	5485534	1	6	NO	4.24	5	1.39263844239314	1.01759657141507	4.61173956484822	1528744351.83383	TRUE	0.856007814407349	1.62689921628499	0.539504710325214	0.630	0.464339848771049	0.542	0.864667807022335	1528744351.41082	0.423003911972046	2.04	0.460760614117059	0.361926198024075	0.8556	0	5.35583628153711	31.8478995852935	4.77963	3.54059	40.16812	0.04429	0.03512	0.05240	101.74	17.8256	0.07708	7.83021	1.96903	0.31135	159.73628
135868	5510737	1	6	NO	4.93	10	2.4601957129606	2.52464088578357	6.50418800647714	1529120727.25693	FALSE	1.51300597190857	1.62603172666741	0.891917924679961	0.590	0.431251423323234	0.285	0.909946305868646	1529120726.88992	0.367001533508301	2.48	0.443674006100051	0.48295894492054	1.3160	0.600089410201015	6.63578818336264	17.9992584429629	2.36573	0.55307	20.91805	0.02050	0.01764	0.03568	172.53	48.6020	0.09148	11.86521	1.02539	0.51295	242.05024
149002	6057072	1	6	NO	4.81	10.4	2.28026839682993	2.1049288725801	7.32170954960955	1541733384.69695	FALSE	1.4130072593689	1.61376976778476	0.740910707363905	0.524	0.24523166558847	0.174	1.00323910515693	1541733384.15195	0.545002937316895	1.84	0.225127399601018	0.579043047063644	1.0625	0.31278012371915	7.5858482605249	18.9834866843969	2.00418	0.21956	21.20722	0.01531	0.01371	0.03549	64.04	21.3335	0.05510	5.22453	1.03957	0.24712	106.58048
135335	5485530	1	6	NO	4.24	5	2.38444869210524	2.56841621599062	5.64967760850764	1528742841.89121	FALSE	1.47900319099426	1.61219982933390	0.971061602711702	0.657	0.587211465855347	0.397	1.24581302089333	1528742841.21321	0.678001403808594	1.84	0.582150300581604	0.528755100047564	0.7799	0	7.48911117400138	18.10113700022280	3.00209	1.09779	22.20101	0.02818	0.02298	0.05004	51.29	9.2396	0.06254	4.05553	1.08829	0.27196	82.73283
135867	5510572	1	6	NO	5.22	16	2.23349013571342	2.16517128142258	6.89162711795644	1529169379.69441	FALSE	1.39000582695007	1.60682069989168	0.915795864170092	0.659	0.52486161765851	0.378	0.589021022625001	1529169379.3164	0.37800145149231	1.56	0.521269540232818	0.182885050690958	0.4838	0.81175267678049	6.40674576600052	19.13178270830320	3.21651	1.05652	23.40481	0.01877	0.01534	0.03271	66.16	6.3784	0.02757	4.70327	1.14729	0.17056	95.94672
135335	5485525	1	6	NO	4.24	5	2.19582826657465	1.83122361924706	4.63578963252019	1528745211.92992	FALSE	1.36798715591431	1.60515269246592	0.535957713511707	0.392	0.311843106145187	0.228	0.856445446503284	1528745211.54093	0.388996124267578	2.20	0.212556199913118	0.490439591401388	1.2608	0	5.00207312926091	19.39938258660630	1.15572	0.39126	20.94636	0.03653	0.03383	0.04367	128.35	42.0894	0.10104	9.38173	1.02678	0.51246	191.38719
131062	5307696	1	6	NO	4.41	5	1.65069904335684	1.23914331766244	5.91047648904607	1525055416.52386	TRUE	1.03399395942688	1.59643006451584	0.453509303608536	0.439	0.486853714594453	0.471	0.921570021747352	1525055416.06786	0.455997228622437	2.02	0.389137482136056	0.549664364712676	1.2054	1.01113181613002	5.67800669568695	25.38744637223760	1.91627	2.20841	29.51212	0.02393	0.02059	0.04299	92.26	32.8205	0.08035	7.57801	1.44667	0.32449	154.59136
131567	5328506	1	6	NO	3.8	1.5	1.68439414415388	1.25855488842786	4.46055216478437	1525650800.00607	TRUE	1.0570011138916	1.59355947880924	0.648425450695445	0.613	0.603747649427968	0.571	1.53571774182146	1525650799.27207	0.73400092124939	2.09	0.602916650948028	0.77029923392829	1.0495	0.727458087202512	5.49906106760969	24.7456197775218	3.66717	3.17923	31.59202	0.04598	0.03602	0.06336	61.43	15.4549	0.10707	5.31742	1.54863	0.36861	108.47547
133415	5404234	1	6	NO	4.91	1.9	1.52495851617829	1.07781519807358	6.92070338064079	1527223129.8517	TRUE	0.956996202468872	1.59348439653593	0.648993502376858	0.678	0.359387677246352	0.376	0.316633956144177	1527223129.55171	0.299998998641968	1.06	0.120178193709677	0.295598452746509	0.9853	0	8.10013469199219	27.3289307827598	4.94980	1.51786	33.79659	0.01850	0.01496	0.03676	38.25	33.3336	0.02440	5.16553	1.65670	0.15053	105.37678
146255	5940318	1	6	NO	5.34	24.95	1.99559046181829	1.41589998342037	7.06746470391123	1538679593.52907	FALSE	1.25698900222778	1.58759580098273	0.747144827814357	0.594	0.444870250338203	0.354	1.08446783007632	1538679592.91807	0.610994815826416	1.77	0.390632525998993	0.582887710966385	0.9540	0.773981344547884	6.48210569487347	20.65311816981590	2.89503	1.02638	24.57453	0.01694	0.01424	0.02968	53.11	15.3424	0.04018	4.56004	1.20463	0.16695	93.02473
134536	5451133	1	6	NO	4.98	34	1.337841326104	0.959173245284061	7.17028988239803	1528150887.80393	TRUE	0.844992637634277	1.58325796760733	0.908476186683339	1.075	0.246180330287621	0.291	0.556284513352322	1528150887.43693	0.366996765136719	1.52	0.245036141493505	0.334846258760061	0.9124	0	6.9051877586558	30.5553782454296	14.08982	1.03463	45.67983	0.02057	0.01376	0.04264	64.48	23.3637	0.03562	6.54541	2.23921	0.17878	133.52641
131567	5328482	1	6	NO	3.8	1.5	1.43341046241347	1.07967688701059	5.07935213302353	1525652136.82597	TRUE	0.911993980407715	1.5717323723701	0.768537997009278	0.843	0.675977400132555	0.741	1.3492933302609	1525652136.13698	0.688995361328125	1.96	0.67354554415437	0.361727001002066	0.5250	0.832115371016114	5.40055865382854	27.8998873296215	8.02033	6.20477	42.12498	0.04080	0.02702	0.07289	57.33	4.1205	0.08033	5.07735	2.06495	0.31463	103.57801
131567	5328497	1	6	NO	3.8	1.5	1.7249096389517	1.20646963805487	3.54362704143101	1525651335.18812	TRUE	1.10000586509705	1.56809131085816	0.412688603660595	0.375	0.578055048086969	0.526	1.54664427023784	1525651333.96412	1.22400665283203	1.26	0.529815174440611	0.567275683736373	0.4635	0.563616575771578	5.22957445335209	23.0242196912384	1.31794	2.58577	26.92794	0.06463	0.05526	0.05620	13.44	1.8075	0.03540	2.06722	1.32000	0.18595	42.17132
131062	5307698	1	6	NO	4.41	5	1.33954006783229	0.991262293108934	5.16215848658982	1525054465.94686	TRUE	0.856995820999146	1.5630648773416	0.460287469911452	0.537	0.407535141562768	0.476	1.31876339992793	1525054464.89087	1.05599474906921	1.25	0.404895804107981	0.546727050720732	0.5177	0.656353835567711	5.57586416930992	29.3638183925845	3.46704	2.71789	35.54875	0.03132	0.02587	0.04292	15.21	2.6145	0.02652	2.61643	1.74259	0.14384	53.37525
146057	5933577	1	6	NO	5.1	8.17	1.98321676275047	1.6027955596793	6.85653675493157	1538446673.46859	FALSE	1.27901530265808	1.55058094975791	0.549203204607204	0.429	0.459261371496276	0.359	1.01112224917462	1538446672.95658	0.512006282806396	1.97	0.176723156251881	0.835184763638139	1.6312	0.734889060352619	7.00466886868372	19.36200696784570	1.48483	1.03832	21.88515	0.01631	0.01443	0.02948	78.45	53.5274	0.07118	7.54251	1.07280	0.29028	153.86724
135868	5510674	1	6	NO	4.93	10	1.85108932213704	1.3269133631558	6.54535883316261	1529121510.24059	FALSE	1.20102000236511	1.54126435737272	0.854211683411044	0.711	0.616537398253466	0.513	0.941390879547716	1529121509.90658	0.33400559425354	2.82	0.613889042701309	0.684345688530226	2.0489	0.553240235218361	6.68433653515584	20.37235590638360	4.33828	2.25998	26.97062	0.02071	0.01565	0.03651	244.97	129.4575	0.14097	19.67646	1.32209	0.69455	401.39981
145485	5910623	1	6	NO	4.44	3.31	1.65325187985911	1.17333857915291	5.0369215395377	1537901532.30915	TRUE	1.07900857925415	1.53219530562203	0.436683308833164	0.405	0.232573143524429	0.216	1.22205091247065	1537901531.80915	0.500004053115845	2.44	0.241329931685352	0.586175504709442	1.1723	0.618066024698745	5.01493546058268	22.40993421830560	1.56349	0.44349	24.41691	0.02845	0.02611	0.03661	123.05	28.3121	0.10518	8.61681	1.19691	0.38575	175.78287
145293	5902835	1	6	NO	4.13	1.5	1.75744878805178	1.29972040081074	6.6473297343747	1537675694.61823	TRUE	1.15699744224548	1.51897378843030	0.757827058713777	0.655	0.32153586024445	0.278	0.640603570806305	1537675693.97323	0.644998550415039	0.99	0.0948978359888	0.385262616422906	0.5973	0	5.49569852513339	20.54023392155630	3.81927	0.68754	25.04704	0.01797	0.01474	0.04655	15.75	5.6974	0.02222	2.27924	1.22780	0.13458	46.49656
131629	5330573	1	6	NO	4.94	7.4	2.12419359754576	1.69868034432414	6.31798541711486	1525751979.30218	FALSE	1.40095210075378	1.51624998199642	0.868949881819472	0.620	0.438994258097364	0.313	0.26204113638442	1525751978.9012	0.400986194610596	0.65	0.352742034179787	0.211271460643039	0.5269	0.62040788569539	5.30534262152596	16.90267944826360	2.82850	0.72191	20.45310	0.01967	0.01625	0.03217	10.97	7.1307	0.00815	1.88987	1.00260	0.07799	38.55330
131567	5328503	1	6	NO	3.8	1.5	1.78092254123233	1.30495365327363	5.20509806506279	1525650580.79684	TRUE	1.17900133132935	1.51053480085922	0.779087612307317	0.661	0.791162678084361	0.671	1.58749891950665	1525650580.15184	0.645000696182251	2.46	0.787524519783201	0.521530017460176	0.8086	0	5.71388323852091	19.93353852701030	3.81476	3.93392	27.68222	0.03300	0.02377	0.06192	96.73	10.4404	0.13116	6.61066	1.35697	0.46670	134.85756
131567	5328480	1	6	NO	3.8	1.5	4.12448668982804	8.85287479522097	4.06133035256588	1525651778.21339	TRUE	2.74698162078857	1.50146133436598	1.0147555768688	0.369	0.840015264466571	0.306	2.52725170383721	1525651775.8114	2.40198373794556	1.05	0.832881178955	0.765502064517431	0.3187	2.69837812518985	4.33815432301041	8.45297873557441	0.51167	0.35063	9.31528	0.04250	0.03857	0.04855	4.75	0.4355	0.02362	0.71068	0.45663	0.14163	14.49786
133413	5404175	1	6	NO	4.19	0.5	2.49883104381893	2.47245757080051	4.9695847474789	1527284417.95409	FALSE	1.67902755737305	1.48826088818251	0.882979930697305	0.526	0.533040476620678	0.317	1.30722779917531	1527284417.32008	0.634010314941406	2.06	0.590892955824459	0.679059125384384	1.0711	0.185767327171996	5.97397057102404	13.58743681969080	1.69655	0.61828	15.90226	0.02962	0.02531	0.04167	69.06	18.6365	0.08677	5.07856	0.77952	0.37397	103.60257
135867	5510558	1	6	NO	5.22	16	2.29230076414579	2.14104367393069	7.66742423917738	1529173010.50813	FALSE	1.56798362731934	1.46194177299208	0.581748694700876	0.371	0.477337549346785	0.304	1.86638792340053	1529173009.56314	0.944989919662476	1.98	0.257575881321696	0.966547171466194	1.0228	0	8.49372008089853	14.03963613964100	0.90424	0.60878	15.55266	0.01136	0.01026	0.02452	42.52	11.4025	0.05123	3.40549	0.76239	0.17553	69.47190
146057	5933582	1	6	NO	5.1	8.17	1.84971099776903	1.56991922560721	6.77176338283306	1538449263.57666	FALSE	1.26801514625549	1.45874519183096	1.03082248231149	0.813	0.980330021036246	0.773	1.8161269078191	1538449262.77565	0.801009654998779	2.27	0.972547102679268	0.748506229947248	0.9345	0.351863662301012	7.95940644342353	17.28509053857170	5.36824	4.85522	27.50854	0.02084	0.01309	0.03674	66.10	11.2283	0.06525	5.13917	1.34846	0.22848	104.83913
133839	5422005	1	6	NO	4.01	3	1.78878660639183	1.40279270774766	7.20849260801049	1527471798.04489	TRUE	1.23504114151001	1.44836195837556	0.660938482384127	0.535	0.350903051369209	0.284	0.164564715284016	1527471797.65588	0.389013051986694	0.42	0.040154282471118	0.216313768318608	0.5561	0.137024232631991	6.4110124711378	17.49484175646030	2.38844	0.67324	20.55652	0.01339	0.01139	0.04326	4.74	8.1868	0.00857	1.64125	1.00767	0.09265	33.48155
133839	5422027	1	6	NO	4.01	3	1.73784759992436	1.28587987555683	5.32625863979016	1527471854.82064	TRUE	1.20102453231812	1.44697094285835	0.766753846845465	0.638	0.294645331849208	0.245	0.917328094225058	1527471854.31963	0.501010179519653	1.83	0.29250960519042	0.349365185222313	0.6973	0.262855080426246	5.09060538448464	17.95580855120670	3.49537	0.51616	21.96734	0.02548	0.02083	0.04495	68.92	9.9967	0.06737	4.94531	1.07683	0.29256	100.88431
133839	5422005	1	6	NO	4.01	3	1.73477448424179	1.2435571414539	4.68188955614143	1527471806.75318	TRUE	1.20104002952576	1.44439356024360	0.344127427206439	0.287	0.479743539068094	0.399	1.37363991136324	1527471806.29717	0.456015348434448	3.01	0.477586511764951	0.599258958672692	1.3141	0	5.13594369075874	17.89166794405570	0.70405	1.36831	19.96402	0.02997	0.02686	0.04085	204.95	39.0057	0.18954	12.93716	0.97863	0.74512	263.91816
145873	5926003	1	6	NO	4.82	12.7	2.24173860008907	1.95956708153482	4.15965750018432	1538280180.34093	FALSE	1.59100937843323	1.40900401372659	0.496343894235695	0.312	0.646837942231956	0.407	1.37228092287241	1538280179.80693	0.534003257751465	2.57	0.526079284943735	1.01635418915633	1.9033	0.158234196937612	6.34910651318008	12.85253944909030	0.63006	1.07006	14.55267	0.03666	0.03238	0.02730	127.38	69.8708	0.12421	10.38238	0.71337	0.53076	211.80062
131567	5328516	1	6	NO	3.8	1.5	1.93672573017125	1.28417213569744	3.12855430312987	1525653088.94952	FALSE	1.37900137901306	1.40444074940472	0.856020063465512	0.621	0.783880434399316	0.568	1.29694491588977	1525653088.39352	0.556000709533691	2.33	0.782123067496473	0.209481176011567	0.3768	0.303237311366802	4.45492044666166	14.73259899565990	2.87813	2.41347	20.02421	0.07729	0.05687	0.05239	100.80	2.6297	0.10911	6.05159	0.98158	0.45323	123.45242
133413	5404177	1	6	NO	4.19	0.5	1.82396829581705	1.18236217526662	1.10353993698956	1527285356.70542	TRUE	1.31202125549316	1.39019721531223	0.665197108925599	0.507	0.482216439932207	0.368	0.630363486393049	1527285354.76939	1.93603181838989	0.33	0.286543876422361	0.677206799520688	0.3498	0.128001113717485	4.35630730483617	15.17222177652530	2.01797	1.06047	18.25067	0.53870	0.44784	0.03737	0.56	0.6509	0.00367	0.95420	0.89464	0.09867	19.46561
146057	5933584	1	6	NO	5.1	8.17	2.0161417010173	1.63710848500916	5.53903175968467	1538450387.14114	FALSE	1.45701742172241	1.38374577473063	0.770841410598126	0.529	0.446205869156308	0.306	0.55631577215122	1538450386.75113	0.390004634857178	1.43	0.479455500528249	0.190284674830535	0.4879	0	5.84795859125029	13.5358363651273	1.97867	0.66300	16.17751	0.02105	0.01761	0.02483	53.74	6.2869	0.02466	3.73535	0.79301	0.14825	76.20105
148052	6018085	1	6	NO	4.51	5	2.15230822518568	1.5608515486701	4.43932982717047	1540520673.46247	FALSE	1.55701375007629	1.38233090432260	0.957656987558496	0.615	0.3395541188856	0.218	1.89084580399451	1540520672.70546	0.757006645202637	2.50	0.336860082671043	0.6633410140872	0.8763	0.0306026038977851	5.87086675165538	12.64063269075340	2.50253	0.31461	15.45778	0.03346	0.02736	0.03242	84.89	10.4475	0.09721	5.43108	0.75773	0.34533	110.79406
134536	5451087	1	6	NO	4.98	34	1.75135437821922	1.31139799058848	4.26353732827132	1528151777.17492	TRUE	1.26797866821289	1.38121754105501	0.551560211976319	0.435	0.523873017872317	0.413	1.64699145809208	1528151775.01696	2.157963514328	0.76	0.314523267845994	0.721017408859445	0.3341	1.79167634336357	4.37223867755025	15.49706475235180	1.53705	1.38661	18.42072	0.03520	0.02962	0.02580	2.78	0.5328	0.00790	1.06538	0.90298	0.08226	21.73383
131062	5307699	1	6	NO	4.41	5	2.50511906363156	2.94722624176937	5.63687270514371	1525054577.80631	FALSE	1.83499097824097	1.36519421258026	0.775632948959724	0.423	0.489114162771843	0.267	1.37108835089846	1525054577.11731	0.688996553421021	1.99	0.514545739755495	0.392582834659252	0.5698	3.07750798889154	4.20145827226098	10.46145685710520	1.00288	0.39880	11.86314	0.01877	0.01655	0.03067	59.20	4.8534	0.06217	3.72137	0.58153	0.26993	75.91592
133415	5404232	1	6	NO	4.91	1.9	1.85765146936412	1.38456096114064	5.88130959222748	1527222804.94396	FALSE	1.37899446487427	1.34710581998855	0.62644784296341	0.454	0.312296226780226	0.226	0.796061068195261	1527222804.60997	0.333998918533325	2.38	0.352682720174416	0.481139780092813	1.4405	0	6.37294258051182	13.55433223674940	1.54141	0.38307	15.47882	0.01691	0.01480	0.02426	175.18	63.9948	0.09078	12.48322	0.75877	0.49574	254.65776
131061	5307684	1	6	NO	4.39	22.7	1.41695184634292	1.07003749081319	9.26922332162791	1525196782.03635	TRUE	1.0779914855957	1.31443695546437	0.488136308165764	0.453	0.472584311782857	0.438	0.419781563744706	1525196781.24636	0.789993524551392	0.53	0.277852713402136	0.301484135405947	0.3816	1.81766866732625	7.80750147345659	16.5082643876705	1.95918	1.83633	20.30377	0.00698	0.00567	0.03112	3.68	1.8989	0.00627	1.26883	0.99528	0.06874	25.88404
135868	5510737	1	6	NO	4.93	10	1.83300021461229	1.38249627801315	7.55594221389055	1529120721.85191	FALSE	1.4010055065155	1.30834618856797	1.13169884721759	0.808	0.493799789895123	0.352	1.36046439994698	1529120721.2849	0.567002296447754	2.40	0.331997857964022	0.62531434091983	1.1028	0.516158700948016	8.0345930751364	12.5846960159327	4.79711	0.91331	18.29512	0.01230	0.00846	0.02889	104.58	22.0943	0.08096	7.10644	0.89682	0.32160	144.97143
133839	5422005	1	6	NO	4.01	3	1.45009893074287	1.00393957832588	5.30049857551524	1527471802.06003	TRUE	1.14503812789917	1.26641977713301	0.527285334528146	0.460	0.288377684035373	0.252	1.11500344277105	1527471801.58201	0.478015899658203	2.33	0.249783509694023	0.697001699359185	1.4581	0	6.17565953074286	14.42688748279390	1.90752	0.57056	16.90497	0.01888	0.01611	0.03298	117.24	45.8119	0.13279	8.82124	0.82867	0.49764	179.95326
145293	5902860	1	6	NO	4.13	1.5	1.87198205120384	1.36974717666101	4.98833344352488	1537676389.79382	FALSE	1.50202989578247	1.24630145941845	0.715049008113213	0.476	0.435454870346135	0.290	0.216099779286337	1537676388.6368	1.15702319145203	0.19	0.0532068687565476	0.216747082951811	0.1873	2.362746860423	1.14636035775408	10.65135489029380	1.55408	0.57635	12.78179	0.02114	0.01761	0.03084	0.31	0.3124	0.00116	0.65709	0.62656	0.05725	13.40473
133413	5404176	1	6	NO	4.19	0.5	1.61104405444853	1.0792222007121	5.51543740078603	1527285123.73962	TRUE	1.30102133750916	1.23829180045034	0.735444825211343	0.565	0.473759979767836	0.364	2.03362110425727	1527285123.20561	0.534008502960205	3.81	0.71958963176548	1.11027155773963	2.0791	2.00137998309089	4.08589321480031	12.13944410456910	2.52979	1.04979	15.71902	0.01842	0.01422	0.03191	279.73	83.3779	0.30259	18.56975	0.77054	1.08482	378.82292
145735	5920278	1	6	NO	5.22	6.7	1.6118737889203	1.0839775973446	7.4361998833257	1538192049.04555	TRUE	1.31201648712158	1.22854690069983	0.632003454774452	0.482	0.281378628421571	0.214	0.542114868444842	1538192048.51154	0.534006834030151	1.02	0.272293836983127	0.383720173241305	0.7186	0.194373186430844	7.09308422350499	11.8489921970902	1.82162	0.36108	14.03169	0.00912	0.00770	0.01851	19.88	9.9592	0.01602	2.15045	0.68783	0.08143	43.86924
146255	5940323	1	6	NO	5.34	24.95	2.04001378707654	1.71734377271528	7.05856740828848	1538681091.861	FALSE	1.6799852848053	1.2143045570265	1.18630117316087	0.706	0.506248586433408	0.301	0.945749260153048	1538681091.10501	0.755993604660034	1.25	0.354923083516711	0.495269284621165	0.6551	1.14754016764701	7.12699230671866	9.04038647045531	3.05711	0.55673	12.65423	0.01169	0.00835	0.02043	21.32	5.8474	0.01973	1.95216	0.62031	0.09321	39.82401
131061	5307682	1	6	NO	4.39	22.7	2.02086631638504	1.60891804633488	8.50554451679372	1525196229.86377	FALSE	1.66798663139343	1.21156025974670	0.947023128674223	0.568	0.194691393694143	0.117	0.412281674823361	1525196229.59677	0.266997814178467	1.54	0.192007133447028	0.152753748263402	0.5721	0	9.15846882204913	9.06430892449280	1.99058	0.08413	11.13902	0.00704	0.00573	0.02641	91.98	12.6269	0.03971	5.67391	0.54603	0.31840	115.74781
131629	5330580	1	6	NO	4.94	7.4	2.03341384261546	1.57317225927332	2.88921461503583	1525751397.13729	FALSE	1.67902112007141	1.21107103317972	0.798370847210661	0.475	0.685097291360638	0.408	1.77193038018832	1525751396.35928	0.778009653091431	2.28	0.714703138375311	0.913566048540557	1.1742	0.517824529448087	5.67378201266176	8.99746775528919	1.38701	1.02135	11.40582	0.06285	0.04958	0.02150	68.67	18.2542	0.07593	4.82016	0.55911	0.27124	98.33134
146255	5940323	1	6	NO	5.34	24.95	1.49064522065443	1.06406494763977	7.31434998351629	1538681089.84802	TRUE	1.25698900222778	1.18588565056062	1.0259630063329	0.816	0.560495762338883	0.446	1.56708701957766	1538681089.01402	0.833992719650269	1.88	0.5571027909826	0.736485205352122	0.8831	0	9.01276493852907	11.52368490833670	5.45891	1.62925	18.61185	0.01198	0.00742	0.02248	43.61	9.6312	0.04266	3.52196	0.91235	0.14434	71.84804
135335	5485537	1	6	NO	4.24	5	2.07161052089647	2.0095564527603	4.26897423742109	1528746554.00309	FALSE	1.78001618385315	1.16381555386318	0.346426582692334	0.195	0.508101376850976	0.285	1.21867622280141	1528746553.41408	0.589005470275879	2.07	0.228418386254275	0.619579189699029	1.0519	0	5.17898953973653	7.83757280058175	0.21917	0.47148	8.52823	0.02282	0.02097	0.02313	74.86	19.3496	0.08457	5.03622	0.41805	0.37092	102.73892
148519	6037884	1	6	NO	5.34	24.95	1.43898544805475	1.03818952275112	7.17229453868693	1541095939.05101	TRUE	1.26584649085999	1.13677721465036	0.683773648085121	0.540	0.450332543777561	0.356	0.685253316519424	1541095938.66267	0.388339281082153	1.76	0.239079167015252	0.427065790866797	1.0997	0.926611190791473	6.45817481854467	10.51494251815960	2.37421	1.02982	13.91897	0.00938	0.00709	0.01693	82.59	32.0769	0.04278	6.30303	0.68230	0.20436	128.58173
133415	5404240	1	6	NO	4.91	1.9	2.0645772581253	1.505325624736	5.26771304001707	1527224889.41588	FALSE	1.8349928855896	1.1251145845516	0.636538758734426	0.347	0.401502718200491	0.219	0.960682568843233	1527224889.03788	0.37799859046936	2.54	0.3012167255904	0.630936639278581	1.6692	0	5.66388683329489	7.1055278931118	0.67544	0.26873	8.04969	0.01458	0.01287	0.01679	176.01	75.9169	0.10822	12.74373	0.39459	0.65381	259.97215
135867	5510553	1	6	NO	5.22	16	1.7555789932622	1.25830777244623	9.30891843590546	1529171521.61679	TRUE	1.57898354530334	1.11184122119837	0.601989480349641	0.381	0.305604849063552	0.194	0.821704144254552	1529171520.93879	0.677992820739746	1.21	0.182995813117782	0.31978935183518	0.4717	1.11843615536878	8.7937844007099	8.06390055157889	0.94816	0.24436	9.25642	0.00462	0.00403	0.01470	22.31	3.3798	0.01752	1.71328	0.45375	0.07931	34.95101
146255	5940348	1	6	NO	5.34	24.95	1.68591304781715	1.35690291064788	8.8690800484162	1538676738.9882	TRUE	1.57900047302246	1.06770902011830	0.484601612524195	0.307	1.06863137241377	0.677	0.0805271356211085	1538676738.5212	0.467000007629395	0.17	0.233399719342585	0.206953457112835	0.4432	0.41702839964488	6.26979721788323	7.43636653853325	0.61441	2.98776	11.03854	0.00607	0.00409	0.01675	0.66	4.3314	0.00224	0.78558	0.54111	0.03150	16.02578
133413	5404141	1	6	NO	4.19	0.5	1.47059428330702	1.13456489936572	5.81585783904319	1527285817.73665	TRUE	1.37900447845459	1.06641733676969	0.379789894886505	0.275	0.43801654004563	0.318	0.7480511577278	1527285817.31464	0.422001361846924	1.77	0.240697819973029	0.533982154826482	1.2654	0.483920716732865	5.64988875295811	8.49426765865590	0.56654	0.75357	9.81437	0.01096	0.00949	0.02112	76.69	39.0795	0.07624	6.15624	0.48110	0.35297	125.58733
149002	6057072	1	6	NO	4.81	10.4	1.8378845027288	1.11561654974533	5.31698755755017	1541733392.99399	FALSE	1.72400903701782	1.06605270811571	1.15677721779819	0.671	0.480333614159053	0.279	1.79617582168239	1541733391.77099	1.2230064868927	1.47	0.479620462335399	1.43710087196605	1.1751	1.12339111870075	7.16482646375616	6.78976967429414	2.68979	0.46377	9.94333	0.01661	0.01134	0.02030	18.17	11.6285	0.04315	1.94791	0.48742	0.13868	39.73743
148052	6018070	1	6	NO	4.51	5	1.98561893601182	1.47084710759091	5.73638350225532	1540525344.96176	FALSE	1.8784556388855	1.05704861744294	0.73168399925296	0.390	0.602554929136118	0.321	0.149211737182637	1540525344.4729	0.488858222961426	0.31	0.196188699769038	0.590970109251027	1.2089	0	5.96991987301984	6.1266942333011	0.83192	0.56419	7.52281	0.01177	0.00958	0.01903	1.96	30.7907	0.02157	1.97433	0.36877	0.12843	40.27638
148052	6018084	1	6	NO	4.51	5	2.28011494981547	1.42885023270557	2.95333592047304	1540520604.72886	TRUE	2.22501969337463	1.02476169384248	1.16957170796447	0.526	0.222518323916342	0.100	1.48766927823523	1540520602.94985	1.77901577949524	0.84	0.384780702475549	1.20417078567282	0.6769	0.240812046628966	5.29212578703921	4.86126315314279	1.27906	0.04630	6.18662	0.04324	0.03398	0.01854	4.05	2.6526	0.01606	0.63176	0.30327	0.06951	12.88788
133839	5422024	1	6	NO	4.01	3	1.47258825705633	0.925897867017762	3.9714757373943	1527472471.33295	TRUE	1.45601487159729	1.01138270342037	1.00020459229394	0.687	0.507506451404938	0.349	0.551959890948825	1527472470.78795	0.545005559921265	1.01	0.240633632500738	0.350842742088916	0.6437	0.140063453408079	3.63219536958056	7.23606497786265	3.33824	0.85945	11.43376	0.02892	0.01830	0.02836	19.38	7.8318	0.02527	1.89460	0.56048	0.13177	38.64979
146057	5933580	1	6	NO	5.1	8.17	1.52039631220984	0.975095606299748	2.03433652392881	1538447846.48566	TRUE	1.52401828765869	0.99762340420835	0.345131074625428	0.226	0.438770598240576	0.288	0.947420826413224	1538447845.28464	1.20101451873779	0.79	0.638490338837415	0.953605579579072	0.7940	0.572073224353891	6.74394441676487	6.72636305367326	0.34660	0.56020	7.63317	0.07701	0.06786	0.01225	5.34	5.4067	0.01359	0.90081	0.37417	0.05275	18.37661
145485	5910622	1	6	NO	4.44	3.31	1.8003238905762	1.20391915407177	5.37094290342702	1537901063.47338	TRUE	1.83501482009888	0.981095013978791	1.1841713124722	0.645	0.265373606731562	0.145	1.49823928604281	1537901062.28337	1.19000959396362	1.26	0.183129462652863	1.38224797253198	1.1615	0.858523094549249	5.8067829825878	5.40281112930871	2.33748	0.11739	7.85768	0.01369	0.00942	0.02004	13.72	11.6777	0.04200	1.63016	0.38518	0.13981	33.25521
131061	5307673	1	6	NO	4.39	22.7	1.45485169150548	1.00069438589756	7.19855040149728	1525196935.56047	TRUE	1.51297664642334	0.96158238459578	0.899348175864851	0.594	0.318412509402575	0.210	0.774456220556363	1525196935.04948	0.510992050170898	1.52	0.281633143989758	0.278477478678803	0.5450	0	7.73592283442085	6.29474291680091	2.40545	0.30152	9.00172	0.00720	0.00504	0.01936	46.30	5.9865	0.03798	3.00437	0.44126	0.17635	61.28905
146255	5940321	1	6	NO	5.34	24.95	1.58490029634931	1.03231717855125	6.26606342803234	1538680173.11401	TRUE	1.66798543930054	0.95018832839088	0.758114731375461	0.455	0.205796191728301	0.123	1.21001825698198	1538680172.36902	0.744993448257446	1.62	0.169661146670691	0.69837526772177	0.9374	0.727463116110271	6.63744803245883	5.57525007881682	1.27565	0.09400	6.94490	0.00808	0.00649	0.01113	36.47	12.1495	0.03480	2.72386	0.34044	0.12882	55.56672
148052	6018077	1	6	NO	4.51	5	1.73929541193499	1.10698221134385	4.46202553306402	1540523871.30081	TRUE	1.93498086929321	0.89886956482950	0.494517965478637	0.256	0.454010474721711	0.235	0.737135132153758	1540523870.85581	0.444995641708374	1.66	0.217381186598445	0.409991990096683	0.9213	0.449456496666304	4.68598013503301	4.30084608391013	0.34767	0.29305	4.94157	0.01316	0.01145	0.01288	63.51	19.6481	0.04985	4.31877	0.24223	0.28243	88.10290
145293	5902861	1	6	NO	4.13	1.5	1.3165303878819	0.840143554224633	4.93129195272951	1537676454.42311	TRUE	1.63503265380859	0.805201281341518	0.796026842545961	0.487	0.285770638963639	0.175	0.856633084215013	1537676453.24409	1.1790235042572	0.73	0.245428214448228	0.795048598557142	0.6743	0.792144478726275	6.06641775328676	4.08431950898775	1.49318	0.19244	5.76994	0.01063	0.00752	0.01515	4.61	3.9724	0.01626	0.70363	0.28284	0.06488	14.35406
146057	5933578	1	6	NO	5.1	8.17	1.74790180231386	1.17594202246002	4.62338585484598	1538446821.00536	TRUE	2.19102644920349	0.79775477057764	0.754085744357554	0.344	0.212026038341857	0.097	0.0196311419685545	1538446820.69335	0.312003612518311	0.06	0.0357426687883219	0.0774293390969401	0.2482	0	1.91872743104705	2.99177152533715	0.55685	0.04402	3.59264	0.01009	0.00840	0.00829	0.13	2.0332	0.00071	0.28218	0.17611	0.01518	5.75648
133839	5422024	1	6	NO	4.01	3	1.30913899357844	1.09523186290969	4.495199389353	1527472468.04092	TRUE	1.74601769447327	0.74978563947107	0.41516344296031	0.238	0.51546248563685	0.295	0.248846803270624	1527472467.39591	0.645006656646729	0.39	0.447113901927676	0.134287246575665	0.2082	0.875400649392636	2.52495489015423	3.31636879823508	0.33353	0.51414	4.16404	0.00986	0.00785	0.01239	2.38	0.6922	0.00337	0.35456	0.20412	0.02947	7.23310
145485	5910625	1	6	NO	4.44	3.31	1.74049755256304	1.31630975279119	5.07881720330052	1537902420.20329	TRUE	2.46901988983154	0.70493460167378	0.519443528976499	0.210	0.458158672568879	0.186	0	0	0		0	0		0	0	2.07305246314158	0.18465	0.14365	2.40135	0.00630	0.00544	0.00824				0.11771	0.11771	0.00824	2.40135
128969	5213110	1	6	NO	4.58	25.0	2.3276815065219	3.9150587123902	5.1744918763271	1523502931.1137	FALSE	0.58899998664856	3.95192115328648	0.80709122485385	1.370	0.68312212103528	1.160	1.9106846375335	1523502930.0897	1.0239996910095	1.87	0.68065727455381	0.78404096638755	0.7657	0	6.7382476620322	273.110553318996	32.83497	23.52275	329.46827	0.19856	0.16460	0.25346	35.02	5.8968	0.05472	18.15613	16.15041	0.78030	370.38503
130094	5263018	1	6	NO	4.71	6.5	2.7326029196834	6.2733767767345	5.6883392889237	1524455322.9847	FALSE	0.72298097610474	3.77963322687418	1.2810347141456	1.772	0.98648364095846	1.364	2.4647581743071	1524455321.9727	1.0119733810425	2.44	0.9816728654261	0.90561017088113	0.8949	0	6.5178699507433	203.521207831206	44.72789	26.52384	274.77294	0.16820	0.12459	0.24534	60.38	8.1510	0.08565	16.82853	13.46926	0.73558	343.30195
128969	5213110	1	6	NO	4.58	25.0	2.5550523945875	5.6501689259363	4.6381750159941	1523502924.0407	FALSE	0.7119996547699	3.5885584739690	1.2614563142488	1.772	0.62125435480689	0.873	1.867341827766	1523502922.4507	1.5899996757507	1.17	0.61720627073554	0.70889151321088	0.4458	0.23701873726608	7.7110538713208	186.2934116592220	45.40904	11.01379	242.71624	0.22009	0.16892	0.22571	8.93	1.2877	0.02123	12.39897	11.89785	0.76050	252.93890
130094	5263017	1	6	NO	4.71	6.5	2.3413160617018	3.6583423293833	5.5450736209867	1524454938.0818	FALSE	0.7559802532196	3.0970598130447	0.98780931203247	1.307	0.49527728511219	0.655	1.116792119702	1524454937.2809	0.80097889900208	1.39	0.51966263112576	0.45861136338283	0.5726	0.56002867885296	5.7956377223791	130.6850652258260	23.26227	5.84794	159.79527	0.10764	0.08803	0.14919	25.00	4.2156	0.02890	9.26518	7.83310	0.36343	189.00969
128969	5213126	1	6	NO	4.58	25.0	2.5395817908578	4.0445224266387	5.7764653493209	1523502205.0902	FALSE	0.84502005577087	3.00535090677944	0.87485308248958	1.035	0.21024813514039	0.249	0.89083577823894	1523502204.2782	0.81201934814453	1.10	0.22771205954056	0.39144134398923	0.4821	1.2730138096445	5.9847073597305	110.093222421563	13.06491	0.75457	123.91270	0.08597	0.07639	0.13676	15.27	2.9476	0.01932	6.96699	6.07415	0.30760	142.12661
128121	5179687	1	6	NO	4.4	6.7	2.1184426464322	2.2129146032202	6.055413167626	1522816248.6403	FALSE	0.72194647789001	2.93434861352	0.87863492991141	1.217	0.49155941670053	0.681	1.9565410983415	1522816247.8174	0.82293891906738	2.38	0.43979453565198	0.83584268916622	1.0157	0.24845924470411	8.0064682719296	122.844478238287	21.13193	6.61415	150.59056	0.08123	0.06626	0.15385	70.75	12.9117	0.09743	11.48284	7.38189	0.51213	234.24997
130094	5263022	1	6	NO	4.71	6.5	2.2998135575272	3.2128180072068	5.9821531634806	1524456079.3658	FALSE	0.84497785568237	2.72174417597011	1.1605029644076	1.373	0.65427013605342	0.774	1.9010352666931	1524456078.4538	0.9119758605957	2.08	0.53540533092441	0.56659301202982	0.6213	0	8.1848463235604	90.2997403884419	22.99290	7.30828	120.60092	0.07802	0.05841	0.12585	49.08	4.3594	0.06018	8.53118	5.91181	0.37763	174.03617
130094	5263021	1	6	NO	4.71	6.5	2.1088270185993	2.3064214838443	6.5933968505576	1524455854.2657	FALSE	0.80097889900208	2.63281220170299	1.2992233581355	1.622	0.92726792906192	1.158	1.5773108474727	1524455853.6767	0.58898448944092	2.68	0.92505239107615	0.49694594376649	0.8437	1.2791202545512	7.0964112363521	89.1365690284019	33.83309	17.23394	140.20359	0.07077	0.04500	0.13869	125.42	12.4493	0.10028	13.63093	6.87273	0.47734	278.07097
129865	5254000	1	6	NO	5.11	16.1	2.0946243228282	2.2077841151754	6.7396223186506	1524334679.3831	FALSE	0.81098818778992	2.58280497097794	0.7765650216437	0.958	0.38609360986651	0.476	0.45687601912896	1524334679.0711	0.31199550628662	1.46	0.11852282767608	0.36499316542918	1.1699	0	6.6376954807014	84.7238969333976	11.64526	2.87858	99.24774	0.04855	0.04144	0.08445	70.79	45.1816	0.03796	10.55010	4.86509	0.25359	215.22212
128969	5213122	1	6	NO	4.58	25.0	2.7272020450631	4.6619222495136	5.096676572369	1523502473.9488	FALSE	1.0570213794708	2.5800821989320	0.6180827940479	0.585	0.96983625426782	0.918	1.7403202382268	1523502473.0817	0.8670175075531	2.01	0.96540689419181	0.75510482179486	0.8709	0.72739973596481	5.6194123044796	64.8665108483958	3.33180	8.20319	76.40150	0.08518	0.07232	0.10548	47.86	9.0109	0.06441	6.53317	3.74517	0.33492	133.27673
128969	5213126	1	6	NO	4.58	25.0	1.9543643537519	1.7931976760691	5.5903259358823	1523502208.8263	FALSE	0.77901840209961	2.50875248708438	0.68543562336484	0.880	0.40625678171324	0.521	1.7608184649635	1523502207.7253	1.101026058197	1.60	0.40971297887823	0.63962538088554	0.5809	0.33920126665631	6.954198311489	83.2156749471332	10.23593	3.59580	97.04741	0.06628	0.05683	0.09874	23.93	3.1572	0.03895	6.08484	4.75723	0.30481	124.13075
128969	5213112	1	6	NO	4.58	25.0	2.1844546798005	2.212158801674	6.6937953953945	1523503212.1676	FALSE	0.87899971008301	2.48515972729298	0.78427601184498	0.892	0.41254383723991	0.469	1.781595909252	1523503211.1446	1.0229997634888	1.74	0.26746497985973	0.89752459835437	0.8773	0.58222852902573	8.0237704537936	72.369755795061	9.32844	2.58114	84.27933	0.04530	0.03890	0.09676	30.54	7.7500	0.05116	6.00816	4.13134	0.30448	122.56655
127453	5153697	1	6	NO	3.78	4	1.8496340318172	1.6390942344105	4.9005547955236	1522208331.5029	FALSE	0.74500131607056	2.48272585822119	0.70144467147059	0.942	0.33925607724467	0.455	0.94170657904453	1522208330.9689	0.53400111198425	1.76	0.2466393153752	0.52908547233731	0.9908	0	4.4724002719303	85.2192523790286	12.25612	2.86696	100.34233	0.08528	0.07243	0.14334	59.98	18.9349	0.08081	8.78736	4.91874	0.43963	179.26210
128969	5213101	1	6	NO	4.58	25.0	2.4869698467252	3.3534133696816	7.3363309677096	1523505671.1881	FALSE	1.0229961872101	2.4310646293879	1.3598146811426	1.329	0.45861769316101	0.448	1.0617132221716	1523505670.6431	0.54499816894531	1.95	0.37306107829634	0.45610756434427	0.8369	0	7.4584482651071	59.5053780780001	17.78995	2.02356	79.31889	0.04130	0.03099	0.10598	71.72	13.2369	0.06048	8.05295	3.88818	0.33644	164.28014
129865	5254088	1	6	NO	5.11	16.1	2.2016037669238	2.0758805701807	6.0223883743149	1524332435.446	FALSE	0.91199827194214	2.41404379224907	0.66294903017526	0.727	0.52620246494138	0.577	2.9442724222025	1524332433.978	1.4679973125458	2.01	0.44475099519423	0.79234391007696	0.5397	0.65296300427925	6.9000485542229	65.8163051234813	5.96782	3.75977	75.54389	0.05204	0.04534	0.07229	28.22	2.0440	0.04662	5.18686	3.70313	0.26423	105.81185
128932	5211445	1	6	NO	4.1	23.2	1.7028289542095	1.4625756436307	4.7496417156492	1523418973.6225	TRUE	0.71199727058411	2.39162286789741	0.58785750663487	0.826	0.39326630464034	0.552	1.4852025053129	1523418972.3105	1.311995267868	1.13	0.38931963415818	0.65928669992928	0.5025	0.72791994830556	6.2061938313271	82.7454820955153	9.86158	4.41342	97.02048	0.08389	0.07155	0.11259	10.06	1.9824	0.02575	5.34623	4.75591	0.35977	109.06319
130094	5263017	1	6	NO	4.71	6.5	1.9858629214426	2.2891753723842	6.1126751764651	1524454932.922	FALSE	0.83397793769836	2.38119359239077	1.1736011238232	1.407	0.49105076217908	0.589	1.8695863115944	1524454931.765	1.1569695472717	1.62	0.45906430814513	0.59566756338482	0.5149	0	8.3685307646617	70.0280564770584	24.45764	4.28180	98.76750	0.06040	0.04282	0.10173	23.25	2.3598	0.03659	6.09677	4.84154	0.30581	124.37408
130094	5263016	1	6	NO	4.71	6.5	2.5905971686713	3.3854571972024	6.3371068788654	1524454440.691	FALSE	1.0899713039398	2.3767572222382	0.86174286180399	0.791	0.2871132544003	0.263	0.66281644209404	1524454440.235	0.45598793029785	1.45	0.2850042796549	0.33819011274436	0.7417	0.49053671853694	6.2755316943289	53.3816268303023	5.90673	0.65569	59.94405	0.04457	0.03969	0.08069	47.73	12.4251	0.03387	5.88706	2.93843	0.22929	120.09608
130094	5263025	1	6	NO	4.71	6.5	1.4453518688464	1.1699910594721	6.9669384449757	1524457036.6945	TRUE	0.61198401451111	2.36174774924642	0.63830242044941	1.043	0.45007717530184	0.735	1.0400653689844	1524457036.0276	0.66698241233826	1.56	0.4475089167811	0.39490891588542	0.5921	0.38960724861339	6.2719301918256	93.8780730832038	18.30923	9.10313	121.29043	0.04190	0.03243	0.09167	37.55	5.4136	0.03539	8.05169	5.94561	0.25944	164.25452
128121	5179695	1	6	NO	4.4	6.7	2.595959432824	4.0974013772079	6.4247605706742	1522815538.6763	FALSE	1.1010236740112	2.35776895093138	0.69899700090078	0.635	0.7269799818595	0.660	0.61088738339219	1522815538.3533	0.32300686836243	1.89	0.42257269073922	0.61086099651234	1.8912	1.3138939599891	5.7659527884222	52.0047551556743	3.77049	4.07842	59.85367	0.04374	0.03800	0.09326	114.06	114.0478	0.10427	14.11564	2.93400	0.58030	287.95903
127453	5153693	1	6	NO	3.78	4	1.9133237818699	1.6572427085429	7.7782653473704	1522207813.8649	FALSE	0.8120014667511	2.3563058198962	0.81795645854582	1.007	0.44716363496672	0.551	1.0943995663645	1522207812.6639	1.2010023593903	0.91	0.44341301697832	0.37015344670612	0.3082	0.91048112929224	7.2670640379769	70.4277352264457	12.87144	3.84680	87.14598	0.03204	0.02590	0.13568	7.12	0.8146	0.01828	4.66088	4.27186	0.36700	95.08189
130094	5263019	1	6	NO	4.71	6.5	1.5136434118675	1.2587069049477	6.239236512204	1524455367.7225	TRUE	0.6449830532074	2.3467956318238	0.63529207952171	0.985	0.46795816367472	0.726	0.67812294092555	1524455367.2675	0.4549880027771	1.49	0.40148261206866	0.40405163710837	0.8880	0.75373360673405	6.5230723062744	87.9507329915774	15.49313	8.40633	111.85019	0.05077	0.03992	0.08909	50.29	17.8530	0.03829	8.82304	5.48285	0.24451	179.99002
128121	5179690	1	6	NO	4.4	6.7	2.0260754676758	2.0856671627481	5.282566794357	1522815106.7868	FALSE	0.86521196365356	2.34170995407902	0.96511172956659	1.115	0.70158350945956	0.811	1.8672687689469	1522815105.7988	0.98795819282532	1.89	0.69370230178514	0.47986994404154	0.4857	0.9447538494278	4.4938726239625	65.2801152962942	14.81238	7.82760	87.92009	0.07468	0.05545	0.10765	37.24	2.4596	0.05551	6.25598	4.30981	0.33469	127.62190
130094	5263003	1	6	NO	4.71	6.5	2.1410420025031	2.2086491392342	7.7764349695399	1524455789.6817	FALSE	0.94600129127502	2.26325484145736	0.89384132778831	0.945	0.39866120648056	0.421	1.1577131715681	1524455788.3917	1.2900021076202	0.90	0.30839719728604	0.41366506122005	0.3207	2.3653370200788	5.7526702932643	55.77151110006	9.72037	1.93361	67.42550	0.02890	0.02390	0.07877	6.43	0.8210	0.01155	3.66066	3.30517	0.20622	74.67738
128121	5179687	1	6	NO	4.4	6.7	2.7585586937625	4.4313809631862	5.3966995400197	1522816251.4311	FALSE	1.2339086532593	2.2356263459827	0.80242018005514	0.650	0.510823580237	0.414	1.7019969078916	1522816249.9852	1.4458928108215	1.18	0.50771231990709	0.49166120700398	0.3400	0.96399524563194	5.3012496780234	41.7208024274679	3.53014	1.43064	46.68158	0.05419	0.04843	0.08151	9.87	0.8237	0.02188	2.81255	2.28831	0.21759	57.37593
129865	5254092	1	6	NO	5.11	16.1	2.4077672283244	2.7616812745438	7.3613214774703	1524335518.3271	FALSE	1.0789980888367	2.2314842382346	0.97399162855529	0.903	0.20619694297674	0.191	1.0949606521231	1524335517.7381	0.58899879455566	1.86	0.11686232562073	0.4206664850761	0.7142	0.57091724736125	7.3575249711888	47.5339819015245	7.77832	0.34861	55.66091	0.03036	0.02593	0.06301	60.44	8.9201	0.04286	6.12825	2.72848	0.21879	125.01636
127453	5153696	1	6	NO	3.78	4	2.0450831267021	1.873364035284	5.7026842760299	1522208263.2538	FALSE	0.92300176620483	2.21568712171701	0.90751508225931	0.983	0.39167115923078	0.424	1.6580268171533	1522208262.2748	0.97900176048279	1.69	0.386347066663	0.65939143660157	0.6735	0.55435575535946	8.7322680321712	54.7837251143542	10.78791	2.00943	67.58107	0.05255	0.04260	0.11961	30.18	4.7728	0.06561	5.02600	3.31280	0.37393	102.53044
128932	5211454	1	6	NO	4.1	23.2	1.6004082480482	1.3169186278747	5.07273341909	1523418245.6988	TRUE	0.74500012397766	2.14819863318062	0.29652381381639	0.398	0.47116218311309	0.632	1.5413244311055	1523418244.8988	0.80000019073486	1.93	0.46885527768191	0.70461930033027	0.8808	0.78444164426389	7.5305619251887	63.8013328541351	2.19022	5.52980	71.52135	0.05673	0.05061	0.08684	47.79	9.9879	0.07534	6.33830	3.50595	0.32559	129.30127
129865	5254088	1	6	NO	5.11	16.1	1.9327729030778	1.6066823060041	6.8841719226832	1524332431.365	FALSE	0.8999981880188	2.1475297715126	0.76595264930784	0.851	0.42713141893281	0.475	0.78221565988786	1524332430.764	0.600998878479	1.30	0.42225484819143	0.30459949348062	0.5068	0.81090026562147	6.1894632714312	52.7805578539665	8.28927	2.57772	63.64754	0.03312	0.02746	0.06010	29.03	4.4022	0.02108	4.75889	3.11998	0.15289	97.08128
129865	5254109	1	6	NO	5.11	16.1	2.1003799626482	1.8511934553361	5.6904330438922	1524333449.4862	FALSE	0.97899746894836	2.1454396249915	0.5692840489801	0.581	0.74962988027067	0.766	1.7300061047485	1524333448.5192	0.9669976234436	1.79	-0.091575768506568	1.1951752125495	1.2360	0.50786298109847	6.6086950483886	48.4270763754983	3.55755	6.16860	58.15322	0.04817	0.04011	0.05973	34.09	16.2714	0.05110	5.31946	2.85065	0.22157	108.51689
128932	5211447	1	6	NO	4.1	23.2	2.4283756155201	2.7492298439292	6.3914017600403	1523419094.581	FALSE	1.1339957714081	2.1414326902690	0.74077390172051	0.653	0.26466913451691	0.233	0.84553207084902	1523419094.192	0.38899850845337	2.17	0.25077774220004	0.65460831067526	1.6828	0	6.5740663471141	41.6518835876806	3.87592	0.49478	46.02258	0.03500	0.03168	0.08506	125.10	74.9819	0.12685	12.06389	2.25601	0.61088	246.10340
128932	5211459	1	6	NO	4.1	23.2	2.1988049769177	2.1500906128482	5.0138494845123	1523418179.4775	FALSE	1.0460093021393	2.1020893145221	0.99903843902252	0.955	0.50304524760781	0.481	0.90539467586642	1523418178.6545	0.82300734519958	1.10	0.4996299256594	0.50719112281599	0.6163	0.16997756538409	6.5417086185966	43.5114951798827	8.98245	2.27743	54.77138	0.06244	0.04960	0.09337	15.15	4.7530	0.02669	3.66032	2.68487	0.22746	74.67053
128121	5179694	1	6	NO	4.4	6.7	1.8683789396155	1.4835432176365	4.4803323704056	1522814877.2391	FALSE	0.8900191783905	2.0992569429731	0.71400075325257	0.802	0.57474494501468	0.646	1.2799592962773	1522814876.6281	0.61101293563843	2.09	0.57325177625901	0.6040473348354	0.9886	0	5.2629004957559	50.9998684770810	7.44795	4.82602	63.27384	0.07686	0.06195	0.07969	73.97	16.4751	0.07821	7.53543	3.10166	0.32654	153.72280
127453	5153677	1	6	NO	3.78	4	2.4497915697218	2.7000914911749	5.5295064953766	1522208939.3647	FALSE	1.1680080890656	2.0974097633875	0.74580664367249	0.639	0.32836499098107	0.281	1.1443161090069	1522208938.5977	0.76700520515442	1.49	0.32500569347805	0.63382149536297	0.8264	0.33077476475887	5.1526188880069	38.7934089621313	3.59544	0.69697	43.08582	0.04509	0.04060	0.09649	29.89	9.1701	0.05745	4.02679	2.11205	0.30479	82.14654
128121	5179695	1	6	NO	4.4	6.7	2.3697128812223	2.7236176059589	6.1530597236798	1522815535.5063	FALSE	1.1350243091583	2.0878080426133	0.5924544137596	0.522	0.54546819305478	0.481	0.65369837704671	1522815535.1062	0.40000867843628	1.63	0.3143979044881	0.51935872546135	1.2984	0	6.4564702798865	39.5560752246288	2.47247	2.09585	44.12440	0.03624	0.03249	0.07087	68.77	43.4074	0.06350	7.66174	2.16296	0.33953	156.29940
128932	5211450	1	6	NO	4.1	23.2	2.0664096775427	1.649970889203	5.544476721877	1523419338.5441	FALSE	0.98999643325806	2.0872900225935	0.75915966384156	0.767	0.66952441178017	0.676	1.492021656072	1523419338.0211	0.52299785614014	2.85	0.61532127393655	0.77262461448886	1.4773	0	5.4852308292468	45.328274696937	6.11790	4.75849	56.20467	0.04959	0.03999	0.09069	160.28	42.9808	0.17326	12.71905	2.75513	0.63983	259.46858
130094	5263001	1	6	NO	4.71	6.5	1.4152658601177	1.0780156833026	7.7016261969977	1524456822.8361	TRUE	0.67899680137634	2.0843483463382	0.8247533775259	1.215	0.58608186614148	0.863	0.26873580619443	1524456822.4691	0.36699819564819	0.73	0.53296862729086	0.22922276019889	0.6246	0.6133225965415	6.6618308957647	65.9037459481205	22.38114	11.30188	99.58677	0.03123	0.02067	0.08351	15.05	10.9487	0.01178	6.15608	4.88170	0.16223	125.58404
129865	5254109	1	6	NO	5.11	16.1	2.1234686087252	1.9118853010276	7.8838212065209	1524333435.9192	FALSE	1.0229976177216	2.0757317240431	0.69433161585821	0.679	0.60180067995777	0.588	0.82742459887781	1524333434.7182	1.2009968757629	0.69	0.44651272332642	0.4060161920839	0.3381	0.46389581971009	8.1518788977822	43.3815482951836	4.63818	3.48433	51.50405	0.02322	0.01956	0.05528	4.07	0.9802	0.00636	2.77230	2.52471	0.13197	56.55491
129865	5254086	1	6	NO	5.11	16.1	3.2499372150833	7.2198948274791	7.5391861791636	1524332066.2417	FALSE	1.5679969787598	2.0726680338720	0.9214484853434	0.588	0.25661272106701	0.164	1.0238486733153	1524332065.5197	0.72199869155884	1.42	0.23997569393673	0.44607821338129	0.6178	0	7.5552404580242	28.2196421417446	2.26853	0.17594	30.66411	0.02318	0.02133	0.05045	28.69	5.4457	0.02586	3.17636	1.50314	0.15569	64.79771
128932	5211450	1	6	NO	4.1	23.2	1.3329436482228	1.0231511468529	4.1732477637928	1523419334.1291	TRUE	0.64499759674072	2.06658699963905	0.59221217977886	0.918	0.6202634702368	0.962	0.9686535793714	1523419333.6841	0.44499850273132	2.18	0.64467716217083	0.31716965469083	0.7127	0.86355047841393	2.9520541741997	68.2003360030773	13.46225	14.76778	96.43037	0.09784	0.06920	0.10137	109.67	11.7583	0.08807	10.67948	4.72698	0.38703	217.86138
129865	5254092	1	6	NO	5.11	16.1	3.4196987890792	7.0547790533296	6.0779165843613	1524335524.4431	FALSE	1.6569969654083	2.0637930306870	0.9760171996823	0.589	0.49615521928134	0.299	1.7984561217026	1524335523.6321	0.81099843978882	2.22	0.49198691398552	0.6688986181574	0.8248	0	8.2960084458101	26.4757209294992	2.15669	0.55732	29.18973	0.03587	0.03254	0.05075	62.46	8.6397	0.06050	4.91597	1.43087	0.25969	100.28580
129865	5253990	1	6	NO	5.11	16.1	2.5901458588761	3.2586033518489	6.3326642708462	1524335345.2817	FALSE	1.2790129184723	2.0251131333137	0.9310548432027	0.728	0.40445213111015	0.316	1.2154122234855	1524335344.7037	0.57800579071045	2.10	0.42981083457016	0.52185199415755	0.9028	0	7.2229635619629	33.0263724298151	4.26740	0.80528	38.09905	0.03329	0.02886	0.05113	78.79	14.5256	0.05659	6.44205	1.86760	0.25606	131.41773
129865	5254000	1	6	NO	5.11	16.1	2.6474546870749	3.6413636170741	6.0158335244689	1524334682.663	FALSE	1.3119809627533	2.0179063280911	0.66633863613174	0.508	0.3879080631499	0.296	1.0484909067872	1524334682.1521	0.51099252700806	2.05	0.40334872501267	0.61504591857498	1.2036	0	7.1143679623904	31.9677224478685	2.02509	0.68630	34.67911	0.03444	0.03175	0.04774	84.86	29.2017	0.06116	7.29141	1.69996	0.28450	148.74473
129865	5254084	1	6	NO	5.11	16.1	1.8714534021415	1.4929717208049	6.5957186077693	1524331505.7888	FALSE	0.93499827384949	2.00155813597016	0.60129286578754	0.643	0.28941604513021	0.310	1.0931663193138	1524331505.2998	0.48899912834167	2.24	0.29321403696259	0.59837758774836	1.2237	0.55968534002122	5.713775104392	44.1329373136644	4.55593	1.05548	49.74435	0.02929	0.02599	0.04880	105.27	31.5401	0.07019	9.14460	2.43845	0.27872	186.54984
129865	5253991	1	6	NO	5.11	16.1	2.2410063165806	2.7254650381514	4.8592618521716	1524335416.4775	FALSE	1.1230113506317	1.9955330952978	0.95242272001537	0.848	0.43398269825038	0.386	0.4536540791791	1524335416.2105	0.26700258255005	1.70	0.46292261524888	0.3241434819112	1.2140	0	6.5517432928518	36.5233788790681	6.59697	1.36971	44.49006	0.05797	0.04759	0.05242	111.36	56.8546	0.04713	10.42684	2.18089	0.31022	212.70752
129865	5254059	1	6	NO	5.11	16.1	1.9273494276518	1.5596115055989	5.3690671657637	1524331709.4341	FALSE	0.96768260002136	1.99171652730891	0.44250372286528	0.457	0.48600531434675	0.502	1.0164467033899	1524331708.8673	0.56681418418884	1.79	0.43981431750682	1.0011317349276	1.7662	0.25161711730395	5.5508774380289	42.2239974845051	2.22573	2.68485	47.13458	0.04335	0.03883	0.04786	58.44	56.6888	0.06847	7.95392	2.31052	0.26124	162.25993
128932	5211445	1	6	NO	4.1	23.2	1.5682597782011	1.2295345281424	4.3860927490495	1523418970.3645	TRUE	0.81099700927734	1.93374298580773	0.59542727850078	0.734	0.51625224621651	0.637	1.0284038245832	1523418968.9745	1.3899948596954	0.74	0.52436751707391	0.53844227179729	0.3874	0	5.9533204626561	47.4914549518183	6.84600	5.14640	59.48385	0.06870	0.05485	0.07862	4.06	1.1119	0.01171	3.16922	2.91588	0.23192	64.65203
128932	5211460	1	6	NO	4.1	23.2	1.3934294354611	1.0579944929598	5.8743297247499	1523419172.7134	TRUE	0.72200655937195	1.92994013333231	0.75052935614017	1.040	0.30372811022999	0.421	0.37158820508204	1523419172.1014	0.61200547218323	0.61	0.39948840451157	0.32358151038474	0.5287	0	5.946860669945	53.1353757939721	15.41520	2.52455	71.07512	0.04074	0.03046	0.08364	6.20	4.7048	0.01088	4.01883	3.48407	0.17825	81.98423
129865	5254059	1	6	NO	5.11	16.1	1.8975896327214	1.5620347083892	5.8618324772736	1524331702.3194	FALSE	1.0006718635559	1.8963155674012	0.8982353308829	0.898	0.52352951164892	0.523	1.1185537768052	1524331701.1078	1.2116024494171	0.92	0.4542328126431	0.41823620496789	0.3452	0.043758406176103	8.201570792385	37.0140627312261	8.29359	2.81737	48.12502	0.03840	0.02953	0.05053	7.25	1.0130	0.01050	2.76390	2.35907	0.13087	56.38354
128932	5211439	1	6	NO	4.1	23.2	1.9654417478588	1.485581886228	2.8891067356038	1523419511.9512	FALSE	1.0569477081299	1.8595449261500	0.73613946128917	0.696	0.49779436166776	0.471	0.42162425912649	1523419511.5962	0.35498237609863	1.19	-0.028987842366746	0.61677373086411	1.7375	0	2.7345902617511	33.6974528157402	4.72712	2.16161	40.58618	0.14080	0.11690	0.06992	40.93	87.5928	0.07436	8.28978	1.98952	0.38916	169.11150
128969	5213101	1	6	NO	4.58	25.0	2.0807455361413	1.6681771264433	6.3107846760798	1523505674.4571	FALSE	1.1349959373474	1.8332625410133	0.90580826278133	0.798	0.36397146688493	0.321	1.6076615780571	1523505673.4901	0.96699643135071	1.66	0.36109459677058	0.61088672672114	0.6317	0.063979060064399	8.0837589274432	30.4994667972241	5.77999	0.93323	37.21268	0.02906	0.02381	0.05516	29.44	4.2509	0.04255	3.47571	1.82415	0.19466	70.90457
129865	5254092	1	6	NO	5.11	16.1	2.4202022257899	2.3222991914162	6.5337449967782	1524335529.0581	FALSE	1.3239974975586	1.8279507553849	0.86865847995773	0.656	0.31403320994817	0.237	1.4338272675937	1524335528.1021	0.95599818229675	1.50	0.30198717907772	0.60553481416486	0.6334	0.57601644513404	7.7205544309343	25.9943548940362	3.34868	0.43765	29.78069	0.02530	0.02209	0.04137	24.24	4.3226	0.02865	2.85977	1.45984	0.13956	58.33921
128491	5195744	1	6	NO	5.14	18.4	1.4825060990409	1.1294044190972	5.8746061523672	1523134634.7386	TRUE	0.81198859214783	1.82577207780648	0.36693348521715	0.452	0.27784724956121	0.342	1.9260356813923	1523134633.8156	0.92298674583435	2.09	-0.14308826959676	0.85429781903275	0.9256	0.86360579194753	4.9568348954983	42.2844239894892	2.59037	1.48525	46.36005	0.02988	0.02726	0.03904	48.59	9.5603	0.05566	5.12323	2.27255	0.18804	104.51395
128491	5195744	1	6	NO	5.14	18.4	1.7124952523009	1.3000073995207	6.4666937283404	1523134632.8596	TRUE	0.95598649978638	1.79133832191518	0.48658085949859	0.509	0.38255277189038	0.400	0.8546943371942	1523134631.9256	0.93398690223694	0.92	0.085117328114854	0.4526491964946	0.4846	1.1335445066966	6.9871540164285	34.5732892023821	2.79121	1.72530	39.08980	0.02448	0.02165	0.03875	9.23	2.5902	0.01145	2.49583	1.91617	0.09979	50.91502
127453	5153700	1	6	NO	3.78	4	1.8784867120214	1.4712929992122	5.7600463853348	1522209418.234	FALSE	1.0680019855499	1.7588794191747	0.66878452764936	0.626	0.42198821960766	0.395	0.90425643985486	1522209417.7	0.53400111198425	1.69	0.42031242717507	0.4463235523583	0.8358	1.1808782652165	5.890599711212	29.8357733285621	3.78176	1.50564	35.12317	0.03098	0.02631	0.07193	55.31	13.4744	0.07043	5.09345	1.72172	0.31918	103.90636
129865	5254084	1	6	NO	5.11	16.1	2.4726976860017	2.5808166766544	5.3782277904034	1524331511.5278	FALSE	1.4339971542358	1.7243393257077	0.84490877366327	0.589	0.57259899336337	0.399	1.3708554795185	1524331510.5268	1.0009980201721	1.37	0.57093745018304	0.96370590565799	0.9627	0.17278565883387	7.8828445189343	21.3567124902671	2.49352	1.14523	24.99546	0.03395	0.02901	0.03761	19.30	9.5373	0.03029	2.63878	1.22527	0.13753	53.83117
128121	5179694	1	6	NO	4.4	6.7	1.6492669406996	1.3482583002406	6.1017536348444	1522814867.4749	TRUE	0.96702075004578	1.70551349660441	0.59826078308276	0.619	0.43632658641456	0.451	0.71702884478336	1522814866.8969	0.57801246643066	1.24	0.1582797240264	0.42915779880571	0.7425	0.68082518085515	5.9657223999394	30.9821642976219	4.07672	2.16847	37.22735	0.02649	0.02205	0.05094	27.42	9.8234	0.03047	3.65062	1.82487	0.16283	74.47269
128491	5195737	1	6	NO	5.14	18.4	1.9637961999325	1.5727700183677	5.8863409312675	1523136481.8091	FALSE	1.155980348587	1.69881451906421	0.85219964456715	0.737	0.33624775327402	0.291	1.1601983080909	1523136481.3192	0.48999166488647	2.37	0.38940194623067	0.57577997585438	1.1751	0	7.614162935958	25.7145365569781	4.84249	0.75388	31.31091	0.02862	0.02350	0.03753	117.85	29.0258	0.07463	8.73472	1.53485	0.30415	178.18835
128491	5195766	1	6	NO	5.14	18.4	2.2692823650051	1.6768826199981	0.27966094990546	1523131847.743	FALSE	1.357010602951	1.67226575832955	0.51327020190574	0.378	0.9595846602035	0.707	1.7584143429291	1523131846.954	0.78900599479675	2.23	-0.11741149688104	1.2332987165275	1.5631	0	0.25528547829474	21.2258249361664	1.08587	3.79537	26.10707			0.03674	64.84	31.8958	0.07915	6.02168	1.27976	0.27338	122.84219
129865	5254087	1	6	NO	5.11	16.1	2.8683907639858	4.5840880661918	7.2958407903617	1524332084.8247	FALSE	1.7239966392517	1.6638029904924	0.73886325774101	0.429	0.25870517983172	0.150	1.0090496812595	1524332084.2687	0.55599904060364	1.81	0.23331131573681	0.67690242514724	1.2175	0.88207791417751	7.0632683078798	16.5388234407705	1.09738	0.13454	17.77074	0.01577	0.01468	0.03214	61.02	27.4579	0.05161	5.20805	0.87111	0.25416	106.24414
127707	5162444	1	6	NO	3.95		1.7667083788837	1.34748441932	7.2416363184745	1522468702.7276	TRUE	1.0779893398285	1.6388922539482	0.75960531842501	0.705	0.34667441718006	0.322	0.26516975580965	1522468701.8816	0.84599184989929	0.31	0.27319989898597	0.20754579999782	0.2453	1.3791526275041	7.1652386317338	25.6639537371788	4.74427	0.98818	31.39641	0.01768	0.01445	0.05943	1.20	0.7328	0.00287	1.63359	1.53904	0.11259	33.32533
129865	5254084	1	6	NO	5.11	16.1	2.5510714747414	2.7807457442827	6.5016704543623	1524331502.4748	FALSE	1.5799970626831	1.6146052008535	0.53318662312059	0.337	0.32290818996663	0.204	1.8664618307648	1524331501.3408	1.1339976787567	1.65	0.25074144052745	0.76005785736274	0.6702	0.93591811671672	9.7044629735021	16.9947053490217	0.74238	0.27229	18.00937	0.01844	0.01740	0.02986	24.61	4.0803	0.03413	2.28900	0.88281	0.13297	46.69557
128969	5213127	1	6	NO	4.58	25.0	1.3168528553099	1.0034230509749	5.2838537743799	1523502540.5472	TRUE	0.82301950454712	1.60002630318527	0.49243802204674	0.598	0.27852843290873	0.338	0.30266582420332	1523502540.0352	0.51201224327087	0.59	-0.019841595076958	0.17145794549408	0.3349	0.40707158986274	2.6941352721488	32.0391762460387	4.48033	1.43333	37.95284	0.03065	0.02588	0.04080	7.03	2.2559	0.00621	2.31560	1.86043	0.08237	47.23817
127453	5153701	1	6	NO	3.78	4	1.5812295540526	1.1908621213695	5.91843245798	1522209441.1991	TRUE	0.99000191688538	1.59719847717797	0.52018286647561	0.525	0.44137645276972	0.446	0.77363649827734	1522209440.7211	0.47800087928772	1.62	0.26161796227221	0.50807346556669	1.0629	1.8585542853347	5.6277864039291	26.5411027993881	2.87238	2.06799	31.48146	0.02438	0.02055	0.05976	56.44	24.3447	0.07405	5.50348	1.54321	0.31602	112.27109
128932	5211442	1	6	NO	4.1	23.2	2.0044508170093	1.488421850403	4.554267313151	1523419714.8372	FALSE	1.2779364585876	1.5685058545279	0.94109225948319	0.736	0.50523846134362	0.395	1.0840663248091	1523419714.3472	0.48997569084167	2.21	0.56737841649012	0.22567552750672	0.4606	0.39548613998602	5.0010020845158	19.8289744152036	4.37093	1.25980	25.45971	0.04298	0.03347	0.05303	102.90	4.4595	0.08574	6.51086	1.24802	0.38271	132.82153
128932	5211445	1	6	NO	4.1	23.2	1.5124089866841	1.0906476551771	5.5952767798946	1523418976.1135	TRUE	0.96799635887146	1.56241185498605	0.57826585575629	0.597	0.4654385145342	0.481	0.81397452071694	1523418975.5465	0.56699800491333	1.44	0.44540490030199	0.66342331053592	1.1701	0.46835673639736	5.1368007080333	25.9749399436828	3.79727	2.46003	32.23224	0.02730	0.02200	0.05085	37.44	24.8699	0.05758	4.63433	1.58001	0.23652	94.54028
128932	5211455	1	6	NO	4.1	23.2	1.3469841069815	0.96797129863173	5.1471610346217	1523418342.0478	TRUE	0.87900018692017	1.53240480152916	0.79262010396342	0.902	0.40895750397427	0.465	0.83961965028558	1523418341.6918	0.35600018501282	2.36	0.53435817677966	0.30081769802031	0.8450	0	6.2080920770658	27.5166313501794	9.52797	2.53645	39.58106	0.03598	0.02501	0.05670	160.94	20.6582	0.10536	10.84190	1.94025	0.44519	221.17475
130094	5263018	1	6	NO	4.71	6.5	2.0715524204504	1.9923969848694	5.5015887905836	1524455320.1498	FALSE	1.3789637088776	1.5022530376354	1.0349128335528	0.751	0.55656773206462	0.404	1.6566054719801	1524455319.1488	1.0009734630585	1.65	0.55540605547029	0.90901847414801	0.9081	0.016713666866194	8.700302263295	16.8566228378077	4.20713	1.21679	22.28054	0.02781	0.02104	0.03794	28.18	8.4862	0.04533	2.88976	1.09218	0.17327	58.95111
128932	5211461	1	6	NO	4.1	23.2	1.5781401756063	1.077630213837	4.3715454726924	1523419556.2659	TRUE	1.0570096969604	1.4930233659582	0.52317995149015	0.495	0.4802188321933	0.454	0.46415480203457	1523419555.6769	0.5890052318573	0.79	0.4794694968773	0.20878852221846	0.3545	0	5.4259477147729	21.7215825080759	2.38728	2.01131	26.12017	0.03958	0.03292	0.04500	10.86	2.1973	0.01253	1.92044	1.28040	0.10510	39.17688
129865	5254090	1	6	NO	5.11	16.1	2.2051267714747	1.8236626195077	6.6444248967614	1524334638.3268	FALSE	1.5009970664978	1.4691079820827	0.63235650440001	0.421	0.36635978446802	0.244	1.1632042125844	1524334637.7488	0.57799887657166	2.01	0.20097284959778	0.64855792209453	1.1221	0	6.862106433448	14.8103328149513	1.21793	0.40880	16.43706	0.01531	0.01380	0.02589	72.17	22.4364	0.05737	5.44340	0.80574	0.24223	111.04540
128491	5195737	1	6	NO	5.14	18.4	1.6938062219535	1.1540989410937	6.2479067660057	1523136484.7221	TRUE	1.1789798736572	1.4366710236531	0.68578656142996	0.582	0.33617444343499	0.285	1.1659125938167	1523136483.8991	0.82298588752747	1.42	0.33533115844176	0.66156290557415	0.8039	0.77038181174468	8.0425483647176	18.0320664212521	2.95594	0.71031	21.69832	0.01795	0.01492	0.02653	25.12	8.0873	0.02834	2.69137	1.06364	0.11398	54.90400
128491	5195767	1	6	NO	5.14	18.4	2.295073952155	2.230305696931	5.0574826876965	1523133737.9665	FALSE	1.6010122299194	1.43351431629635	0.51525733690323	0.322	0.70581799755021	0.441	1.7902991654741	1523133737.1215	0.84500646591187	2.12	0.52969253082002	1.1064206984402	1.3094	0	7.4329285169487	13.2204623695095	0.66635	1.25037	15.13718	0.02596	0.02267	0.02513	54.72	20.8977	0.06626	4.44853	0.74202	0.23019	90.75009
128121	5179685	1	6	NO	4.4	6.7	1.7087963294214	1.1671394133504	5.0527898204431	1522815890.0789	TRUE	1.2789051532745	1.3361399983777	0.46650144014592	0.365	0.33899282779973	0.265	1.3074325530312	1522815889.5459	0.53296065330505	2.45	0.30466539258607	0.80201716056782	1.5048	0.37669840018255	7.1754926046322	14.3781436286696	1.07159	0.56585	16.01558	0.02198	0.01973	0.02899	116.30	43.7642	0.12073	8.63150	0.78508	0.45149	176.08265
127453	5153699	1	6	NO	3.78	4	2.1939647492605	1.6192216503387	4.129370273892	1522208983.3372	FALSE	1.6900033950806	1.2982013856581	0.95366252406123	0.564	0.35879155449308	0.212	1.394930100289	1522208982.3252	1.012001991272	1.38	0.29730079378732	0.98217586283676	0.9705	0.38763157504426	5.99919951913	10.2714979621299	1.94072	0.27470	12.48692	0.03391	0.02789	0.04046	19.34	9.5868	0.05613	2.02995	0.61210	0.21455	41.41108
130094	5263028	1	6	NO	4.71	6.5	2.9266674332895	4.951559437561	5.4873160261304	1524456436.7713	TRUE	2.3129961490631	1.2653144426872	1.2605380711514	0.545	0.98737845023245	0.427	1.2311264420887	1524456435.7933	0.97799825668335	1.26	0.48054964779408	0.54914575154476	0.5615	0.74697905852451	7.3414924987048	7.1295028256189	1.32259	0.81148	9.26357	0.01950	0.01500	0.02646	16.69	3.3205	0.02417	1.43495	0.45410	0.11898	29.27296
129865	5254094	1	6	NO	5.11	16.1	1.8987404529243	1.3998062683451	6.3212974124258	1524335920.3053	FALSE	1.5009973049164	1.2649859174997	0.51517862402791	0.343	0.39142133857984	0.261	0.9328164301354	1524335919.7603	0.54499888420105	1.71	0.34463474966264	0.62448067977219	1.1458	0.21834869814069	8.246751535671	10.9806663024529	0.80838	0.46664	12.25569	0.01261	0.01130	0.01930	55.37	24.8135	0.04585	4.53114	0.60077	0.19843	92.43516
129865	5254085	1	6	NO	5.11	16.1	1.949439414548	1.518996055753	8.1140596359114	1524331852.6611	FALSE	1.6239969730377	1.20039596557964	0.60809629226567	0.374	0.37016751672356	0.228	0.52163126659258	1524331852.3171	0.34399938583374	1.52	0.091743427292423	0.31304743439162	0.9100	1.0447010980518	8.0743086916112	9.13905021404752	0.88925	0.32952	10.35782	0.00700	0.00618	0.01765	68.85	24.7962	0.03380	5.09814	0.50774	0.21475	104.00201
128121	5179687	1	6	NO	4.4	6.7	1.9696052373336	1.4588441069374	4.3471946831222	1522816256.7017	FALSE	1.6568772792816	1.1887453959098	0.67380079652577	0.407	0.59251417920398	0.358	1.9736327490769	1522816254.7449	1.9568548202515	1.01	0.58718918606857	0.46752051751368	0.2389	0.69389711530611	5.9111846456318	8.7846523275207	1.02809	0.79499	10.60773	0.02548	0.02110	0.02487	5.35	0.3004	0.01566	0.79717	0.51999	0.08317	16.26237
128932	5211460	1	6	NO	4.1	23.2	1.82338806444	1.1233581052021	3.7644843198144	1523419180.5195	TRUE	1.6910152435303	1.07828008731213	1.2701525120524	0.751	0.66079904088834	0.391	0.90970784317995	1523419178.5065	2.0130181312561	0.45	0.5666256769437	0.20914862794627	0.1039	0.5118133071266	4.8271326702006	7.08195026435439	3.43642	0.93011	11.44848	0.03743	0.02315	0.03155	1.04	0.0552	0.00361	0.61513	0.56120	0.07576	12.54867
129865	5254110	1	6	NO	5.11	16.1	1.6052270560061	1.0976838079964	6.3172401231953	1524333810.4733	TRUE	1.7339956760406	0.9257387882716	0.4253469904685	0.245	0.52277210441815	0.301	0.58128417646863	1524333809.9283	0.54499864578247	1.07	0.49747291049339	0.59440810379378	1.0907	0.44791693008858	7.264473341428	5.0905667495639	0.35742	0.53991	5.98789	0.00713	0.00606	0.01089	21.50	22.4812	0.02515	2.44944	0.29352	0.11948	49.96862
128932	5211461	1	6	NO	4.1	23.2	1.3418439799512	0.99246511573779	6.6536187943308	1523419549.4938	TRUE	1.7010152339935	0.7888488904364	0.60061721243354	0.353	0.32943588895632	0.194	0.23720625335574	1523419548.5708	0.92300820350647	0.26	0.16892662401556	0.13993406917652	0.1516	1.7337249628188	3.4705177823498	3.7680500226695	0.75493	0.22712	4.75010	0.00500	0.00397	0.01317	0.74	0.2565	0.00149	0.28155	0.23285	0.02456	5.74360
128121	5179693	1	6	NO	4.4	6.7	1.5042618476639	1.013324664817	4.1069643306279	1522814837.3143	TRUE	2.0570440292358	0.7312735295329	0.36404991228391	0.177	0.35688405307788	0.173	0.62621215916483	1522814836.4683	0.84601807594299	0.74	0.35418021662166	0.3560489058925	0.4209	0.10044522956805	4.4269073611875	2.6776471306258	0.15683	0.15072	2.98519	0.00997	0.00895	0.00869	6.67	2.1563	0.01057	0.57901	0.14633	0.04853	11.81177
129865	5254110	1	6	NO	5.11	16.1	1.3424674668498	0.85137546024283	3.4611881717741	1524333816.0332	TRUE	1.945995092392	0.689861691891345	1.1051761256447	0.568	0.81995842494334	0.421	0.83060516415641	1524333813.8093	2.2239942550659	0.37	0.81909844424042	0.26047262086973	0.1171	0.47714739256374	5.5633150709865	2.51894997306921	1.70716	0.93971	5.16583	0.02299	0.01121	0.01055	0.65	0.0635	0.00166	0.28801	0.25323	0.02571	5.87534
128932	5211439	1	6	NO	4.1	23.2	1.5002060702265	0.97440591628303	1.57311271791	1523419515.0431	TRUE	2.5798718929291	0.5815040949662	0.148860643838	0.058	0.57827198523875	0.224	0.29085816041216	1523419513.6531	1.3899312019348	0.21	0.15195058110467	0.084418082795542	0.0607	0	3.544903699075	1.3500337896271	0.01329	0.20059	1.56392	0.04467	0.03856	0.00658	0.32	0.0273	0.00080	0.09391	0.07666	0.01240	1.91575
126968	5133171	3	8	YES	4.96	7.4	3.4732319255246	9.0583689210771	5.3509263376834	1521840618.683	FALSE	0.50800752639771	6.83696942475114	1.1066620882282	2.17843640245955	1.2105525324866	2.38294212109543	2.4945156478469	1521840617.593	1.0900161266327	2.2885126071969	1.1999093237886	0.59043557792488	0.541676002307292	1.2969325848683	5.2888005143205	1421.62683446362	144.327174117132	172.697211452924	1738.65122003368	0.62955	0.51476	0.73269	74	4	0.07088	58.80401	56.26703	2.40874	1817.04397
130359	5275430	3	8	YES	5.19	8	2.416000034072	7.1807972606439	4.9544242183895	1523044669.4791	FALSE	0.36700749397278	6.58297193858169	1.175663766565	3.20337809410561	1.4667689263161	3.99656396777796	2.0017089490545	1523044668.2381	1.2410252094269	1.6129478546039	1.4529558046074	1.181176636402	0.951774893394359	0	6.7837001359346	1824.30546501821	431.986280544184	672.399046007663	2928.69079157006	0.89365	0.55666	0.81436	32	11	0.04106	96.19277	94.77964	3.62130	2972.35671
116936	4728870	3	8	YES	5.74	15	2.513690275089	7.2474697895694	7.991243806608	1513298414.848	FALSE	0.38500070571899	6.52905368158917	1.7710271518919	4.60006209231357	1.1605513724524	3.0144136236973	1.4302807296908	1513298413.705	1.1430015563965	1.2513375171596	1.1375171372276	1.5502758614701	1.3563199916872	0.76159273675213	6.6083313516688	1710.67471763674	849.16941970398	364.647000922844	2924.49113826356	0.35982	0.21048	0.69742	21	25	0.03259	96.13342	94.64373	2.81149	2970.52274
127365	5150595	3	8	YES	5.95	7.5	2.8508850455437	8.3470781468762	7.202241620587	1522092201.1377	FALSE	0.45400142669678	6.27946274593485	1.4892925573499	3.28036977369363	1.1826220531006	2.60488620422432	2.5363149134653	1522092200.3717	0.76600217819214	3.31110665958068	1.1677886794528	0.84271211571684	1.10014323680612	0.26478900814244	7.9825205644081	1341.88791798788	366.198759826704	230.913209411611	1938.9998872262	0.34634	0.23969	0.50746	221	24	0.10842	70.69709	62.75081	1.53635	2184.54008
136127	5523810	3	8	YES	6.48	20.8	3.27081097120504	8.69886732166745	7.42417743505593	1529295585.85171	FALSE	0.529005289077759	6.18294568832611	2.18443322300921	4.12932208450588	1.51243169861667	2.85901054269867	2.20897888209323	1529295585.18171	0.67000675201416	3.29695018065511	1.47257536683797	0.755928426681005	1.12824001311711	0	8.68530323024785	1116.50155639218	497.996152397657	238.726144017507	1853.22385280734	0.36299	0.21869	0.47648	251	29	0.09118	69.03659	59.97488	1.24313	2133.23051
126968	5133173	3	8	YES	4.96	7.4	3.4631101653512	8.9267359206654	5.2193305000569	1521841041.8383	FALSE	0.58300876617432	5.94006534082839	1.3129672074569	2.25205397179967	1.1146745339776	1.91193443160735	2.1493914981914	1521841041.1473	0.69101023674011	3.11050601555674	1.1047939990184	0.53404342314827	0.77284444535534	0.11274404307201	6.5183395254494	935.052172012542	134.403626696764	96.8722501445948	1166.3280488539	0.50941	0.40840	0.56407	216	13	0.13166	45.17823	37.74524	1.47538	1396.00726
136125	5523791	3	8	YES	3.94	2.9	2.75418430701177	7.91707148059973	6.37647529538369	1528490060.03254	FALSE	0.475008249282837	5.79818205509065	1.18123789091089	2.48677342487065	1.32350184615045	2.78627128718009	2.02769972908774	1528490059.49253	0.540009498596191	3.75493344905775	1.31146440792984	0.475651287817348	0.880820224558737	0.731032248630449	6.00980083550114	1093.48046009437	201.140611923863	252.507412084202	1547.12848410244	0.36887	0.26071	0.96614	403	22	0.30214	63.84213	50.06888	2.63239	1972.72185
142394	5781643	3	8	YES	5.59	7.4	2.8023363040826	8.13697417093016	5.91885210239609	1533934302.41451	FALSE	0.486005544662476	5.76605829883851	1.13988879398088	2.34542343497854	1.24045733252744	2.55235222344823	1.69024306670639	1533934301.96151	0.453004837036133	3.73118105706136	1.22675005324533	0.43305045154884	0.955951054258387	3.67943630863609	2.53548164578276	1056.9277922093	174.875826549322	207.094456094446	1438.89807485307	0.40738	0.29924	0.45672	475	31	0.14970	62.94089	46.56628	1.19273	1944.87350
138448	5622858	3	8	YES	5.27	3.76	3.36502629049919	8.90605812412704	3.45293143245806	1531001334.31668	FALSE	0.594006061553955	5.6649696161283	1.38147282284932	2.32568809017757	0.66206770330344	1.11458071921258	1.95035915056924	1531001333.17267	1.14401173591614	1.70484190794369	0.659575335151697	0.639861823610858	0.559314038066618	0	3.98969589320792	834.70454209845	140.682651394246	32.3117633265117	1007.69895681921	1.02459	0.84870	0.43985	39	4	0.03655	34.01865	32.61162	1.34249	1051.17619
130359	5275425	3	8	YES	5.19	8	3.5583857553213	8.9955902502736	4.1773320912701	1523043350.8964	FALSE	0.6480131149292	5.4912249047769	1.0171429962987	1.5696333497970	0.50085941968452	0.772915560110604	1.0451833140742	1523043350.4864	0.41000819206238	2.54917666112189	0.50038168859511	0.51672980259636	1.26029141026954	0	6.0628882577951	718.9242802643200	58.7409712839537	14.2432399000169	791.908491448291	0.60016	0.54484	0.38880	245	60	0.09466	35.48966	25.62811	0.87907	1096.63052
136126	5523800	3	8	YES	4.95	7.4	3.19439795938908	8.71486166144303	8.92075719248736	1528512882.86028	FALSE	0.583008527755737	5.4791616371132	1.36591979709751	2.34288133375262	0.814569319977443	1.397182513115350	2.65760007459665	1528512881.26226	1.5980236530304	1.66305427930114	0.807031876014028	0.60529914673344	0.378779841953894	0.893811049212966	6.34592065966571	795.576234502441	145.463542895292	51.732070333791300	992.771847731524	0.14843	0.11895	0.48208	27	1	0.03744	33.03880	32.12854	1.85455	1020.89878
126968	5133175	3	8	YES	4.96	7.4	2.8146070178514	7.9617540729829	5.2703344456418	1521841860.8205	FALSE	0.51900768280029	5.42305463122487	0.61633187169179	1.18751974607850	0.84688039836399	1.63172998479459	2.1087519864961	1521841860.2485	0.57200837135315	3.68657539313212	0.84479283248792	0.48436648455198	0.84678216055852	0	6.1307120606547	875.472796928799	41.97941446384280	79.25949219420310	996.711703586845	0.38008	0.33384	0.42913	367	19	0.18338	44.76275	32.25604	1.25183	1383.16884
126968	5133172	3	8	YES	4.96	7.4	3.3809005549177	8.8200288323657	6.0681526242783	1521840822.8111	FALSE	0.62600922584534	5.40072001391394	1.2209926146275	1.95043869038626	0.80180399476964	1.28081817594128	1.6447596828565	1521840822.023	0.7880117893219	2.0872272536327	0.79904828219927	0.53216914401402	0.675331449637273	0.017656127893839	7.3137059476988	719.865029022118	93.8884905141732	40.48766342543430	854.241182961726	0.29638	0.24976	0.44361	85	9	0.06168	30.69897	27.64535	1.11270	948.59830
126968	5133174	3	8	YES	4.96	7.4	2.8548933401713	8.218180120299	5.6974919375655	1521841758.666	FALSE	0.52900791168213	5.39669308743108	1.2183811810174	2.30314359031647	1.2413089481951	2.34648465700259	1.8357031194769	1521841757.8559	0.81001210212708	2.26626628744974	1.2308668701314	0.48264838659001	0.59585330308348	0	6.3983141479393	850.592907191227	154.920306168141	160.805816728202	1166.31903008757	0.38790	0.28289	0.51182	98	7	0.07038	41.13441	37.74495	1.41186	1271.05328
116936	4728862	3	8	YES	5.74	15	4.2577747235738	9.2619470126247	6.7704614927308	1513298169.8093	FALSE	0.79099726676941	5.38279321869644	1.3779308493422	1.74201720692404	0.8577195708109	1.0843521297033	1.6124882819232	1513298169.0063	0.80299735069275	2.00808667741195	0.49050298881501	0.82645190537023	1.02920875723593	0	9.281489041916	565.938050118478	59.2732010401599	22.966466098692	648.17771725733	0.22826	0.19930	0.31758	78	20	0.04873	24.14705	20.97663	0.73670	746.14379
127365	5150596	3	8	YES	5.95	7.5	3.0207585733171	8.2438211263191	6.2643608980978	1522093040.7521	FALSE	0.57200169563293	5.2810308017961	0.86597379550554	1.51393571403197	1.3907353346258	2.43134827264267	3.7725687565405	1522093039.0351	1.7170052528381	2.1971795079279	1.3807020503467	0.57573797508141	0.335315208925396	1.1757950443519	5.6286489522705	753.301042778001	61.90789480079890	159.670804353952	974.879741932752	0.29000	0.22409	0.32145	43	1	0.04400	32.98807	31.54951	1.34503	1019.33128
126968	5133175	3	8	YES	4.96	7.4	3.6318131709354	8.9779001634559	7.0706749232471	1521841853.8674	FALSE	0.7020103931427	5.1734464424050	1.2504525975875	1.7812451351177	0.75547774416332	1.07616319009361	1.8913710355081	1521841853.0354	0.83201241493225	2.27324857365513	0.7488780916087	0.68686697771889	0.82554895262569	0	8.0537485210251	589.0400940887850	69.8284375183941	25.4883198250889	684.356851432268	0.19611	0.16880	0.39854	96	13	0.07497	25.66256	22.14747	1.00909	792.97300
142394	5781629	3	8	YES	5.59	7.4	2.58488683535367	7.18171560685947	2.79260889897178	1533930574.01239	FALSE	0.507005453109741	5.0983412890318	0.600236286593926	1.183885267727100	0.523790089926574	1.033105436467960	3.62790031469699	1533930572.60838	1.40401554107666	2.58394598105015	0.586801249988793	0.770099826311447	0.548498078390857	1.28391849040332	5.87530967486702	792.088415979074	42.710542305834900	32.524089476829300	867.323047761738	1.15074	1.05092	0.28719	73	3	0.07041	30.55359	28.06871	1.17833	944.10591
126968	5133181	3	8	YES	4.96	7.4	2.770690458751	8.1412195669763	5.3808354304349	1521843719.2701	FALSE	0.55100798606873	5.02840345113509	1.0507976445533	1.90704612477654	0.77212907947629	1.40130288307650	1.736290736616	1521843718.5141	0.75601124763489	2.29664669943446	0.76839624057726	0.67350765163549	0.89086988287872	0	6.8686982458037	708.974837857261	101.974828797274	55.05979897820750	866.009465632743	0.33635	0.27536	0.39584	108	16	0.07777	32.03952	28.02620	1.07341	990.02116
142545	5788056	3	8	YES	4.69	4.2	3.3569049383754	8.75054489503287	3.75802933196951	1534885521.48472	FALSE	0.670008897781372	5.0102393408375	1.37631458808803	2.05417359776188	0.91844064711551	1.37078873154786	2.09874566588416	1534885520.76171	0.723009347915649	2.90279188219986	0.90350578056442	0.737318150338483	1.019790618840660	0.937862548680638	5.91477971171339	578.848429155195	97.3020968652668	43.3300275267308	719.480553547193	0.69660	0.56044	0.44726	180	22	0.13569	29.83053	23.28416	1.19134	921.76339
138448	5622858	3	8	YES	5.27	3.76	3.10924796836844	8.50754075804642	7.5777679594801	1531001331.35865	FALSE	0.626006364822388	4.96679929005291	1.18703049584857	1.89619557012868	0.436486533025629	0.697255742997869	1.87872323766335	1531001330.49465	0.864008903503418	2.17442578432401	0.412559197949352	0.509617771021902	0.589829304947534	0.364394641793838	7.54458527057247	608.839689285971	88.7392982920783	11.998692818879500	709.577680396929	0.15787	0.13546	0.32641	85	6	0.05763	25.90116	22.96368	0.87630	800.34596
142545	5788061	3	8	YES	4.69	4.2	2.08290364466946	4.74376276207946	6.05768566175532	1534887309.8741	FALSE	0.421005487442017	4.94745010884526	1.29748234300004	3.08186563287666	1.13570802766719	2.69760860973007	2.03012407061952	1534887309.29109	0.583007574081421	3.48215728383659	1.12647618960209	0.478637210697783	0.820979404001599	0	6.90786534372877	898.263129896993	348.552439728952	267.053703616896	1513.86927324284	0.35446	0.21032	0.59134	321	18	0.18348	59.96960	48.99253	1.72618	1853.06065
142544	5788044	3	8	YES	5.7	7.4	2.92429153575609	8.13748379178551	7.1086017978199	1534871443.86235	FALSE	0.594008922576904	4.92297577462314	1.35877696169551	2.28746894205044	0.93797660778232	1.5790614789307	2.5775569007339	1534871442.42633	1.43602132797241	1.79492940008996	0.92896163946542	1.01879876612352	0.70945935570610	0.530693868561462	7.48219196877554	630.363288573841	136.096177536112	64.8535260479426	831.312992157896	0.19943	0.15122	0.31018	35	5	0.03615	28.20036	26.90333	1.11114	871.39099
142394	5781641	3	8	YES	5.59	7.4	2.27425954487406	5.21215310234819	8.84272375157669	1533933387.25542	FALSE	0.4640052318573	4.90136616729676	1.73468496434791	3.73850302808955	1.40728842084937	3.03291498506674	1.61882860602	1533933386.57441	0.681007623672485	2.37710790562095	1.39152448098796	0.556424059650735	0.817059956906348	0	8.55839944277177	799.907748326061	465.372889659346	306.28524816145	1571.56588614686	0.19032	0.09687	0.47625	128	15	0.06375	55.49862	50.85974	1.28242	1714.90736
142394	5781627	3	8	YES	5.59	7.4	2.80176583984734	7.83744918083248	8.7985048109111	1533929915.41613	FALSE	0.572006464004517	4.89813667529676	1.39043399842862	2.4308011988089	0.69085894621621	1.20778171173037	1.77676058102044	1533929914.78912	0.627006769180298	2.8337183398247	0.685608097720129	0.818052515829543	1.304694870996380	0	8.22191451730618	648.021396565599	159.597627435028	39.4007460833742	847.019770084001	0.12773	0.09772	0.31643	198	42	0.09820	35.17247	27.41164	0.85107	1086.82948
127365	5150599	3	8	YES	5.95	7.5	2.5864772900029	7.5666428066096	7.7336378088551	1522094174.8485	FALSE	0.52900171279907	4.88935522782573	1.4812242169272	2.8000367127163	1.0082270957651	1.90590516319945	1.8441063413163	1522094174.1575	0.69100189208984	2.6687428246239	0.99921252502028	0.64104580277587	0.92770484439213	1.3667666279895	7.62996404733	698.191549793771	228.980688482283	106.089885022681	1033.26212329874	0.18651	0.12603	0.31509	159	19	0.07110	39.21517	33.43890	0.85220	1211.74881
135804	5508087	3	8	YES	5.8	20.8	2.99213128521032	8.23212038530669	5.99841373833652	1529119751.10757	FALSE	0.615011692047119	4.86516162847369	1.39729180924342	2.2719760084437	0.692748137331152	1.126398321022610	1.93091636833305	1529119750.33855	0.769014596939087	2.51089690107143	0.686940587549199	0.681481963460472	0.886175589088918	0.367198979455886	7.68543595219498	594.620197873574	129.673906232617	31.873451915541400	756.167556021732	0.26377	0.20742	0.28213	127	16	0.06645	29.08118	24.47144	0.75451	898.60844
142772	5797657	3	8	YES	5.09	4.2	2.36447366146313	6.47526018999995	6.68332758181935	1535233674.45468	FALSE	0.486003637313843	4.86513573135306	1.50161139060535	3.08971224763831	0.500354142258335	1.029527566961860	1.66002085145963	1535233673.95767	0.49700403213501	3.34005509840349	0.497027693385268	0.652272049444093	1.31240796305432	0	8.10451153409206	752.452147985041	303.476476454417	33.694958359852100	1089.62358279931	0.24195	0.16708	0.41714	347	54	0.15673	48.21891	35.26290	1.15372	1489.96443
130359	5275426	3	8	YES	5.19	8	2.6158677434247	7.5704214949766	5.1389753074796	1523043767.3729	FALSE	0.54001092910767	4.84410148466298	1.136815580018	2.10517143031995	1.111343646645	2.05800213799639	3.0723659675397	1523043765.6138	1.7590355873108	1.7466195622777	1.1058900833104	0.64873909575642	0.36880384935714	1.1712074582827	5.3951973899298	671.355267090526	126.794632502418	121.176269280501	919.326168873445	0.38364	0.28016	0.37613	27	1	0.03730	30.65746	29.75166	1.65011	947.31563
130359	5275423	3	8	YES	5.19	8	2.2342292118599	5.7220643461563	6.6498325339259	1523043095.6352	FALSE	0.47500944137573	4.70354695559122	1.3923131756817	2.93112737222498	1.1659998963702	2.45468783313698	1.5501366770581	1523043094.9982	0.63701295852661	2.43344606465073	1.1576029952331	0.57637349504557	0.90480654644562	0.062880427796581	7.0519552339169	719.576894609465	279.44453725204	195.983171752985	1195.00460361449	0.26197	0.15775	0.43007	144	20	0.07890	43.96387	38.67329	1.14456	1358.48349
126968	5133174	3	8	YES	4.96	7.4	2.5684109726466	6.6589225293284	4.399230892947	1521841756.1179	FALSE	0.55000805854797	4.66976971106068	0.84148639371663	1.52995284457862	0.64314697305754	1.16934099975818	1.4087707739467	1521841755.5879	0.53000783920288	2.65801874943106	0.63864814955126	0.40063308336404	0.75590029756274	0	6.0726684304704	612.562432855999	65.75299235246460	38.40977699431550	716.725202202779	0.41569	0.35528	0.32701	206	17	0.09787	30.39908	23.19499	0.84157	939.33160
127365	5150603	3	8	YES	5.95	7.5	3.927329959033	9.1136752460945	6.4925826692813	1522094781.1452	FALSE	0.84200239181519	4.6642741127688	1.0257235295948	1.21819550581507	0.41666223760806	0.49484685751286	1.7560937710152	1522094780.3892	0.75600218772888	2.32286863651905	0.3590164098559	0.89662033622905	1.18600230367402	0.20300689631767	7.6087853242012	399.193342088538	27.2300942483873	4.49321077731732	430.916647114243	0.17566	0.16273	0.20916	110	29	0.06058	18.44440	13.94552	0.52501	569.93191
142547	5788083	3	8	YES	5.78	12.8	3.30171064253188	8.68674779252583	6.0281393189666	1534965571.20515	FALSE	0.713015556335449	4.63062918220334	1.27200645974747	1.78398135699165	0.700185211787449	0.982005519467287	1.37075738913011	1534965570.76214	0.443009376525879	3.0941949804307	0.695813084511612	0.456196346467345	1.029766796461240	0	6.84464878029615	464.632396001498	68.9620402548629	20.895719805407300	554.490156061768	0.22204	0.18606	0.24151	334	37	0.10037	29.94719	17.94467	0.65348	925.36818
136126	5523800	3	8	YES	4.95	7.4	2.44731146672356	6.38287325296877	7.24169281867586	1528512880.73325	FALSE	0.529007911682129	4.62622847915761	1.07768844900596	2.03718777206781	0.429460235032136	0.811821951143503	1.50249887397531	1528512880.05324	0.680010080337524	2.2095244135639	0.427901711293869	0.520055199416869	0.764775720910988	0.795397189183002	6.34849072553018	625.058221799975	121.207205360032	19.248101354779700	765.513528514787	0.15759	0.12868	0.33729	111	13	0.07035	28.79361	24.77390	0.89594	889.72242
130359	5275422	3	8	YES	5.19	8	2.3441953154832	6.1079856491082	6.4640590894725	1523042883.1619	FALSE	0.50701022148132	4.62356618498582	1.0883142712349	2.14653319622472	0.80914905968418	1.59592257789223	1.3094281468416	1523042882.5249	0.63701295852661	2.05557536831003	0.80497283039509	0.44308283625233	0.69556330106246	0.34590534656702	6.7877109667624	651.427257145463	140.406426861684	77.61316724149010	869.446851248637	0.21530	0.16132	0.33399	102	12	0.05512	31.83375	28.13744	0.85261	983.66292
142772	5797665	3	8	YES	5.09	4.2	2.64343308394613	7.31765671310394	5.02839699785898	1535235230.29574	FALSE	0.572004556655884	4.62134969588435	1.42559046287361	2.49227116512507	1.04039344804238	1.8188551750791	2.05234311585809	1535235229.50673	0.789005994796753	2.60117556696989	1.03111666768094	0.618784364323028	0.784258127826299	0	7.53202861706868	576.85499912635	167.772038340024	89.3563119218115	833.983349388186	0.38504	0.26632	0.37577	132	12	0.08983	31.66727	26.98975	1.04906	978.51857
136127	5523805	3	8	YES	6.48	20.8	3.48297121927352	8.81026244925151	5.25019934527949	1529294103.13469	FALSE	0.75500750541687	4.61316105374400	1.34978522369023	1.78777722606209	0.689482755185371	0.913213114093058	2.04537195235846	1529294102.37868	0.756007671356201	2.70549100208106	0.682285724940541	0.920517464500548	1.217603338401620	0	8.9470856295454	435.48625141635800	65.40395576285140	17.0655973220388	517.955804501248	0.28953	0.24343	0.19006	150	30	0.06610	22.58385	16.76232	0.51248	697.84102
146089	5934797	3	8	YES	6.14	8.18	2.67744133004219	7.35728623289573	3.832906507936	1538429378.30276	FALSE	0.58299994468689	4.59252415792279	1.69628986459093	2.90958837998167	1.13653803509689	1.94946508220903	2.05830695519685	1538429377.37376	0.92900013923645	2.21561533552469	1.12764429572398	0.423173098267293	0.455514569260561	0	9.18652740667865	558.93701234409600	224.34845208695000	100.71424274466700	883.99970717571300	0.71593	0.45267	0.27899	82	3	0.04279	31.36214	28.60840	0.79320	969.09019
136127	5523815	3	8	YES	6.48	20.8	2.96864722473053	8.03784109802376	4.29807883445897	1529297145.40452	FALSE	0.648006677627563	4.58119850801405	1.21983631123843	1.88244404471943	0.627025272339159	0.967621621793745	2.09224127977579	1529297144.60551	0.799008131027222	2.61854817057488	0.58661048843797	0.835691504608494	1.045911139269770	0	8.03791266257926	500.388388945336	84.487635119149	22.323389195209300	607.199413259694	0.43468	0.35821	0.19123	133	21	0.05970	24.62584	19.65047	0.53515	760.93839
117018	4731726	3	8	YES	6.16	40	2.9858209881889	8.0750816242686	8.9058933438262	1513374403.846	FALSE	0.65900278091431	4.53081697780748	1.644795855822	2.49588606218017	0.73035815831935	1.10827780924694	0.31735533448594	1513374403.637	0.20900082588196	1.51844057623570	0.72709535769661	0.48074887942428	2.30022478330205	0	7.1665216538783	481.276077431216	146.046363648375	28.79642082362700	656.118861903218	0.11125	0.08161	0.23255	170	391	0.06312	39.40746	21.23362	0.56846	1217.69057
127365	5150595	3	8	YES	5.95	7.5	4.3183889762307	9.2309100573896	7.1919883009668	1522092203.3727	FALSE	0.97200298309326	4.44277337759607	1.3096859778466	1.34740942222082	1.0128565808623	1.04203032138752	2.3682412015513	1522092202.4657	0.90700268745422	2.61106304789294	1.0077906703111	0.98634033693782	1.08747234223339	0	8.5825599783022	313.739505384821	28.857589145527	17.2592372533553	359.856331783703	0.13801	0.12032	0.20164	116	20	0.07125	16.05610	11.64584	0.53740	496.13355
142394	5781648	3	8	YES	5.59	7.4	2.57280520059899	6.96717013676663	6.70353948495347	1533937759.85338	FALSE	0.583001852035522	4.41303092197078	1.10083715860374	1.88822240402877	0.447907079716294	0.768277284458786	1.53739822785649	1533937759.19537	0.658001899719238	2.3364647252728	0.442242094381386	0.624975526968058	0.949808089056776	0.325673787177559	7.53360649643257	516.098373593062	94.4854295831135	15.642081151213500	626.225884327389	0.16580	0.13665	0.23844	128	21	0.06419	25.09994	20.26621	0.62861	775.58804
130359	5275424	3	8	YES	5.19	8	2.4237355035585	5.9454210129884	6.4589922589993	1523043262.9706	FALSE	0.5500111579895	4.4067024247620	1.3441791784559	2.4439125623731	1.3016815716016	2.3666457538057	2.7307707921107	1523043261.2006	1.7700357437134	1.5427772019913	1.2883186661659	0.55015319431458	0.310814737085705	0.89677434271386	6.9831875065066	545.4870348811410	167.7754109586110	157.3343305110770	870.5967763508290	0.23424	0.14677	0.36279	21	1	0.02899	28.87429	28.17465	1.56832	892.21558
[truncated: 1,202 more rows]
